# Supplementary material for: Novel diagnostic biomarkers related to immune infiltration in Parkinson’s disease by bioinformatics analysis
Source: Front Neurosci. 2023 Jan 26;17:1083928. doi: 10.3389/fnins.2023.1083928 (PMC9909419; doi:10.3389/fnins.2023.1083928)
Supplement: Supplementary file 3 [file Table_2.XLSX]

## Sheet: KEGG
Supplementary Table S2 | KEGG pathway enrichment analysis for the DEGs
ID	Description	GeneRatio	BgRatio	pvalue	p.adjust	qvalue	geneID	Count
hsa04721	Synaptic vesicle cycle	13/161	78/8170	3.02925e-09	6.45229e-07	5.5483e-07	6571/6531/9114/6857/155066/51606/526/6812/5864/534/523/1759/6616	13
hsa04145	Phagosome	14/161	152/8170	1.56722e-06	0.000166909	0.000143524	51143/9114/7280/7277/155066/51606/526/10381/10383/1780/534/523/203068/3920	14
hsa04966	Collecting duct acid secretion	6/161	27/8170	1.1208e-05	0.000795768	0.000684278	9114/155066/526/534/523/760	6
hsa04540	Gap junction	9/161	88/8170	5.40894e-05	0.00252075	0.00216758	3708/7280/7277/10381/10383/3356/5332/203068/3358	9
hsa04727	GABAergic synapse	9/161	89/8170	5.91724e-05	0.00252075	0.00216758	3763/2785/9568/57468/2744/5334/2560/54407/81539	9
hsa05012	Parkinson disease	15/161	266/8170	0.000229855	0.00805079	0.00692285	6571/6531/7054/3708/7280/7277/6622/7345/3831/10381/4719/10383/5718/203068/4698	15
hsa04728	Dopaminergic synapse	10/161	132/8170	0.00026458	0.00805079	0.00692285	6571/1644/6531/3763/7054/3708/2785/2890/50632/5332	10
hsa05022	Pathways of neurodegeneration - multiple diseases	21/161	476/8170	0.000407913	0.00829358	0.00713162	6531/5664/3708/7280/7277/6622/7345/2890/3831/10381/4719/10383/5718/5332/203068/55860/4744/4747/4698/8851/4741	21
hsa05110	Vibrio cholerae infection	6/161	50/8170	0.000413848	0.00829358	0.00713162	9114/155066/51606/526/534/523	6
hsa04726	Serotonergic synapse	9/161	115/8170	0.000423329	0.00829358	0.00713162	6571/1644/3763/3708/2785/3356/5332/2560/3358	9
hsa05120	Epithelial cell signaling in Helicobacter pylori infection	7/161	70/8170	0.000428307	0.00829358	0.00713162	9114/155066/51606/526/534/523/6416	7
hsa04070	Phosphatidylinositol signaling system	8/161	97/8170	0.000624579	0.0110863	0.00953304	8395/23262/3708/8867/5332/5297/3631/22876	8
hsa01200	Carbon metabolism	8/161	115/8170	0.00189686	0.0310794	0.026725	1738/5631/5213/55753/5214/2821/2026/4190	8
hsa05030	Cocaine addiction	5/161	49/8170	0.00264542	0.0355427	0.0305631	6571/1644/6531/7054/8851	5
hsa00020	Citrate cycle (TCA cycle)	4/161	30/8170	0.00266988	0.0355427	0.0305631	1738/47/55753/4190	4
hsa00030	Pentose phosphate pathway	4/161	30/8170	0.00266988	0.0355427	0.0305631	5631/5213/5214/2821	4
hsa00562	Inositol phosphate metabolism	6/161	73/8170	0.00305725	0.0383056	0.0329388	8395/8867/5332/5297/3631/22876	6
hsa05132	Salmonella infection	12/161	249/8170	0.00368158	0.0435654	0.0374617	113146/51143/7280/7277/3831/10381/10383/1780/203068/6990/55860/6416	12

## Sheet: GO
Supplementary Table S2 | GO enrichment analysis for the DEGs
ONTOLOGY	ID	Description	GeneRatio	BgRatio	pvalue	p.adjust	qvalue	geneID	Count
BP	GO:0006836	neurotransmitter transport	26/286	207/18800	1.18999e-16	3.91864e-13	3.35703e-13	6571/1644/6531/7054/22987/93664/26059/9783/27445/9143/9899/6857/5799/8618/6622/8867/1142/6812/3356/5864/22895/6853/9900/6616/54407/81539	26
BP	GO:0099003	vesicle-mediated transport in synapse	24/286	197/18800	3.73974e-15	6.15748e-12	5.275e-12	6571/1644/7054/93664/26059/9783/27445/6857/27065/273/8618/6622/8867/1142/6812/3356/50632/5864/9892/6853/1759/9900/8851/6616	24
BP	GO:0099504	synaptic vesicle cycle	22/286	183/18800	7.20564e-14	7.90939e-11	6.77583e-11	6571/1644/7054/93664/26059/9783/27445/6857/273/8618/6622/8867/1142/6812/3356/5864/9892/6853/1759/9900/8851/6616	22
BP	GO:0001505	regulation of neurotransmitter levels	23/286	213/18800	1.94683e-13	1.60273e-10	1.37303e-10	6571/6531/7054/93664/26059/9783/27445/9143/6857/5799/8618/6622/8867/1142/6812/3356/5864/22895/43/6853/9900/6616/81539	23
BP	GO:0099177	regulation of trans-synaptic signaling	29/286	430/18800	2.10583e-11	1.3869e-08	1.18813e-08	23316/26059/5577/9783/5999/6857/869/27065/6622/2890/1142/6812/5649/9590/4885/3356/5864/23154/43/6853/793/1759/27020/5334/6616/1996/7533/760/2171	29
BP	GO:0061564	axon development	30/286	479/18800	5.80252e-11	2.9525e-08	2.52935e-08	2258/4929/26050/9369/2596/5979/6585/9499/7504/3897/7070/7345/10479/6812/5649/10381/9331/51761/5864/9201/9315/2281/4744/4747/8851/10752/104/27020/885/22876	30
BP	GO:0007269	neurotransmitter secretion	17/286	145/18800	7.9662e-11	2.9525e-08	2.52935e-08	93664/26059/9783/27445/6857/5799/8618/6622/8867/1142/6812/3356/5864/22895/6853/9900/6616	17
BP	GO:0099643	signal release from synapse	17/286	145/18800	7.9662e-11	2.9525e-08	2.52935e-08	93664/26059/9783/27445/6857/5799/8618/6622/8867/1142/6812/3356/5864/22895/6853/9900/6616	17
BP	GO:0016079	synaptic vesicle exocytosis	15/286	107/18800	8.06939e-11	2.9525e-08	2.52935e-08	93664/26059/9783/27445/6857/8618/6622/8867/1142/6812/3356/5864/6853/9900/6616	15
BP	GO:0050804	modulation of chemical synaptic transmission	28/286	429/18800	1.0202e-10	3.35953e-08	2.87804e-08	23316/26059/5577/9783/5999/6857/869/27065/6622/2890/1142/6812/5649/9590/4885/3356/5864/23154/43/6853/793/1759/27020/5334/6616/1996/7533/760	28
BP	GO:0050808	synapse organization	27/286	419/18800	2.97962e-10	8.91991e-08	7.64153e-08	2258/5100/23316/26050/26059/7162/2596/27445/6585/54674/9499/3897/869/6622/119/5649/5864/65981/9118/43/6853/203068/4744/4747/8851/2743/27020	27
BP	GO:0007409	axonogenesis	27/286	430/18800	5.28428e-10	1.45009e-07	1.24227e-07	2258/4929/26050/9369/2596/5979/6585/9499/7504/3897/7070/7345/10479/6812/5649/10381/9331/51761/5864/9201/4744/4747/8851/10752/104/27020/885	27
BP	GO:0050890	cognition	22/286	306/18800	1.89744e-09	4.80636e-07	4.11752e-07	2258/23316/7054/5577/7162/9369/2019/8867/2890/5649/4885/3356/7991/65009/57468/2821/793/10752/6446/27020/6616/1996	22
BP	GO:0007611	learning or memory	20/286	264/18800	4.33128e-09	1.01878e-06	8.7277e-07	2258/23316/7054/5577/7162/9369/2019/8867/2890/5649/4885/3356/65009/57468/2821/793/6446/27020/6616/1996	20
BP	GO:0016082	synaptic vesicle priming	7/286	19/18800	7.55189e-09	1.65789e-06	1.42029e-06	26059/6622/8867/6812/5864/9900/6616	7
BP	GO:0042416	dopamine biosynthetic process	6/286	12/18800	1.00663e-08	2.07178e-06	1.77485e-06	1644/6531/4929/7054/2643/6622	6
BP	GO:0009713	catechol-containing compound biosynthetic process	7/286	22/18800	2.45791e-08	4.49661e-06	3.85216e-06	1644/6531/4929/7054/3642/2643/6622	7
BP	GO:0042423	catecholamine biosynthetic process	7/286	22/18800	2.45791e-08	4.49661e-06	3.85216e-06	1644/6531/4929/7054/3642/2643/6622	7
BP	GO:0007626	locomotory behavior	16/286	192/18800	4.21428e-08	7.30401e-06	6.25721e-06	6571/6531/4929/7054/3251/2019/6622/7345/5649/793/2743/10752/22876/6616/1996/3358	16
BP	GO:0007612	learning	14/286	145/18800	4.7497e-08	7.82038e-06	6.69958e-06	2258/7054/5577/7162/9369/2019/8867/5649/4885/65009/57468/27020/6616/1996	14
BP	GO:0023061	signal release	24/286	451/18800	1.17663e-07	1.77202e-05	1.51806e-05	185/93664/26059/25924/9783/27445/51760/6857/5799/8618/6622/8867/1142/6812/3356/5864/7447/5213/22895/6853/9900/2281/6616/3358	24
BP	GO:0045055	regulated exocytosis	17/286	234/18800	1.18386e-07	1.77202e-05	1.51806e-05	93664/26059/9783/27445/9143/51760/6857/8618/6622/8867/1142/6812/3356/5864/6853/9900/6616	17
BP	GO:0015837	amine transport	11/286	100/18800	3.55849e-07	5.09482e-05	4.36464e-05	6571/1644/7054/5999/51760/6857/6622/6812/3356/5864/9900	11
BP	GO:0006887	exocytosis	20/286	357/18800	6.20018e-07	8.50716e-05	7.28793e-05	286/93664/26059/9783/27445/9143/51760/6857/8618/6622/8867/1142/6812/3356/5864/7447/23400/6853/9900/6616	20
BP	GO:0072384	organelle transport along microtubule	10/286	85/18800	6.49703e-07	8.55788e-05	7.33138e-05	4976/3797/7345/10128/8120/1780/55860/4744/22920/4747	10
BP	GO:0019693	ribose phosphate metabolic process	21/286	394/18800	7.27441e-07	9.21331e-05	7.89288e-05	11332/55022/3251/4976/1738/5631/55312/3157/6622/54541/4830/3356/47/5213/523/55753/5214/2821/2026/26471/5166	21
BP	GO:0010975	regulation of neuron projection development	22/286	431/18800	8.12992e-07	9.91549e-05	8.49442e-05	2258/23316/5979/6585/7504/3897/7070/11075/5649/6014/51761/65981/65009/6383/2281/4747/8851/27020/22876/6616/1996/7533	22
BP	GO:0010970	transport along microtubule	13/286	157/18800	8.57109e-07	0.000100802	8.63553e-05	4976/3797/7345/3831/10128/50632/8120/1780/55860/4744/22920/4747/3315	13
BP	GO:0097479	synaptic vesicle localization	8/286	52/18800	1.09567e-06	0.000124416	0.000106585	27445/6622/8867/5864/8120/9892/6853/1759	8
BP	GO:0048813	dendrite morphogenesis	12/286	139/18800	1.46022e-06	0.000160284	0.000137312	23316/7162/23543/3251/25830/5649/65981/9201/6383/8851/1996/7533	12
BP	GO:0042401	cellular biogenic amine biosynthetic process	7/286	39/18800	1.77645e-06	0.000188705	0.00016166	1644/6531/4929/7054/3642/2643/6622	7
BP	GO:0009259	ribonucleotide metabolic process	20/286	384/18800	1.91706e-06	0.000197278	0.000169004	11332/55022/3251/4976/1738/55312/3157/6622/54541/4830/3356/47/5213/523/55753/5214/2821/2026/26471/5166	20
BP	GO:0030705	cytoskeleton-dependent intracellular transport	14/286	197/18800	2.041e-06	0.000203667	0.000174478	4976/3797/7345/3831/10128/50632/8120/1780/203068/55860/4744/22920/4747/3315	14
BP	GO:0009309	amine biosynthetic process	7/286	40/18800	2.12545e-06	0.000203859	0.000174642	1644/6531/4929/7054/3642/2643/6622	7
BP	GO:0048167	regulation of synaptic plasticity	14/286	198/18800	2.16673e-06	0.000203859	0.000174642	26059/9783/869/27065/6622/2890/6812/5649/5864/23154/793/27020/6616/7533	14
BP	GO:0042391	regulation of membrane potential	21/286	425/18800	2.43459e-06	0.000222697	0.000190781	2258/23316/3752/55800/55022/9783/5999/3759/1738/6328/869/6622/2890/1142/5649/4719/10962/2281/2743/2560/7533	21
BP	GO:0006584	catecholamine metabolic process	8/286	58/18800	2.57895e-06	0.000223486	0.000191457	1644/6531/4929/7054/3642/2643/3251/6622	8
BP	GO:0009712	catechol-containing compound metabolic process	8/286	58/18800	2.57895e-06	0.000223486	0.000191457	1644/6531/4929/7054/3642/2643/3251/6622	8
BP	GO:0006163	purine nucleotide metabolic process	20/286	394/18800	2.83379e-06	0.000239273	0.000204981	11332/55022/3251/4976/1738/5631/3157/6622/54541/4830/3356/47/5213/523/55753/5214/2821/2026/26471/5166	20
BP	GO:0042417	dopamine metabolic process	7/286	42/18800	2.99671e-06	0.000246704	0.000211347	1644/6531/4929/7054/2643/3251/6622	7
BP	GO:0017157	regulation of exocytosis	14/286	204/18800	3.07722e-06	0.000247153	0.000211732	93664/9783/27445/51760/6857/8618/6622/1142/6812/3356/5864/7447/23400/6853	14
BP	GO:0009150	purine ribonucleotide metabolic process	19/286	366/18800	3.65001e-06	0.000286178	0.000245163	11332/55022/3251/4976/1738/3157/6622/54541/4830/3356/47/5213/523/55753/5214/2821/2026/26471/5166	19
BP	GO:0007416	synapse assembly	13/286	180/18800	3.97073e-06	0.000304084	0.000260503	2258/23316/26050/7162/2596/27445/6585/54674/869/6622/119/43/27020	13
BP	GO:0006090	pyruvate metabolic process	10/286	106/18800	4.99601e-06	0.000373906	0.000320318	1738/54541/3356/5213/55753/5214/2821/2026/26471/5166	10
BP	GO:0001975	response to amphetamine	6/286	30/18800	5.13672e-06	0.000375894	0.000322022	6571/4929/7054/5999/3251/6000	6
BP	GO:0016241	regulation of macroautophagy	12/286	158/18800	5.58621e-06	0.0003999	0.000342587	9114/155066/51606/526/7345/23400/534/64112/523/10193/8851/26471	12
BP	GO:0009117	nucleotide metabolic process	22/286	487/18800	5.93172e-06	0.000415599	0.000356036	11332/55022/23057/3251/4976/1738/5631/55312/3157/6622/54541/4830/3356/47/5213/523/55753/5214/2821/2026/26471/5166	22
BP	GO:0072521	purine-containing compound metabolic process	20/286	416/18800	6.38987e-06	0.000438371	0.000375545	11332/55022/3251/4976/1738/5631/3157/6622/54541/4830/3356/47/5213/523/55753/5214/2821/2026/26471/5166	20
BP	GO:0046189	phenol-containing compound biosynthetic process	7/286	47/18800	6.54652e-06	0.000439953	0.0003769	1644/6531/4929/7054/3642/2643/6622	7
BP	GO:0006753	nucleoside phosphate metabolic process	22/286	495/18800	7.67182e-06	0.000505266	0.000432852	11332/55022/23057/3251/4976/1738/5631/55312/3157/6622/54541/4830/3356/47/5213/523/55753/5214/2821/2026/26471/5166	22
BP	GO:0099111	microtubule-based transport	13/286	198/18800	1.12021e-05	0.000723305	0.000619642	4976/3797/7345/3831/10128/50632/8120/1780/55860/4744/22920/4747/3315	13
BP	GO:0015872	dopamine transport	7/286	51/18800	1.14415e-05	0.000724556	0.000620714	6571/6531/51760/6857/6622/3356/5864	7
BP	GO:0140029	exocytic process	8/286	73/18800	1.48507e-05	0.000906659	0.000776718	26059/6857/6622/8867/6812/5864/9900/6616	8
BP	GO:0051656	establishment of organelle localization	19/286	404/18800	1.48678e-05	0.000906659	0.000776718	6585/4976/3797/6622/7345/8867/6812/10128/5864/23400/8120/1780/9892/55860/1759/4744/22920/4747/79789	19
BP	GO:0010506	regulation of autophagy	17/286	336/18800	1.66467e-05	0.000996683	0.00085384	3708/9114/155066/51606/526/6622/7345/55847/23400/534/64112/523/10193/8851/26471/3315/1917	17
BP	GO:0043279	response to alkaloid	9/286	97/18800	1.70724e-05	0.00100392	0.00086004	1644/6531/7054/5999/2019/5122/3356/2821/1996	9
BP	GO:0010976	positive regulation of neuron projection development	11/286	150/18800	1.91205e-05	0.00110463	0.000946314	23316/5979/11075/5649/6014/51761/65981/65009/2281/27020/1996	11
BP	GO:0006165	nucleoside diphosphate phosphorylation	9/286	99/18800	2.01386e-05	0.00112876	0.000966988	54541/4830/3356/5213/55753/5214/2821/2026/26471	9
BP	GO:0046034	ATP metabolic process	15/286	273/18800	2.02238e-05	0.00112876	0.000966988	55022/1738/526/6622/54541/4719/3356/5213/523/55753/5214/2821/2026/4698/26471	15
BP	GO:0050905	neuromuscular process	11/286	152/18800	2.16441e-05	0.00117897	0.00101	6531/23543/3708/2643/3759/7345/51761/4747/23261/2743/104	11
BP	GO:0046939	nucleotide phosphorylation	9/286	100/18800	2.18394e-05	0.00117897	0.00101	54541/4830/3356/5213/55753/5214/2821/2026/26471	9
BP	GO:0072503	cellular divalent inorganic cation homeostasis	21/286	494/18800	2.40308e-05	0.00126803	0.0010863	185/3708/2785/309/7504/7070/6622/2890/57419/3356/23400/793/9900/2281/5910/6863/27020/4494/4499/100133941/3358	21
BP	GO:0008088	axo-dendritic transport	8/286	78/18800	2.42593e-05	0.00126803	0.0010863	4976/7345/3831/50632/8120/55860/4747/3315	8
BP	GO:0007274	neuromuscular synaptic transmission	5/286	24/18800	2.63806e-05	0.00135736	0.00116283	26059/23504/6812/5864/104	5
BP	GO:0048489	synaptic vesicle transport	6/286	40/18800	2.9226e-05	0.00148063	0.00126843	6622/8867/5864/8120/9892/1759	6
BP	GO:0006096	glycolytic process	8/286	81/18800	3.19952e-05	0.00159636	0.00136758	54541/3356/5213/55753/5214/2821/2026/26471	8
BP	GO:0055074	calcium ion homeostasis	20/286	468/18800	3.49471e-05	0.00169456	0.0014517	185/3708/2785/309/7504/7070/6622/29887/2890/57419/3356/23400/793/9900/2281/5910/6863/27020/100133941/3358	20
BP	GO:0006757	ATP generation from ADP	8/286	82/18800	3.49924e-05	0.00169456	0.0014517	54541/3356/5213/55753/5214/2821/2026/26471	8
BP	GO:0045921	positive regulation of exocytosis	8/286	83/18800	3.82208e-05	0.00182407	0.00156265	93664/6857/8618/6622/6812/5864/7447/23400	8
BP	GO:0034643	establishment of mitochondrion localization, microtubule-mediated	5/286	26/18800	3.98225e-05	0.00184698	0.00158227	4976/7345/10128/55860/4747	5
BP	GO:0047497	mitochondrion transport along microtubule	5/286	26/18800	3.98225e-05	0.00184698	0.00158227	4976/7345/10128/55860/4747	5
BP	GO:0001504	neurotransmitter uptake	6/286	43/18800	4.46778e-05	0.0020154	0.00172655	6571/6531/9143/6622/6616/81539	6
BP	GO:0014075	response to amine	6/286	43/18800	4.46778e-05	0.0020154	0.00172655	6571/4929/7054/5999/3251/6000	6
BP	GO:0046928	regulation of neurotransmitter secretion	8/286	86/18800	4.94343e-05	0.00219983	0.00188455	9783/6857/6622/1142/6812/3356/5864/6853	8
BP	GO:0051452	intracellular pH reduction	6/286	44/18800	5.10774e-05	0.00224264	0.00192123	23312/9114/155066/51606/57468/760	6
BP	GO:0098930	axonal transport	7/286	64/18800	5.18729e-05	0.0022476	0.00192548	4976/7345/50632/8120/55860/4747/3315	7
BP	GO:0016358	dendrite development	13/286	231/18800	5.64594e-05	0.00241456	0.00206851	23316/7162/23543/3251/25830/5649/65981/9201/57468/6383/8851/1996/7533	13
BP	GO:0017156	calcium-ion regulated exocytosis	7/286	65/18800	5.73859e-05	0.00242271	0.00207549	93664/9783/51760/6857/8618/6812/5864	7
BP	GO:0046031	ADP metabolic process	8/286	90/18800	6.85331e-05	0.00285083	0.00244225	54541/3356/5213/55753/5214/2821/2026/26471	8
BP	GO:0051654	establishment of mitochondrion localization	5/286	29/18800	6.92579e-05	0.00285083	0.00244225	4976/7345/10128/55860/4747	5
BP	GO:0006874	cellular calcium ion homeostasis	19/286	456/18800	7.67959e-05	0.00312208	0.00267463	185/3708/2785/309/7504/7070/6622/2890/57419/3356/23400/793/9900/2281/5910/6863/27020/100133941/3358	19
BP	GO:0051952	regulation of amine transport	8/286	92/18800	8.01686e-05	0.00321946	0.00275805	5999/51760/6857/6622/6812/3356/5864/9900	8
BP	GO:0043523	regulation of neuron apoptotic process	12/286	207/18800	8.1967e-05	0.00323921	0.00277497	4929/2632/2019/6622/6812/2821/4747/8851/10752/26471/6416/6733	12
BP	GO:0061684	chaperone-mediated autophagy	4/286	16/18800	8.26279e-05	0.00323921	0.00277497	6622/23400/3920/1917	4
BP	GO:0006885	regulation of pH	8/286	93/18800	8.65737e-05	0.00332578	0.00284914	23312/9114/155066/51606/10479/57468/5166/760	8
BP	GO:0051402	neuron apoptotic process	13/286	241/18800	8.68562e-05	0.00332578	0.00284914	4929/2632/2019/6622/6812/2821/4747/8851/10752/104/26471/6416/6733	13
BP	GO:0050807	regulation of synapse organization	12/286	209/18800	8.98396e-05	0.00340048	0.00291313	5100/23316/26050/7162/6585/54674/869/6622/5649/65981/203068/8851	12
BP	GO:0006813	potassium ion transport	13/286	243/18800	9.43977e-05	0.0035324	0.00302615	3763/3752/5999/3759/3790/81831/10479/57419/3356/3785/6000/57468/6616	13
BP	GO:1901214	regulation of neuron death	15/286	313/18800	9.62368e-05	0.00356076	0.00305044	4929/2632/2019/6622/54541/6812/23400/2821/2026/4747/8851/10752/26471/6416/6733	15
BP	GO:0070997	neuron death	16/286	353/18800	0.000108483	0.00396929	0.00340042	4929/2632/2019/6622/54541/6812/23400/2821/2026/4747/8851/10752/104/26471/6416/6733	16
BP	GO:0051937	catecholamine transport	7/286	72/18800	0.000110917	0.00401372	0.00343848	6571/6531/51760/6857/6622/3356/5864	7
BP	GO:0050803	regulation of synapse structure or activity	12/286	215/18800	0.000117485	0.00420519	0.00360251	5100/23316/26050/7162/6585/54674/869/6622/5649/65981/203068/8851	12
BP	GO:0036465	synaptic vesicle recycling	7/286	73/18800	0.000121105	0.00428817	0.0036736	6857/273/6622/8867/5864/9892/1759	7
BP	GO:0034765	regulation of ion transmembrane transport	19/286	476/18800	0.000134378	0.00465233	0.00398557	2258/3763/3752/5664/55800/149111/5999/3759/3790/6328/7070/27075/6622/81831/5649/3785/6000/2281/7533	19
BP	GO:0051588	regulation of neurotransmitter transport	8/286	99/18800	0.000134552	0.00465233	0.00398557	9783/6857/6622/1142/6812/3356/5864/6853	8
BP	GO:0019896	axonal transport of mitochondrion	4/286	18/18800	0.000135628	0.00465233	0.00398557	4976/7345/55860/4747	4
BP	GO:0071805	potassium ion transmembrane transport	12/286	219/18800	0.000139724	0.00474343	0.00406361	3763/3752/5999/3759/3790/81831/10479/57419/3785/6000/57468/6616	12
BP	GO:0055067	monovalent inorganic cation homeostasis	10/286	157/18800	0.00014886	0.00500201	0.00428513	185/23312/3759/9114/155066/51606/10479/57468/5166/760	10
BP	GO:0051648	vesicle localization	11/286	189/18800	0.000156096	0.00514755	0.00440981	27445/6622/8867/5864/23400/8120/1780/9892/6853/1759/22920	11
BP	GO:0008344	adult locomotory behavior	7/286	76/18800	0.000156318	0.00514755	0.00440981	4929/2019/6622/7345/2743/10752/22876	7
BP	GO:0051453	regulation of intracellular pH	7/286	77/18800	0.000169744	0.00547284	0.00468848	23312/9114/155066/51606/10479/57468/760	7
BP	GO:0009132	nucleoside diphosphate metabolic process	9/286	130/18800	0.000170081	0.00547284	0.00468848	54541/4830/3356/5213/55753/5214/2821/2026/26471	9
BP	GO:0046390	ribose phosphate biosynthetic process	11/286	191/18800	0.000171182	0.00547284	0.00468848	11332/55022/3251/1738/5631/55312/6622/4830/47/523/5166	11
BP	GO:0009135	purine nucleoside diphosphate metabolic process	8/286	103/18800	0.000177349	0.005562	0.00476486	54541/3356/5213/55753/5214/2821/2026/26471	8
BP	GO:0009179	purine ribonucleoside diphosphate metabolic process	8/286	103/18800	0.000177349	0.005562	0.00476486	54541/3356/5213/55753/5214/2821/2026/26471	8
BP	GO:0060078	regulation of postsynaptic membrane potential	9/286	131/18800	0.000180236	0.00559923	0.00479676	23316/5999/869/6622/2890/1142/5649/2743/2560	9
BP	GO:0050806	positive regulation of synaptic transmission	10/286	161/18800	0.000182895	0.00562873	0.00482203	9783/6857/27065/6622/6812/5649/793/27020/6616/760	10
BP	GO:2000300	regulation of synaptic vesicle exocytosis	6/286	56/18800	0.00020168	0.00606545	0.00519616	9783/6857/1142/3356/5864/6853	6
BP	GO:0099173	postsynapse organization	10/286	163/18800	0.000202229	0.00606545	0.00519616	23316/2596/869/5649/65981/9118/4744/4747/8851/2743	10
BP	GO:0006576	cellular biogenic amine metabolic process	8/286	105/18800	0.000202611	0.00606545	0.00519616	1644/6531/4929/7054/3642/2643/3251/6622	8
BP	GO:0008306	associative learning	7/286	80/18800	0.000215713	0.00639949	0.00548232	7162/5649/4885/65009/27020/6616/1996	7
BP	GO:0014046	dopamine secretion	5/286	37/18800	0.000230164	0.00666559	0.00571029	51760/6857/6622/3356/5864	5
BP	GO:0014059	regulation of dopamine secretion	5/286	37/18800	0.000230164	0.00666559	0.00571029	51760/6857/6622/3356/5864	5
BP	GO:0030004	cellular monovalent inorganic cation homeostasis	8/286	107/18800	0.000230755	0.00666559	0.00571029	23312/3759/9114/155066/51606/10479/57468/760	8
BP	GO:0030534	adult behavior	9/286	136/18800	0.000238905	0.00684098	0.00586054	4929/9369/2019/6622/7345/3356/2743/10752/22876	9
BP	GO:0031629	synaptic vesicle fusion to presynaptic active zone membrane	4/286	21/18800	0.000255901	0.00720242	0.00617018	6857/6812/5864/6616	4
BP	GO:0099558	maintenance of synapse structure	4/286	21/18800	0.000255901	0.00720242	0.00617018	26059/27445/869/5864	4
BP	GO:0031102	neuron projection regeneration	6/286	59/18800	0.000269421	0.00744308	0.00637635	2596/7070/9315/2281/4747/22876	6
BP	GO:0015844	monoamine transport	7/286	83/18800	0.000271233	0.00744308	0.00637635	6571/6531/51760/6857/6622/3356/5864	7
BP	GO:0030641	regulation of cellular pH	7/286	83/18800	0.000271233	0.00744308	0.00637635	23312/9114/155066/51606/10479/57468/760	7
BP	GO:1903532	positive regulation of secretion by cell	13/286	274/18800	0.000307612	0.00820713	0.00703089	93664/25924/28984/6857/5122/8618/6622/6812/5864/7447/5213/23400/43	13
BP	GO:0001919	regulation of receptor recycling	4/286	22/18800	0.000309045	0.00820713	0.00703089	27065/6622/43/22876	4
BP	GO:0031338	regulation of vesicle fusion	4/286	22/18800	0.000309045	0.00820713	0.00703089	6857/6622/6812/5864	4
BP	GO:0099500	vesicle fusion to plasma membrane	4/286	22/18800	0.000309045	0.00820713	0.00703089	6857/6812/5864/6616	4
BP	GO:0048284	organelle fusion	9/286	141/18800	0.000312613	0.00823547	0.00705518	55022/10451/4976/6857/6622/6812/5864/23400/6616	9
BP	GO:0009185	ribonucleoside diphosphate metabolic process	8/286	112/18800	0.000315362	0.00824196	0.00706073	54541/3356/5213/55753/5214/2821/2026/26471	8
BP	GO:0048488	synaptic vesicle endocytosis	6/286	61/18800	0.000323697	0.0083276	0.0071341	6857/273/6622/8867/9892/1759	6
BP	GO:0140238	presynaptic endocytosis	6/286	61/18800	0.000323697	0.0083276	0.0071341	6857/273/6622/8867/9892/1759	6
BP	GO:0018958	phenol-containing compound metabolic process	8/286	113/18800	0.000334992	0.00855138	0.00732581	1644/6531/4929/7054/3642/2643/3251/6622	8
BP	GO:0018105	peptidyl-serine phosphorylation	14/286	315/18800	0.000354009	0.00896731	0.00768213	5979/64754/6622/10178/54541/1195/65981/9201/2872/8851/6446/6733/22876/5334	14
BP	GO:1901215	negative regulation of neuron death	11/286	209/18800	0.000372058	0.00935257	0.00801218	4929/2632/2019/6622/6812/23400/2821/2026/4747/10752/6416	11
BP	GO:0043524	negative regulation of neuron apoptotic process	9/286	145/18800	0.000384303	0.0095631	0.00819254	4929/2632/2019/6622/6812/2821/4747/10752/6416	9
BP	GO:0099566	regulation of postsynaptic cytosolic calcium ion concentration	3/286	10/18800	0.000386241	0.0095631	0.00819254	3708/2890/793	3
BP	GO:0044106	cellular amine metabolic process	8/286	116/18800	0.00039994	0.00982838	0.00841979	1644/6531/4929/7054/3642/2643/3251/6622	8
BP	GO:0048857	neural nucleus development	6/286	64/18800	0.000420769	0.0102637	0.00879269	9143/10409/9118/8851/2254/7533	6
BP	GO:0007035	vacuolar acidification	4/286	24/18800	0.000438309	0.0106129	0.00909187	23312/9114/155066/51606	4
BP	GO:0030901	midbrain development	7/286	90/18800	0.000445988	0.01072	0.00918362	4929/9143/2019/10409/9118/2254/7533	7
BP	GO:0006735	NADH regeneration	3/286	11/18800	0.000525115	0.0122387	0.0104847	5213/5214/2026	3
BP	GO:0061621	canonical glycolysis	3/286	11/18800	0.000525115	0.0122387	0.0104847	5213/5214/2026	3
BP	GO:0061718	glucose catabolic process to pyruvate	3/286	11/18800	0.000525115	0.0122387	0.0104847	5213/5214/2026	3
BP	GO:0021762	substantia nigra development	5/286	44/18800	0.000525799	0.0122387	0.0104847	9143/10409/9118/2254/7533	5
BP	GO:0009308	amine metabolic process	8/286	121/18800	0.000530697	0.0122387	0.0104847	1644/6531/4929/7054/3642/2643/3251/6622	8
BP	GO:0009260	ribonucleotide biosynthetic process	10/286	184/18800	0.000531471	0.0122387	0.0104847	11332/55022/3251/1738/55312/6622/4830/47/523/5166	10
BP	GO:0009165	nucleotide biosynthetic process	12/286	255/18800	0.000559933	0.0127312	0.0109066	11332/55022/23057/3251/1738/5631/55312/6622/4830/47/523/5166	12
BP	GO:0007613	memory	8/286	122/18800	0.000560591	0.0127312	0.0109066	2258/23316/7054/2890/5649/3356/793/6446	8
BP	GO:1901293	nucleoside phosphate biosynthetic process	12/286	257/18800	0.000599982	0.0134878	0.0115548	11332/55022/23057/3251/1738/5631/55312/6622/4830/47/523/5166	12
BP	GO:0048499	synaptic vesicle membrane organization	4/286	26/18800	0.000602098	0.0134878	0.0115548	6857/6812/5864/6616	4
BP	GO:0060079	excitatory postsynaptic potential	7/286	95/18800	0.000618508	0.0137618	0.0117895	23316/5999/869/6622/1142/5649/2743	7
BP	GO:0001921	positive regulation of receptor recycling	3/286	12/18800	0.000692294	0.0151982	0.01302	27065/6622/22876	3
BP	GO:0099188	postsynaptic cytoskeleton organization	3/286	12/18800	0.000692294	0.0151982	0.01302	9118/4744/4747	3
BP	GO:0018209	peptidyl-serine modification	14/286	338/18800	0.000710785	0.0155008	0.0132792	5979/64754/6622/10178/54541/1195/65981/9201/2872/8851/6446/6733/22876/5334	14
BP	GO:0042220	response to cocaine	5/286	47/18800	0.000715616	0.0155034	0.0132815	6531/5999/2019/3356/1996	5
BP	GO:0051047	positive regulation of secretion	13/286	300/18800	0.000723143	0.0155641	0.0133335	93664/25924/28984/6857/5122/8618/6622/6812/5864/7447/5213/23400/43	13
BP	GO:0006164	purine nucleotide biosynthetic process	10/286	192/18800	0.000739477	0.0158123	0.0135461	11332/55022/3251/1738/5631/6622/4830/47/523/5166	10
BP	GO:0001933	negative regulation of protein phosphorylation	14/286	341/18800	0.000774439	0.0163476	0.0140047	5577/3642/55022/64754/7070/6622/7345/54541/26973/104/26585/22876/3315/3486	14
BP	GO:0031346	positive regulation of cell projection organization	14/286	341/18800	0.000774439	0.0163476	0.0140047	23316/5979/3897/10178/11075/5649/6014/51761/65981/65009/2281/4747/27020/1996	14
BP	GO:0042326	negative regulation of phosphorylation	15/286	382/18800	0.000800196	0.0167837	0.0143783	5577/3642/55022/64754/7070/6622/7345/54541/26973/104/26471/26585/22876/3315/3486	15
BP	GO:0033555	multicellular organismal response to stress	6/286	73/18800	0.000852519	0.017768	0.0152215	4929/5979/2643/5649/6863/3358	6
BP	GO:0016236	macroautophagy	13/286	306/18800	0.000867662	0.0179699	0.0153945	9114/155066/51606/526/7345/23400/534/64112/523/10193/8851/3920/26471	13
BP	GO:0061620	glycolytic process through glucose-6-phosphate	3/286	13/18800	0.000889886	0.0181169	0.0155204	5213/5214/2026	3
BP	GO:0098814	spontaneous synaptic transmission	3/286	13/18800	0.000889886	0.0181169	0.0155204	6857/27065/22895	3
BP	GO:0099565	chemical synaptic transmission, postsynaptic	7/286	101/18800	0.000891265	0.0181169	0.0155204	23316/5999/869/6622/1142/5649/2743	7
BP	GO:0048265	response to pain	4/286	29/18800	0.000922888	0.0186446	0.0159725	5979/2643/5649/6863	4
BP	GO:0001764	neuron migration	9/286	164/18800	0.000934384	0.0187617	0.0160728	2258/4929/7280/54541/5649/9201/8851/10752/885	9
BP	GO:0007411	axon guidance	11/286	234/18800	0.000951679	0.0188947	0.0161868	9369/2596/5979/6585/9499/3897/5649/10381/8851/10752/27020	11
BP	GO:0051646	mitochondrion localization	5/286	50/18800	0.000952482	0.0188947	0.0161868	4976/7345/10128/55860/4747	5
BP	GO:0140056	organelle localization by membrane tethering	6/286	75/18800	0.000983249	0.0193117	0.016544	5664/6857/6812/5864/65009/6616	6
BP	GO:0097485	neuron projection guidance	11/286	235/18800	0.000985231	0.0193117	0.016544	9369/2596/5979/6585/9499/3897/5649/10381/8851/10752/27020	11
BP	GO:0051963	regulation of synapse assembly	7/286	103/18800	0.00100068	0.0194985	0.016704	23316/26050/7162/6585/54674/869/6622	7
BP	GO:1904062	regulation of cation transmembrane transport	14/286	352/18800	0.00105069	0.0201456	0.0172583	2258/5664/55800/149111/5999/3759/7070/27075/6622/81831/5649/6000/2281/7533	14
BP	GO:0006734	NADH metabolic process	4/286	30/18800	0.00105224	0.0201456	0.0172583	5213/5214/2026/4190	4
BP	GO:1903579	negative regulation of ATP metabolic process	4/286	30/18800	0.00105224	0.0201456	0.0172583	55022/6622/54541/26471	4
BP	GO:0072522	purine-containing compound biosynthetic process	10/286	202/18800	0.00108952	0.0206627	0.0177014	11332/55022/3251/1738/5631/6622/4830/47/523/5166	10
BP	GO:0098657	import into cell	11/286	238/18800	0.00109181	0.0206627	0.0177014	6571/6531/3763/5999/9143/3759/6622/10479/57468/6616/81539	11
BP	GO:0007018	microtubule-based movement	15/286	395/18800	0.00111965	0.0207273	0.0177567	51143/4976/3797/7345/3831/10128/50632/8120/1780/6990/55860/4744/22920/4747/3315	15
BP	GO:0061615	glycolytic process through fructose-6-phosphate	3/286	14/18800	0.00111989	0.0207273	0.0177567	5213/5214/2026	3
BP	GO:0097091	synaptic vesicle clustering	3/286	14/18800	0.00111989	0.0207273	0.0177567	27445/5864/6853	3
BP	GO:0006906	vesicle fusion	7/286	105/18800	0.0011204	0.0207273	0.0177567	10451/6857/6622/6812/5864/23400/6616	7
BP	GO:0031103	axon regeneration	5/286	52/18800	0.00113986	0.0209697	0.0179643	2596/9315/2281/4747/22876	5
BP	GO:0007631	feeding behavior	7/286	106/18800	0.00118432	0.0216665	0.0185613	7054/2019/7345/51761/2744/885/3358	7
BP	GO:0009152	purine ribonucleotide biosynthetic process	9/286	170/18800	0.00120305	0.0218693	0.018735	11332/55022/3251/1738/6622/4830/47/523/5166	9
BP	GO:0045936	negative regulation of phosphate metabolic process	16/286	440/18800	0.00121533	0.0218693	0.018735	5577/3642/55022/64754/7070/6622/7345/54541/2281/26973/104/26471/26585/22876/3315/3486	16
BP	GO:0051960	regulation of nervous system development	16/286	440/18800	0.00121533	0.0218693	0.018735	2258/23316/26050/7162/6585/54674/3897/869/7070/8867/5649/65981/4747/8851/27020/7533	16
BP	GO:0010563	negative regulation of phosphorus metabolic process	16/286	441/18800	0.00124416	0.0222664	0.0190752	5577/3642/55022/64754/7070/6622/7345/54541/2281/26973/104/26471/26585/22876/3315/3486	16
BP	GO:0090066	regulation of anatomical structure size	17/286	487/18800	0.00134161	0.0238688	0.020448	185/2258/5979/10451/2643/6585/7504/3897/119/10178/3356/23108/23400/57468/4747/5910/8851	17
BP	GO:0090183	regulation of kidney development	4/286	32/18800	0.00134819	0.0238688	0.020448	5979/9500/10409/26585	4
BP	GO:0051650	establishment of vesicle localization	9/286	173/18800	0.00135905	0.0239323	0.0205024	6622/8867/5864/23400/8120/1780/9892/1759/22920	9
BP	GO:1903305	regulation of regulated secretory pathway	8/286	140/18800	0.00137561	0.0240024	0.0205624	9783/51760/6857/1142/6812/3356/5864/6853	8
BP	GO:0021954	central nervous system neuron development	6/286	80/18800	0.0013776	0.0240024	0.0205624	4929/3251/9331/9201/104/2560	6
BP	GO:0090174	organelle membrane fusion	7/286	109/18800	0.00139339	0.0241496	0.0206885	10451/6857/6622/6812/5864/23400/6616	7
BP	GO:0006898	receptor-mediated endocytosis	11/286	246/18800	0.00142333	0.0245393	0.0210224	6622/8867/2890/60682/50632/9892/43/1759/26585/22876/6616	11
BP	GO:0001881	receptor recycling	4/286	33/18800	0.00151598	0.025866	0.0221589	27065/6622/43/22876	4
BP	GO:0006084	acetyl-CoA metabolic process	4/286	33/18800	0.00151598	0.025866	0.0221589	1738/3157/47/5166	4
BP	GO:0006814	sodium ion transport	11/286	249/18800	0.00156719	0.0266019	0.0227893	6531/2258/55800/6328/81831/10479/57419/6446/54407/7533/81539	11
BP	GO:0050433	regulation of catecholamine secretion	5/286	56/18800	0.00159469	0.0269299	0.0230703	51760/6857/6622/3356/5864	5
BP	GO:0033135	regulation of peptidyl-serine phosphorylation	8/286	144/18800	0.00164564	0.0276484	0.0236859	5979/64754/6622/10178/54541/65981/22876/5334	8
BP	GO:0048678	response to axon injury	6/286	83/18800	0.00166613	0.0278505	0.023859	2596/5122/9315/2281/4747/22876	6
BP	GO:0031623	receptor internalization	7/286	113/18800	0.00171575	0.0282875	0.0242334	6622/2890/50632/43/1759/26585/6616	7
BP	GO:0008361	regulation of cell size	9/286	179/18800	0.0017199	0.0282875	0.0242334	2258/5979/10451/6585/7504/3897/23108/57468/8851	9
BP	GO:0048278	vesicle docking	5/286	57/18800	0.00172663	0.0282875	0.0242334	6857/6812/5864/65009/6616	5
BP	GO:0050432	catecholamine secretion	5/286	57/18800	0.00172663	0.0282875	0.0242334	51760/6857/6622/3356/5864	5
BP	GO:0022406	membrane docking	6/286	84/18800	0.00177182	0.0288842	0.0247446	5664/6857/6812/5864/65009/6616	6
BP	GO:0007616	long-term memory	4/286	35/18800	0.00189418	0.0305761	0.026194	2890/5649/793/6446	4
BP	GO:0021955	central nervous system neuron axonogenesis	4/286	35/18800	0.00189418	0.0305761	0.026194	4929/9331/9201/104	4
BP	GO:1900542	regulation of purine nucleotide metabolic process	6/286	86/18800	0.00199839	0.0317168	0.0271712	55022/6622/54541/3356/26471/5166	6
BP	GO:0001956	positive regulation of neurotransmitter secretion	3/286	17/18800	0.00202263	0.0317168	0.0271712	6857/6622/6812	3
BP	GO:0007158	neuron cell-cell adhesion	3/286	17/18800	0.00202263	0.0317168	0.0271712	9369/5979/8851	3
BP	GO:0048791	calcium ion-regulated exocytosis of neurotransmitter	3/286	17/18800	0.00202263	0.0317168	0.0271712	9783/6857/6812	3
BP	GO:0050884	neuromuscular process controlling posture	3/286	17/18800	0.00202263	0.0317168	0.0271712	2643/51761/104	3
BP	GO:0061548	ganglion development	3/286	17/18800	0.00202263	0.0317168	0.0271712	3642/5999/10381	3
BP	GO:0034329	cell junction assembly	15/286	420/18800	0.00203993	0.0318364	0.0272737	2258/23316/26050/7162/2596/27445/6585/54674/869/7070/6622/119/43/26585/27020	15
BP	GO:0008654	phospholipid biosynthetic process	11/286	258/18800	0.00207178	0.032181	0.0275688	8395/9791/3157/8867/3356/10351/5297/3631/22876/2171/3358	11
BP	GO:0086010	membrane depolarization during action potential	4/286	36/18800	0.00210576	0.0325552	0.0278894	55800/3759/6328/7533	4
BP	GO:0033866	nucleoside bisphosphate biosynthetic process	5/286	60/18800	0.00217051	0.0330902	0.0283478	11332/1738/6622/47/5166	5
BP	GO:0034030	ribonucleoside bisphosphate biosynthetic process	5/286	60/18800	0.00217051	0.0330902	0.0283478	11332/1738/6622/47/5166	5
BP	GO:0034033	purine nucleoside bisphosphate biosynthetic process	5/286	60/18800	0.00217051	0.0330902	0.0283478	11332/1738/6622/47/5166	5
BP	GO:0006140	regulation of nucleotide metabolic process	6/286	88/18800	0.0022462	0.0339299	0.0290671	55022/6622/54541/3356/26471/5166	6
BP	GO:0045104	intermediate filament cytoskeleton organization	6/286	88/18800	0.0022462	0.0339299	0.0290671	51761/9118/10049/4744/4747/4741	6
BP	GO:0016052	carbohydrate catabolic process	8/286	152/18800	0.00231078	0.0347461	0.0297663	54541/3356/5213/55753/5214/2821/2026/26471	8
BP	GO:0043112	receptor metabolic process	5/286	61/18800	0.0023354	0.0349567	0.0299468	9737/27065/6622/43/22876	5
BP	GO:0045103	intermediate filament-based process	6/286	89/18800	0.00237845	0.0353004	0.0302412	51761/9118/10049/4744/4747/4741	6
BP	GO:0006085	acetyl-CoA biosynthetic process	3/286	18/18800	0.00240003	0.0353004	0.0302412	1738/47/5166	3
BP	GO:0048268	clathrin coat assembly	3/286	18/18800	0.00240003	0.0353004	0.0302412	27065/50632/9892	3
BP	GO:0031345	negative regulation of cell projection organization	9/286	188/18800	0.00240125	0.0353004	0.0302412	2258/6585/7070/11075/6014/5909/8851/22876/7533	9
BP	GO:0043484	regulation of RNA splicing	8/286	154/18800	0.00250613	0.0365163	0.0312829	23543/113146/1195/5935/23210/6733/1153/54407	8
BP	GO:0050770	regulation of axonogenesis	8/286	154/18800	0.00250613	0.0365163	0.0312829	2258/5979/6585/7504/3897/7070/4747/8851	8
BP	GO:0007340	acrosome reaction	4/286	38/18800	0.00257679	0.0373804	0.0320231	55521/6812/5864/2743	4
BP	GO:0016050	vesicle organization	12/286	306/18800	0.00264261	0.0381372	0.0326714	10451/6857/6622/8867/29887/6812/5864/10484/23400/9892/1759/6616	12
BP	GO:0051283	negative regulation of sequestering of calcium ion	7/286	122/18800	0.00265211	0.0381372	0.0326714	3708/309/7070/6622/3356/2281/3358	7
BP	GO:0051965	positive regulation of synapse assembly	5/286	63/18800	0.00269224	0.0385459	0.0330215	23316/26050/7162/54674/869	5
BP	GO:0061003	positive regulation of dendritic spine morphogenesis	3/286	19/18800	0.00281821	0.0401009	0.0343537	23316/5649/65981	3
BP	GO:0042755	eating behavior	4/286	39/18800	0.00283738	0.0401009	0.0343537	7054/7345/51761/885	4
BP	GO:0098815	modulation of excitatory postsynaptic potential	4/286	39/18800	0.00283738	0.0401009	0.0343537	23316/5999/869/5649	4
BP	GO:0009306	protein secretion	13/286	350/18800	0.00285306	0.0401501	0.0343958	25924/27445/7857/5799/869/5122/5864/7447/5213/23400/43/2281/6616	13
BP	GO:0048814	regulation of dendrite morphogenesis	5/286	64/18800	0.00288474	0.0403184	0.0345401	23316/5649/65981/6383/7533	5
BP	GO:0051282	regulation of sequestering of calcium ion	7/286	124/18800	0.00290519	0.0403184	0.0345401	3708/309/7070/6622/3356/2281/3358	7
BP	GO:0032535	regulation of cellular component size	13/286	351/18800	0.00292346	0.0403184	0.0345401	2258/5979/10451/6585/7504/3897/119/10178/23108/23400/57468/4747/8851	13
BP	GO:0035592	establishment of protein localization to extracellular region	13/286	351/18800	0.00292346	0.0403184	0.0345401	25924/27445/7857/5799/869/5122/5864/7447/5213/23400/43/2281/6616	13
BP	GO:0072593	reactive oxygen species metabolic process	10/286	231/18800	0.00292624	0.0403184	0.0345401	6571/185/55022/2643/55312/6622/54541/4719/10193/5166	10
BP	GO:0051962	positive regulation of nervous system development	11/286	270/18800	0.00294246	0.0403707	0.0345849	23316/26050/7162/54674/3897/869/8867/5649/65981/4747/27020	11
BP	GO:0006637	acyl-CoA metabolic process	6/286	93/18800	0.00296681	0.0403707	0.0345849	11332/1738/3157/6622/47/5166	6
BP	GO:0035383	thioester metabolic process	6/286	93/18800	0.00296681	0.0403707	0.0345849	11332/1738/3157/6622/47/5166	6
BP	GO:0034331	cell junction maintenance	4/286	40/18800	0.00311545	0.0420458	0.0360199	26059/27445/869/5864	4
BP	GO:0051955	regulation of amino acid transport	4/286	40/18800	0.00311545	0.0420458	0.0360199	5999/6622/6812/9900	4
BP	GO:0001657	ureteric bud development	6/286	94/18800	0.00312953	0.0420634	0.0360349	5979/5087/9500/10409/793/26585	6
BP	GO:0006007	glucose catabolic process	3/286	20/18800	0.00327854	0.0432788	0.0370762	5213/5214/2026	3
BP	GO:0042053	regulation of dopamine metabolic process	3/286	20/18800	0.00327854	0.0432788	0.0370762	6531/4929/3251	3
BP	GO:0042069	regulation of catecholamine metabolic process	3/286	20/18800	0.00327854	0.0432788	0.0370762	6531/4929/3251	3
BP	GO:0051480	regulation of cytosolic calcium ion concentration	13/286	356/18800	0.0032971	0.0432788	0.0370762	185/3708/2785/7070/6622/2890/3356/793/2281/6863/27020/100133941/3358	13
BP	GO:0072163	mesonephric epithelium development	6/286	95/18800	0.00329881	0.0432788	0.0370762	5979/5087/9500/10409/793/26585	6
BP	GO:0072164	mesonephric tubule development	6/286	95/18800	0.00329881	0.0432788	0.0370762	5979/5087/9500/10409/793/26585	6
BP	GO:0051208	sequestering of calcium ion	7/286	128/18800	0.00346648	0.0452981	0.0388061	3708/309/7070/6622/3356/2281/3358	7
BP	GO:0035418	protein localization to synapse	5/286	67/18800	0.00352186	0.0458398	0.0392701	27445/27065/5649/6616/3315	5
BP	GO:0071692	protein localization to extracellular region	13/286	359/18800	0.00353936	0.0458862	0.0393099	25924/27445/7857/5799/869/5122/5864/7447/5213/23400/43/2281/6616	13
BP	GO:1901888	regulation of cell junction assembly	9/286	201/18800	0.0037463	0.0482759	0.041357	23316/26050/7162/6585/54674/869/7070/6622/26585	9
BP	GO:0045109	intermediate filament organization	5/286	68/18800	0.00375503	0.0482759	0.041357	9118/10049/4744/4747/4741	5
BP	GO:0008090	retrograde axonal transport	3/286	21/18800	0.00378232	0.0482759	0.041357	50632/55860/4747	3
BP	GO:1900543	negative regulation of purine nucleotide metabolic process	3/286	21/18800	0.00378232	0.0482759	0.041357	55022/54541/26471	3
BP	GO:0050773	regulation of dendrite development	6/286	98/18800	0.00384768	0.0486213	0.041653	23316/5649/65981/6383/1996/7533	6
BP	GO:0060291	long-term synaptic potentiation	6/286	98/18800	0.00384768	0.0486213	0.041653	27065/6622/5649/793/27020/6616	6
BP	GO:0006091	generation of precursor metabolites and energy	16/286	494/18800	0.00385368	0.0486213	0.041653	2632/55022/1738/6622/54541/4719/3356/55847/5213/55753/5214/2821/2026/4698/26471/4190	16
CC	GO:0098793	presynapse	38/289	492/19594	5.73313e-17	2.20152e-14	1.61131e-14	6571/1644/6531/5100/7054/22987/93664/26059/51560/7162/9783/27445/9143/9899/23312/9114/6857/5799/51138/5122/273/8618/6622/8867/2890/6812/3356/5864/9892/22895/6853/793/1759/9900/4747/8851/27020/6616	38
CC	GO:0043025	neuronal cell body	32/289	482/19594	1.2353e-12	2.05441e-10	1.50364e-10	1644/6531/3752/5664/7054/5577/2596/5979/3759/9499/3897/5122/7070/6622/7345/2890/11075/9590/3356/23400/5909/23154/57468/793/2026/9900/8851/6863/22876/1996/54407/81539	32
CC	GO:0030133	transport vesicle	29/289	402/19594	1.95598e-12	2.05441e-10	1.50364e-10	6571/1644/7054/22987/149111/25924/3708/9143/9899/23312/9114/51760/6857/5799/51138/5122/273/6622/2890/5864/10484/23400/523/9892/22895/6853/29106/9900/6616	29
CC	GO:0150034	distal axon	24/289	270/19594	2.14001e-12	2.05441e-10	1.50364e-10	6571/2258/5664/7054/26059/7162/2596/9114/3897/5122/7070/6622/10409/8867/11075/3831/10381/5864/793/2026/4747/8851/6616/1996	24
CC	GO:0070382	exocytic vesicle	21/289	214/19594	8.14145e-12	6.25263e-10	4.57635e-10	6571/1644/7054/22987/9143/9899/23312/9114/51760/6857/5799/51138/273/6622/2890/5864/9892/22895/6853/9900/6616	21
CC	GO:0008021	synaptic vesicle	20/289	196/19594	1.26582e-11	8.10122e-10	5.92935e-10	6571/1644/7054/22987/9143/9899/23312/9114/6857/5799/51138/273/6622/2890/5864/9892/22895/6853/9900/6616	20
CC	GO:0030672	synaptic vesicle membrane	14/289	103/19594	3.58008e-10	1.71844e-08	1.25774e-08	6571/22987/9143/9899/23312/6857/5799/273/6622/2890/5864/22895/6853/9900	14
CC	GO:0099501	exocytic vesicle membrane	14/289	103/19594	3.58008e-10	1.71844e-08	1.25774e-08	6571/22987/9143/9899/23312/6857/5799/273/6622/2890/5864/22895/6853/9900	14
CC	GO:0030427	site of polarized growth	17/289	167/19594	4.70154e-10	2.00599e-08	1.4682e-08	2258/5664/26059/2596/3897/7070/6622/10409/11075/10129/3831/10381/2026/4747/8851/6616/1996	17
CC	GO:0030658	transport vesicle membrane	18/289	205/19594	1.60368e-09	6.15814e-08	4.50719e-08	6571/22987/149111/3708/9143/9899/23312/6857/5799/273/6622/2890/5864/10484/22895/6853/29106/9900	18
CC	GO:0030426	growth cone	16/289	161/19594	2.19563e-09	7.66474e-08	5.60988e-08	2258/5664/26059/2596/3897/7070/6622/10409/11075/3831/10381/2026/4747/8851/6616/1996	16
CC	GO:0097060	synaptic membrane	23/289	373/19594	8.55517e-09	2.73765e-07	2.00371e-07	6531/5100/3752/26059/149111/9783/9568/6857/869/27065/8867/2890/1142/6812/3356/9892/22895/2026/1759/2743/27020/2560/6616	23
CC	GO:0098978	glutamatergic synapse	20/289	319/19594	6.28979e-08	1.85791e-06	1.35982e-06	5100/93664/26059/5577/27445/6857/869/27065/8618/2890/6812/4885/3356/50632/793/1759/9900/27020/6616/1996	20
CC	GO:0044306	neuron projection terminus	12/289	129/19594	4.75844e-07	1.30517e-05	9.55265e-06	6571/7054/7162/2643/9114/6857/5122/6622/7345/8867/5864/793	12
CC	GO:0098982	GABA-ergic synapse	9/289	70/19594	8.63238e-07	2.20989e-05	1.61744e-05	3752/26059/2596/27445/793/9900/2743/27020/2560	9
CC	GO:0016471	vacuolar proton-transporting V-type ATPase complex	6/289	25/19594	1.3674e-06	3.28176e-05	2.40195e-05	9114/155066/51606/526/534/523	6
CC	GO:0033176	proton-transporting V-type ATPase complex	6/289	27/19594	2.2295e-06	5.03605e-05	3.68593e-05	9114/155066/51606/526/534/523	6
CC	GO:0098984	neuron to neuron synapse	18/289	347/19594	4.40075e-06	9.38826e-05	6.87134e-05	3752/2596/3708/2785/27445/23362/6857/81831/2890/119/9201/6853/793/4744/3631/8851/27020/2171	18
CC	GO:0099569	presynaptic cytoskeleton	4/289	10/19594	9.07669e-06	0.000175949	0.000128778	26059/9783/27445/4747	4
CC	GO:0042734	presynaptic membrane	11/289	143/19594	9.164e-06	0.000175949	0.000128778	6531/5100/26059/9783/6857/6812/3356/9892/1759/27020/6616	11
CC	GO:0000221	vacuolar proton-transporting V-type ATPase, V1 domain	4/289	11/19594	1.40978e-05	0.000254387	0.000186187	51606/526/534/523	4
CC	GO:0048786	presynaptic active zone	8/289	75/19594	1.45742e-05	0.000254387	0.000186187	26059/9783/27445/6812/5864/6853/9900/27020	8
CC	GO:0033180	proton-transporting V-type ATPase, V1 domain	4/289	12/19594	2.09014e-05	0.000348962	0.000255408	51606/526/534/523	4
CC	GO:0014069	postsynaptic density	16/289	318/19594	2.18726e-05	0.000349962	0.00025614	3752/2596/3708/2785/27445/23362/81831/2890/119/9201/6853/4744/3631/8851/27020/2171	16
CC	GO:0032279	asymmetric synapse	16/289	323/19594	2.64447e-05	0.000401065	0.000293543	3752/2596/3708/2785/27445/23362/81831/2890/119/9201/6853/4744/3631/8851/27020/2171	16
CC	GO:0005874	microtubule	19/289	435/19594	2.71554e-05	0.000401065	0.000293543	2258/65055/51143/7280/4976/54839/7277/3797/8867/3831/10381/10383/10128/25941/1780/203068/6990/1759/22920	19
CC	GO:0031045	dense core granule	5/289	26/19594	3.44012e-05	0.000475988	0.000348379	25924/7857/23312/6857/8618	5
CC	GO:1904115	axon cytoplasm	7/289	62/19594	3.47074e-05	0.000475988	0.000348379	4976/7345/50632/8120/55860/4747/3315	7
CC	GO:0043679	axon terminus	9/289	113/19594	4.5612e-05	0.000603966	0.000442048	6571/7054/7162/9114/5122/6622/8867/5864/793	9
CC	GO:0099572	postsynaptic specialization	16/289	341/19594	5.07065e-05	0.000649043	0.00047504	3752/2596/3708/2785/27445/23362/81831/2890/119/9201/6853/4744/3631/8851/27020/2171	16
CC	GO:0045211	postsynaptic membrane	14/289	271/19594	5.37021e-05	0.000665214	0.000486875	6531/5100/3752/149111/9568/869/27065/2890/1142/3356/22895/2743/27020/2560	14
CC	GO:0016469	proton-transporting two-sector ATPase complex	6/289	50/19594	9.00507e-05	0.00106709	0.000781008	9114/155066/51606/526/534/523	6
CC	GO:0098685	Schaffer collateral - CA1 synapse	7/289	72/19594	9.17026e-05	0.00106709	0.000781008	3708/9590/9118/6853/4744/4747/27020	7
CC	GO:0033178	proton-transporting two-sector ATPase complex, catalytic domain	4/289	20/19594	0.000186382	0.00210502	0.00154068	51606/526/534/523	4
CC	GO:0005775	vacuolar lumen	10/289	174/19594	0.000268528	0.00294614	0.0021563	27065/10383/47/23400/6383/203068/23646/55860/3920/2171	10
CC	GO:0098563	intrinsic component of synaptic vesicle membrane	5/289	40/19594	0.000290708	0.00310088	0.00226956	22987/6857/5864/6853/9900	5
CC	GO:1990351	transporter complex	16/289	399/19594	0.000307799	0.00319446	0.00233805	3763/3752/55800/149111/3759/3790/6328/2890/1142/4719/51761/3785/2281/4698/2743/2560	16
CC	GO:0120111	neuron projection cytoplasm	7/289	89/19594	0.000346731	0.00350381	0.00256447	4976/7345/50632/8120/55860/4747/3315	7
CC	GO:0034702	ion channel complex	13/289	294/19594	0.000450732	0.00440409	0.00322339	3763/3752/55800/149111/3759/3790/6328/2890/1142/3785/2281/2743/2560	13
CC	GO:0031594	neuromuscular junction	6/289	67/19594	0.000458759	0.00440409	0.00322339	5664/9143/43/9900/4747/8851	6
CC	GO:0098691	dopaminergic synapse	3/289	11/19594	0.000479952	0.00449516	0.00329004	6571/6531/1142	3
CC	GO:1902495	transmembrane transporter complex	15/289	377/19594	0.000512028	0.0046814	0.00342636	3763/3752/55800/149111/3759/3790/6328/2890/1142/4719/3785/2281/4698/2743/2560	15
CC	GO:0060198	clathrin-sculpted vesicle	3/289	12/19594	0.000632969	0.00565256	0.00413715	6571/6857/5864	3
CC	GO:0043195	terminal bouton	5/289	48/19594	0.000687234	0.00599768	0.00438975	6571/7054/8867/5864/793	5
CC	GO:0098992	neuronal dense core vesicle	3/289	13/19594	0.000813907	0.00694534	0.00508335	7857/23312/8618	3
CC	GO:0098857	membrane microdomain	13/289	327/19594	0.00120239	0.0100374	0.00734643	6531/5664/5577/5979/7070/119/6014/3356/6000/203068/2026/3920/100133941	13
CC	GO:0098831	presynaptic active zone cytoplasmic component	3/289	16/19594	0.00154229	0.0126008	0.00922263	26059/9783/27445	3
CC	GO:0099568	cytoplasmic region	11/289	259/19594	0.00168201	0.0133203	0.00974924	26059/9783/27445/4976/7345/50632/8120/55860/22920/4747/3315	11
CC	GO:0034703	cation channel complex	10/289	221/19594	0.00169973	0.0133203	0.00974924	3763/3752/55800/149111/3759/3790/6328/2890/3785/2281	10
CC	GO:0043198	dendritic shaft	4/289	36/19594	0.00188281	0.01446	0.0105834	5664/5577/149111/3356	4
CC	GO:0043204	perikaryon	8/289	153/19594	0.00199168	0.0149962	0.0109758	7054/2596/5122/23154/57468/2026/8851/1996	8
CC	GO:0045121	membrane raft	12/289	326/19594	0.00344443	0.0251324	0.0183946	6531/5664/5577/5979/7070/119/6014/3356/6000/203068/2026/100133941	12
CC	GO:0042827	platelet dense granule	3/289	21/19594	0.0034688	0.0251324	0.0183946	3708/10447/3920	3
CC	GO:0005868	cytoplasmic dynein complex	3/289	23/19594	0.00451971	0.0321401	0.0235236	51143/1780/6990	3
CC	GO:0030662	coated vesicle membrane	8/289	176/19594	0.00469116	0.0327528	0.023972	6571/149111/6857/25977/2890/5864/10484/8120	8
CC	GO:0008076	voltage-gated potassium channel complex	5/289	79/19594	0.00625133	0.0428663	0.0313742	3763/3752/3759/3790/3785	5
CC	GO:0060076	excitatory synapse	4/289	51/19594	0.00672322	0.0452933	0.0331505	6857/869/8867/2890	4
CC	GO:0030667	secretory granule membrane	11/289	312/19594	0.00685618	0.0453926	0.0332232	3708/51143/6857/5799/8618/6622/5864/29106/3920/6616/2171	11
MF	GO:0005200	structural constituent of cytoskeleton	11/281	104/18410	5.47126e-07	0.000303441	0.000248617	286/7280/7277/119/10381/10383/9118/203068/4744/4747/4741	11
MF	GO:0042625	ATPase-coupled ion transmembrane transporter activity	5/281	15/18410	2.11826e-06	0.000303441	0.000248617	9114/155066/51606/526/523	5
MF	GO:0044769	ATPase activity, coupled to transmembrane movement of ions, rotational mechanism	5/281	15/18410	2.11826e-06	0.000303441	0.000248617	9114/155066/51606/526/523	5
MF	GO:0046961	proton-transporting ATPase activity, rotational mechanism	5/281	15/18410	2.11826e-06	0.000303441	0.000248617	9114/155066/51606/526/523	5
MF	GO:0003924	GTPase activity	18/281	336/18410	4.45171e-06	0.000510166	0.000417992	51560/2785/5999/2643/7280/4976/7277/6014/10381/10383/10123/5864/5909/6000/203068/1759/54769/1917	18
MF	GO:0009678	pyrophosphate hydrolysis-driven proton transmembrane transporter activity	5/281	18/18410	5.82074e-06	0.00055588	0.000455447	9114/155066/51606/526/523	5
MF	GO:0098918	structural constituent of synapse	5/281	19/18410	7.80127e-06	0.000638589	0.000523213	26059/27445/9118/4744/4747	5
MF	GO:0046873	metal ion transmembrane transporter activity	19/281	428/18410	3.4215e-05	0.00231669	0.00189813	6571/6531/3763/3752/55800/3708/309/3759/3790/6328/10479/57419/7991/3785/57468/2281/6616/54407/81539	19
MF	GO:0022853	active ion transmembrane transporter activity	14/281	254/18410	3.81039e-05	0.00231669	0.00189813	6571/6531/9114/155066/51606/526/10479/28231/57419/23400/523/57468/54407/81539	14
MF	GO:0019001	guanyl nucleotide binding	18/281	401/18410	4.77414e-05	0.00231669	0.00189813	51560/2643/309/51143/7280/4976/7277/744/4830/6014/10381/10383/10123/5864/203068/1759/54769/1917	18
MF	GO:0032561	guanyl ribonucleotide binding	18/281	401/18410	4.77414e-05	0.00231669	0.00189813	51560/2643/309/51143/7280/4976/7277/744/4830/6014/10381/10383/10123/5864/203068/1759/54769/1917	18
MF	GO:0019829	ATPase-coupled cation transmembrane transporter activity	6/281	44/18410	5.19832e-05	0.00231669	0.00189813	9114/155066/51606/526/23400/523	6
MF	GO:0022804	active transmembrane transporter activity	18/281	404/18410	5.25603e-05	0.00231669	0.00189813	6571/6531/9114/155066/51606/526/10479/28231/57419/4719/23400/534/523/57468/10351/4698/54407/81539	18
MF	GO:0042626	ATPase-coupled transmembrane transporter activity	8/281	90/18410	7.00416e-05	0.0028667	0.00234876	9114/155066/51606/526/23400/534/523/10351	8
MF	GO:0005261	cation channel activity	16/281	345/18410	8.60391e-05	0.00328669	0.00269287	3763/3752/55800/3708/309/3759/3790/6328/2890/57419/1142/523/3785/57468/2281/6616	16
MF	GO:0005216	ion channel activity	18/281	442/18410	0.000163276	0.00584734	0.00479087	3763/3752/55800/3708/309/3759/3790/6328/2890/57419/1142/523/3785/57468/2281/2743/2560/6616	18
MF	GO:0015267	channel activity	19/281	489/18410	0.000196938	0.00609511	0.00499388	3763/3752/55800/3708/309/3759/3790/6328/2890/57419/1142/523/3785/57468/2281/2743/2560/6616/6563	19
MF	GO:0015399	primary active transmembrane transporter activity	10/281	162/18410	0.000197195	0.00609511	0.00499388	9114/155066/51606/526/4719/23400/534/523/10351/4698	10
MF	GO:0022803	passive transmembrane transporter activity	19/281	490/18410	0.000202107	0.00609511	0.00499388	3763/3752/55800/3708/309/3759/3790/6328/2890/57419/1142/523/3785/57468/2281/2743/2560/6616/6563	19
MF	GO:0022836	gated channel activity	15/281	340/18410	0.000245247	0.00687097	0.00562956	3763/3752/55800/3708/309/3759/3790/6328/2890/1142/3785/2281/2743/2560/6616	15
MF	GO:0005525	GTP binding	16/281	379/18410	0.000251816	0.00687097	0.00562956	51560/2643/309/7280/4976/7277/4830/6014/10381/10383/10123/5864/203068/1759/54769/1917	16
MF	GO:0034596	phosphatidylinositol phosphate 4-phosphatase activity	3/281	10/18410	0.000389945	0.00938502	0.00768939	8867/3631/22876	3
MF	GO:0015276	ligand-gated ion channel activity	9/281	145/18410	0.00039309	0.00938502	0.00768939	3763/3708/309/3759/2890/1142/2281/2743/2560	9
MF	GO:0022834	ligand-gated channel activity	9/281	145/18410	0.00039309	0.00938502	0.00768939	3763/3708/309/3759/2890/1142/2281/2743/2560	9
MF	GO:0015079	potassium ion transmembrane transporter activity	9/281	154/18410	0.000609376	0.0139669	0.0114434	3763/3752/3759/3790/10479/57419/3785/57468/6616	9
MF	GO:0030276	clathrin binding	6/281	69/18410	0.000642092	0.0141507	0.0115941	51760/6857/27065/60682/50632/9892	6
MF	GO:0044325	transmembrane transporter binding	8/281	127/18410	0.000746235	0.0158368	0.0129755	286/2258/3752/55800/9783/2281/27020/7533	8
MF	GO:0043176	amine binding	3/281	13/18410	0.000898323	0.017158	0.014058	6531/3356/3358	3
MF	GO:0070679	inositol 1,4,5 trisphosphate binding	3/281	13/18410	0.000898323	0.017158	0.014058	3708/22895/5334	3
MF	GO:0099186	structural constituent of postsynapse	3/281	13/18410	0.000898323	0.017158	0.014058	9118/4744/4747	3
MF	GO:0005096	GTPase activator activity	12/281	274/18410	0.00107611	0.0198907	0.016297	216/10451/5999/23158/7070/60682/398/23108/10484/5909/6000/5910	12
MF	GO:0099106	ion channel regulator activity	8/281	138/18410	0.00127981	0.0229166	0.0187762	2258/55800/3708/3790/27075/2281/6446/7533	8
MF	GO:0005544	calcium-dependent phospholipid binding	5/281	54/18410	0.00137253	0.023547	0.0192926	27445/309/51760/6857/22895	5
MF	GO:0016208	AMP binding	3/281	15/18410	0.0013972	0.023547	0.0192926	744/5213/5214	3
MF	GO:0016247	channel regulator activity	8/281	143/18410	0.00160596	0.0262918	0.0215416	2258/55800/3708/3790/27075/2281/6446/7533	8
MF	GO:0015377	cation:chloride symporter activity	3/281	16/18410	0.00170033	0.0270635	0.0221738	6571/6531/57468	3
MF	GO:0015631	tubulin binding	14/281	376/18410	0.00200451	0.0307839	0.0252221	2258/65055/4976/55521/3797/6622/11075/10123/10128/1780/1759/4744/8851/4741	14
MF	GO:0052745	inositol phosphate phosphatase activity	3/281	17/18410	0.00204152	0.0307839	0.0252221	8867/3631/22876	3
MF	GO:0048306	calcium-dependent protein binding	6/281	87/18410	0.00215365	0.0310783	0.0254633	309/6857/11075/6853/6616/6283	6
MF	GO:0015081	sodium ion transmembrane transporter activity	8/281	150/18410	0.00216952	0.0310783	0.0254633	6571/6531/55800/6328/10479/57419/54407/81539	8
MF	GO:0000287	magnesium ion binding	10/281	222/18410	0.00224632	0.0313936	0.0257216	3251/4976/5631/5495/6622/64781/4830/51761/2026/6733	10
MF	GO:0005249	voltage-gated potassium channel activity	6/281	91/18410	0.00270285	0.0368745	0.0302123	3763/3752/3759/3790/3785/6616	6
MF	GO:0043014	alpha-tubulin binding	4/281	39/18410	0.0028706	0.0382524	0.0313412	55521/6622/10123/8851	4
MF	GO:0017080	sodium channel regulator activity	4/281	40/18410	0.00315181	0.0410451	0.0336294	2258/55800/6446/7533	4
MF	GO:0017075	syntaxin-1 binding	3/281	20/18410	0.00330881	0.0421321	0.0345199	6857/6812/6616	3
MF	GO:0015296	anion:cation symporter activity	3/281	21/18410	0.0038171	0.0475477	0.0389571	6571/6531/57468	3
