# Supplementary material for: Novel diagnostic biomarkers related to immune infiltration in Parkinson’s disease by bioinformatics analysis
Source: Front Neurosci. 2023 Jan 26;17:1083928. doi: 10.3389/fnins.2023.1083928 (PMC9909419; doi:10.3389/fnins.2023.1083928)
Supplement: Supplementary file 6 [file Table_5.XLSX]

## Sheet: SYT1
Supplementary Table S5 |Gene Set Enrichment Analyses identification of SYT1-related signaling pathways
ID	Description	setSize	enrichmentScore	NES	pvalue	p.adjust	qvalues	rank	leading_edge	core_enrichment	gene_name
hsa05012	Parkinson disease	199	0.40702	1.75601	0.000148017	0.000148017	0.0029647	1551	tags=22%, list=13%, signal=20%	6571/6531/7054/7280/7345/5601/10381/816/2774/23516/4698/3708/64837/1813/7384/7277/2778/6622/203068/291/5718/54205/10383/818/5566/7416/3831/4719/4729/3800/27429/5709/5602/4706/7317/7419/9377/6389/10382/6263/4137/10376/55669/1537	SLC18A2/SLC6A3/TH/TUBB2A/UCHL1/MAPK9/TUBB3/CAMK2B/GNAL/SLC39A14/NDUFA5/ITPR1/KLC2/DRD2/UQCRC1/TUBA4A/GNAS/SNCA/TUBB/SLC25A4/PSMD12/CYCS/TUBB4B/CAMK2G/PRKACA/VDAC1/KLC1/NDUFS1/NDUFV2/KIF5C/HTRA2/PSMD3/MAPK10/NDUFAB1/UBA1/VDAC3/COX5A/SDHA/TUBB4A/RYR3/MAPT/TUBA1B/MFN1/CYC1
hsa05017	Spinocerebellar ataxia	130	0.508083	2.07629	0.000156986	0.000156986	0.0029647	2230	tags=35%, list=19%, signal=29%	5332/2890/2911/5601/3752/4976/489/8503/6712/3708/5291/23236/291/5718/54205/488/7416/9821/10000/10939/5709/5602/8408/30849/5579/7419/55062/9698/9519/25814/2902/2259/5290/23152/6511/8678/2891/10105/23130/293/26100/5682/7436/23369/6261/4217	PLCB4/GRIA1/GRM1/MAPK9/KCND3/OPA1/ATP2A3/PIK3R3/SPTBN2/ITPR1/PIK3CB/PLCB1/SLC25A4/PSMD12/CYCS/ATP2A2/VDAC1/RB1CC1/AKT3/AFG3L2/PSMD3/MAPK10/ULK1/PIK3R4/PRKCB/VDAC3/WIPI1/PUM1/TBPL1/ATXN10/GRIN1/FGF14/PIK3CA/CIC/SLC1A6/BECN1/GRIA2/PPIF/ATG2A/SLC25A6/WIPI2/PSMA1/VLDLR/PUM2/RYR1/MAP3K5
hsa04261	Adrenergic signaling in cardiomyocytes	129	0.449393	1.83397	0.000157604	0.000157604	0.0029647	1655	tags=31%, list=14%, signal=27%	5332/185/784/6543/491/816/9254/489/2778/5527/115/23236/55799/5518/493/488/107/818/5566/5515/482/5594/10000/481/476/55012/11069/782/483/10368/5502/5526/6262/183/490/5595/1386/477/5500/114	PLCB4/AGTR1/CACNB3/SLC8A2/ATP2B2/CAMK2B/CACNA2D2/ATP2A3/GNAS/PPP2R5C/ADCY9/PLCB1/CACNA2D3/PPP2R1A/ATP2B4/ATP2A2/ADCY1/CAMK2G/PRKACA/PPP2CA/ATP1B2/MAPK1/AKT3/ATP1B1/ATP1A1/PPP2R3C/RAPGEF4/CACNB1/ATP1B3/CACNG3/PPP1R1A/PPP2R5B/RYR2/AGT/ATP2B1/MAPK3/ATF2/ATP1A2/PPP1CB/ADCY8
hsa04723	Retrograde endocannabinoid signaling	118	0.48792	1.9649	0.00015921	0.00015921	0.0029647	1171	tags=23%, list=10%, signal=21%	57084/5332/2890/2911/2785/3763/5601/1268/2554/4698/3708/2566/2560/10681/2915/2775/115/23236/107/5566/4719/5594/2558/4729/5602/4706/5579	SLC17A6/PLCB4/GRIA1/GRM1/GNG3/KCNJ6/MAPK9/CNR1/GABRA1/NDUFA5/ITPR1/GABRG2/GABRB1/GNB5/GRM5/GNAO1/ADCY9/PLCB1/ADCY1/PRKACA/NDUFS1/MAPK1/GABRA5/NDUFV2/MAPK10/NDUFAB1/PRKCB
hsa04728	Dopaminergic synapse	115	0.599233	2.40344	0.000160102	0.000160102	0.0029647	1043	tags=27%, list=9%, signal=25%	50632/1644/6571/5332/6531/7054/2890/2785/3763/6323/5601/816/2774/5530/3708/5532/1813/10681/2778/2775/5527/23236/5518/818/5566/5515/10000/408/3800/55012/5602	CALY/DDC/SLC18A2/PLCB4/SLC6A3/TH/GRIA1/GNG3/KCNJ6/SCN1A/MAPK9/CAMK2B/GNAL/PPP3CA/ITPR1/PPP3CB/DRD2/GNB5/GNAS/GNAO1/PPP2R5C/PLCB1/PPP2R1A/CAMK2G/PRKACA/PPP2CA/AKT3/ARRB1/KIF5C/PPP2R3C/MAPK10
hsa04724	Glutamatergic synapse	94	0.53433	2.07168	0.000164663	0.000164663	0.0029647	1761	tags=34%, list=15%, signal=29%	57084/5332/2890/2744/2911/2785/27165/22941/5530/3708/5532/10681/2915/2778/2775/6505/115/23236/107/5566/5594/7220/81539/5579/2782/54407/5595/2902/6511/114/2752/2891	SLC17A6/PLCB4/GRIA1/GLS/GRM1/GNG3/GLS2/SHANK2/PPP3CA/ITPR1/PPP3CB/GNB5/GRM5/GNAS/GNAO1/SLC1A1/ADCY9/PLCB1/ADCY1/PRKACA/MAPK1/TRPC1/SLC38A1/PRKCB/GNB1/SLC38A2/MAPK3/GRIN1/SLC1A6/ADCY8/GLUL/GRIA2
hsa04727	GABAergic synapse	76	0.602989	2.2559	0.000168011	0.000168011	0.0029647	1406	tags=36%, list=12%, signal=31%	9568/57468/2571/2744/2785/3763/2572/27165/2550/2554/2566/6529/2560/10681/23710/2775/115/107/5566/10243/6538/2558/81539/5579/18/2782/54407	GABBR2/SLC12A5/GAD1/GLS/GNG3/KCNJ6/GAD2/GLS2/GABBR1/GABRA1/GABRG2/SLC6A1/GABRB1/GNB5/GABARAPL1/GNAO1/ADCY9/ADCY1/PRKACA/GPHN/SLC6A11/GABRA5/SLC38A1/PRKCB/ABAT/GNB1/SLC38A2
hsa05230	Central carbon metabolism in cancer	66	0.566418	2.0712	0.000170155	0.000170155	0.0029647	1881	tags=42%, list=16%, signal=36%	5979/2744/5214/3939/27165/4916/8503/5315/3098/3815/5213/1956/3845/5291/3945/5604/5594/10000/3091/5223/9997/5595/3418/5290/3099/5162/4914/5160	RET/GLS/PFKP/LDHA/GLS2/NTRK3/PIK3R3/PKM/HK1/KIT/PFKM/EGFR/KRAS/PIK3CB/LDHB/MAP2K1/MAPK1/AKT3/HIF1A/PGAM1/SCO2/MAPK3/IDH2/PIK3CA/HK2/PDHB/NTRK1/PDHA1
hsa04721	Synaptic vesicle cycle	64	0.72056	2.62389	0.000170474	0.000170474	0.0029647	964	tags=41%, list=8%, signal=38%	6857/57084/1759/6616/6571/6531/5864/6812/26052/526/523/534/6844/51606/6529/1213/6505/6536/155066/8218/1173/527/6538/8775/535/9114	SYT1/SLC17A6/DNM1/SNAP25/SLC18A2/SLC6A3/RAB3A/STXBP1/DNM3/ATP6V1B2/ATP6V1A/ATP6V1G2/VAMP2/ATP6V1H/SLC6A1/CLTC/SLC1A1/SLC6A9/ATP6V0E2/CLTCL1/AP2M1/ATP6V0C/SLC6A11/NAPA/ATP6V0A1/ATP6V0D1
hsa04720	Long-term potentiation	61	0.589558	2.12736	0.000171939	0.000171939	0.0029647	1761	tags=39%, list=15%, signal=34%	5332/2890/2911/816/5530/3708/5532/3845/2915/6197/23236/107/818/5566/5604/5594/2033/5579/5502/5595/2902/5500/114/2891	PLCB4/GRIA1/GRM1/CAMK2B/PPP3CA/ITPR1/PPP3CB/KRAS/GRM5/RPS6KA3/PLCB1/ADCY1/CAMK2G/PRKACA/MAP2K1/MAPK1/EP300/PRKCB/PPP1R1A/MAPK3/GRIN1/PPP1CB/ADCY8/GRIA2
hsa04929	GnRH secretion	59	0.573385	2.05444	0.000172712	0.000172712	0.0029647	1581	tags=34%, list=13%, signal=29%	9568/5332/3763/2550/8503/3708/3845/5291/23236/8911/5604/5594/10000/408/7220/8913/5579/5595/5290/3765	GABBR2/PLCB4/KCNJ6/GABBR1/PIK3R3/ITPR1/KRAS/PIK3CB/PLCB1/CACNA1I/MAP2K1/MAPK1/AKT3/ARRB1/TRPC1/CACNA1G/PRKCB/MAPK3/PIK3CA/KCNJ9
hsa04961	Endocrine and other factor-regulated calcium reabsorption	49	0.627438	2.17561	0.000174551	0.000174551	0.0029647	1604	tags=49%, list=14%, signal=42%	1759/5332/793/26052/6543/491/1213/2778/115/23236/493/5566/8218/1173/482/481/476/5579/483/490/1212/477/161/8766	DNM1/PLCB4/CALB1/DNM3/SLC8A2/ATP2B2/CLTC/GNAS/ADCY9/PLCB1/ATP2B4/PRKACA/CLTCL1/AP2M1/ATP1B2/ATP1B1/ATP1A1/PRKCB/ATP1B3/ATP2B1/CLTB/ATP1A2/AP2A2/RAB11A
hsa04730	Long-term depression	51	0.594411	2.07659	0.000174642	0.000174642	0.0029647	779	tags=27%, list=7%, signal=26%	5332/2890/2911/3708/3845/10842/10672/2778/2775/23236/5518/5515/5604/5594	PLCB4/GRIA1/GRM1/ITPR1/KRAS/PPP1R17/GNA13/GNAS/GNAO1/PLCB1/PPP2R1A/PPP2CA/MAP2K1/MAPK1
hsa00020	Citrate cycle (TCA cycle)	30	0.697636	2.17818	0.000182548	0.000182548	0.0029647	1881	tags=57%, list=16%, signal=48%	55753/4190/47/3419/8803/1431/1737/50/1738/5105/48/6389/4191/3418/3421/5162/5160	OGDHL/MDH1/ACLY/IDH3A/SUCLA2/CS/DLAT/ACO2/DLD/PCK1/ACO1/SDHA/MDH2/IDH2/IDH3G/PDHB/PDHA1
hsa04061	Viral protein interaction with cytokine and cytokine receptor	86	-0.474325	-1.97926	0.000251762	0.000251762	0.00329806	2617	tags=43%, list=22%, signal=34%	6372/3586/6373/8794/3559/1230/2833/8809/8740/6352/8793/7133/8743/1232/6346/6375/6362/3569/3588/8764/3587/1435/6363/29949/6347/6366/6368/3576/8795/7132/1235/27178/5197/57007/6351/7852/6387	CXCL6/IL10/CXCL11/TNFRSF10C/IL2RA/CCR1/CXCR3/IL18R1/TNFSF14/CCL5/TNFRSF10D/TNFRSF1B/TNFSF10/CCR3/CCL1/XCL1/CCL18/IL6/IL10RB/TNFRSF14/IL10RA/CSF1/CCL19/IL19/CCL2/CCL21/CCL23/CXCL8/TNFRSF10B/TNFRSF1A/CCR6/IL37/PF4V1/ACKR3/CCL4/CXCR4/CXCL12
hsa03010	Ribosome	98	-0.463576	-1.98102	0.000256148	0.000256148	0.00329806	3281	tags=57%, list=28%, signal=42%	4736/6128/6194/6181/6156/25873/6201/9045/6204/6161/79590/51121/6193/6234/6132/6160/6209/6229/6164/6167/64963/6143/6136/6233/6176/2197/6170/6123/6217/6218/9553/6203/6155/11224/6166/7311/6188/6146/6227/51021/140801/6135/6141/6152/6168/29074/6223/6235/6165/51023/6210/6171/6169/6159/6205/6157	RPL10A/RPL6/RPS6/RPLP2/RPL30/RPL36/RPS7/RPL14/RPS10/RPL32/MRPL24/RPL26L1/RPS5/RPS28/RPL8/RPL31/RPS15/RPS24/RPL34/RPL37/MRPS11/RPL19/RPL12/RPS27A/RPLP1/FAU/RPL39/RPL3L/RPS16/RPS17/MRPL33/RPS9/RPL27/RPL35/RPL36AL/UBA52/RPS3/RPL22/RPS21/MRPS16/RPL10L/RPL11/RPL18/RPL24/RPL37A/MRPL18/RPS19/RPS29/RPL35A/MRPS18C/RPS15A/RPL41/RPL38/RPL29/RPS11/RPL27A
hsa05171	Coronavirus disease - COVID-19	200	-0.372568	-1.77159	0.00030722	0.00030722	0.00329806	3718	tags=54%, list=32%, signal=38%	6230/1839/3454/2165/3441/4599/5970/6175/733/6191/727/10379/4736/6128/6194/3572/6181/4312/6156/25873/6201/4792/1536/4940/735/9045/6204/730/3593/6161/629/57506/5603/2244/51121/731/6193/6234/6132/4314/6160/6209/2266/3440/6229/6164/59272/3725/834/6167/5336/6143/6136/6233/6176/2197/4600/6300/6170/5295/6123/6217/6218/4790/3445/3569/1636/6203/4142/6155/11224/6166/3661/7311/3551/6188/4938/6146/5335/5648/…	RPS25/HBEGF/IFNAR1/F13B/IFNA4/MX1/RELA/RPLP0/C8G/RPS4X/C5/IRF9/RPL10A/RPL6/RPS6/IL6ST/RPLP2/MMP1/RPL30/RPL36/RPS7/NFKBIA/CYBB/OAS3/C9/RPL14/RPS10/C7/IL12B/RPL32/CFB/MAVS/MAPK13/FGB/RPL26L1/C8A/RPS5/RPS28/RPL8/MMP3/RPL31/RPS15/FGG/IFNA2/RPS24/RPL34/ACE2/JUN/CASP1/RPL37/PLCG2/RPL19/RPL12/RPS27A/RPLP1/FAU/MX2/MAPK12/RPL39/PIK3R1/RPL3L/RPS16/RPS17/NFKB1/IFNA8/IL6/ACE/RPS9/MAS1/RPL27/RPL35/RPL36AL/IRF…
hsa04725	Cholinergic synapse	96	0.482333	1.87838	0.000328192	0.000328192	0.00329806	1171	tags=24%, list=10%, signal=22%	5332/3785/2785/43/3763/816/8503/3708/10681/3845/2775/5291/115/23236/107/818/5566/5604/5594/10000/1133/3786/5579	PLCB4/KCNQ2/GNG3/ACHE/KCNJ6/CAMK2B/PIK3R3/ITPR1/GNB5/KRAS/GNAO1/PIK3CB/ADCY9/PLCB1/ADCY1/CAMK2G/PRKACA/MAP2K1/MAPK1/AKT3/CHRM5/KCNQ3/PRKCB
hsa04922	Glucagon signaling pathway	88	0.517835	1.98532	0.000331126	0.000331126	0.00329806	1881	tags=34%, list=16%, signal=29%	5332/5214/3939/816/5530/5315/3708/5213/5532/31/2778/23236/3945/818/5566/10000/5105/51422/10891/5837/2033/5571/5223/150094/1386/5257/5162/2997/5531/5160	PLCB4/PFKP/LDHA/CAMK2B/PPP3CA/PKM/ITPR1/PFKM/PPP3CB/ACACA/GNAS/PLCB1/LDHB/CAMK2G/PRKACA/AKT3/PCK1/PRKAG2/PPARGC1A/PYGM/EP300/PRKAG1/PGAM1/SIK1/ATF2/PHKB/PDHB/GYS1/PPP4C/PDHA1
hsa04925	Aldosterone synthesis and secretion	83	0.518857	1.97039	0.000332502	0.000332502	0.00329806	1655	tags=34%, list=14%, signal=29%	5332/185/491/816/3708/2778/4929/115/23236/57172/8911/493/107/818/5566/482/481/476/8913/3777/5579/483/183/490/3949/1386/477/114	PLCB4/AGTR1/ATP2B2/CAMK2B/ITPR1/GNAS/NR4A2/ADCY9/PLCB1/CAMK1G/CACNA1I/ATP2B4/ADCY1/CAMK2G/PRKACA/ATP1B2/ATP1B1/ATP1A1/CACNA1G/KCNK3/PRKCB/ATP1B3/AGT/ATP2B1/LDLR/ATF2/ATP1A2/ADCY8
hsa04540	Gap junction	80	0.515663	1.94392	0.000334392	0.000334392	0.00329806	1706	tags=36%, list=14%, signal=31%	5332/3358/2911/7280/10381/3708/1813/7277/1956/3845/2915/2778/203068/115/23236/10383/107/5566/5604/5594/3356/6654/5579/10382/5595/10376/1453/114/5154	PLCB4/HTR2C/GRM1/TUBB2A/TUBB3/ITPR1/DRD2/TUBA4A/EGFR/KRAS/GRM5/GNAS/TUBB/ADCY9/PLCB1/TUBB4B/ADCY1/PRKACA/MAP2K1/MAPK1/HTR2A/SOS1/PRKCB/TUBB4A/MAPK3/TUBA1B/CSNK1D/ADCY8/PDGFA
hsa04911	Insulin secretion	74	0.542391	2.01747	0.000337553	0.000337553	0.00329806	1843	tags=36%, list=16%, signal=31%	6616/5332/885/5864/27445/116/816/6844/2778/115/23236/107/818/5566/482/481/476/11069/5579/483/6262/1386/477/114/6804/9699/1131	SNAP25/PLCB4/CCK/RAB3A/PCLO/ADCYAP1/CAMK2B/VAMP2/GNAS/ADCY9/PLCB1/ADCY1/CAMK2G/PRKACA/ATP1B2/ATP1B1/ATP1A1/RAPGEF4/PRKCB/ATP1B3/RYR2/ATF2/ATP1A2/ADCY8/STX1A/RIMS2/CHRM3
hsa00562	Inositol phosphate metabolism	65	0.539859	1.96932	0.000340774	0.000340774	0.00329806	2013	tags=40%, list=17%, signal=33%	5332/8867/22876/8395/5297/23396/3631/4952/9110/5291/55361/23236/7167/22908/9896/3612/9562/8776/80271/5290/56623/8396/27124/10423/23007/8897	PLCB4/SYNJ1/INPP5F/PIP5K1B/PI4KA/PIP5K1C/INPP4A/OCRL/MTMR4/PIK3CB/PI4K2A/PLCB1/TPI1/SACM1L/FIG4/IMPA1/MINPP1/MTMR1/ITPKC/PIK3CA/INPP5E/PIP4K2B/INPP5J/CDIPT/PLCH1/MTMR3
hsa05031	Amphetamine addiction	57	0.575447	2.0459	0.000348129	0.000348129	0.00329806	688	tags=19%, list=6%, signal=18%	1644/6571/6531/7054/2890/816/5530/5532/2778/818/5566	DDC/SLC18A2/SLC6A3/TH/GRIA1/CAMK2B/PPP3CA/PPP3CB/GNAS/CAMK2G/PRKACA
hsa00250	Alanine, aspartate and glutamate metabolism	28	0.653463	2.00801	0.000368732	0.000368732	0.00335352	2066	tags=61%, list=18%, signal=50%	2571/2744/2572/2805/27165/440/7915/2673/790/18/2806/2746/2747/435/2752/56954/445	GAD1/GLS/GAD2/GOT1/GLS2/ASNS/ALDH5A1/GFPT1/CAD/ABAT/GOT2/GLUD1/GLUD2/ASL/GLUL/NIT2/ASS1
hsa04024	cAMP signaling pathway	189	0.387085	1.6606	0.0004455	0.0004455	0.00378002	1583	tags=24%, list=13%, signal=21%	9568/6750/2890/7432/5141/5601/491/116/2550/10451/816/489/8503/1813/2778/5291/115/493/488/107/818/5566/5604/482/5594/10000/9475/481/476/5144/11069/2033/5602/483/5727/10021/22800/4886/6262/490/5595/2902/5021/477/5290/5500	GABBR2/SST/GRIA1/VIP/PDE4A/MAPK9/ATP2B2/ADCYAP1/GABBR1/VAV3/CAMK2B/ATP2A3/PIK3R3/DRD2/GNAS/PIK3CB/ADCY9/ATP2B4/ATP2A2/ADCY1/CAMK2G/PRKACA/MAP2K1/ATP1B2/MAPK1/AKT3/ROCK2/ATP1B1/ATP1A1/PDE4D/RAPGEF4/EP300/MAPK10/ATP1B3/PTCH1/HCN4/RRAS2/NPY1R/RYR2/ATP2B1/MAPK3/GRIN1/OXTR/ATP1A2/PIK3CA/PPP1CB
hsa01200	Carbon metabolism	100	0.480223	1.88127	0.000489476	0.000489476	0.00378002	1881	tags=37%, list=16%, signal=31%	55753/5214/2026/2805/4190/5315/3098/5213/2821/3419/10873/8803/1431/4199/5230/5631/7167/1737/50/1738/10993/48/5223/230/226/6389/2806/2746/4191/283871/2747/3418/3421/3099/5162/2023/5160	OGDHL/PFKP/ENO2/GOT1/MDH1/PKM/HK1/PFKM/GPI/IDH3A/ME3/SUCLA2/CS/ME1/PGK1/PRPS1/TPI1/DLAT/ACO2/DLD/SDS/ACO1/PGAM1/ALDOC/ALDOA/SDHA/GOT2/GLUD1/MDH2/PGP/GLUD2/IDH2/IDH3G/HK2/PDHB/ENO1/PDHA1
hsa04726	Serotonergic synapse	95	0.473231	1.83985	0.000492611	0.000492611	0.00378002	900	tags=20%, list=8%, signal=19%	1644/6571/5332/3358/2785/3763/3751/3708/2560/10681/3845/2778/2775/23236/5566/5604/5594/3356/7220	DDC/SLC18A2/PLCB4/HTR2C/GNG3/KCNJ6/KCND2/ITPR1/GABRB1/GNB5/KRAS/GNAS/GNAO1/PLCB1/PRKACA/MAP2K1/MAPK1/HTR2A/TRPC1
hsa05034	Alcoholism	86	0.495239	1.89194	0.000497512	0.000497512	0.00378002	1583	tags=27%, list=13%, signal=23%	1644/6571/6531/7054/2785/1813/10681/3845/2778/2775/4915/5566/2030/5604/5594/6654/10013/2782/5595/2902/1386/5569/5500	DDC/SLC18A2/SLC6A3/TH/GNG3/DRD2/GNB5/KRAS/GNAS/GNAO1/NTRK2/PRKACA/SLC29A1/MAP2K1/MAPK1/SOS1/HDAC6/GNB1/MAPK3/GRIN1/ATF2/PKIA/PPP1CB
hsa04713	Circadian entrainment	83	0.49082	1.86392	0.000498753	0.000498753	0.00378002	1761	tags=33%, list=15%, signal=28%	5332/2890/2785/3763/116/816/3708/10681/2778/2775/115/23236/8911/107/818/5566/5594/8913/5579/2782/6262/5595/2902/6263/3765/114/2891	PLCB4/GRIA1/GNG3/KCNJ6/ADCYAP1/CAMK2B/ITPR1/GNB5/GNAS/GNAO1/ADCY9/PLCB1/CACNA1I/ADCY1/CAMK2G/PRKACA/MAPK1/CACNA1G/PRKCB/GNB1/RYR2/MAPK3/GRIN1/RYR3/KCNJ9/ADCY8/GRIA2
hsa05030	Cocaine addiction	41	0.5903	1.96998	0.00053286	0.00053286	0.00390824	688	tags=22%, list=6%, signal=21%	1644/6571/6531/7054/8851/1020/1813/2778/5566	DDC/SLC18A2/SLC6A3/TH/CDK5R1/CDK5/DRD2/GNAS/PRKACA
hsa04070	Phosphatidylinositol signaling system	83	0.480944	1.82642	0.000665004	0.000665004	0.00472503	967	tags=23%, list=8%, signal=21%	5332/8867/22876/8395/5297/23396/3631/4952/23262/8503/3708/9110/5291/55361/23236/1608/22908/3612/8760	PLCB4/SYNJ1/INPP5F/PIP5K1B/PI4KA/PIP5K1C/INPP4A/OCRL/PPIP5K2/PIK3R3/ITPR1/MTMR4/PIK3CB/PI4K2A/PLCB1/DGKG/SACM1L/IMPA1/CDS2
hsa04910	Insulin signaling pathway	124	0.431581	1.75107	0.000952079	0.000952079	0.00654863	2575	tags=41%, list=22%, signal=32%	5575/5601/5577/8503/3098/2194/3845/31/5291/5566/5604/5594/10000/5105/3667/5590/2002/6654/51422/5584/10891/8569/5837/5571/5602/2319/7249/5509/5573/6720/5595/6009/5257/5290/5500/5792/3099/2997/51806/5260/23265/3632/6199/23433/10603/3265/7248/5834/801/53358/207	PRKAR1B/MAPK9/PRKAR2B/PIK3R3/HK1/FASN/KRAS/ACACA/PIK3CB/PRKACA/MAP2K1/MAPK1/AKT3/PCK1/IRS1/PRKCZ/ELK1/SOS1/PRKAG2/PRKCI/PPARGC1A/MKNK1/PYGM/PRKAG1/MAPK10/FLOT2/TSC2/PPP1R3D/PRKAR1A/SREBF1/MAPK3/RHEB/PHKB/PIK3CA/PPP1CB/PTPRF/HK2/GYS1/CALML5/PHKG1/EXOC7/INPP5A/RPS6KB2/RHOQ/SH2B2/HRAS/TSC1/PYGB/CALM1/SHC3/AKT1
hsa00190	Oxidative phosphorylation	85	0.466915	1.78175	0.000993542	0.000993542	0.00654863	2010	tags=32%, list=17%, signal=27%	526/523/534/1353/4698/51606/7384/54205/155066/4719/527/4729/535/9114/1352/4706/9550/9377/6389/528/479/1537/51382/27068/537/1345/4705	ATP6V1B2/ATP6V1A/ATP6V1G2/COX11/NDUFA5/ATP6V1H/UQCRC1/CYCS/ATP6V0E2/NDUFS1/ATP6V0C/NDUFV2/ATP6V0A1/ATP6V0D1/COX10/NDUFAB1/ATP6V1G1/COX5A/SDHA/ATP6V1C1/ATP12A/CYC1/ATP6V1D/PPA2/ATP6AP1/COX6C/NDUFA10
hsa05032	Morphine addiction	76	0.4743	1.77445	0.00100806	0.00100806	0.00654863	979	tags=24%, list=8%, signal=22%	9568/2785/3763/5141/2550/2554/2566/2560/10681/2778/2775/115/107/5566/408/2558/5144/8622	GABBR2/GNG3/KCNJ6/PDE4A/GABBR1/GABRA1/GABRG2/GABRB1/GNB5/GNAS/GNAO1/ADCY9/ADCY1/PRKACA/ARRB1/GABRA5/PDE4D/PDE8B
hsa04919	Thyroid hormone signaling pathway	112	0.435348	1.73762	0.00112504	0.00112504	0.00710552	1567	tags=28%, list=13%, signal=24%	5332/10231/5214/489/8503/5213/3845/5291/23236/5208/488/5566/5604/482/5594/10000/481/3091/476/2033/3685/7249/5579/483/53919/9968/5595/6009/6772/477/5290	PLCB4/RCAN2/PFKP/ATP2A3/PIK3R3/PFKM/KRAS/PIK3CB/PLCB1/PFKFB2/ATP2A2/PRKACA/MAP2K1/ATP1B2/MAPK1/AKT3/ATP1B1/HIF1A/ATP1A1/EP300/ITGAV/TSC2/PRKCB/ATP1B3/SLCO1C1/MED12/MAPK3/RHEB/STAT1/ATP1A2/PIK3CA
hsa04114	Oocyte meiosis	97	0.440892	1.71867	0.00131255	0.00131255	0.00806575	2070	tags=33%, list=18%, signal=27%	7533/816/5530/3708/5532/22849/5527/115/6197/996/5518/107/818/5566/5515/7531/5604/5594/7534/7529/25847/9232/5526/5595/891/5500/114/5528/898/9700/51806/27330	YWHAH/CAMK2B/PPP3CA/ITPR1/PPP3CB/CPEB3/PPP2R5C/ADCY9/RPS6KA3/CDC27/PPP2R1A/ADCY1/CAMK2G/PRKACA/PPP2CA/YWHAE/MAP2K1/MAPK1/YWHAZ/YWHAB/ANAPC13/PTTG1/PPP2R5B/MAPK3/CCNB1/PPP1CB/ADCY8/PPP2R5D/CCNE1/ESPL1/CALML5/RPS6KA6
hsa05415	Diabetic cardiomyopathy	159	0.382702	1.60507	0.00137636	0.00137636	0.00823527	2034	tags=28%, list=17%, signal=23%	5332/185/5601/816/489/8503/4698/7384/5291/23236/2673/291/488/818/7416/5164/4719/10000/3667/5590/4729/5602/5166/4706/5579/7419/9377/6389/4087/6262/183/2936/1537/5290/5500/7040/5162/2997/10105/5160/293/1345/4705/1509	PLCB4/AGTR1/MAPK9/CAMK2B/ATP2A3/PIK3R3/NDUFA5/UQCRC1/PIK3CB/PLCB1/GFPT1/SLC25A4/ATP2A2/CAMK2G/VDAC1/PDK2/NDUFS1/AKT3/IRS1/PRKCZ/NDUFV2/MAPK10/PDK4/NDUFAB1/PRKCB/VDAC3/COX5A/SDHA/SMAD2/RYR2/AGT/GSR/CYC1/PIK3CA/PPP1CB/TGFB1/PDHB/GYS1/PPIF/PDHA1/SLC25A6/COX6C/NDUFA10/CTSD
hsa04935	Growth hormone synthesis, secretion and action	109	0.428075	1.70213	0.00144393	0.00144393	0.00841804	1655	tags=25%, list=14%, signal=21%	6750/5332/5601/6416/8503/3708/3845/2778/5291/115/23236/107/5566/5604/5594/10000/3667/6654/2033/5602/5579/3486/5595/6772/1386/5290/114	SST/PLCB4/MAPK9/MAP2K4/PIK3R3/ITPR1/KRAS/GNAS/PIK3CB/ADCY9/PLCB1/ADCY1/PRKACA/MAP2K1/MAPK1/AKT3/IRS1/SOS1/EP300/MAPK10/PRKCB/IGFBP3/MAPK3/STAT1/ATF2/PIK3CA/ADCY8
hsa04921	Oxytocin signaling pathway	126	0.412576	1.67837	0.00158278	0.00158278	0.00899685	1655	tags=28%, list=14%, signal=24%	5332/3763/784/816/5530/9254/3708/5532/1956/3845/2778/2775/115/23236/57172/55799/107/818/5566/5604/5594/9475/2002/51422/5571/782/5579/10368/6262/5595/6263/5021/3765/5500/114	PLCB4/KCNJ6/CACNB3/CAMK2B/PPP3CA/CACNA2D2/ITPR1/PPP3CB/EGFR/KRAS/GNAS/GNAO1/ADCY9/PLCB1/CAMK1G/CACNA2D3/ADCY1/CAMK2G/PRKACA/MAP2K1/MAPK1/ROCK2/ELK1/PRKAG2/PRKAG1/CACNB1/PRKCB/CACNG3/RYR2/MAPK3/RYR3/OXTR/KCNJ9/PPP1CB/ADCY8
hsa04964	Proximal tubule bicarbonate reclamation	21	0.664617	1.90206	0.00171789	0.00171789	0.00933479	1555	tags=62%, list=13%, signal=54%	2744/27165/4190/8671/482/5105/358/481/476/483/2746/2747/477	GLS/GLS2/MDH1/SLC4A4/ATP1B2/PCK1/AQP1/ATP1B1/ATP1A1/ATP1B3/GLUD1/GLUD2/ATP1A2
hsa04742	Taste transduction	60	0.497277	1.78744	0.0017325	0.0017325	0.00933479	799	tags=15%, list=7%, signal=14%	9568/5332/6328/2911/2550/2554/23236/5566/2558	GABBR2/PLCB4/SCN3A/GRM1/GABBR1/GABRA1/PLCB1/PRKACA/GABRA5
hsa00220	Arginine biosynthesis	17	0.696732	1.89496	0.0017654	0.0017654	0.00933479	2066	tags=59%, list=18%, signal=49%	2744/2805/27165/384/2806/2746/2747/435/2752/445	GLS/GOT1/GLS2/ARG2/GOT2/GLUD1/GLUD2/ASL/GLUL/ASS1
hsa04927	Cortisol synthesis and secretion	56	0.506149	1.79446	0.00208514	0.00208514	0.0107749	1655	tags=30%, list=14%, signal=26%	5332/185/5087/3708/2778/115/23236/8911/107/5566/8622/8913/3777/183/3949/1386/114	PLCB4/AGTR1/PBX1/ITPR1/GNAS/ADCY9/PLCB1/CACNA1I/ADCY1/PRKACA/PDE8B/CACNA1G/KCNK3/AGT/LDLR/ATF2/ADCY8
hsa04144	Endocytosis	199	0.354772	1.53059	0.00236827	0.00236827	0.0117683	2513	tags=34%, list=21%, signal=27%	273/1759/10193/6456/26052/8395/23396/56904/440073/30845/1956/9829/8723/1213/60682/8027/26056/8218/1173/9922/408/9525/55040/5590/5584/10564/3800/10097/10552/10096/11059/23327/4087/1212/3949/57180/161/5868/998/8766/55680/9230/8853/116987/9101/10254/377/378/55737/57132/1175/2060/8729/7189/5869/830/829/22841/11311/5156/10015/2869/7879/3265/5878/5338/10565/57403	AMPH/DNM1/RNF41/SH3GL2/DNM3/PIP5K1B/PIP5K1C/SH3GLB2/IQSEC3/EHD3/EGFR/DNAJC6/SNX4/CLTC/SMAP1/STAM/RAB11FIP5/CLTCL1/AP2M1/IQSEC1/ARRB1/VPS4B/EPN3/PRKCZ/PRKCI/ARFGEF2/KIF5C/ACTR2/ARPC1A/ACTR3/WWP1/NEDD4L/SMAD2/CLTB/LDLR/ACTR3B/AP2A2/RAB5A/CDC42/RAB11A/RUFY2/RAB11B/ASAP2/AGAP1/USP8/STAM2/ARF3/ARF4/VPS35/CHMP1B/AP2S1/EPS15/GBF1/TRAF6/RAB5B/CAPZA2/CAPZA1/RAB11FIP2/VPS45/PDGFRA/PDCD6IP/GRK5/RAB7A/HRAS/R…
hsa05150	Staphylococcus aureus infection	71	-0.423551	-1.70066	0.00241721	0.00241721	0.0117683	4194	tags=55%, list=36%, signal=36%	3886/3112/4153/1669/713/3109/3883/25984/727/3111/3689/3113/5340/3859/2204/629/3586/2266/2358/3683/3426/3115/1671/3868/3858/5724/3866/5648/3880/3122/54474/1828/6404/1675/3119/9103/2213/2212/3075	KRT35/HLA-DOB/MBL2/DEFA4/C1QB/HLA-DMB/KRT33A/KRT23/C5/HLA-DOA/ITGB2/HLA-DPA1/PLG/KRT12/FCAR/CFB/IL10/FGG/FPR2/ITGAL/CFI/HLA-DPB1/DEFA6/KRT16/KRT10/PTAFR/KRT15/MASP1/KRT19/HLA-DRA/KRT20/DSG1/SELPLG/CFD/HLA-DQB1/FCGR2C/FCGR2B/FCGR2A/CFH
hsa00010	Glycolysis / Gluconeogenesis	58	0.494779	1.76539	0.00243267	0.00243267	0.0117683	1215	tags=31%, list=10%, signal=28%	5214/2026/3939/5315/3098/5213/2821/5230/3945/7167/1737/1738/5105/5236/5223/230/9562/226	PFKP/ENO2/LDHA/PKM/HK1/PFKM/GPI/PGK1/LDHB/TPI1/DLAT/DLD/PCK1/PGM1/PGAM1/ALDOC/MINPP1/ALDOA
hsa04973	Carbohydrate digestion and absorption	36	0.557101	1.81545	0.00268577	0.00268577	0.012722	1722	tags=42%, list=15%, signal=36%	5332/8503/3098/5291/23236/482/10000/481/476/5579/483/6518/477/5290/3099	PLCB4/PIK3R3/HK1/PIK3CB/PLCB1/ATP1B2/AKT3/ATP1B1/ATP1A1/PRKCB/ATP1B3/SLC2A5/ATP1A2/PIK3CA/HK2
hsa05033	Nicotine addiction	31	0.578023	1.81847	0.00291971	0.00291971	0.0132918	799	tags=19%, list=7%, signal=18%	57084/2890/2554/2566/2560/2558	SLC17A6/GRIA1/GABRA1/GABRG2/GABRB1/GABRA5
hsa01230	Biosynthesis of amino acids	61	0.481058	1.73585	0.00292297	0.00292297	0.0132918	2066	tags=44%, list=18%, signal=37%	5214/2026/2805/440/5315/5213/3419/384/1431/5230/5631/7167/50/10993/48/5223/230/226/2806/27430/3418/3421/435/2752/2023/586/445	PFKP/ENO2/GOT1/ASNS/PKM/PFKM/IDH3A/ARG2/CS/PGK1/PRPS1/TPI1/ACO2/SDS/ACO1/PGAM1/ALDOC/ALDOA/GOT2/MAT2B/IDH2/IDH3G/ASL/GLUL/ENO1/BCAT1/ASS1
hsa04926	Relaxin signaling pathway	114	0.407505	1.63198	0.00352338	0.00352338	0.015708	1667	tags=27%, list=14%, signal=24%	5332/2785/5601/1910/6416/8503/1956/10681/3845/2778/2775/5291/115/23236/107/5566/5604/5594/10000/408/5590/6654/5602/7422/4087/2782/5595/1386/5290/114/7040	PLCB4/GNG3/MAPK9/EDNRB/MAP2K4/PIK3R3/EGFR/GNB5/KRAS/GNAS/GNAO1/PIK3CB/ADCY9/PLCB1/ADCY1/PRKACA/MAP2K1/MAPK1/AKT3/ARRB1/PRKCZ/SOS1/MAPK10/VEGFA/SMAD2/GNB1/MAPK3/ATF2/PIK3CA/ADCY8/TGFB1
hsa04072	Phospholipase D signaling pathway	131	0.388768	1.58947	0.00378012	0.00378012	0.0165285	1466	tags=23%, list=12%, signal=20%	1759/5332/2911/185/26052/8395/23396/8503/3815/1956/3845/10672/2915/2778/5291/115/23236/107/1608/5604/5594/10000/6654/11069/7249/22800/183/5595/6009/5899	DNM1/PLCB4/GRM1/AGTR1/DNM3/PIP5K1B/PIP5K1C/PIK3R3/KIT/EGFR/KRAS/GNA13/GRM5/GNAS/PIK3CB/ADCY9/PLCB1/ADCY1/DGKG/MAP2K1/MAPK1/AKT3/SOS1/RAPGEF4/TSC2/RRAS2/AGT/MAPK3/RHEB/RALB
hsa04962	Vasopressin-regulated water reabsorption	39	0.542011	1.79518	0.00425985	0.00425985	0.0182746	1693	tags=38%, list=14%, signal=33%	1780/398/6844/361/51164/2778/115/5566/1778/51143/1639/10540/5868/8766/9230	DYNC1I1/ARHGDIG/VAMP2/AQP4/DCTN4/GNAS/ADCY9/PRKACA/DYNC1H1/DYNC1LI1/DCTN1/DCTN2/RAB5A/RAB11A/RAB11B
hsa04012	ErbB signaling pathway	78	0.440152	1.6519	0.00485762	0.00485762	0.0204531	1567	tags=26%, list=13%, signal=22%	5601/816/6416/8503/1956/3845/5291/5063/818/5604/5594/10000/2002/6654/3084/5602/5579/2066/5595/5290	MAPK9/CAMK2B/MAP2K4/PIK3R3/EGFR/KRAS/PIK3CB/PAK3/CAMK2G/MAP2K1/MAPK1/AKT3/ELK1/SOS1/NRG1/MAPK10/PRKCB/ERBB4/MAPK3/PIK3CA
hsa04912	GnRH signaling pathway	80	0.436553	1.64569	0.00501588	0.00501588	0.0207355	1171	tags=24%, list=10%, signal=22%	5332/5601/816/6416/3708/1956/3845/2778/115/23236/107/818/5566/5604/5594/2002/6654/5602/5579	PLCB4/MAPK9/CAMK2B/MAP2K4/ITPR1/EGFR/KRAS/GNAS/ADCY9/PLCB1/ADCY1/CAMK2G/PRKACA/MAP2K1/MAPK1/ELK1/SOS1/MAPK10/PRKCB
hsa04140	Autophagy - animal	121	0.389124	1.57131	0.00558838	0.00558838	0.0226896	2633	tags=43%, list=22%, signal=34%	5601/8503/3708/9110/3845/23710/5291/664/1612/5566/9821/5515/5604/5594/10000/3667/3091/5602/8408/30849/7249/22800/55062/10533/81631/5595/6009/23192/5861/5290/55255/8678/10670/23130/8897/1509/26100/10010/64798/7189/54541/64419/6199/7879/3265/79065/7248/5580/9451/207/29110/5605	MAPK9/PIK3R3/ITPR1/MTMR4/KRAS/GABARAPL1/PIK3CB/BNIP3/DAPK1/PRKACA/RB1CC1/PPP2CA/MAP2K1/MAPK1/AKT3/IRS1/HIF1A/MAPK10/ULK1/PIK3R4/TSC2/RRAS2/WIPI1/ATG7/MAP1LC3B/MAPK3/RHEB/ATG4B/RAB1A/PIK3CA/WDR41/BECN1/RRAGA/ATG2A/MTMR3/CTSD/WIPI2/TANK/DEPTOR/TRAF6/DDIT4/MTMR14/RPS6KB2/RAB7A/HRAS/ATG9A/TSC1/PRKCD/EIF2AK3/AKT1/TBK1/MAP2K2
hsa04150	mTOR signaling pathway	126	0.385843	1.56963	0.00585628	0.00585628	0.0233602	2817	tags=41%, list=24%, signal=32%	526/523/534/8503/51606/3845/5291/6197/81929/5604/5594/10000/3667/6654/7472/6249/1147/8649/55615/7480/8408/7249/5579/9550/23175/528/9663/5595/6009/5290/4040/51382/10670/8322/27330/64798/1857/54541/7124/6199/3265/7248/529/92335/207/2887/5605/2535/8321/51719/7471/2475	ATP6V1B2/ATP6V1A/ATP6V1G2/PIK3R3/ATP6V1H/KRAS/PIK3CB/RPS6KA3/SEH1L/MAP2K1/MAPK1/AKT3/IRS1/SOS1/WNT2/CLIP1/CHUK/LAMTOR3/PRR5/WNT10B/ULK1/TSC2/PRKCB/ATP6V1G1/LPIN1/ATP6V1C1/LPIN2/MAPK3/RHEB/PIK3CA/LRP6/ATP6V1D/RRAGA/FZD4/RPS6KA6/DEPTOR/DVL3/DDIT4/TNF/RPS6KB2/HRAS/TSC1/ATP6V1E1/STRADA/AKT1/GRB10/MAP2K2/FZD2/FZD1/CAB39/WNT1/MTOR
hsa01210	2-Oxocarboxylic acid metabolism	13	0.696257	1.77015	0.00688398	0.00688398	0.0269628	2055	tags=69%, list=17%, signal=57%	2805/3419/1431/50/48/2806/3418/3421/586	GOT1/IDH3A/CS/ACO2/ACO1/GOT2/IDH2/IDH3G/BCAT1
hsa04260	Cardiac muscle contraction	70	0.439204	1.61584	0.00699659	0.00699659	0.0269628	1751	tags=29%, list=15%, signal=24%	784/6543/10479/9254/489/7384/55799/488/482/481/476/782/483/10368/9377/6262/1537/477/444/3270	CACNB3/SLC8A2/SLC9A6/CACNA2D2/ATP2A3/UQCRC1/CACNA2D3/ATP2A2/ATP1B2/ATP1B1/ATP1A1/CACNB1/ATP1B3/CACNG3/COX5A/RYR2/CYC1/ATP1A2/ASPH/HRC
hsa03040	Spliceosome	101	-0.356293	-1.5296	0.00803942	0.00803942	0.0304652	3485	tags=46%, list=30%, signal=32%	9092/9984/9775/8175/83443/51340/6625/10946/5093/6432/10285/10084/25949/10450/22827/6631/6633/84991/1665/6634/57819/1659/8896/56259/6426/10465/24148/6628/3306/3178/26121/3183/22938/6636/51690/57187/27258/9129/22985/3305/6637/9785/55660/29896/55119/3310	SART1/THOC1/EIF4A3/SF3A2/SF3B5/CRNKL1/SNRNP70/SF3A3/PCBP1/SRSF7/SMNDC1/PQBP1/SYF2/PPIE/PUF60/SNRPC/SNRPD2/RBM17/DHX15/SNRPD3/LSM2/DHX8/BUD31/CTNNBL1/SRSF1/PPIH/PRPF6/SNRPB/HSPA2/HNRNPA1/PRPF31/HNRNPC/SNW1/SNRPF/LSM7/THOC2/LSM3/PRPF3/ACIN1/HSPA1L/SNRPG/DHX38/PRPF40A/TRA2A/PRPF38B/HSPA6
hsa04915	Estrogen signaling pathway	117	0.381879	1.5356	0.00893997	0.00893997	0.0333224	892	tags=17%, list=8%, signal=16%	9568/5332/2911/3763/2550/8503/3708/1956/3845/2778/2775/5291/115/23236/107/5566/5604/5594/10000/6654	GABBR2/PLCB4/GRM1/KCNJ6/GABBR1/PIK3R3/ITPR1/EGFR/KRAS/GNAS/GNAO1/PIK3CB/ADCY9/PLCB1/ADCY1/PRKACA/MAP2K1/MAPK1/AKT3/SOS1
hsa04972	Pancreatic secretion	86	0.409984	1.56625	0.0102819	0.0102819	0.0377062	1670	tags=28%, list=14%, signal=24%	5332/885/491/489/3708/2778/115/23236/493/488/107/8671/482/7220/481/476/5579/483/6262/490/477/8766/114/5646	PLCB4/CCK/ATP2B2/ATP2A3/ITPR1/GNAS/ADCY9/PLCB1/ATP2B4/ATP2A2/ADCY1/SLC4A4/ATP1B2/TRPC1/ATP1B1/ATP1A1/PRKCB/ATP1B3/RYR2/ATP2B1/ATP1A2/RAB11A/ADCY8/PRSS3
hsa04672	Intestinal immune network for IgA production	40	-0.456793	-1.62479	0.0105505	0.0105505	0.0380768	4112	tags=60%, list=35%, signal=39%	23308/6370/3112/3565/3558/940/3109/29851/3695/3111/3113/942/57379/3586/3115/3676/3569/3600/959/3122/608/3119/7852/6387	ICOSLG/CCL25/HLA-DOB/IL4/IL2/CD28/HLA-DMB/ICOS/ITGB7/HLA-DOA/HLA-DPA1/CD86/AICDA/IL10/HLA-DPB1/ITGA4/IL6/IL15/CD40LG/HLA-DRA/TNFRSF17/HLA-DQB1/CXCR4/CXCL12
hsa05110	Vibrio cholerae infection	42	0.486479	1.63347	0.0127389	0.0127389	0.0452565	1653	tags=40%, list=14%, signal=35%	526/523/534/51606/2778/55176/115/155066/5566/527/535/9114/11014/9550/528/10945/51382	ATP6V1B2/ATP6V1A/ATP6V1G2/ATP6V1H/GNAS/SEC61A2/ADCY9/ATP6V0E2/PRKACA/ATP6V0C/ATP6V0A1/ATP6V0D1/KDELR2/ATP6V1G1/ATP6V1C1/KDELR1/ATP6V1D
hsa05210	Colorectal cancer	82	0.406507	1.54056	0.0136054	0.0136054	0.0467796	1838	tags=30%, list=16%, signal=26%	5601/26060/8503/1647/1956/3845/5291/10912/54205/10297/5604/5594/324/10000/6654/5602/4087/5595/5899/1643/5290/6934/7040/4616/83439	MAPK9/APPL1/PIK3R3/GADD45A/EGFR/KRAS/PIK3CB/GADD45G/CYCS/APC2/MAP2K1/MAPK1/APC/AKT3/SOS1/MAPK10/SMAD2/MAPK3/RALB/DDB2/PIK3CA/TCF7L2/TGFB1/GADD45B/TCF7L1
hsa05212	Pancreatic cancer	74	0.417664	1.55354	0.0138397	0.0138397	0.0467796	2575	tags=42%, list=22%, signal=33%	5601/8503/1647/1956/3845/5291/10912/5604/5594/10000/1147/5602/7422/4087/5595/6772/5899/1643/5290/998/7040/4616/8517/1871/5879/6199/5898/5881/5338/2064/207	MAPK9/PIK3R3/GADD45A/EGFR/KRAS/PIK3CB/GADD45G/MAP2K1/MAPK1/AKT3/CHUK/MAPK10/VEGFA/SMAD2/MAPK3/STAT1/RALB/DDB2/PIK3CA/CDC42/TGFB1/GADD45B/IKBKG/E2F3/RAC1/RPS6KB2/RALA/RAC3/PLD2/ERBB2/AKT1
hsa04750	Inflammatory mediator regulation of TRP channels	82	0.405478	1.53666	0.0139373	0.0139373	0.0467796	1171	tags=21%, list=10%, signal=19%	5332/3358/5601/816/8503/3708/2778/5291/115/23236/107/818/5566/3356/5602/41/5579	PLCB4/HTR2C/MAPK9/CAMK2B/PIK3R3/ITPR1/GNAS/PIK3CB/ADCY9/PLCB1/ADCY1/CAMK2G/PRKACA/HTR2A/MAPK10/ASIC1/PRKCB
hsa04066	HIF-1 signaling pathway	102	0.385962	1.51699	0.0139906	0.0139906	0.0467796	1881	tags=30%, list=16%, signal=26%	5214/2026/3939/816/8503/3098/5213/1956/5291/5230/7099/3945/818/5604/5594/10000/3091/8569/2033/230/7422/5579/226/8453/285/5595/5290/3099/5162/2023/5160	PFKP/ENO2/LDHA/CAMK2B/PIK3R3/HK1/PFKM/EGFR/PIK3CB/PGK1/TLR4/LDHB/CAMK2G/MAP2K1/MAPK1/AKT3/HIF1A/MKNK1/EP300/ALDOC/VEGFA/PRKCB/ALDOA/CUL2/ANGPT2/MAPK3/PIK3CA/HK2/PDHB/ENO1/PDHA1
hsa01250	Biosynthesis of nucleotide sugars	30	0.533059	1.66433	0.0142388	0.0142388	0.0469195	1752	tags=43%, list=15%, signal=37%	3098/2821/55907/2673/6675/5236/54187/2592/7360/80146/4351/3099/2582	HK1/GPI/CMAS/GFPT1/UAP1/PGM1/NANS/GALT/UGP2/UXS1/MPI/HK2/GALE
hsa04152	AMPK signaling pathway	105	0.383105	1.51227	0.0149109	0.0149109	0.0476158	1772	tags=28%, list=15%, signal=24%	5214/8503/2194/5213/31/5291/5527/3156/5518/5208/5515/10000/5105/3667/51422/10891/55012/5571/8408/7249/8900/6720/5526/6009/5862/5290/9230/2997/5528	PFKP/PIK3R3/FASN/PFKM/ACACA/PIK3CB/PPP2R5C/HMGCR/PPP2R1A/PFKFB2/PPP2CA/AKT3/PCK1/IRS1/PRKAG2/PPARGC1A/PPP2R3C/PRKAG1/ULK1/TSC2/CCNA1/SREBF1/PPP2R5B/RHEB/RAB2A/PIK3CA/RAB11B/GYS1/PPP2R5D
hsa04928	Parathyroid hormone synthesis, secretion and action	95	0.391556	1.52231	0.0149425	0.0149425	0.0476158	1655	tags=25%, list=14%, signal=22%	5332/5141/3708/1956/10672/2778/4929/115/23236/107/5566/5604/5594/408/5144/9826/5579/3727/4209/846/5595/1386/4040/114	PLCB4/PDE4A/ITPR1/EGFR/GNA13/GNAS/NR4A2/ADCY9/PLCB1/ADCY1/PRKACA/MAP2K1/MAPK1/ARRB1/PDE4D/ARHGEF11/PRKCB/JUND/MEF2D/CASR/MAPK3/ATF2/LRP6/ADCY8
hsa04979	Cholesterol metabolism	45	-0.427333	-1.56067	0.0152214	0.0152214	0.0476158	2725	tags=40%, list=23%, signal=31%	706/27329/3931/948/341/6272/6646/1581/64240/9388/338/3988/26119/19/4864/4036/1593/29116	TSPO/ANGPTL3/LCAT/CD36/APOC1/SORT1/SOAT1/CYP7A1/ABCG5/LIPG/APOB/LIPA/LDLRAP1/ABCA1/NPC1/LRP2/CYP27A1/MYLIP
hsa04960	Aldosterone-regulated sodium reabsorption	34	0.513342	1.65384	0.0152878	0.0152878	0.0476158	1567	tags=41%, list=13%, signal=36%	8503/3845/5291/482/5594/3667/481/476/5579/483/23327/5595/477/5290	PIK3R3/KRAS/PIK3CB/ATP1B2/MAPK1/IRS1/ATP1B1/ATP1A1/PRKCB/ATP1B3/NEDD4L/MAPK3/ATP1A2/PIK3CA
hsa05213	Endometrial cancer	55	0.444121	1.56889	0.0158343	0.0158343	0.0483729	1926	tags=36%, list=16%, signal=31%	8503/1647/1956/3845/5291/10912/10297/5604/5594/324/10000/2002/6654/5595/1643/5290/6934/4616/83439/1496	PIK3R3/GADD45A/EGFR/KRAS/PIK3CB/GADD45G/APC2/MAP2K1/MAPK1/APC/AKT3/ELK1/SOS1/MAPK3/DDB2/PIK3CA/TCF7L2/GADD45B/TCF7L1/CTNNA2
hsa04392	Hippo signaling pathway - multiple species	21	-0.540068	-1.63497	0.0159563	0.0159563	0.0483729	3035	tags=57%, list=26%, signal=43%	9770/8994/8642/79981/6788/25937/10413/79633/9113/54798/7005/7004	RASSF2/LIMD1/DCHS1/FRMD1/STK3/WWTR1/YAP1/FAT4/LATS1/DCHS2/TEAD3/TEAD4
hsa04022	cGMP-PKG signaling pathway	145	0.345909	1.43538	0.017965	0.017965	0.05373	1897	tags=26%, list=16%, signal=22%	5332/185/6543/491/1910/5530/489/3708/5532/10672/115/23236/291/493/488/107/7416/5604/482/5594/10000/3667/9475/481/476/483/7419/4209/490/5595/1386/477/5500/114/10105/154/293/4205	PLCB4/AGTR1/SLC8A2/ATP2B2/EDNRB/PPP3CA/ATP2A3/ITPR1/PPP3CB/GNA13/ADCY9/PLCB1/SLC25A4/ATP2B4/ATP2A2/ADCY1/VDAC1/MAP2K1/ATP1B2/MAPK1/AKT3/IRS1/ROCK2/ATP1B1/ATP1A1/ATP1B3/VDAC3/MEF2D/ATP2B1/MAPK3/ATF2/ATP1A2/PPP1CB/ADCY8/PPIF/ADRB2/SLC25A6/MEF2A
hsa04934	Cushing syndrome	133	0.352854	1.44648	0.0181961	0.0181961	0.05373	1862	tags=25%, list=16%, signal=21%	5332/185/816/5087/3708/1956/2778/115/23236/8911/107/818/5566/10297/5604/5594/324/4221/7472/8622/8913/3777/7480/183/5595/3949/1386/6934/114/9070/83439/9101/898	PLCB4/AGTR1/CAMK2B/PBX1/ITPR1/EGFR/GNAS/ADCY9/PLCB1/CACNA1I/ADCY1/CAMK2G/PRKACA/APC2/MAP2K1/MAPK1/APC/MEN1/WNT2/PDE8B/CACNA1G/KCNK3/WNT10B/AGT/MAPK3/LDLR/ATF2/TCF7L2/ADCY8/ASH2L/TCF7L1/USP8/CCNE1
hsa04714	Thermogenesis	164	0.336996	1.41891	0.0190259	0.0190259	0.0553195	3067	tags=41%, list=26%, signal=31%	1268/51412/1353/4698/6604/7384/3845/2778/115/6197/6597/107/5566/4719/2182/6654/51422/4729/10891/1352/5571/29078/4706/7249/57104/9377/6389/6009/1386/1537/114/23305/1345/4705/10818/27330/2260/4217/6199/4714/5346/3265/7248/1349/1337/2181/7386/65260/4717/90993/4712/109/9167/2180/2475/6595/51780/4696/1374/5567/4704/1339/27089/2885/51103/4697/108	CNR1/ACTL6B/COX11/NDUFA5/SMARCD3/UQCRC1/KRAS/GNAS/ADCY9/RPS6KA3/SMARCA4/ADCY1/PRKACA/NDUFS1/ACSL4/SOS1/PRKAG2/NDUFV2/PPARGC1A/COX10/PRKAG1/NDUFAF4/NDUFAB1/TSC2/PNPLA2/COX5A/SDHA/RHEB/ATF2/CYC1/ADCY8/ACSL6/COX6C/NDUFA10/FRS2/RPS6KA6/FGFR1/MAP3K5/RPS6KB2/NDUFB8/PLIN1/HRAS/TSC1/COX7B/COX6A1/ACSL3/UQCRFS1/COA7/NDUFC1/CREB3L1/NDUFB6/ADCY3/COX7A2L/ACSL1/MTOR/SMARCA2/KDM3B/NDUFA3/CPT1A/PRKACB/NDUFA9/COX…
hsa05214	Glioma	68	0.412576	1.51382	0.019221	0.019221	0.0553195	2633	tags=41%, list=22%, signal=32%	816/8503/1647/1956/3845/5291/10912/57172/818/5604/5594/10000/6654/5579/5595/1643/5290/5154/4616/51806/1871/8536/5156/3265/801/53358/207/5605	CAMK2B/PIK3R3/GADD45A/EGFR/KRAS/PIK3CB/GADD45G/CAMK1G/CAMK2G/MAP2K1/MAPK1/AKT3/SOS1/PRKCB/MAPK3/DDB2/PIK3CA/PDGFA/GADD45B/CALML5/E2F3/CAMK1/PDGFRA/HRAS/CALM1/SHC3/AKT1/MAP2K2
hsa00620	Pyruvate metabolism	40	0.481455	1.60232	0.0200284	0.0200284	0.0567921	2162	tags=40%, list=18%, signal=33%	3939/4190/5315/31/10873/4199/3945/1737/1738/5105/2739/4191/5162/5160/10327/97	LDHA/MDH1/PKM/ACACA/ME3/ME1/LDHB/DLAT/DLD/PCK1/GLO1/MDH2/PDHB/PDHA1/AKR1A1/ACYP1
hsa04916	Melanogenesis	86	0.392106	1.49795	0.0202322	0.0202322	0.0567921	1171	tags=21%, list=10%, signal=19%	5332/816/1910/3815/3845/2778/2775/115/23236/107/818/5566/5604/5594/7472/2033/7480/5579	PLCB4/CAMK2B/EDNRB/KIT/KRAS/GNAS/GNAO1/ADCY9/PLCB1/ADCY1/CAMK2G/PRKACA/MAP2K1/MAPK1/WNT2/EP300/WNT10B/PRKCB
hsa05340	Primary immunodeficiency	33	-0.46364	-1.57897	0.0207035	0.0207035	0.0574063	2820	tags=42%, list=24%, signal=32%	326/57379/973/3932/5897/5994/3543/64421/6890/5896/959/915/930/7374	AIRE/AICDA/CD79A/LCK/RAG2/RFXAP/IGLL1/DCLRE1C/TAP1/RAG1/CD40LG/CD3D/CD19/UNG
hsa05320	Autoimmune thyroid disease	46	-0.41207	-1.51299	0.0236564	0.0236564	0.0641076	5433	tags=76%, list=46%, signal=41%	7173/3134/941/958/3451/3567/3448/3133/7038/3002/3106/3112/3565/3558/940/3109/3441/5551/3111/355/1493/3113/942/3135/1081/3586/3105/3440/3115/3445/959/7253/3122/3119/3439	TPO/HLA-F/CD80/CD40/IFNA17/IL5/IFNA14/HLA-E/TG/GZMB/HLA-B/HLA-DOB/IL4/IL2/CD28/HLA-DMB/IFNA4/PRF1/HLA-DOA/FAS/CTLA4/HLA-DPA1/CD86/HLA-G/CGA/IL10/HLA-A/IFNA2/HLA-DPB1/IFNA8/CD40LG/TSHR/HLA-DRA/HLA-DQB1/IFNA1
hsa00030	Pentose phosphate pathway	25	0.540623	1.61596	0.0236842	0.0236842	0.0641076	1215	tags=28%, list=10%, signal=25%	5214/5213/2821/5631/5236/230/226	PFKP/PFKM/GPI/PRPS1/PGM1/ALDOC/ALDOA
hsa04914	Progesterone-mediated oocyte maturation	76	0.395396	1.47925	0.0240255	0.0240255	0.0642665	1655	tags=26%, list=14%, signal=23%	5601/8503/22849/3845/5291/115/6197/996/107/5566/5604/5594/10000/25847/5602/8900/5595/891/5290/114	MAPK9/PIK3R3/CPEB3/KRAS/PIK3CB/ADCY9/RPS6KA3/CDC27/ADCY1/PRKACA/MAP2K1/MAPK1/AKT3/ANAPC13/MAPK10/CCNA1/MAPK3/CCNB1/PIK3CA/ADCY8
hsa00270	Cysteine and methionine metabolism	41	0.466759	1.5577	0.0262877	0.0262877	0.0692576	2442	tags=44%, list=21%, signal=35%	2805/3939/4190/3945/2730/10993/6611/1036/2806/4191/27430/23382/6723/1786/586/10768/875/58478	GOT1/LDHA/MDH1/LDHB/GCLM/SDS/SMS/CDO1/GOT2/MDH2/MAT2B/AHCYL2/SRM/DNMT1/BCAT1/AHCYL1/CBS/ENOPH1
hsa04371	Apelin signaling pathway	117	0.354214	1.42435	0.0265006	0.0265006	0.0692576	2393	tags=34%, list=20%, signal=28%	5332/2785/185/6543/3708/10681/3845/10672/115/23236/107/5566/5604/5594/10000/51422/10891/5571/30849/22800/4209/4087/2782/6262/81631/5595/6263/114/8678/4205/2790/51806/56848/10014/6261/2783/6199/182/5346/3265	PLCB4/GNG3/AGTR1/SLC8A2/ITPR1/GNB5/KRAS/GNA13/ADCY9/PLCB1/ADCY1/PRKACA/MAP2K1/MAPK1/AKT3/PRKAG2/PPARGC1A/PRKAG1/PIK3R4/RRAS2/MEF2D/SMAD2/GNB1/RYR2/MAP1LC3B/MAPK3/RYR3/ADCY8/BECN1/MEF2A/GNG10/CALML5/SPHK2/HDAC5/RYR1/GNB2/RPS6KB2/JAG1/PLIN1/HRAS
hsa05216	Thyroid cancer	35	0.483369	1.56521	0.0269736	0.0269736	0.0696925	1838	tags=37%, list=16%, signal=31%	5979/1647/3845/10912/8030/5604/5594/5595/1643/6934/4616/4914/83439	RET/GADD45A/KRAS/GADD45G/CCDC6/MAP2K1/MAPK1/MAPK3/DDB2/TCF7L2/GADD45B/NTRK1/TCF7L1
hsa04971	Gastric acid secretion	63	0.40825	1.4826	0.0288741	0.0288741	0.0737647	1176	tags=24%, list=10%, signal=22%	6750/5332/816/3708/2778/115/23236/107/818/5566/482/481/476/5579/483	SST/PLCB4/CAMK2B/ITPR1/GNAS/ADCY9/PLCB1/ADCY1/CAMK2G/PRKACA/ATP1B2/ATP1B1/ATP1A1/PRKCB/ATP1B3
hsa00520	Amino sugar and nucleotide sugar metabolism	40	0.462635	1.53969	0.0306629	0.0306629	0.0774641	2011	tags=40%, list=17%, signal=33%	3098/2821/55907/2673/6675/5236/54187/51706/2592/7360/80146/4351/3099/2582/51167/5973	HK1/GPI/CMAS/GFPT1/UAP1/PGM1/NANS/CYB5R1/GALT/UGP2/UXS1/MPI/HK2/GALE/CYB5R4/RENBP
hsa04640	Hematopoietic cell lineage	90	-0.329597	-1.38747	0.0364927	0.0364927	0.0904419	4112	tags=50%, list=35%, signal=33%	3112/3565/3674/951/1378/3570/3109/1440/3675/3563/3111/2814/7066/3678/3590/3113/928/2056/3655/3559/1438/948/3574/917/4254/3115/3581/3676/290/3568/1791/2208/3569/3690/3554/911/1435/2323/3122/915/930/912/3119/2993/3672	HLA-DOB/IL4/ITGA2B/CD37/CR1/IL6R/HLA-DMB/CSF3/ITGA3/IL3RA/HLA-DOA/GP5/THPO/ITGA5/IL11RA/HLA-DPA1/CD9/EPO/ITGA6/IL2RA/CSF2RA/CD36/IL7/CD3G/KITLG/HLA-DPB1/IL9R/ITGA4/ANPEP/IL5RA/DNTT/FCER2/IL6/ITGB3/IL1R1/CD1C/CSF1/FLT3LG/HLA-DRA/CD3D/CD19/CD1D/HLA-DQB1/GYPA/ITGA1
hsa04666	Fc gamma R-mediated phagocytosis	85	0.374364	1.42857	0.0365955	0.0365955	0.0904419	2640	tags=40%, list=22%, signal=31%	273/8395/23396/10451/8503/5291/4082/5604/5594/10000/10097/10552/10096/8936/5579/5595/57180/5290/998/8853/3984/8605/1072/3985/56848/10810/2215/5879/6199/5580/5338/4067/207/7410	AMPH/PIP5K1B/PIP5K1C/VAV3/PIK3R3/PIK3CB/MARCKS/MAP2K1/MAPK1/AKT3/ACTR2/ARPC1A/ACTR3/WASF1/PRKCB/MAPK3/ACTR3B/PIK3CA/CDC42/ASAP2/LIMK1/PLA2G4C/CFL1/LIMK2/SPHK2/WASF3/FCGR3B/RAC1/RPS6KB2/PRKCD/PLD2/LYN/AKT1/VAV2
hsa05223	Non-small cell lung cancer	69	0.391347	1.4374	0.0373402	0.0373402	0.09129	1567	tags=23%, list=13%, signal=20%	5979/8503/1647/1956/3845/5291/10912/5604/5594/10000/6654/3800/5579/5595/1643/5290	RET/PIK3R3/GADD45A/EGFR/KRAS/PIK3CB/GADD45G/MAP2K1/MAPK1/AKT3/SOS1/KIF5C/PRKCB/MAPK3/DDB2/PIK3CA
hsa05231	Choline metabolism in cancer	85	0.373628	1.42576	0.0380858	0.0380858	0.0918009	2452	tags=39%, list=21%, signal=31%	8395/5601/23396/8503/1956/3845/5291/1608/5604/5594/10000/6654/3091/5602/8936/7249/5579/5595/6009/5130/5290/10434/5154/8605/10810/5879/6199/5156/6584/5881/3265/7248/5338	PIP5K1B/MAPK9/PIP5K1C/PIK3R3/EGFR/KRAS/PIK3CB/DGKG/MAP2K1/MAPK1/AKT3/SOS1/HIF1A/MAPK10/WASF1/TSC2/PRKCB/MAPK3/RHEB/PCYT1A/PIK3CA/LYPLA1/PDGFA/PLA2G4C/WASF3/RAC1/RPS6KB2/PDGFRA/SLC22A5/RAC3/HRAS/TSC1/PLD2
hsa05120	Epithelial cell signaling in Helicobacter pylori infection	64	0.398216	1.45009	0.0383566	0.0383566	0.0918009	1653	tags=30%, list=14%, signal=26%	526/5601/523/534/6416/51606/1956/155066/527/535/9114/1147/5602/5803/9550/528/10392/998/51382	ATP6V1B2/MAPK9/ATP6V1A/ATP6V1G2/MAP2K4/ATP6V1H/EGFR/ATP6V0E2/ATP6V0C/ATP6V0A1/ATP6V0D1/CHUK/MAPK10/PTPRZ1/ATP6V1G1/ATP6V1C1/NOD1/CDC42/ATP6V1D
hsa05225	Hepatocellular carcinoma	145	0.32623	1.35372	0.0405761	0.0405761	0.0961013	2149	tags=27%, list=18%, signal=22%	51412/8503/6604/1647/1956/3845/5291/6597/10912/2947/10297/5604/5594/324/10000/2944/2002/6654/7472/7480/2941/5579/2946/4087/5595/1643/10587/5290/4040/6934/7040/4616/83439/1452/8322/4259/2953/1871/1857	ACTL6B/PIK3R3/SMARCD3/GADD45A/EGFR/KRAS/PIK3CB/SMARCA4/GADD45G/GSTM3/APC2/MAP2K1/MAPK1/APC/AKT3/GSTM1/ELK1/SOS1/WNT2/WNT10B/GSTA4/PRKCB/GSTM2/SMAD2/MAPK3/DDB2/TXNRD2/PIK3CA/LRP6/TCF7L2/TGFB1/GADD45B/TCF7L1/CSNK1A1/FZD4/MGST3/GSTT2/E2F3/DVL3
hsa04071	Sphingolipid signaling pathway	107	0.349409	1.38256	0.0424498	0.0424498	0.0995025	2474	tags=32%, list=21%, signal=25%	5332/5601/8503/253782/3845/10672/5291/5527/23236/5518/5515/5604/5594/10000/5590/9475/55012/5602/5579/5526/5595/5290/81537/5528/1509/56848/4217/5879/7124/5881/4363/3265/5338/2534	PLCB4/MAPK9/PIK3R3/CERS6/KRAS/GNA13/PIK3CB/PPP2R5C/PLCB1/PPP2R1A/PPP2CA/MAP2K1/MAPK1/AKT3/PRKCZ/ROCK2/PPP2R3C/MAPK10/PRKCB/PPP2R5B/MAPK3/PIK3CA/SGPP1/PPP2R5D/CTSD/SPHK2/MAP3K5/RAC1/TNF/RAC3/ABCC1/HRAS/PLD2/FYN
hsa04970	Salivary secretion	75	0.377106	1.40674	0.0468092	0.0468092	0.10828	2102	tags=31%, list=18%, signal=25%	5332/491/3708/6844/2778/115/23236/493/107/5566/482/481/476/5579/483/490/6263/477/114/1131/154/51806/1471	PLCB4/ATP2B2/ITPR1/VAMP2/GNAS/ADCY9/PLCB1/ATP2B4/ADCY1/PRKACA/ATP1B2/ATP1B1/ATP1A1/PRKCB/ATP1B3/ATP2B1/RYR3/ATP1A2/ADCY8/CHRM3/ADRB2/CALML5/CST3
hsa04612	Antigen processing and presentation	64	-0.35311	-1.38317	0.047147	0.047147	0.10828	4682	tags=55%, list=40%, signal=33%	100132285/3106/3804/3458/1508/4261/5720/3112/8625/3308/3809/3109/3802/3111/2923/3320/3113/4800/3135/3309/8302/3105/5994/3115/3306/6890/3824/5641/3122/1520/3305/3823/3119/3808/3310	KIR2DS2/HLA-B/KIR2DL3/IFNG/CTSB/CIITA/PSME1/HLA-DOB/RFXANK/HSPA4/KIR2DS4/HLA-DMB/KIR2DL1/HLA-DOA/PDIA3/HSP90AA1/HLA-DPA1/NFYA/HLA-G/HSPA5/KLRC4/HLA-A/RFXAP/HLA-DPB1/HSPA2/TAP1/KLRD1/LGMN/HLA-DRA/CTSS/HSPA1L/KLRC3/HLA-DQB1/KIR2DS3/HSPA6
hsa00051	Fructose and mannose metabolism	28	0.488638	1.50152	0.0479351	0.0479351	0.108989	1722	tags=36%, list=15%, signal=31%	5214/3098/5213/5208/7167/6652/230/226/4351/3099	PFKP/HK1/PFKM/PFKFB2/TPI1/SORD/ALDOC/ALDOA/MPI/HK2

## Sheet: SNAP25
Supplementary Table S5 |Gene Set Enrichment Analyses identification of SNAP25-related signaling pathways
ID	Description	setSize	enrichmentScore	NES	pvalue	p.adjust	qvalues	rank	leading_edge	core_enrichment	gene_name
hsa05012	Parkinson disease	199	0.567197	2.35006	0.00012273	0.00012273	0.00113627	2581	tags=57%, list=22%, signal=45%	7280/7345/7054/2774/5601/64837/7277/4698/291/2778/54205/4706/5718/23516/4129/7419/816/3831/4694/7384/9377/10381/292/1345/4719/7416/6622/4714/4729/7314/4717/7386/1537/6571/6389/3708/1337/10376/4697/7846/5682/1327/1347/10383/4707/5602/5709/5707/1351/10131/9451/6647/27089/4712/7326/5706/4708/203068/7417/818/3800/1350/1349/7381/293/5689/11315/10105/5713/6531/5567/5690/4700/1340/4724/4720/347733/4702/…	TUBB2A/UCHL1/TH/GNAL/MAPK9/KLC2/TUBA4A/NDUFA5/SLC25A4/GNAS/CYCS/NDUFAB1/PSMD12/SLC39A14/MAOB/VDAC3/CAMK2B/KLC1/NDUFA1/UQCRC1/COX5A/TUBB3/SLC25A5/COX6C/NDUFS1/VDAC1/SNCA/NDUFB8/NDUFV2/UBB/NDUFC1/UQCRFS1/CYC1/SLC18A2/SDHA/ITPR1/COX6A1/TUBA1B/NDUFA4/TUBA1A/PSMA1/COX4I1/COX7A2/TUBB4B/NDUFB1/MAPK10/PSMD3/PSMD1/COX8A/TRAP1/EIF2AK3/SOD1/UQCRQ/NDUFB6/UBE2G1/PSMC6/NDUFB2/TUBB/VDAC2/CAMK2G/KIF5C/COX7C/COX7…
hsa05208	Chemical carcinogenesis - reactive oxygen species	171	0.514685	2.09447	0.000126614	0.000126614	0.00113627	2576	tags=49%, list=22%, signal=39%	1956/5601/4259/6416/4698/291/5291/8503/4706/7419/1645/4694/3845/7384/9377/292/1345/4719/7416/4714/4729/2053/5594/4717/7386/1147/1537/6389/5604/1337/2947/10000/4697/3091/2941/1327/1347/4707/5879/5602/2944/1351/6647/2953/27089/4712/4708/7417/52/5595/1350/1349/572/7381/2052/293/10105/2946/2885/4700/1340/4724/5781/5290/4720/4702/4722/4704/6390/9446/4723/6654/7385/4726/29796/4705/3265/54539/9167/1329/…	EGFR/MAPK9/MGST3/MAP2K4/NDUFA5/SLC25A4/PIK3CB/PIK3R3/NDUFAB1/VDAC3/AKR1C1/NDUFA1/KRAS/UQCRC1/COX5A/SLC25A5/COX6C/NDUFS1/VDAC1/NDUFB8/NDUFV2/EPHX2/MAPK1/NDUFC1/UQCRFS1/CHUK/CYC1/SDHA/MAP2K1/COX6A1/GSTM3/AKT3/NDUFA4/HIF1A/GSTA4/COX4I1/COX7A2/NDUFB1/RAC1/MAPK10/GSTM1/COX8A/SOD1/GSTT2/UQCRQ/NDUFB6/NDUFB2/VDAC2/ACP1/MAPK3/COX7C/COX7B/BAD/UQCRB/EPHX1/SLC25A6/PPIF/GSTM2/GRB2/NDUFA6/COX6B1/NDUFS4/PTPN11/…
hsa04714	Thermogenesis	164	0.499058	2.02247	0.000127356	0.000127356	0.00113627	2721	tags=51%, list=23%, signal=40%	1353/1268/4698/115/51412/2778/2182/10891/4706/6604/107/4694/3845/7384/9377/6597/1345/4719/4714/4729/4717/7386/1537/6389/6197/1337/4697/1327/1347/6009/4707/2181/1351/1385/29078/109/27089/108/4712/4708/1350/1349/7381/7249/51103/5567/2885/4700/1340/4724/4720/4702/4722/4704/51422/6390/6595/1386/4723/23305/2180/5571/6654/7385/4726/60/29796/114/5566/4705/3265/54539/9167/1329/27330/6392/10818/4709/4701/…	COX11/CNR1/NDUFA5/ADCY9/ACTL6B/GNAS/ACSL4/PPARGC1A/NDUFAB1/SMARCD3/ADCY1/NDUFA1/KRAS/UQCRC1/COX5A/SMARCA4/COX6C/NDUFS1/NDUFB8/NDUFV2/NDUFC1/UQCRFS1/CYC1/SDHA/RPS6KA3/COX6A1/NDUFA4/COX4I1/COX7A2/RHEB/NDUFB1/ACSL3/COX8A/CREB1/NDUFAF4/ADCY3/UQCRQ/ADCY2/NDUFB6/NDUFB2/COX7C/COX7B/UQCRB/TSC2/NDUFAF1/PRKACB/GRB2/NDUFA6/COX6B1/NDUFS4/NDUFS2/NDUFA8/NDUFS3/NDUFA9/PRKAG2/SDHB/SMARCA2/ATF2/NDUFV1/ACSL6/ACSL1…
hsa05415	Diabetic cardiomyopathy	159	0.536733	2.17019	0.000127535	0.000127535	0.00113627	2587	tags=53%, list=22%, signal=42%	5332/5601/4698/291/5291/8503/4706/7419/816/4694/7384/9377/292/185/1345/4719/6262/7416/4714/4729/4717/489/7386/1537/6389/488/1337/10000/4697/1327/1347/5590/4707/7040/5879/3667/5602/1351/5162/27089/5501/4712/23236/5500/4708/7417/818/25874/183/4087/1350/1349/7381/293/5164/51660/10105/2673/4700/1340/2597/4724/5290/1509/4720/4702/4722/4704/5160/6390/4723/5166/7385/4726/29796/4705/54539/9167/1329/2936/…	PLCB4/MAPK9/NDUFA5/SLC25A4/PIK3CB/PIK3R3/NDUFAB1/VDAC3/CAMK2B/NDUFA1/UQCRC1/COX5A/SLC25A5/AGTR1/COX6C/NDUFS1/RYR2/VDAC1/NDUFB8/NDUFV2/NDUFC1/ATP2A3/UQCRFS1/CYC1/SDHA/ATP2A2/COX6A1/AKT3/NDUFA4/COX4I1/COX7A2/PRKCZ/NDUFB1/TGFB1/RAC1/IRS1/MAPK10/COX8A/PDHB/UQCRQ/PPP1CC/NDUFB6/PLCB1/PPP1CB/NDUFB2/VDAC2/CAMK2G/MPC2/AGT/SMAD2/COX7C/COX7B/UQCRB/SLC25A6/PDK2/MPC1/PPIF/GFPT1/NDUFA6/COX6B1/GAPDH/NDUFS4/PIK3…
hsa05017	Spinocerebellar ataxia	130	0.603023	2.37753	0.000131579	0.000131579	0.00113627	2126	tags=45%, list=18%, signal=37%	2911/5332/2890/5601/3752/291/5291/8503/54205/5718/7419/4976/292/7416/489/3708/488/2259/10000/9821/6712/9519/29982/30849/5682/8678/5602/5709/5707/2891/5649/5706/25814/23236/2902/10939/7417/293/8408/5689/10105/5713/5690/23369/5290/9861/5705/10213/2959/5694/7436/26100/5701/5684/5717/5685/5695/11047	GRM1/PLCB4/GRIA1/MAPK9/KCND3/SLC25A4/PIK3CB/PIK3R3/CYCS/PSMD12/VDAC3/OPA1/SLC25A5/VDAC1/ATP2A3/ITPR1/ATP2A2/FGF14/AKT3/RB1CC1/SPTBN2/TBPL1/NRBF2/PIK3R4/PSMA1/BECN1/MAPK10/PSMD3/PSMD1/GRIA2/RELN/PSMC6/ATXN10/PLCB1/GRIN1/AFG3L2/VDAC2/SLC25A6/ULK1/PSMB1/PPIF/PSMD7/PSMB2/PUM2/PIK3CA/PSMD6/PSMC5/PSMD14/GTF2B/PSMB6/VLDLR/WIPI2/PSMC2/PSMA3/PSMD11/PSMA4/PSMB7/ADRM1
hsa04723	Retrograde endocannabinoid signaling	118	0.566365	2.20615	0.000133351	0.000133351	0.00113627	2342	tags=44%, list=20%, signal=36%	57084/2911/2554/5332/2890/2785/2566/1268/5601/4698/115/3763/4706/107/4694/4719/4714/2775/4729/5594/2558/4717/2915/3708/10681/4697/4707/5602/3765/2891/109/2782/108/4712/23236/4708/5595/5567/2790/4700/4724/4720/4702/4722/4704/4723/4726/2783/114/5566/2892/4705	SLC17A6/GRM1/GABRA1/PLCB4/GRIA1/GNG3/GABRG2/CNR1/MAPK9/NDUFA5/ADCY9/KCNJ6/NDUFAB1/ADCY1/NDUFA1/NDUFS1/NDUFB8/GNAO1/NDUFV2/MAPK1/GABRA5/NDUFC1/GRM5/ITPR1/GNB5/NDUFA4/NDUFB1/MAPK10/KCNJ9/GRIA2/ADCY3/GNB1/ADCY2/NDUFB6/PLCB1/NDUFB2/MAPK3/PRKACB/GNG10/NDUFA6/NDUFS4/NDUFS2/NDUFA8/NDUFS3/NDUFA9/NDUFV1/NDUFS6/GNB2/ADCY8/PRKACA/GRIA3/NDUFA10
hsa04728	Dopaminergic synapse	115	0.555469	2.15474	0.000133815	0.000133815	0.00113627	2112	tags=37%, list=18%, signal=31%	50632/5332/2890/6323/2785/7054/1644/2774/5601/2778/5532/5530/3763/4129/816/5527/5515/2775/6571/3708/10681/10000/5518/5602/3765/2891/1385/2782/5501/23236/5500/818/55012/3800/6531/5567/2790/408/5521/5516/801/1386/5528	CALY/PLCB4/GRIA1/SCN1A/GNG3/TH/DDC/GNAL/MAPK9/GNAS/PPP3CB/PPP3CA/KCNJ6/MAOB/CAMK2B/PPP2R5C/PPP2CA/GNAO1/SLC18A2/ITPR1/GNB5/AKT3/PPP2R1A/MAPK10/KCNJ9/GRIA2/CREB1/GNB1/PPP1CC/PLCB1/PPP1CB/CAMK2G/PPP2R3C/KIF5C/SLC6A3/PRKACB/GNG10/ARRB1/PPP2R2B/PPP2CB/CALM1/ATF2/PPP2R5D
hsa01200	Carbon metabolism	100	0.566874	2.15431	0.000136855	0.000136855	0.00113627	2177	tags=45%, list=18%, signal=37%	55753/4190/2805/5214/2026/3098/5213/5315/5230/8803/3419/5631/2806/5223/10873/1738/4199/2821/1431/6389/50/10993/1737/4191/7167/2023/230/226/4967/48/5162/3421/3420/7086/29968/2597/3099/2271/22934/5160/6390/2746/38/39/26275	OGDHL/MDH1/GOT1/PFKP/ENO2/HK1/PFKM/PKM/PGK1/SUCLA2/IDH3A/PRPS1/GOT2/PGAM1/ME3/DLD/ME1/GPI/CS/SDHA/ACO2/SDS/DLAT/MDH2/TPI1/ENO1/ALDOC/ALDOA/OGDH/ACO1/PDHB/IDH3G/IDH3B/TKT/PSAT1/GAPDH/HK2/FH/RPIA/PDHA1/SDHB/GLUD1/ACAT1/ACAT2/HIBCH
hsa04725	Cholinergic synapse	96	0.495987	1.86908	0.000138255	0.000138255	0.00113627	1828	tags=32%, list=16%, signal=28%	3785/5332/43/2785/115/5291/8503/3763/1131/107/816/3761/3845/2775/5594/3708/5604/10681/10000/1385/109/2782/108/23236/818/5595/3786/5567/2790/5290/1136	KCNQ2/PLCB4/ACHE/GNG3/ADCY9/PIK3CB/PIK3R3/KCNJ6/CHRM3/ADCY1/CAMK2B/KCNJ4/KRAS/GNAO1/MAPK1/ITPR1/MAP2K1/GNB5/AKT3/CREB1/ADCY3/GNB1/ADCY2/PLCB1/CAMK2G/MAPK3/KCNQ3/PRKACB/GNG10/PIK3CA/CHRNA3
hsa04724	Glutamatergic synapse	94	0.584952	2.19753	0.000138773	0.000138773	0.00113627	1477	tags=34%, list=13%, signal=30%	57084/2911/2744/5332/2890/2785/27165/115/2778/5532/5530/81539/107/22941/6505/54407/2775/5594/2915/3708/10681/2752/2891/9456/2898/109/2782/108/23236/2902/8605/5595	SLC17A6/GRM1/GLS/PLCB4/GRIA1/GNG3/GLS2/ADCY9/GNAS/PPP3CB/PPP3CA/SLC38A1/ADCY1/SHANK2/SLC1A1/SLC38A2/GNAO1/MAPK1/GRM5/ITPR1/GNB5/GLUL/GRIA2/HOMER1/GRIK2/ADCY3/GNB1/ADCY2/PLCB1/GRIN1/PLA2G4C/MAPK3
hsa00190	Oxidative phosphorylation	85	0.684306	2.534	0.000140135	0.000140135	0.00113627	2584	tags=74%, list=22%, signal=58%	534/523/1353/526/4698/54205/4706/527/51606/5464/4694/7384/9550/9377/1345/4719/4714/4729/51382/4717/7386/1537/6389/1337/529/4697/535/9114/1327/1347/4707/27068/155066/1351/27089/528/4712/4708/537/1350/1349/7381/4700/1340/4724/4720/4702/4722/4704/6390/4723/7385/4726/29796/4705/54539/9167/1329/6392/479/4709/4701/1352	ATP6V1G2/ATP6V1A/COX11/ATP6V1B2/NDUFA5/CYCS/NDUFAB1/ATP6V0C/ATP6V1H/PPA1/NDUFA1/UQCRC1/ATP6V1G1/COX5A/COX6C/NDUFS1/NDUFB8/NDUFV2/ATP6V1D/NDUFC1/UQCRFS1/CYC1/SDHA/COX6A1/ATP6V1E1/NDUFA4/ATP6V0A1/ATP6V0D1/COX4I1/COX7A2/NDUFB1/PPA2/ATP6V0E2/COX8A/UQCRQ/ATP6V1C1/NDUFB6/NDUFB2/ATP6AP1/COX7C/COX7B/UQCRB/NDUFA6/COX6B1/NDUFS4/NDUFS2/NDUFA8/NDUFS3/NDUFA9/SDHB/NDUFV1/UQCRC2/NDUFS6/UQCR10/NDUFA10/NDUFB11/CO…
hsa04713	Circadian entrainment	83	0.504715	1.86154	0.00014043	0.00014043	0.00113627	2330	tags=40%, list=20%, signal=32%	5332/2890/2785/115/116/2778/3763/107/816/6262/2775/8911/5594/3708/10681/3765/2891/1385/109/2782/108/23236/2902/818/5595/5567/2790/801/8913/2783/114/5566/2892	PLCB4/GRIA1/GNG3/ADCY9/ADCYAP1/GNAS/KCNJ6/ADCY1/CAMK2B/RYR2/GNAO1/CACNA1I/MAPK1/ITPR1/GNB5/KCNJ9/GRIA2/CREB1/ADCY3/GNB1/ADCY2/PLCB1/GRIN1/CAMK2G/MAPK3/PRKACB/GNG10/CALM1/CACNA1G/GNB2/ADCY8/PRKACA/GRIA3
hsa04540	Gap junction	80	0.52453	1.92063	0.000141824	0.000141824	0.00113627	2433	tags=45%, list=21%, signal=36%	2911/3358/5332/7280/1956/7277/115/2778/107/3845/10381/5594/2915/3708/5604/10376/5154/7846/10383/109/108/23236/203068/5595/5156/5567/2697/2885/347733/84790/6654/3356/114/5566/3265/1813	GRM1/HTR2C/PLCB4/TUBB2A/EGFR/TUBA4A/ADCY9/GNAS/ADCY1/KRAS/TUBB3/MAPK1/GRM5/ITPR1/MAP2K1/TUBA1B/PDGFA/TUBA1A/TUBB4B/ADCY3/ADCY2/PLCB1/TUBB/MAPK3/PDGFRA/PRKACB/GJA1/GRB2/TUBB2B/TUBA1C/SOS1/HTR2A/ADCY8/PRKACA/HRAS/DRD2
hsa04727	GABAergic synapse	76	0.665786	2.4213	0.000142837	0.000142837	0.00113627	1311	tags=34%, list=11%, signal=31%	2571/2572/57468/9568/2554/2744/2785/27165/2566/115/2550/3763/81539/6529/107/6538/54407/23710/2775/2558/10681/2752/109/2782/18/108	GAD1/GAD2/SLC12A5/GABBR2/GABRA1/GLS/GNG3/GLS2/GABRG2/ADCY9/GABBR1/KCNJ6/SLC38A1/SLC6A1/ADCY1/SLC6A11/SLC38A2/GABARAPL1/GNAO1/GABRA5/GNB5/GLUL/ADCY3/GNB1/ABAT/ADCY2
hsa05032	Morphine addiction	76	0.520458	1.89278	0.000142837	0.000142837	0.00113627	1728	tags=30%, list=15%, signal=26%	9568/2554/2785/5141/2566/115/2550/2778/3763/107/2775/2558/10681/5136/3765/109/2782/5144/108/8622/5567/2790/408	GABBR2/GABRA1/GNG3/PDE4A/GABRG2/ADCY9/GABBR1/GNAS/KCNJ6/ADCY1/GNAO1/GABRA5/GNB5/PDE1A/KCNJ9/ADCY3/GNB1/PDE4D/ADCY2/PDE8B/PRKACB/GNG10/ARRB1
hsa04911	Insulin secretion	74	0.544218	1.96843	0.000144009	0.000144009	0.00113627	1554	tags=34%, list=13%, signal=30%	6616/5332/5864/885/115/116/11069/2778/483/27445/1131/107/816/6844/6262/481/476/1385/482/477/109/108/23236/818/6804	SNAP25/PLCB4/RAB3A/CCK/ADCY9/ADCYAP1/RAPGEF4/GNAS/ATP1B3/PCLO/CHRM3/ADCY1/CAMK2B/VAMP2/RYR2/ATP1B1/ATP1A1/CREB1/ATP1B2/ATP1A2/ADCY3/ADCY2/PLCB1/CAMK2G/STX1A
hsa04260	Cardiac muscle contraction	70	0.555313	1.99315	0.000145243	0.000145243	0.00113627	2452	tags=50%, list=21%, signal=40%	10479/55799/483/784/9254/7384/9377/1345/6262/481/489/7386/1537/488/1337/6543/1327/1347/476/444/1351/482/477/27089/1350/1349/7381/782/1340/7385/29796/9167/1329/786/3270	SLC9A6/CACNA2D3/ATP1B3/CACNB3/CACNA2D2/UQCRC1/COX5A/COX6C/RYR2/ATP1B1/ATP2A3/UQCRFS1/CYC1/ATP2A2/COX6A1/SLC8A2/COX4I1/COX7A2/ATP1A1/ASPH/COX8A/ATP1B2/ATP1A2/UQCRQ/COX7C/COX7B/UQCRB/CACNB1/COX6B1/UQCRC2/UQCR10/COX7A2L/COX5B/CACNG1/HRC
hsa05230	Central carbon metabolism in cancer	66	0.625624	2.22129	0.000146477	0.000146477	0.00113627	2028	tags=42%, list=17%, signal=35%	2744/27165/5979/5214/3939/3815/1956/3945/3098/5213/5315/5291/8503/4916/3845/5223/5594/5604/10000/3091/5162/9997/5595/5156/5290/3099/2261/5160	GLS/GLS2/RET/PFKP/LDHA/KIT/EGFR/LDHB/HK1/PFKM/PKM/PIK3CB/PIK3R3/NTRK3/KRAS/PGAM1/MAPK1/MAP2K1/AKT3/HIF1A/PDHB/SCO2/MAPK3/PDGFRA/PIK3CA/HK2/FGFR3/PDHA1
hsa04721	Synaptic vesicle cycle	64	0.702567	2.48159	0.000146778	0.000146778	0.00113627	952	tags=42%, list=8%, signal=39%	6616/6857/57084/1759/5864/6812/534/26052/523/526/1213/527/6529/51606/6538/6505/9550/6844/51382/1173/6536/6571/8775/1212/529/535/9114	SNAP25/SYT1/SLC17A6/DNM1/RAB3A/STXBP1/ATP6V1G2/DNM3/ATP6V1A/ATP6V1B2/CLTC/ATP6V0C/SLC6A1/ATP6V1H/SLC6A11/SLC1A1/ATP6V1G1/VAMP2/ATP6V1D/AP2M1/SLC6A9/SLC18A2/NAPA/CLTB/ATP6V1E1/ATP6V0A1/ATP6V0D1
hsa00562	Inositol phosphate metabolism	65	0.528736	1.87365	0.000146929	0.000146929	0.00113627	1903	tags=37%, list=16%, signal=31%	5332/8867/22876/3631/5297/9110/5291/3612/8395/22908/4952/23396/55361/3632/27124/7167/8898/9562/23236/5290/8776/10423/8821/9896	PLCB4/SYNJ1/INPP5F/INPP4A/PI4KA/MTMR4/PIK3CB/IMPA1/PIP5K1B/SACM1L/OCRL/PIP5K1C/PI4K2A/INPP5A/INPP5J/TPI1/MTMR2/MINPP1/PLCB1/PIK3CA/MTMR1/CDIPT/INPP4B/FIG4
hsa01230	Biosynthesis of amino acids	61	0.625716	2.19612	0.000147102	0.000147102	0.00113627	1778	tags=49%, list=15%, signal=42%	2805/440/5214/2026/384/5213/5315/5230/3419/5631/2806/5223/1431/50/10993/2752/7167/875/2023/230/226/48/3421/27430/3420/7086/435/586/29968/2597	GOT1/ASNS/PFKP/ENO2/ARG2/PFKM/PKM/PGK1/IDH3A/PRPS1/GOT2/PGAM1/CS/ACO2/SDS/GLUL/TPI1/CBS/ENO1/ALDOC/ALDOA/ACO1/IDH3G/MAT2B/IDH3B/TKT/ASL/BCAT1/PSAT1/GAPDH
hsa04720	Long-term potentiation	61	0.560147	1.96598	0.000147102	0.000147102	0.00113627	1800	tags=36%, list=15%, signal=31%	2911/5332/2890/5532/5530/107/816/3845/5594/2915/3708/5604/6197/2891/5501/23236/2902/5500/818/5595/5567/5502	GRM1/PLCB4/GRIA1/PPP3CB/PPP3CA/ADCY1/CAMK2B/KRAS/MAPK1/GRM5/ITPR1/MAP2K1/RPS6KA3/GRIA2/PPP1CC/PLCB1/GRIN1/PPP1CB/CAMK2G/MAPK3/PRKACB/PPP1R1A
hsa00010	Glycolysis / Gluconeogenesis	58	0.563346	1.95823	0.000148765	0.000148765	0.00113627	2028	tags=45%, list=17%, signal=37%	5214/3939/2026/3945/3098/5213/5315/5230/5223/5236/1738/2821/1737/7167/2023/230/226/5162/9562/26330/669/224/2597/3099/217/5160	PFKP/LDHA/ENO2/LDHB/HK1/PFKM/PKM/PGK1/PGAM1/PGM1/DLD/GPI/DLAT/TPI1/ENO1/ALDOC/ALDOA/PDHB/MINPP1/GAPDHS/BPGM/ALDH3A2/GAPDH/HK2/ALDH2/PDHA1
hsa04730	Long-term depression	51	0.60167	2.04222	0.0001523	0.0001523	0.00113627	2356	tags=43%, list=20%, signal=35%	2911/5332/2890/2778/10842/3845/5515/2775/5594/3708/5604/5518/2891/23236/8605/5595/1394/5516/10672/2781/2892/3265	GRM1/PLCB4/GRIA1/GNAS/PPP1R17/KRAS/PPP2CA/GNAO1/MAPK1/ITPR1/MAP2K1/PPP2R1A/GRIA2/PLCB1/PLA2G4C/MAPK3/CRHR1/PPP2CB/GNA13/GNAZ/GRIA3/HRAS
hsa00270	Cysteine and methionine metabolism	41	0.615578	2.00699	0.000155812	0.000155812	0.00113627	2337	tags=49%, list=20%, signal=39%	4190/2805/3939/3945/2730/2806/6611/10993/23382/4191/2729/875/58478/27430/586/1036/29968/1786/10768/1491	MDH1/GOT1/LDHA/LDHB/GCLM/GOT2/SMS/SDS/AHCYL2/MDH2/GCLC/CBS/ENOPH1/MAT2B/BCAT1/CDO1/PSAT1/DNMT1/AHCYL1/CTH
hsa00020	Citrate cycle (TCA cycle)	30	0.702196	2.13843	0.000164636	0.000164636	0.00113627	2038	tags=63%, list=17%, signal=53%	55753/4190/47/8803/3419/1738/1431/6389/50/1737/4191/4967/48/5162/3421/3420/2271/5160/6390	OGDHL/MDH1/ACLY/SUCLA2/IDH3A/DLD/CS/SDHA/ACO2/DLAT/MDH2/OGDH/ACO1/PDHB/IDH3G/IDH3B/FH/PDHA1/SDHB
hsa00250	Alanine, aspartate and glutamate metabolism	28	0.69965	2.10377	0.000164663	0.000164663	0.00113627	1402	tags=43%, list=12%, signal=38%	2571/2572/2744/2805/27165/440/2806/7915/2752/5471/18/435	GAD1/GAD2/GLS/GOT1/GLS2/ASNS/GOT2/ALDH5A1/GLUL/PPAT/ABAT/ASL
hsa05330	Allograft rejection	33	-0.583486	-2.03905	0.000262329	0.000262329	0.00174558	2683	tags=61%, list=23%, signal=47%	959/3567/3106/942/3586/3105/3113/3107/3133/355/3135/5551/3134/940/3593/3109/3108/3115/3119/3122	CD40LG/IL5/HLA-B/CD86/IL10/HLA-A/HLA-DPA1/HLA-C/HLA-E/FAS/HLA-G/PRF1/HLA-F/CD28/IL12B/HLA-DMB/HLA-DMA/HLA-DPB1/HLA-DQB1/HLA-DRA
hsa04922	Glucagon signaling pathway	88	0.477065	1.77523	0.000278629	0.000278629	0.00176385	2329	tags=34%, list=20%, signal=28%	5332/5214/3939/3945/5213/2778/5315/5532/10891/5530/816/5223/3708/10000/1385/5162/31/108/5531/23236/818/5567/51422/801/5160/1386/5260/5571/5257/5566	PLCB4/PFKP/LDHA/LDHB/PFKM/GNAS/PKM/PPP3CB/PPARGC1A/PPP3CA/CAMK2B/PGAM1/ITPR1/AKT3/CREB1/PDHB/ACACA/ADCY2/PPP4C/PLCB1/CAMK2G/PRKACB/PRKAG2/CALM1/PDHA1/ATF2/PHKG1/PRKAG1/PHKB/PRKACA
hsa05320	Autoimmune thyroid disease	46	-0.577592	-2.1837	0.00028401	0.00028401	0.00176385	3241	tags=57%, list=28%, signal=41%	1081/959/3567/3448/1493/3106/942/3586/3441/3105/3113/3107/3133/7253/355/3445/3135/5551/3134/940/3439/3109/3108/3115/3119/3122	CGA/CD40LG/IL5/IFNA14/CTLA4/HLA-B/CD86/IL10/IFNA4/HLA-A/HLA-DPA1/HLA-C/HLA-E/TSHR/FAS/IFNA8/HLA-G/PRF1/HLA-F/CD28/IFNA1/HLA-DMB/HLA-DMA/HLA-DPB1/HLA-DQB1/HLA-DRA
hsa04961	Endocrine and other factor-regulated calcium reabsorption	49	0.590349	1.98733	0.000305998	0.000305998	0.00178272	1701	tags=45%, list=14%, signal=39%	1759/5332/26052/491/1213/115/2778/793/483/1173/481/1212/6543/490/476/482/493/477/23236/8766/1175/5567	DNM1/PLCB4/DNM3/ATP2B2/CLTC/ADCY9/GNAS/CALB1/ATP1B3/AP2M1/ATP1B1/CLTB/SLC8A2/ATP2B1/ATP1A1/ATP1B2/ATP2B4/ATP1A2/PLCB1/RAB11A/AP2S1/PRKACB
hsa05321	Inflammatory bowel disease	59	-0.493994	-1.96985	0.000306185	0.000306185	0.00178272	1529	tags=36%, list=13%, signal=31%	51561/7097/3566/3725/6778/50615/8809/3459/3593/64127/3109/3595/7100/3108/3605/4790/3606/4094/3115/3119/3122	IL23A/TLR2/IL4R/JUN/STAT6/IL21R/IL18R1/IFNGR1/IL12B/NOD2/HLA-DMB/IL12RB2/TLR5/HLA-DMA/IL17A/NFKB1/IL18/MAF/HLA-DPB1/HLA-DQB1/HLA-DRA
hsa05150	Staphylococcus aureus infection	71	-0.579574	-2.40282	0.00032144	0.00032144	0.00181483	2982	tags=52%, list=25%, signal=39%	1671/5340/3426/719/3857/2204/5648/3586/3886/3880/25984/629/3113/1675/713/712/3859/4153/3868/2358/3866/3689/728/6404/3109/54474/3108/3684/5724/3683/9103/2213/3115/2212/3119/3122/3075	DEFA6/PLG/CFI/C3AR1/KRT9/FCAR/MASP1/IL10/KRT35/KRT19/KRT23/CFB/HLA-DPA1/CFD/C1QB/C1QA/KRT12/MBL2/KRT16/FPR2/KRT15/ITGB2/C5AR1/SELPLG/HLA-DMB/KRT20/HLA-DMA/ITGAM/PTAFR/ITGAL/FCGR2C/FCGR2B/HLA-DPB1/FCGR2A/HLA-DQB1/HLA-DRA/CFH
hsa04061	Viral protein interaction with cytokine and cytokine receptor	86	-0.579183	-2.48003	0.000354484	0.000354484	0.00185102	3280	tags=66%, list=28%, signal=48%	8794/1236/4283/6367/10563/1435/6361/6356/2921/3560/6357/6355/3586/8793/3577/3559/1230/6346/6369/8740/57007/29949/3627/5197/6364/6366/1232/3576/1436/8764/6360/1234/7132/6373/6362/8809/6354/3588/3570/6352/27178/2920/2833/1235/6351/6375/8795/6363/8743/7852/3606/2919/3579/3587/6368/6387/7133	TNFRSF10C/CCR7/CXCL9/CCL22/CXCL13/CSF1/CCL17/CCL11/CXCL3/IL2RB/CCL13/CCL8/IL10/TNFRSF10D/CXCR1/IL2RA/CCR1/CCL1/CCL24/TNFSF14/ACKR3/IL19/CXCL10/PF4V1/CCL20/CCL21/CCR3/CXCL8/CSF1R/TNFRSF14/CCL16/CCR5/TNFRSF1A/CXCL11/CCL18/IL18R1/CCL7/IL10RB/IL6R/CCL5/IL37/CXCL2/CXCR3/CCR6/CCL4/XCL1/TNFRSF10B/CCL19/TNFSF10/CXCR4/IL18/CXCL1/CXCR2/IL10RA/CCL23/CXCL12/TNFRSF1B
hsa04640	Hematopoietic cell lineage	90	-0.451669	-1.95608	0.000355114	0.000355114	0.00185102	3226	tags=51%, list=27%, signal=37%	933/3567/920/2814/1435/290/3562/3589/4311/3676/945/3574/3690/948/3559/3113/3568/4254/3678/2208/1438/1436/3566/1437/3581/930/1791/915/3563/1441/3570/3672/911/917/951/3109/912/3108/3684/7066/2323/3115/2993/7850/3119/3122	CD22/IL5/CD4/GP5/CSF1/ANPEP/IL3/IL11/MME/ITGA4/CD33/IL7/ITGB3/CD36/IL2RA/HLA-DPA1/IL5RA/KITLG/ITGA5/FCER2/CSF2RA/CSF1R/IL4R/CSF2/IL9R/CD19/DNTT/CD3D/IL3RA/CSF3R/IL6R/ITGA1/CD1C/CD3G/CD37/HLA-DMB/CD1D/HLA-DMA/ITGAM/THPO/FLT3LG/HLA-DPB1/GYPA/IL1R2/HLA-DQB1/HLA-DRA
hsa04064	NF-kappa B signaling pathway	93	-0.45747	-1.99301	0.000357654	0.000357654	0.00185102	1937	tags=34%, list=16%, signal=29%	27040/8740/8837/5971/6366/79092/3576/7188/23586/10892/7132/7412/330/472/5336/2920/29760/6351/29775/5335/3551/5743/7128/4790/6363/695/55367/23643/2919/8915/6387/6850	LAT/TNFSF14/CFLAR/RELB/CCL21/CARD14/CXCL8/TRAF5/DDX58/MALT1/TNFRSF1A/VCAM1/BIRC3/ATM/PLCG2/CXCL2/BLNK/CCL4/CARD10/PLCG1/IKBKB/PTGS2/TNFAIP3/NFKB1/CCL19/BTK/PIDD1/LY96/CXCL1/BCL10/CXCL12/SYK
hsa04932	Non-alcoholic fatty liver disease	134	0.445355	1.76381	0.000393133	0.000393133	0.00197965	2576	tags=47%, list=22%, signal=37%	5601/4698/5291/8503/54205/4706/4694/7384/9377/1345/4719/4714/4729/4717/7386/1537/6389/1337/10000/4697/1327/1347/51085/4707/7040/5879/3667/5602/1351/9451/27089/4712/4708/1350/1349/7381/4700/1340/4724/5290/4720/4702/4722/4704/51422/6390/3553/4723/7124/6720/5571/7385/4726/29796/4705/54539/9167/1329/8660/6392/4709/2931/4701	MAPK9/NDUFA5/PIK3CB/PIK3R3/CYCS/NDUFAB1/NDUFA1/UQCRC1/COX5A/COX6C/NDUFS1/NDUFB8/NDUFV2/NDUFC1/UQCRFS1/CYC1/SDHA/COX6A1/AKT3/NDUFA4/COX4I1/COX7A2/MLXIPL/NDUFB1/TGFB1/RAC1/IRS1/MAPK10/COX8A/EIF2AK3/UQCRQ/NDUFB6/NDUFB2/COX7C/COX7B/UQCRB/NDUFA6/COX6B1/NDUFS4/PIK3CA/NDUFS2/NDUFA8/NDUFS3/NDUFA9/PRKAG2/SDHB/IL1B/NDUFV1/TNF/SREBF1/PRKAG1/UQCRC2/NDUFS6/UQCR10/NDUFA10/NDUFB11/COX7A2L/COX5B/IRS2/SDHD/NDUFB3…
hsa04925	Aldosterone synthesis and secretion	83	0.485545	1.79083	0.000421289	0.000421289	0.0020656	2090	tags=39%, list=18%, signal=32%	5332/491/115/2778/483/107/816/185/8911/481/3777/3708/4929/490/476/1385/482/493/477/109/108/57172/23236/818/183/4158/5567/8536/949/801/8913/1386	PLCB4/ATP2B2/ADCY9/GNAS/ATP1B3/ADCY1/CAMK2B/AGTR1/CACNA1I/ATP1B1/KCNK3/ITPR1/NR4A2/ATP2B1/ATP1A1/CREB1/ATP1B2/ATP2B4/ATP1A2/ADCY3/ADCY2/CAMK1G/PLCB1/CAMK2G/AGT/MC2R/PRKACB/CAMK1/SCARB1/CALM1/CACNA1G/ATF2
hsa05033	Nicotine addiction	31	0.617721	1.89573	0.000491642	0.000491642	0.00234596	1389	tags=23%, list=12%, signal=20%	57084/2554/2890/2566/2558/2891/2902	SLC17A6/GABRA1/GRIA1/GABRG2/GABRA5/GRIA2/GRIN1
hsa05310	Asthma	26	-0.607721	-2.00273	0.000503651	0.000503651	0.00234596	3652	tags=77%, list=31%, signal=53%	3565/3111/959/3567/6356/3562/8288/3596/3586/3113/3578/5553/2207/2205/6037/3109/3108/3115/3119/3122	IL4/HLA-DOA/CD40LG/IL5/CCL11/IL3/EPX/IL13/IL10/HLA-DPA1/IL9/PRG2/FCER1G/FCER1A/RNASE3/HLA-DMB/HLA-DMA/HLA-DPB1/HLA-DQB1/HLA-DRA
hsa05171	Coronavirus disease - COVID-19	200	-0.348123	-1.70603	0.000536769	0.000536769	0.00243923	2993	tags=40%, list=25%, signal=30%	6300/3448/6218/2244/1432/6128/719/6157/7311/4615/5648/4599/6203/6169/5603/3441/6170/6774/10379/6166/6202/6181/6223/6165/11224/3454/629/731/57506/1675/713/1839/2165/3627/6205/25873/7297/712/7097/9045/3576/2243/7450/1437/4153/114548/6193/23586/3445/7132/3725/733/6143/9636/6141/1536/6210/1636/6135/4312/3570/3593/51284/3439/5336/834/728/4600/5335/3551/2162/8829/4790/140801/7098/6159/64135/6850/4938/2…	MAPK12/IFNA14/RPS17/FGB/MAPK14/RPL6/C3AR1/RPL27A/UBA52/MYD88/MASP1/MX1/RPS9/RPL38/MAPK13/IFNA4/RPL39/STAT3/IRF9/RPL36AL/RPS8/RPLP2/RPS19/RPL35A/RPL35/IFNAR1/CFB/C8A/MAVS/CFD/C1QB/HBEGF/F13B/CXCL10/RPS11/RPL36/TYK2/C1QA/TLR2/RPL14/CXCL8/FGA/VWF/CSF2/MBL2/NLRP3/RPS5/DDX58/IFNA8/TNFRSF1A/JUN/C8G/RPL19/ISG15/RPL18/CYBB/RPS15A/ACE/RPL11/MMP1/IL6R/IL12B/TLR7/IFNA1/PLCG2/CASP1/C5AR1/MX2/PLCG1/IKBKB/F13A…
hsa04114	Oocyte meiosis	97	0.458559	1.72992	0.000691946	0.000691946	0.00304236	2546	tags=41%, list=22%, signal=33%	7533/115/5532/5530/22849/107/816/5527/5515/5594/7529/3708/5604/6197/25847/996/5518/7531/109/108/5501/7534/10971/9232/6500/5500/818/5595/8379/5567/891/5516/801/5528/8945/114/5566/9985/27330/8697	YWHAH/ADCY9/PPP3CB/PPP3CA/CPEB3/ADCY1/CAMK2B/PPP2R5C/PPP2CA/MAPK1/YWHAB/ITPR1/MAP2K1/RPS6KA3/ANAPC13/CDC27/PPP2R1A/YWHAE/ADCY3/ADCY2/PPP1CC/YWHAZ/YWHAQ/PTTG1/SKP1/PPP1CB/CAMK2G/MAPK3/MAD1L1/PRKACB/CCNB1/PPP2CB/CALM1/PPP2R5D/BTRC/ADCY8/PRKACA/REC8/RPS6KA6/CDC23
hsa04070	Phosphatidylinositol signaling system	83	0.473252	1.7455	0.000702149	0.000702149	0.00304236	1865	tags=30%, list=16%, signal=26%	5332/8867/22876/3631/5297/9110/5291/8503/3612/8395/22908/4952/23396/55361/23262/3708/3632/8760/8898/23236/9677/5290/8776/10423/8821	PLCB4/SYNJ1/INPP5F/INPP4A/PI4KA/MTMR4/PIK3CB/PIK3R3/IMPA1/PIP5K1B/SACM1L/OCRL/PIP5K1C/PI4K2A/PPIP5K2/ITPR1/INPP5A/CDS2/MTMR2/PLCB1/PPIP5K1/PIK3CA/MTMR1/CDIPT/INPP4B
hsa01210	2-Oxocarboxylic acid metabolism	13	0.764703	1.91474	0.000720072	0.000720072	0.00304911	1691	tags=69%, list=14%, signal=59%	2805/3419/2806/1431/50/48/3421/3420/586	GOT1/IDH3A/GOT2/CS/ACO2/ACO1/IDH3G/IDH3B/BCAT1
hsa05332	Graft-versus-host disease	36	-0.55909	-1.99528	0.000804074	0.000804074	0.00332915	2683	tags=50%, list=23%, signal=39%	3106/942/3811/3802/3105/3113/3107/3133/355/3135/5551/3134/940/3109/3108/3115/3119/3122	HLA-B/CD86/KIR3DL1/KIR2DL1/HLA-A/HLA-DPA1/HLA-C/HLA-E/FAS/HLA-G/PRF1/HLA-F/CD28/HLA-DMB/HLA-DMA/HLA-DPB1/HLA-DQB1/HLA-DRA
hsa05164	Influenza A	156	-0.328933	-1.55592	0.000920387	0.000920387	0.00366374	1460	tags=40%, list=12%, signal=35%	317/4940/56649/637/3448/5340/9407/3460/3841/1965/4615/4599/1021/3441/10482/10379/2033/842/3454/896/56000/57506/3113/3627/7297/11100/3576/355/578/114548/23586/3717/3445/7132/79671/3459/581/83447/6352/3593/51284/3439/834/29108/4600/3109/5611/8795/3551/3665/3108/4790/8743/7098/3337/3606/3115/64135/91543/4938/3119/3122	APAF1/OAS3/TMPRSS4/BID/IFNA14/PLG/TMPRSS11D/IFNGR2/KPNA5/EIF2S1/MYD88/MX1/CDK6/IFNA4/NXF1/IRF9/EP300/CASP9/IFNAR1/CCND3/NXF3/MAVS/HLA-DPA1/CXCL10/TYK2/HNRNPUL1/CXCL8/FAS/BAK1/NLRP3/DDX58/JAK2/IFNA8/TNFRSF1A/NLRX1/IFNGR1/BAX/SLC25A31/CCL5/IL12B/TLR7/IFNA1/CASP1/PYCARD/MX2/HLA-DMB/DNAJC3/TNFRSF10B/IKBKB/IRF7/HLA-DMA/NFKB1/TNFSF10/TLR3/DNAJB1/IL18/HLA-DPB1/IFIH1/RSAD2/OAS1/HLA-DQB1/HLA-DRA
hsa04261	Adrenergic signaling in cardiomyocytes	129	0.438503	1.72518	0.000924214	0.000924214	0.00366374	2112	tags=36%, list=18%, signal=30%	5332/491/115/55799/11069/2778/483/784/9254/107/816/5527/5515/185/6262/5594/481/489/488/6543/6324/10000/490/476/5518/1385/482/493/477/109/108/5501/23236/5500/818/55012/5595/183/782/5567/5502/5521/5516/801/1386/5528	PLCB4/ATP2B2/ADCY9/CACNA2D3/RAPGEF4/GNAS/ATP1B3/CACNB3/CACNA2D2/ADCY1/CAMK2B/PPP2R5C/PPP2CA/AGTR1/RYR2/MAPK1/ATP1B1/ATP2A3/ATP2A2/SLC8A2/SCN1B/AKT3/ATP2B1/ATP1A1/PPP2R1A/CREB1/ATP1B2/ATP2B4/ATP1A2/ADCY3/ADCY2/PPP1CC/PLCB1/PPP1CB/CAMK2G/PPP2R3C/MAPK3/AGT/CACNB1/PRKACB/PPP1R1A/PPP2R2B/PPP2CB/CALM1/ATF2/PPP2R5D
hsa04144	Endocytosis	199	0.383198	1.5877	0.000981836	0.000981836	0.00376239	2231	tags=31%, list=19%, signal=26%	273/1759/6456/10193/26052/440073/30845/1956/1213/60682/9829/8723/8395/23396/8853/56904/26056/1173/8027/5868/10564/9525/9922/1212/57180/5590/377/55040/10552/11059/50807/378/10096/830/10097/25978/9101/5584/3800/4087/57403/8766/5156/1175/408/9146/6457/11311/50855/7879/51510/2261/8218/5869/51324/161/81873/57132/2060/9559/55737/22841	AMPH/DNM1/SH3GL2/RNF41/DNM3/IQSEC3/EHD3/EGFR/CLTC/SMAP1/DNAJC6/SNX4/PIP5K1B/PIP5K1C/ASAP2/SH3GLB2/RAB11FIP5/AP2M1/STAM/RAB5A/ARFGEF2/VPS4B/IQSEC1/CLTB/ACTR3B/PRKCZ/ARF3/EPN3/ARPC1A/WWP1/ASAP1/ARF4/ACTR3/CAPZA2/ACTR2/CHMP2B/USP8/PRKCI/KIF5C/SMAD2/RAB22A/RAB11A/PDGFRA/AP2S1/ARRB1/HGS/SH3GL3/VPS45/PARD6A/RAB7A/CHMP5/FGFR3/CLTCL1/RAB5B/SPG21/AP2A2/ARPC5L/CHMP1B/EPS15/VPS26A/VPS35/RAB11FIP2
hsa04024	cAMP signaling pathway	189	0.396507	1.63372	0.000989487	0.000989487	0.00376239	1799	tags=27%, list=15%, signal=23%	9568/2890/7432/6750/5141/10451/5601/491/115/116/11069/2550/2778/5291/8503/483/107/816/6262/5594/481/489/5604/488/10000/490/9475/476/5879/5602/2891/1385/482/493/477/109/5144/108/5501/22800/2902/5500/818/5595/572/5727/4886/4158/5567/1394/5290	GABBR2/GRIA1/VIP/SST/PDE4A/VAV3/MAPK9/ATP2B2/ADCY9/ADCYAP1/RAPGEF4/GABBR1/GNAS/PIK3CB/PIK3R3/ATP1B3/ADCY1/CAMK2B/RYR2/MAPK1/ATP1B1/ATP2A3/MAP2K1/ATP2A2/AKT3/ATP2B1/ROCK2/ATP1A1/RAC1/MAPK10/GRIA2/CREB1/ATP1B2/ATP2B4/ATP1A2/ADCY3/PDE4D/ADCY2/PPP1CC/RRAS2/GRIN1/PPP1CB/CAMK2G/MAPK3/BAD/PTCH1/NPY1R/MC2R/PRKACB/CRHR1/PIK3CA
hsa00220	Arginine biosynthesis	17	0.710926	1.89772	0.00105134	0.00105134	0.00389403	1402	tags=41%, list=12%, signal=36%	2744/2805/27165/384/2806/2752/435	GLS/GOT1/GLS2/ARG2/GOT2/GLUL/ASL
hsa00430	Taurine and hypotaurine metabolism	12	0.769493	1.88511	0.00108578	0.00108578	0.00389403	16	tags=17%, list=0%, signal=17%	2571/2572	GAD1/GAD2
hsa01240	Biosynthesis of cofactors	105	0.442679	1.69374	0.00108681	0.00108681	0.00389403	2207	tags=32%, list=19%, signal=27%	23057/55312/4830/2730/8836/5805/1738/7360/51727/51109/8566/2729/8630/27430/23475/79646/211/9054/5498/3145/586/4337/224/29968/217/80025/102157402/10797/1503/10243/11019/27010/4351/4338	NMNAT2/RFK/NME1/GCLM/GGH/PTS/DLD/UGP2/CMPK1/RDH11/PDXK/GCLC/HSD17B6/MAT2B/QPRT/PANK3/ALAS1/NFS1/PPOX/HMBS/BCAT1/MOCS1/ALDH3A2/PSAT1/ALDH2/PANK2/AK6/MTHFD2/CTPS1/GPHN/LIAS/TPK1/MPI/MOCS2
hsa04672	Intestinal immune network for IgA production	40	-0.516843	-1.88475	0.00110957	0.00110957	0.00390057	3194	tags=52%, list=27%, signal=38%	3695/959/3567/3676/942/29851/3586/57379/3113/3601/608/8741/940/3600/3109/3108/7852/3115/6387/3119/3122	ITGB7/CD40LG/IL5/ITGA4/CD86/ICOS/IL10/AICDA/HLA-DPA1/IL15RA/TNFRSF17/TNFSF13/CD28/IL15/HLA-DMB/HLA-DMA/CXCR4/HLA-DPB1/CXCL12/HLA-DQB1/HLA-DRA
hsa05322	Systemic lupus erythematosus	45	-0.4931	-1.85152	0.00113379	0.00113379	0.0039119	1985	tags=31%, list=17%, signal=26%	731/3113/713/712/733/6628/940/3109/81/3108/3115/2212/3119/3122	C8A/HLA-DPA1/C1QB/C1QA/C8G/SNRPB/CD28/HLA-DMB/ACTN4/HLA-DMA/HLA-DPB1/FCGR2A/HLA-DQB1/HLA-DRA
hsa00620	Pyruvate metabolism	40	0.562888	1.82545	0.00140691	0.00140691	0.00476599	2171	tags=48%, list=18%, signal=39%	4190/3939/3945/5315/10873/1738/4199/1737/4191/2739/97/5162/31/224/217/2271/5160/38/39	MDH1/LDHA/LDHB/PKM/ME3/DLD/ME1/DLAT/MDH2/GLO1/ACYP1/PDHB/ACACA/ALDH3A2/ALDH2/FH/PDHA1/ACAT1/ACAT2
hsa04140	Autophagy - animal	121	0.430441	1.68224	0.00159405	0.00159405	0.00530351	1954	tags=35%, list=17%, signal=29%	5601/9110/5291/8503/3845/23710/1612/5515/664/5594/3708/5604/5861/10670/10000/3091/9821/29982/30849/8678/6009/3667/5602/23192/9451/81631/22800/5595/9474/572/10010/7249/8408/5567/11345/5290/1509/55255/10533/7879/26100/5516	MAPK9/MTMR4/PIK3CB/PIK3R3/KRAS/GABARAPL1/DAPK1/PPP2CA/BNIP3/MAPK1/ITPR1/MAP2K1/RAB1A/RRAGA/AKT3/HIF1A/RB1CC1/NRBF2/PIK3R4/BECN1/RHEB/IRS1/MAPK10/ATG4B/EIF2AK3/MAP1LC3B/RRAS2/MAPK3/ATG5/BAD/TANK/TSC2/ULK1/PRKACB/GABARAPL2/PIK3CA/CTSD/WDR41/ATG7/RAB7A/WIPI2/PPP2CB
hsa04929	GnRH secretion	59	0.502719	1.75294	0.00163302	0.00163302	0.00533784	2143	tags=36%, list=18%, signal=29%	9568/5332/2550/5291/8503/3763/3845/8911/5594/3708/5604/10000/3765/23236/5595/408/5290/8913/610/7220/6696	GABBR2/PLCB4/GABBR1/PIK3CB/PIK3R3/KCNJ6/KRAS/CACNA1I/MAPK1/ITPR1/MAP2K1/AKT3/KCNJ9/PLCB1/MAPK3/ARRB1/PIK3CA/CACNA1G/HCN2/TRPC1/SPP1
hsa04926	Relaxin signaling pathway	114	0.433585	1.67991	0.00187416	0.00187416	0.00602045	1799	tags=28%, list=15%, signal=24%	5332/2785/1956/5601/6416/115/2778/1910/5291/8503/107/3845/2775/5594/5604/10681/10000/5590/7040/5602/1385/109/2782/108/23236/5595/4087/5567/2790/408/2885/5290	PLCB4/GNG3/EGFR/MAPK9/MAP2K4/ADCY9/GNAS/EDNRB/PIK3CB/PIK3R3/ADCY1/KRAS/GNAO1/MAPK1/MAP2K1/GNB5/AKT3/PRKCZ/TGFB1/MAPK10/CREB1/ADCY3/GNB1/ADCY2/PLCB1/MAPK3/SMAD2/PRKACB/GNG10/ARRB1/GRB2/PIK3CA
hsa04072	Phospholipase D signaling pathway	131	0.41379	1.63222	0.00210748	0.00210748	0.0066552	1799	tags=27%, list=15%, signal=24%	1759/2911/5332/26052/3815/1956/115/11069/2778/5291/8503/107/3845/5899/8395/23396/185/5594/2915/5604/10000/5154/6009/109/108/22800/23236/8605/5595/183/7249/5156/55326/2885/5781/5290	DNM1/GRM1/PLCB4/DNM3/KIT/EGFR/ADCY9/RAPGEF4/GNAS/PIK3CB/PIK3R3/ADCY1/KRAS/RALB/PIP5K1B/PIP5K1C/AGTR1/MAPK1/GRM5/MAP2K1/AKT3/PDGFA/RHEB/ADCY3/ADCY2/RRAS2/PLCB1/PLA2G4C/MAPK3/AGT/TSC2/PDGFRA/AGPAT5/GRB2/PTPN11/PIK3CA
hsa04150	mTOR signaling pathway	126	0.410374	1.61098	0.0022466	0.0022466	0.00687402	2507	tags=33%, list=21%, signal=27%	534/523/526/5291/8503/51606/3845/9550/23175/81929/51382/8649/5594/1147/5604/6197/10670/529/10000/55615/6009/3667/51719/6249/528/9663/5595/1977/7249/8408/2885/5290/2887/7124/6654/81617/10542/3265/7471/79109/27330/8321	ATP6V1G2/ATP6V1A/ATP6V1B2/PIK3CB/PIK3R3/ATP6V1H/KRAS/ATP6V1G1/LPIN1/SEH1L/ATP6V1D/LAMTOR3/MAPK1/CHUK/MAP2K1/RPS6KA3/RRAGA/ATP6V1E1/AKT3/PRR5/RHEB/IRS1/CAB39/CLIP1/ATP6V1C1/LPIN2/MAPK3/EIF4E/TSC2/ULK1/GRB2/PIK3CA/GRB10/TNF/SOS1/CAB39L/LAMTOR5/HRAS/WNT1/MAPKAP1/RPS6KA6/FZD1
hsa05145	Toxoplasmosis	102	-0.360088	-1.59508	0.00225056	0.00225056	0.00687402	2831	tags=39%, list=24%, signal=30%	1432/3460/3305/3908/10319/3914/4615/3918/3586/5603/79444/8651/6774/842/240/3113/5170/7297/7097/3911/22798/3717/1234/7132/330/5294/3459/3588/3593/3912/3109/3310/3551/3108/4790/23643/3115/3587/3119/3122	MAPK14/IFNGR2/HSPA1L/LAMA2/LAMC3/LAMB3/MYD88/LAMC2/IL10/MAPK13/BIRC7/SOCS1/STAT3/CASP9/ALOX5/HLA-DPA1/PDPK1/TYK2/TLR2/LAMA5/LAMB4/JAK2/CCR5/TNFRSF1A/BIRC3/PIK3CG/IFNGR1/IL10RB/IL12B/LAMB1/HLA-DMB/HSPA6/IKBKB/HLA-DMA/NFKB1/LY96/HLA-DPB1/IL10RA/HLA-DQB1/HLA-DRA
hsa05034	Alcoholism	86	0.448701	1.66651	0.00236736	0.00236736	0.00706771	2510	tags=37%, list=21%, signal=29%	2785/7054/1644/2778/4129/3845/2775/5594/6571/5604/10681/4915/1385/2782/5501/2902/5569/5500/5595/6531/5567/2790/2885/801/1386/6654/2783/5566/3265/1813/10014/53358	GNG3/TH/DDC/GNAS/MAOB/KRAS/GNAO1/MAPK1/SLC18A2/MAP2K1/GNB5/NTRK2/CREB1/GNB1/PPP1CC/GRIN1/PKIA/PPP1CB/MAPK3/SLC6A3/PRKACB/GNG10/GRB2/CALM1/ATF2/SOS1/GNB2/PRKACA/HRAS/DRD2/HDAC5/SHC3
hsa05031	Amphetamine addiction	57	0.497249	1.72366	0.00238984	0.00238984	0.00706771	2330	tags=39%, list=20%, signal=31%	2890/7054/1644/2778/5532/5530/4129/816/6571/2891/1385/5501/2902/5500/818/6804/6531/5567/801/1386/5566/2892	GRIA1/TH/DDC/GNAS/PPP3CB/PPP3CA/MAOB/CAMK2B/SLC18A2/GRIA2/CREB1/PPP1CC/GRIN1/PPP1CB/CAMK2G/STX1A/SLC6A3/PRKACB/CALM1/ATF2/PRKACA/GRIA3
hsa04972	Pancreatic secretion	86	0.447239	1.66108	0.00250661	0.00250661	0.00729722	1387	tags=27%, list=12%, signal=24%	5332/885/491/115/2778/483/1131/107/6262/481/489/3708/488/490/476/5879/482/493/477/109/108/8671/23236	PLCB4/CCK/ATP2B2/ADCY9/GNAS/ATP1B3/CHRM3/ADCY1/RYR2/ATP1B1/ATP2A3/ITPR1/ATP2A2/ATP2B1/ATP1A1/RAC1/ATP1B2/ATP2B4/ATP1A2/ADCY3/ADCY2/SLC4A4/PLCB1
hsa04910	Insulin signaling pathway	124	0.406364	1.5921	0.00264936	0.00264936	0.00759411	2356	tags=34%, list=20%, signal=27%	5575/5601/3098/2194/5291/8503/10891/3845/5577/5594/3632/5604/10000/8569/5573/5590/6009/3667/5602/31/5501/5500/5595/5584/572/1977/7249/5567/2885/2002/5290/3099/23433/51422/801/5260/6720/5571/6654/5257/5566/3265	PRKAR1B/MAPK9/HK1/FASN/PIK3CB/PIK3R3/PPARGC1A/KRAS/PRKAR2B/MAPK1/INPP5A/MAP2K1/AKT3/MKNK1/PRKAR1A/PRKCZ/RHEB/IRS1/MAPK10/ACACA/PPP1CC/PPP1CB/MAPK3/PRKCI/BAD/EIF4E/TSC2/PRKACB/GRB2/ELK1/PIK3CA/HK2/RHOQ/PRKAG2/CALM1/PHKG1/SREBF1/PRKAG1/SOS1/PHKB/PRKACA/HRAS
hsa04610	Complement and coagulation cascades	79	-0.397558	-1.681	0.00272851	0.00272851	0.0077025	3407	tags=58%, list=29%, signal=42%	735/718/727/10544/2149/2147/81494/3687/462/10747/5328/2161/2244/5340/3426/5055/719/2159/5648/10877/5329/710/3827/629/731/1675/713/2153/2165/712/3818/2243/7450/5627/4153/2/733/2151/5327/3689/728/5265/2162/3684/11326/3075	C9/C3/C5/PROCR/F2R/F2/CFHR5/ITGAX/SERPINC1/MASP2/PLAU/F12/FGB/PLG/CFI/SERPINB2/C3AR1/F10/MASP1/CFHR4/PLAUR/SERPING1/KNG1/CFB/C8A/CFD/C1QB/F5/F13B/C1QA/KLKB1/FGA/VWF/PROS1/MBL2/A2M/C8G/F2RL2/PLAT/ITGB2/C5AR1/SERPINA1/F13A1/ITGAM/VSIG4/CFH
hsa04921	Oxytocin signaling pathway	126	0.40258	1.58039	0.00303951	0.00303951	0.00845238	1781	tags=28%, list=15%, signal=24%	5332/1956/115/55799/2778/5532/784/5530/3763/9254/107/816/3761/3845/6262/2775/5594/3708/5604/9475/3765/109/108/5501/57172/23236/5500/8605/818/5595/782/5567/8536/2002/4776	PLCB4/EGFR/ADCY9/CACNA2D3/GNAS/PPP3CB/CACNB3/PPP3CA/KCNJ6/CACNA2D2/ADCY1/CAMK2B/KCNJ4/KRAS/RYR2/GNAO1/MAPK1/ITPR1/MAP2K1/ROCK2/KCNJ9/ADCY3/ADCY2/PPP1CC/CAMK1G/PLCB1/PPP1CB/PLA2G4C/CAMK2G/MAPK3/CACNB1/PRKACB/CAMK1/ELK1/NFATC4
hsa04971	Gastric acid secretion	63	0.479974	1.69318	0.0032225	0.0032225	0.00875949	1452	tags=32%, list=12%, signal=28%	5332/6750/115/2778/483/1131/107/816/481/3773/3708/7430/476/482/477/109/108/3766/23236/818	PLCB4/SST/ADCY9/GNAS/ATP1B3/CHRM3/ADCY1/CAMK2B/ATP1B1/KCNJ16/ITPR1/EZR/ATP1A1/ATP1B2/ATP1A2/ADCY3/ADCY2/KCNJ10/PLCB1/CAMK2G
hsa04964	Proximal tubule bicarbonate reclamation	21	0.637018	1.79398	0.00324398	0.00324398	0.00875949	1323	tags=43%, list=11%, signal=38%	2744/4190/27165/483/481/476/482/477/8671	GLS/MDH1/GLS2/ATP1B3/ATP1B1/ATP1A1/ATP1B2/ATP1A2/SLC4A4
hsa05140	Leishmaniasis	70	-0.40291	-1.66338	0.00384986	0.00384986	0.0102039	1280	tags=26%, list=11%, signal=23%	3717/3725/1536/3459/4689/3593/3689/3109/653361/5743/3108/3684/4790/9103/3115/2212/3119/3122	JAK2/JUN/CYBB/IFNGR1/NCF4/IL12B/ITGB2/HLA-DMB/NCF1/PTGS2/HLA-DMA/ITGAM/NFKB1/FCGR2C/HLA-DPB1/FCGR2A/HLA-DQB1/HLA-DRA
hsa04966	Collecting duct acid secretion	22	0.633277	1.80457	0.00388842	0.00388842	0.0102039	1329	tags=50%, list=11%, signal=44%	534/523/526/527/9550/51382/529/535/9114/155066/528	ATP6V1G2/ATP6V1A/ATP6V1B2/ATP6V0C/ATP6V1G1/ATP6V1D/ATP6V1E1/ATP6V0A1/ATP6V0D1/ATP6V0E2/ATP6V1C1
hsa04659	Th17 cell differentiation	98	-0.350494	-1.544	0.0040146	0.0040146	0.0103887	3078	tags=43%, list=26%, signal=32%	920/4772/6300/3662/1432/3460/3932/3560/59067/4088/5603/6774/3559/3113/27040/7297/51561/3566/3717/7048/3725/915/6778/4775/50615/3459/196/3556/3570/919/917/3109/5335/3551/9466/3108/3605/4790/3115/10148/3119/3122	CD4/NFATC1/MAPK12/IRF4/MAPK14/IFNGR2/LCK/IL2RB/IL21/SMAD3/MAPK13/STAT3/IL2RA/HLA-DPA1/LAT/TYK2/IL23A/IL4R/JAK2/TGFBR2/JUN/CD3D/STAT6/NFATC3/IL21R/IFNGR1/AHR/IL1RAP/IL6R/CD247/CD3G/HLA-DMB/PLCG1/IKBKB/IL27RA/HLA-DMA/IL17A/NFKB1/HLA-DPB1/EBI3/HLA-DQB1/HLA-DRA
hsa04658	Th1 and Th2 cell differentiation	83	-0.36923	-1.57374	0.00451232	0.00451232	0.0115167	3157	tags=47%, list=27%, signal=35%	3567/920/4772/6300/4854/1432/3460/3932/3560/3596/5603/3559/4851/3113/27040/7297/3516/3566/3717/3725/915/6778/55534/4775/3459/3593/919/917/3109/3595/5335/864/3551/3108/4790/4094/3115/3119/3122	IL5/CD4/NFATC1/MAPK12/NOTCH3/MAPK14/IFNGR2/LCK/IL2RB/IL13/MAPK13/IL2RA/NOTCH1/HLA-DPA1/LAT/TYK2/RBPJ/IL4R/JAK2/JUN/CD3D/STAT6/MAML3/NFATC3/IFNGR1/IL12B/CD247/CD3G/HLA-DMB/IL12RB2/PLCG1/RUNX3/IKBKB/HLA-DMA/NFKB1/MAF/HLA-DPB1/HLA-DQB1/HLA-DRA
hsa04514	Cell adhesion molecules	122	-0.321351	-1.46384	0.0048583	0.0048583	0.0122321	3243	tags=44%, list=28%, signal=32%	10686/933/3695/959/923/920/6693/1000/10666/8516/3676/1493/3106/942/5802/29851/3105/1013/4756/3113/3107/5788/6614/3133/4099/100506658/4359/1364/6402/3135/7412/999/5789/3134/9672/1003/5175/23562/940/3689/58494/6404/3109/3108/1365/3684/3683/50848/3115/3384/6401/3119/24146/3122	CLDN16/CD22/ITGB7/CD40LG/CD6/CD4/SPN/CDH2/CD226/ITGA8/ITGA4/CTLA4/HLA-B/CD86/PTPRS/ICOS/HLA-A/CDH15/NEO1/HLA-DPA1/HLA-C/PTPRC/SIGLEC1/HLA-E/MAG/OCLN/MPZ/CLDN4/SELL/HLA-G/VCAM1/CDH1/PTPRD/HLA-F/SDC3/CDH5/PECAM1/CLDN14/CD28/ITGB2/JAM2/SELPLG/HLA-DMB/HLA-DMA/CLDN3/ITGAM/ITGAL/F11R/HLA-DPB1/ICAM2/SELE/HLA-DQB1/CLDN15/HLA-DRA
hsa04630	JAK-STAT signaling pathway	145	-0.313673	-1.46948	0.00525855	0.00525855	0.0130633	2872	tags=38%, list=24%, signal=29%	3562/3589/3460/3560/59067/30837/5159/1026/3596/3586/5008/3441/3574/8651/6774/5777/10379/3952/3559/2033/1950/3454/5155/896/3568/29949/3578/7297/51561/3601/1438/3566/1437/3581/4352/3717/3445/6778/3563/50615/1441/3459/2688/4170/3597/3588/3570/3593/3439/3600/3595/9466/7066/5618/3587	IL3/IL11/IFNGR2/IL2RB/IL21/SOCS7/PDGFRB/CDKN1A/IL13/IL10/OSM/IFNA4/IL7/SOCS1/STAT3/PTPN6/IRF9/LEP/IL2RA/EP300/EGF/IFNAR1/PDGFB/CCND3/IL5RA/IL19/IL9/TYK2/IL23A/IL15RA/CSF2RA/IL4R/CSF2/IL9R/MPL/JAK2/IFNA8/STAT6/IL3RA/IL21R/CSF3R/IFNGR1/GH1/MCL1/IL13RA1/IL10RB/IL6R/IL12B/IFNA1/IL15/IL12RB2/IL27RA/THPO/PRLR/IL10RA
hsa04742	Taste transduction	60	0.468714	1.6398	0.00547661	0.00547661	0.0133694	669	tags=13%, list=6%, signal=13%	9568/2911/2554/5332/6328/2550/1131/2558	GABBR2/GRM1/GABRA1/PLCB4/SCN3A/GABBR1/CHRM3/GABRA5
hsa04216	Ferroptosis	36	0.545789	1.7286	0.00558125	0.00558125	0.0133694	2178	tags=56%, list=18%, signal=45%	2730/2182/23516/7419/7018/2729/2181/23657/5621/81631/7417/9474/2879/2495/8031/10533/4891/23305/2180/10162	GCLM/ACSL4/SLC39A14/VDAC3/TF/GCLC/ACSL3/SLC7A11/PRNP/MAP1LC3B/VDAC2/ATG5/GPX4/FTH1/NCOA4/ATG7/SLC11A2/ACSL6/ACSL1/LPCAT3
hsa05110	Vibrio cholerae infection	42	0.52201	1.71034	0.00559701	0.00559701	0.0133694	1474	tags=40%, list=13%, signal=36%	534/523/526/115/2778/527/51606/9550/51382/529/535/9114/55176/155066/109/528/537	ATP6V1G2/ATP6V1A/ATP6V1B2/ADCY9/GNAS/ATP6V0C/ATP6V1H/ATP6V1G1/ATP6V1D/ATP6V1E1/ATP6V0A1/ATP6V0D1/SEC61A2/ATP6V0E2/ADCY3/ATP6V1C1/ATP6AP1
hsa04914	Progesterone-mediated oocyte maturation	76	0.440267	1.60115	0.00628482	0.00628482	0.0148223	1811	tags=29%, list=15%, signal=25%	5601/115/5291/8503/22849/107/3845/5594/5604/6197/10000/25847/996/8900/5602/109/108/5595/8379/5567/5290/891	MAPK9/ADCY9/PIK3CB/PIK3R3/CPEB3/ADCY1/KRAS/MAPK1/MAP2K1/RPS6KA3/AKT3/ANAPC13/CDC27/CCNA1/MAPK10/ADCY3/ADCY2/MAPK3/MAD1L1/PRKACB/PIK3CA/CCNB1
hsa04927	Cortisol synthesis and secretion	56	0.472762	1.63216	0.00645161	0.00645161	0.0150255	2329	tags=39%, list=20%, signal=32%	5332/115/2778/107/185/8911/3777/3708/5087/1385/109/108/23236/8622/183/4158/5567/949/8913/1386/114/5566	PLCB4/ADCY9/GNAS/ADCY1/AGTR1/CACNA1I/KCNK3/ITPR1/PBX1/CREB1/ADCY3/ADCY2/PLCB1/PDE8B/AGT/MC2R/PRKACB/SCARB1/CACNA1G/ATF2/ADCY8/PRKACA
hsa04962	Vasopressin-regulated water reabsorption	39	0.523164	1.68617	0.00755668	0.00755668	0.0169514	2435	tags=51%, list=21%, signal=41%	1780/398/115/2778/51164/6844/1778/361/5868/51143/1385/109/8766/5567/10540/8655/5869/551/5566/9230	DYNC1I1/ARHGDIG/ADCY9/GNAS/DCTN4/VAMP2/DYNC1H1/AQP4/RAB5A/DYNC1LI1/CREB1/ADCY3/RAB11A/PRKACB/DCTN2/DYNLL1/RAB5B/AVP/PRKACA/RAB11B
hsa04915	Estrogen signaling pathway	117	0.393263	1.52975	0.00760608	0.00760608	0.0169514	1804	tags=24%, list=15%, signal=20%	9568/2911/5332/1956/115/2550/2778/5291/8503/3763/107/3845/2775/5594/3708/5604/10000/3765/1385/109/108/2289/23236/5595/5567/2885/5290/1509	GABBR2/GRM1/PLCB4/EGFR/ADCY9/GABBR1/GNAS/PIK3CB/PIK3R3/KCNJ6/ADCY1/KRAS/GNAO1/MAPK1/ITPR1/MAP2K1/AKT3/KCNJ9/CREB1/ADCY3/ADCY2/FKBP5/PLCB1/MAPK3/PRKACB/GRB2/PIK3CA/CTSD
hsa04726	Serotonergic synapse	95	0.414813	1.56132	0.00760614	0.00760614	0.0169514	1711	tags=24%, list=15%, signal=21%	3358/5332/2785/1644/3751/2778/3763/4129/3845/2775/5594/6571/3708/5604/10681/3765/2782/23236/8605/5595/351/5567/2790	HTR2C/PLCB4/GNG3/DDC/KCND2/GNAS/KCNJ6/MAOB/KRAS/GNAO1/MAPK1/SLC18A2/ITPR1/MAP2K1/GNB5/KCNJ9/GNB1/PLCB1/PLA2G4C/MAPK3/APP/PRKACB/GNG10
hsa04022	cGMP-PKG signaling pathway	145	0.374296	1.49462	0.00764249	0.00764249	0.0169514	1576	tags=26%, list=13%, signal=23%	5332/491/115/291/1910/5532/483/5530/7419/107/292/185/7416/5594/481/489/3708/5604/488/6543/10000/490/9475/476/3667/1385/482/493/477/109/108/5501/23236/5500/7417/5595/572/293	PLCB4/ATP2B2/ADCY9/SLC25A4/EDNRB/PPP3CB/ATP1B3/PPP3CA/VDAC3/ADCY1/SLC25A5/AGTR1/VDAC1/MAPK1/ATP1B1/ATP2A3/ITPR1/MAP2K1/ATP2A2/SLC8A2/AKT3/ATP2B1/ROCK2/ATP1A1/IRS1/CREB1/ATP1B2/ATP2B4/ATP1A2/ADCY3/ADCY2/PPP1CC/PLCB1/PPP1CB/VDAC2/MAPK3/BAD/SLC25A6
hsa04919	Thyroid hormone signaling pathway	112	0.397295	1.53439	0.00794399	0.00794399	0.0174128	2384	tags=30%, list=20%, signal=24%	5332/5214/10231/5213/5291/8503/483/3845/5594/481/489/5604/488/10000/3091/3685/6009/476/482/477/23236/9440/5595/572/7249/5567/5290/29079/5333/53919/60/5566/3265/5208	PLCB4/PFKP/RCAN2/PFKM/PIK3CB/PIK3R3/ATP1B3/KRAS/MAPK1/ATP1B1/ATP2A3/MAP2K1/ATP2A2/AKT3/HIF1A/ITGAV/RHEB/ATP1A1/ATP1B2/ATP1A2/PLCB1/MED17/MAPK3/BAD/TSC2/PRKACB/PIK3CA/MED4/PLCD1/SLCO1C1/ACTB/PRKACA/HRAS/PFKFB2
hsa04612	Antigen processing and presentation	64	-0.392272	-1.58929	0.00815303	0.00815303	0.0176632	2781	tags=42%, list=24%, signal=32%	920/3824/3305/5994/3106/5720/3811/3802/3809/3105/1508/3805/3113/3107/3133/3135/5641/3808/3134/3109/6890/3310/3108/3115/1520/3119/3122	CD4/KLRD1/HSPA1L/RFXAP/HLA-B/PSME1/KIR3DL1/KIR2DL1/KIR2DS4/HLA-A/CTSB/KIR2DL4/HLA-DPA1/HLA-C/HLA-E/HLA-G/LGMN/KIR2DS3/HLA-F/HLA-DMB/TAP1/HSPA6/HLA-DMA/HLA-DPB1/CTSS/HLA-DQB1/HLA-DRA
hsa02010	ABC transporters	36	-0.47222	-1.68526	0.00830876	0.00830876	0.0176988	1743	tags=42%, list=15%, signal=36%	64240/225/6833/10257/24/5243/22/8714/215/9429/19/1080/6890/1244/10351	ABCG5/ABCD2/ABCC8/ABCC4/ABCA4/ABCB1/ABCB7/ABCC3/ABCD1/ABCG2/ABCA1/CFTR/TAP1/ABCC2/ABCA8
hsa05169	Epstein-Barr virus infection	190	-0.287092	-1.39524	0.00835946	0.00835946	0.0176988	2167	tags=29%, list=18%, signal=24%	842/22938/3454/896/57506/3113/3107/4734/3627/7297/3133/5971/3516/5609/7097/2208/355/578/10018/7188/23586/3445/3280/3135/930/3725/915/9636/3134/4193/581/3065/3439/5336/919/29760/917/7431/3109/6502/6890/864/3551/3665/7128/3108/4790/953/3683/695/3115/6850/4938/3119/3122	CASP9/SNW1/IFNAR1/CCND3/MAVS/HLA-DPA1/HLA-C/NEDD4/CXCL10/TYK2/HLA-E/RELB/RBPJ/MAP2K7/TLR2/FCER2/FAS/BAK1/BCL2L11/TRAF5/DDX58/IFNA8/HES1/HLA-G/CD19/JUN/CD3D/ISG15/HLA-F/MDM2/BAX/HDAC1/IFNA1/PLCG2/CD247/BLNK/CD3G/VIM/HLA-DMB/SKP2/TAP1/RUNX3/IKBKB/IRF7/TNFAIP3/HLA-DMA/NFKB1/ENTPD1/ITGAL/BTK/HLA-DPB1/SYK/OAS1/HLA-DQB1/HLA-DRA
hsa05416	Viral myocarditis	54	-0.413837	-1.62193	0.00864382	0.00864382	0.0180953	3192	tags=52%, list=27%, signal=38%	959/6443/6442/637/3908/3106/942/3105/842/3113/3107/6445/3133/5880/1605/3135/5551/3134/4624/940/3689/3109/857/3108/3683/3115/3119/3122	CD40LG/SGCB/SGCA/BID/LAMA2/HLA-B/CD86/HLA-A/CASP9/HLA-DPA1/HLA-C/SGCG/HLA-E/RAC2/DAG1/HLA-G/PRF1/HLA-F/MYH6/CD28/ITGB2/HLA-DMB/CAV1/HLA-DMA/ITGAL/HLA-DPB1/HLA-DQB1/HLA-DRA
hsa04744	Phototransduction	23	-0.531159	-1.69737	0.00908644	0.00908644	0.0188057	2554	tags=43%, list=22%, signal=34%	2779/8787/1259/2978/5158/6295/2792/9187/5957/91860	GNAT1/RGS9/CNGA1/GUCA1A/PDE6B/SAG/GNGT1/SLC24A1/RCVRN/CALML4
hsa00030	Pentose phosphate pathway	25	0.580301	1.69962	0.00918504	0.00918504	0.0188057	1369	tags=32%, list=12%, signal=28%	5214/5213/5631/5236/2821/230/226/7086	PFKP/PFKM/PRPS1/PGM1/GPI/ALDOC/ALDOA/TKT
hsa04973	Carbohydrate digestion and absorption	36	0.52616	1.66643	0.0100462	0.0100462	0.0203454	1868	tags=36%, list=16%, signal=30%	5332/3098/5291/8503/483/481/10000/476/482/477/23236/5290/3099	PLCB4/HK1/PIK3CB/PIK3R3/ATP1B3/ATP1B1/AKT3/ATP1A1/ATP1B2/ATP1A2/PLCB1/PIK3CA/HK2
hsa04912	GnRH signaling pathway	80	0.420405	1.53937	0.0119132	0.0119132	0.0238669	1747	tags=28%, list=15%, signal=24%	5332/1956/5601/6416/115/2778/107/816/3845/5594/3708/5604/5602/109/108/23236/8605/818/5595/5567/2885/2002	PLCB4/EGFR/MAPK9/MAP2K4/ADCY9/GNAS/ADCY1/CAMK2B/KRAS/MAPK1/ITPR1/MAP2K1/MAPK10/ADCY3/ADCY2/PLCB1/PLA2G4C/CAMK2G/MAPK3/PRKACB/GRB2/ELK1
hsa04066	HIF-1 signaling pathway	102	0.395857	1.50916	0.012132	0.012132	0.0240465	1868	tags=26%, list=16%, signal=22%	5214/3939/1956/2026/3945/3098/5213/5291/8503/5230/816/5594/5604/10000/8569/3091/7018/2023/230/226/5162/818/5595/1977/2597/5290/3099	PFKP/LDHA/EGFR/ENO2/LDHB/HK1/PFKM/PIK3CB/PIK3R3/PGK1/CAMK2B/MAPK1/MAP2K1/AKT3/MKNK1/HIF1A/TF/ENO1/ALDOC/ALDOA/PDHB/CAMK2G/MAPK3/EIF4E/GAPDH/PIK3CA/HK2
hsa04623	Cytosolic DNA-sensing pathway	51	-0.409058	-1.58645	0.0133877	0.0133877	0.026081	1301	tags=25%, list=11%, signal=23%	23586/3445/5435/81030/6352/3439/834/29108/6351/3551/3665/4790/3606	DDX58/IFNA8/POLR2F/ZBP1/CCL5/IFNA1/CASP1/PYCARD/CCL4/IKBKB/IRF7/NFKB1/IL18
hsa05152	Tuberculosis	161	-0.285802	-1.3581	0.0134384	0.0134384	0.026081	1529	tags=21%, list=13%, signal=19%	51561/7097/2207/22925/3717/50617/3445/10892/7132/1263/3459/581/3588/3593/64127/3439/10312/3689/3109/3108/3684/4790/91860/9103/2213/3606/3115/3587/8915/6850/2212/1520/3119/3122	IL23A/TLR2/FCER1G/PLA2R1/JAK2/ATP6V0A4/IFNA8/MALT1/TNFRSF1A/PLK3/IFNGR1/BAX/IL10RB/IL12B/NOD2/IFNA1/TCIRG1/ITGB2/HLA-DMB/HLA-DMA/ITGAM/NFKB1/CALML4/FCGR2C/FCGR2B/IL18/HLA-DPB1/IL10RA/BCL10/SYK/FCGR2A/CTSS/HLA-DQB1/HLA-DRA
hsa04120	Ubiquitin mediated proteolysis	118	0.380288	1.48133	0.0140019	0.0140019	0.0268945	2930	tags=40%, list=25%, signal=30%	4591/9063/26232/7314/22954/25847/10477/996/27338/9039/11059/9040/55585/27339/7326/8924/6500/55120/51366/55236/7329/7322/7324/25898/8452/51465/7337/10273/8945/7323/8453/7317/3093/23327/8697/7321/7320/10055/9690/997/29882/8925/9354/10277/8065/23291/1642	TRIM37/PIAS2/FBXO2/UBB/TRIM32/ANAPC13/UBE2E3/CDC27/UBE2S/UBA3/WWP1/UBE2M/UBE2Q1/PRPF19/UBE2G1/HERC2/SKP1/FANCL/UBR5/UBA6/UBE2I/UBE2D2/UBE2E1/RCHY1/CUL3/UBE2J1/UBE3A/STUB1/BTRC/UBE2D3/CUL2/UBA1/UBE2K/NEDD4L/CDC23/UBE2D1/UBE2B/SAE1/UBE3C/CDC34/ANAPC2/HERC1/UBE4A/UBE4B/CUL5/FBXW11/DDB1
hsa05323	Rheumatoid arthritis	79	-0.348629	-1.47411	0.0146658	0.0146658	0.0278823	1529	tags=32%, list=13%, signal=28%	51561/7097/3576/1437/50617/8741/3725/54/4312/6352/940/2920/3600/10312/3689/3109/3108/3605/3683/3606/2919/3115/6387/3119/3122	IL23A/TLR2/CXCL8/CSF2/ATP6V0A4/TNFSF13/JUN/ACP5/MMP1/CCL5/CD28/CXCL2/IL15/TCIRG1/ITGB2/HLA-DMB/HLA-DMA/IL17A/ITGAL/IL18/CXCL1/HLA-DPB1/CXCL12/HLA-DQB1/HLA-DRA
hsa04960	Aldosterone-regulated sodium reabsorption	34	0.512918	1.60645	0.0167229	0.0167229	0.0314722	1799	tags=35%, list=15%, signal=30%	5291/8503/483/3845/5594/481/476/3667/482/477/5595/5290	PIK3CB/PIK3R3/ATP1B3/KRAS/MAPK1/ATP1B1/ATP1A1/IRS1/ATP1B2/ATP1A2/MAPK3/PIK3CA
hsa00900	Terpenoid backbone biosynthesis	19	0.599334	1.64634	0.0180381	0.0180381	0.0332919	3091	tags=63%, list=26%, signal=47%	3157/3156/3422/51449/23463/4597/38/39/79947/2224/10269/4598	HMGCS1/HMGCR/IDI1/PCYOX1/ICMT/MVD/ACAT1/ACAT2/DHDDS/FDPS/ZMPSTE24/MVK
hsa05202	Transcriptional misregulation in cancer	159	-0.280733	-1.33124	0.0180472	0.0180472	0.0332919	3822	tags=43%, list=32%, signal=30%	7113/5970/26471/4314/3569/4298/51384/1670/6667/2120/8013/64919/7157/171558/5328/9611/3695/890/3207/1671/4353/3562/3560/1053/51513/942/1026/2005/1848/2530/4299/2138/4005/6495/860/5079/2078/3206/5966/904/51274/5468/3576/1436/578/1437/5077/7048/4286/7490/4208/330/4193/2313/581/6929/472/7704/3065/4297/5327/8148/3684/4790/7403/6756/4094/7850/1050	TMPRSS2/RELA/NUPR1/MMP3/IL6/MLLT1/WNT16/DEFA5/SP1/ETV6/NR4A3/BCL11B/TP53/PTCRA/PLAU/NCOR1/ITGB7/CCNA2/HOXA11/DEFA6/MPO/IL3/IL2RB/CEBPE/ETV7/CD86/CDKN1A/ELK4/DUSP6/FUT8/AFF1/EYA1/LMO2/SIX1/RUNX2/PAX5/ERG/HOXA10/REL/CCNT1/KLF3/PPARG/CXCL8/CSF1R/BAK1/CSF2/PAX3/TGFBR2/MITF/WT1/MEF2C/BIRC3/MDM2/FLI1/BAX/TCF3/ATM/ZBTB16/HDAC1/KMT2A/PLAT/TAF15/ITGAM/NFKB1/KDM6A/SSX1/MAF/IL1R2/CEBPA
hsa04137	Mitophagy - animal	60	0.435352	1.52309	0.0187981	0.0187981	0.0343371	2415	tags=42%, list=20%, signal=33%	5601/3845/23710/664/10133/7314/3091/23786/8678/5602/9451/81631/55288/22800/9101/64786/9474/8408/11345/7879/665/10370/3265/1457/79735	MAPK9/KRAS/GABARAPL1/BNIP3/OPTN/UBB/HIF1A/BCL2L13/BECN1/MAPK10/EIF2AK3/MAP1LC3B/RHOT1/RRAS2/USP8/TBC1D15/ATG5/ULK1/GABARAPL2/RAB7A/BNIP3L/CITED2/HRAS/CSNK2A1/TBC1D17
hsa05210	Colorectal cancer	82	0.403031	1.48426	0.0194066	0.0194066	0.0351043	1799	tags=28%, list=15%, signal=24%	1956/5601/10912/26060/5291/8503/54205/3845/5899/1647/5594/324/5604/10000/7040/5879/5602/10297/5595/4087/572/2885/5290	EGFR/MAPK9/GADD45G/APPL1/PIK3CB/PIK3R3/CYCS/KRAS/RALB/GADD45A/MAPK1/APC/MAP2K1/AKT3/TGFB1/RAC1/MAPK10/APC2/MAPK3/SMAD2/BAD/GRB2/PIK3CA
hsa04670	Leukocyte transendothelial migration	99	-0.322633	-1.41948	0.0200594	0.0200594	0.0359364	1471	tags=26%, list=12%, signal=23%	5880/100506658/5829/1364/7412/1536/1003/5175/4689/6093/10398/23562/7409/5336/3689/58494/5335/81/653361/1365/3684/3683/50848/7852/6387/24146	RAC2/OCLN/PXN/CLDN4/VCAM1/CYBB/CDH5/PECAM1/NCF4/ROCK1/MYL9/CLDN14/VAV1/PLCG2/ITGB2/JAM2/PLCG1/ACTN4/NCF1/CLDN3/ITGAM/ITGAL/F11R/CXCR4/CXCL12/CLDN15
hsa05030	Cocaine addiction	41	0.480691	1.56721	0.0208788	0.0208788	0.0367044	1701	tags=29%, list=14%, signal=25%	8851/7054/1644/1020/2778/4129/6571/2891/1385/2902/6531/5567	CDK5R1/TH/DDC/CDK5/GNAS/MAOB/SLC18A2/GRIA2/CREB1/GRIN1/SLC6A3/PRKACB
hsa00360	Phenylalanine metabolism	13	0.656168	1.64297	0.0208821	0.0208821	0.0367044	551	tags=38%, list=5%, signal=37%	2805/1644/4129/2806/4282	GOT1/DDC/MAOB/GOT2/MIF
hsa05144	Malaria	44	-0.403903	-1.51038	0.021978	0.021978	0.0378993	2628	tags=36%, list=22%, signal=28%	4615/2994/3586/3082/7057/948/7097/3576/7412/5175/3689/3683/3606/6401/2993/2995	MYD88/GYPB/IL10/HGF/THBS1/CD36/TLR2/CXCL8/VCAM1/PECAM1/ITGB2/ITGAL/IL18/SELE/GYPA/GYPC
hsa05120	Epithelial cell signaling in Helicobacter pylori infection	64	0.424315	1.49875	0.0221635	0.0221635	0.0378993	1474	tags=31%, list=13%, signal=27%	534/523/1956/5601/526/6416/527/51606/9550/51382/1147/529/535/9114/5879/5602/155066/5803/528/537	ATP6V1G2/ATP6V1A/EGFR/MAPK9/ATP6V1B2/MAP2K4/ATP6V0C/ATP6V1H/ATP6V1G1/ATP6V1D/CHUK/ATP6V1E1/ATP6V0A1/ATP6V0D1/RAC1/MAPK10/ATP6V0E2/PTPRZ1/ATP6V1C1/ATP6AP1
hsa03060	Protein export	18	0.599976	1.62696	0.0221722	0.0221722	0.0378993	1334	tags=50%, list=11%, signal=44%	28972/6728/6731/55176/9789/6727/6729/6726/58477	SPCS1/SRP19/SRP72/SEC61A2/SPCS2/SRP14/SRP54/SRP9/SRPRB
hsa04935	Growth hormone synthesis, secretion and action	109	0.371916	1.43016	0.0252737	0.0252737	0.0428081	1799	tags=23%, list=15%, signal=20%	5332/6750/5601/6416/115/2778/5291/8503/107/3845/5594/3708/5604/10000/3486/3667/5602/1385/109/108/23236/5595/5567/2885/5290	PLCB4/SST/MAPK9/MAP2K4/ADCY9/GNAS/PIK3CB/PIK3R3/ADCY1/KRAS/MAPK1/ITPR1/MAP2K1/AKT3/IGFBP3/IRS1/MAPK10/CREB1/ADCY3/ADCY2/PLCB1/MAPK3/PRKACB/GRB2/PIK3CA
hsa05212	Pancreatic cancer	74	0.405818	1.46784	0.0256336	0.0256336	0.0428207	1550	tags=24%, list=13%, signal=21%	1956/5601/10912/5291/8503/3845/5899/1647/5594/1147/5604/10000/7040/5879/5602/5595/4087/572	EGFR/MAPK9/GADD45G/PIK3CB/PIK3R3/KRAS/RALB/GADD45A/MAPK1/CHUK/MAP2K1/AKT3/TGFB1/RAC1/MAPK10/MAPK3/SMAD2/BAD
hsa04380	Osteoclast differentiation	123	-0.294293	-1.34296	0.0258481	0.0258481	0.0428207	3051	tags=40%, list=26%, signal=30%	11025/1435/4772/6300/10288/1432/3460/3932/10859/27035/3937/5603/8651/10379/3690/10990/10326/4688/3454/11024/7297/5971/5609/5468/1436/11006/4982/11026/7048/4286/7132/3725/54/3459/4689/5336/29760/3551/653361/4790/695/7305/9103/2213/11027/6850/2212/23547/54209	LILRB3/CSF1/NFATC1/MAPK12/LILRB2/MAPK14/IFNGR2/LCK/LILRB1/NOX1/LCP2/MAPK13/SOCS1/IRF9/ITGB3/LILRB5/SIRPB1/NCF2/IFNAR1/LILRA1/TYK2/RELB/MAP2K7/PPARG/CSF1R/LILRB4/TNFRSF11B/LILRA3/TGFBR2/MITF/TNFRSF1A/JUN/ACP5/IFNGR1/NCF4/PLCG2/BLNK/IKBKB/NCF1/NFKB1/BTK/TYROBP/FCGR2C/FCGR2B/LILRA2/SYK/FCGR2A/LILRA4/TREM2
hsa05340	Primary immunodeficiency	33	-0.439682	-1.53652	0.0259706	0.0259706	0.0428207	3309	tags=48%, list=28%, signal=35%	4261/959/920/3932/5994/29851/57379/100/5788/64421/930/915/29760/6890/5896/695	CIITA/CD40LG/CD4/LCK/RFXAP/ICOS/AICDA/ADA/PTPRC/DCLRE1C/CD19/CD3D/BLNK/TAP1/RAG1/BTK
hsa00630	Glyoxylate and dicarboxylate metabolism	22	0.564697	1.60915	0.0265427	0.0265427	0.04338	1201	tags=32%, list=10%, signal=29%	4190/1738/1431/50/4191/2752/48	MDH1/DLD/CS/ACO2/MDH2/GLUL/ACO1
hsa00062	Fatty acid elongation	14	0.626924	1.60394	0.0278369	0.0278369	0.0450996	3039	tags=71%, list=26%, signal=53%	11332/6785/3032/51144/5538/60481/3033/51102/54898/9524	ACOT7/ELOVL4/HADHB/HSD17B12/PPT1/ELOVL5/HADH/MECR/ELOVL2/TECR
hsa04750	Inflammatory mediator regulation of TRP channels	82	0.393174	1.44796	0.0288286	0.0288286	0.0461506	1452	tags=23%, list=12%, signal=20%	3358/5332/5601/115/2778/5291/8503/107/816/3708/5602/109/108/5501/23236/5500/8605/40/818	HTR2C/PLCB4/MAPK9/ADCY9/GNAS/PIK3CB/PIK3R3/ADCY1/CAMK2B/ITPR1/MAPK10/ADCY3/ADCY2/PPP1CC/PLCB1/PPP1CB/PLA2G4C/ASIC2/CAMK2G
hsa03050	Proteasome	41	0.469083	1.52936	0.028981	0.028981	0.0461506	2790	tags=59%, list=24%, signal=45%	5718/10197/5682/5709/5707/5706/5689/5713/51371/5690/9861/5705/10213/5694/5701/5684/5717/5685/5695/11047/5693/5708/5686/5700	PSMD12/PSME3/PSMA1/PSMD3/PSMD1/PSMC6/PSMB1/PSMD7/POMP/PSMB2/PSMD6/PSMC5/PSMD14/PSMB6/PSMC2/PSMA3/PSMD11/PSMA4/PSMB7/ADRM1/PSMB5/PSMD2/PSMA5/PSMC1
hsa05213	Endometrial cancer	55	0.42843	1.47449	0.0311372	0.0311372	0.049164	2387	tags=40%, list=20%, signal=32%	1956/10912/5291/8503/1496/3845/1647/5594/324/5604/10000/10297/5595/572/2885/2002/5290/6934/6654/3265/83439/1495	EGFR/GADD45G/PIK3CB/PIK3R3/CTNNA2/KRAS/GADD45A/MAPK1/APC/MAP2K1/AKT3/APC2/MAPK3/BAD/GRB2/ELK1/PIK3CA/TCF7L2/SOS1/HRAS/TCF7L1/CTNNA1
hsa05225	Hepatocellular carcinoma	145	0.343246	1.37063	0.032513	0.032513	0.0509048	2510	tags=28%, list=21%, signal=23%	1956/10912/4259/51412/5291/8503/6604/3845/6597/1647/5594/324/5604/10587/2947/10000/2941/7040/2944/2953/10297/5595/4087/572/23401/2946/2885/2002/5290/1452/6595/6934/9446/7296/6654/60/3265/83439/7471/8321/53358	EGFR/GADD45G/MGST3/ACTL6B/PIK3CB/PIK3R3/SMARCD3/KRAS/SMARCA4/GADD45A/MAPK1/APC/MAP2K1/TXNRD2/GSTM3/AKT3/GSTA4/TGFB1/GSTM1/GSTT2/APC2/MAPK3/SMAD2/BAD/FRAT2/GSTM2/GRB2/ELK1/PIK3CA/CSNK1A1/SMARCA2/TCF7L2/GSTO1/TXNRD1/SOS1/ACTB/HRAS/TCF7L1/WNT1/FZD1/SHC3
hsa05100	Bacterial invasion of epithelial cells	64	0.413594	1.46089	0.0330251	0.0330251	0.0512758	1280	tags=20%, list=11%, signal=18%	1759/26052/1213/5291/8503/1496/8936/1212/57180/5879/10552/10096/10097	DNM1/DNM3/CLTC/PIK3CB/PIK3R3/CTNNA2/WASF1/CLTB/ACTR3B/RAC1/ARPC1A/ACTR3/ACTR2
hsa00650	Butanoate metabolism	22	0.547914	1.56132	0.0344886	0.0344886	0.0531055	2171	tags=45%, list=18%, signal=37%	2571/2572/3157/7915/5019/18/65985/622/38/39	GAD1/GAD2/HMGCS1/ALDH5A1/OXCT1/ABAT/AACS/BDH1/ACAT1/ACAT2
hsa04650	Natural killer cell mediated cytotoxicity	111	-0.296966	-1.33595	0.0354391	0.0354391	0.0541219	3044	tags=40%, list=26%, signal=30%	4772/3824/637/3448/259197/3460/3932/3106/3811/3802/3809/3937/3441/5777/3105/3454/27040/3107/3133/9437/5880/962/2207/355/1437/3445/3135/3808/5551/3459/4277/100507436/7409/3439/5336/919/3689/5335/8795/3683/7305/8743/3384/6850	NFATC1/KLRD1/BID/IFNA14/NCR3/IFNGR2/LCK/HLA-B/KIR3DL1/KIR2DL1/KIR2DS4/LCP2/IFNA4/PTPN6/HLA-A/IFNAR1/LAT/HLA-C/HLA-E/NCR1/RAC2/CD48/FCER1G/FAS/CSF2/IFNA8/HLA-G/KIR2DS3/PRF1/IFNGR1/MICB/MICA/VAV1/IFNA1/PLCG2/CD247/ITGB2/PLCG1/TNFRSF10B/ITGAL/TYROBP/TNFSF10/ICAM2/SYK
hsa04071	Sphingolipid signaling pathway	107	0.36271	1.39109	0.0360727	0.0360727	0.0546416	2190	tags=29%, list=19%, signal=24%	5332/5601/253782/5291/8503/3845/5527/5515/5594/5604/10000/5590/9475/5518/5879/5602/81537/23236/6609/55012/5595/5290/1509/5521/5516/56848/5881/5528/8560/7124/10672	PLCB4/MAPK9/CERS6/PIK3CB/PIK3R3/KRAS/PPP2R5C/PPP2CA/MAPK1/MAP2K1/AKT3/PRKCZ/ROCK2/PPP2R1A/RAC1/MAPK10/SGPP1/PLCB1/SMPD1/PPP2R3C/MAPK3/PIK3CA/CTSD/PPP2R2B/PPP2CB/SPHK2/RAC3/PPP2R5D/DEGS1/TNF/GNA13
hsa04970	Salivary secretion	75	0.392524	1.42494	0.0372386	0.0372386	0.0559528	1387	tags=24%, list=12%, signal=21%	5332/491/115/2778/483/1131/107/6844/481/3708/490/476/482/493/477/109/108/23236	PLCB4/ATP2B2/ADCY9/GNAS/ATP1B3/CHRM3/ADCY1/VAMP2/ATP1B1/ITPR1/ATP2B1/ATP1A1/ATP1B2/ATP2B4/ATP1A2/ADCY3/ADCY2/PLCB1
hsa01212	Fatty acid metabolism	44	0.447094	1.47819	0.0376569	0.0376569	0.0561286	3039	tags=50%, list=26%, signal=37%	6785/2194/2182/27349/3032/2181/31/34/51144/38/23305/2180/39/5538/60481/6342/3033/1374/84869/51102/54898/9524	ELOVL4/FASN/ACSL4/MCAT/HADHB/ACSL3/ACACA/ACADM/HSD17B12/ACAT1/ACSL6/ACSL1/ACAT2/PPT1/ELOVL5/SCP2/HADH/CPT1A/CBR4/MECR/ELOVL2/TECR
hsa00280	Valine, leucine and isoleucine degradation	41	0.458216	1.49393	0.0387971	0.0387971	0.0566578	2177	tags=39%, list=18%, signal=32%	549/1738/3157/5019/3032/18/27034/34/586/65985/224/217/38/64087/39/26275	AUH/DLD/HMGCS1/OXCT1/HADHB/ABAT/ACAD8/ACADM/BCAT1/AACS/ALDH3A2/ALDH2/ACAT1/MCCC2/ACAT2/HIBCH
hsa00100	Steroid biosynthesis	19	0.561342	1.54198	0.0389967	0.0389967	0.0566578	659	tags=26%, list=6%, signal=25%	6713/6307/6309/1717/1718	SQLE/MSMO1/SC5D/DHCR7/DHCR24
hsa04928	Parathyroid hormone synthesis, secretion and action	95	0.370281	1.3937	0.0389988	0.0389988	0.0566578	2329	tags=28%, list=20%, signal=23%	5332/5141/1956/115/2778/107/5594/3708/5604/2625/4929/1385/109/3727/5144/108/23236/5595/8600/5567/408/9826/1386/10672/5142/114/5566	PLCB4/PDE4A/EGFR/ADCY9/GNAS/ADCY1/MAPK1/ITPR1/MAP2K1/GATA3/NR4A2/CREB1/ADCY3/JUND/PDE4D/ADCY2/PLCB1/MAPK3/TNFSF11/PRKACB/ARRB1/ARHGEF11/ATF2/GNA13/PDE4B/ADCY8/PRKACA
hsa04062	Chemokine signaling pathway	167	-0.265111	-1.26577	0.0392435	0.0392435	0.0566578	1606	tags=23%, list=14%, signal=20%	5880/6366/1232/3576/6360/5829/3717/1234/113/6373/6362/6354/5294/2309/6093/7409/6352/5336/3055/2920/2833/1235/6351/2792/5568/6375/5335/3551/653361/4790/6363/112/7852/2268/2919/3579/6368/6387/1794	RAC2/CCL21/CCR3/CXCL8/CCL16/PXN/JAK2/CCR5/ADCY7/CXCL11/CCL18/CCL7/PIK3CG/FOXO3/ROCK1/VAV1/CCL5/PLCG2/HCK/CXCL2/CXCR3/CCR6/CCL4/GNGT1/PRKACG/XCL1/PLCG1/IKBKB/NCF1/NFKB1/CCL19/ADCY6/CXCR4/FGR/CXCL1/CXCR2/CCL23/CXCL12/DOCK2
hsa04934	Cushing syndrome	133	0.344144	1.36107	0.0395324	0.0395324	0.0566578	2090	tags=26%, list=18%, signal=21%	5332/1956/115/2778/107/816/185/8911/5594/324/3777/3708/5604/5087/4221/1385/109/108/10297/23236/9101/8622/818/5595/183/9070/4158/5567/1394/2271/949/8913/6934/1386	PLCB4/EGFR/ADCY9/GNAS/ADCY1/CAMK2B/AGTR1/CACNA1I/MAPK1/APC/KCNK3/ITPR1/MAP2K1/PBX1/MEN1/CREB1/ADCY3/ADCY2/APC2/PLCB1/USP8/PDE8B/CAMK2G/MAPK3/AGT/ASH2L/MC2R/PRKACB/CRHR1/FH/SCARB1/CACNA1G/TCF7L2/ATF2
hsa05417	Lipid and atherosclerosis	192	-0.255762	-1.24521	0.0403776	0.0403776	0.0574273	1594	tags=22%, list=14%, signal=19%	5609/5468/7097/5451/3576/355/114548/3717/3445/7132/3725/7412/1536/4775/25833/581/4689/338/4312/7409/6352/3593/3439/19/2920/834/29108/22926/5335/8795/3310/3551/3665/653361/4790/91860/8743/3606/23643/2919/7184/6401	MAP2K7/PPARG/TLR2/POU2F1/CXCL8/FAS/NLRP3/JAK2/IFNA8/TNFRSF1A/JUN/VCAM1/CYBB/NFATC3/POU2F3/BAX/NCF4/APOB/MMP1/VAV1/CCL5/IL12B/IFNA1/ABCA1/CXCL2/CASP1/PYCARD/ATF6/PLCG1/TNFRSF10B/HSPA6/IKBKB/IRF7/NCF1/NFKB1/CALML4/TNFSF10/IL18/LY96/CXCL1/HSP90B1/SELE
hsa05211	Renal cell carcinoma	63	0.406526	1.43409	0.0415995	0.0415995	0.058717	2356	tags=32%, list=20%, signal=26%	5291/8503/3845/5594/5604/10000/3091/5063/7040/5879/5595/572/2885/5781/5290/2271/54583/8453/6654/3265	PIK3CB/PIK3R3/KRAS/MAPK1/MAP2K1/AKT3/HIF1A/PAK3/TGFB1/RAC1/MAPK3/BAD/GRB2/PTPN11/PIK3CA/FH/EGLN1/CUL2/SOS1/HRAS
hsa04950	Maturity onset diabetes of the young	22	-0.474541	-1.49443	0.0440313	0.0440313	0.0616822	4609	tags=68%, list=39%, signal=42%	50674/6927/5078/3630/3651/3174/3375/6514/4821/3175/5313/4825/5080/3280/2494	NEUROG3/HNF1A/PAX4/INS/PDX1/HNF4G/IAPP/SLC2A2/NKX2-2/ONECUT1/PKLR/NKX6-1/PAX6/HES1/NR5A2
hsa04012	ErbB signaling pathway	78	0.383549	1.40087	0.0447825	0.0447825	0.0622663	1799	tags=24%, list=15%, signal=21%	1956/5601/6416/5291/8503/816/3845/5594/5604/10000/5063/5602/818/5595/572/2066/2885/2002/5290	EGFR/MAPK9/MAP2K4/PIK3CB/PIK3R3/CAMK2B/KRAS/MAPK1/MAP2K1/AKT3/PAK3/MAPK10/CAMK2G/MAPK3/BAD/ERBB4/GRB2/ELK1/PIK3CA
hsa00350	Tyrosine metabolism	31	0.4847	1.4875	0.0457227	0.0457227	0.0625345	551	tags=19%, list=5%, signal=18%	2805/7054/1644/4129/2806/4282	GOT1/TH/DDC/MAOB/GOT2/MIF
hsa04371	Apelin signaling pathway	117	0.349838	1.36083	0.0463037	0.0463037	0.0625345	2356	tags=31%, list=20%, signal=25%	5332/2785/115/10891/107/3845/185/6262/5594/3708/5604/10681/6543/10000/30849/8678/109/2782/81631/108/22800/23236/5595/4087/5567/2790/51422/56848/801/6696/10672/5571/2783/114/5566/3265	PLCB4/GNG3/ADCY9/PPARGC1A/ADCY1/KRAS/AGTR1/RYR2/MAPK1/ITPR1/MAP2K1/GNB5/SLC8A2/AKT3/PIK3R4/BECN1/ADCY3/GNB1/MAP1LC3B/ADCY2/RRAS2/PLCB1/MAPK3/SMAD2/PRKACB/GNG10/PRKAG2/SPHK2/CALM1/SPP1/GNA13/PRKAG1/GNB2/ADCY8/PRKACA/HRAS
hsa04392	Hippo signaling pathway - multiple species	21	-0.480362	-1.49538	0.0463097	0.0463097	0.0625345	3227	tags=48%, list=27%, signal=35%	60485/11186/54798/6788/8994/7005/7004/1454/79633/9113	SAV1/RASSF1/DCHS2/STK3/LIMD1/TEAD3/TEAD4/CSNK1E/FAT4/LATS1
hsa04662	B cell receptor signaling pathway	76	-0.322633	-1.35417	0.0463179	0.0463179	0.0625345	1435	tags=29%, list=12%, signal=26%	11006/27071/11026/10892/930/3725/4775/25780/7409/5336/29760/974/8519/3551/4790/695/2213/11027/971/8915/6850/23547	LILRB4/DAPP1/LILRA3/MALT1/CD19/JUN/NFATC3/RASGRP3/VAV1/PLCG2/BLNK/CD79B/IFITM1/IKBKB/NFKB1/BTK/FCGR2B/LILRA2/CD72/BCL10/SYK/LILRA4
hsa04152	AMPK signaling pathway	105	0.356012	1.36214	0.0486347	0.0486347	0.06519	2672	tags=33%, list=23%, signal=26%	5214/2194/5213/5291/8503/10891/5527/5515/5862/3156/10000/8900/6009/5518/3667/1385/31/51719/55012/7249/8408/5290/51422/5521/5516/5528/6720/5571/81617/5208/9230/8660/51552/23417/1374	PFKP/FASN/PFKM/PIK3CB/PIK3R3/PPARGC1A/PPP2R5C/PPP2CA/RAB2A/HMGCR/AKT3/CCNA1/RHEB/PPP2R1A/IRS1/CREB1/ACACA/CAB39/PPP2R3C/TSC2/ULK1/PIK3CA/PRKAG2/PPP2R2B/PPP2CB/PPP2R5D/SREBF1/PRKAG1/CAB39L/PFKFB2/RAB11B/IRS2/RAB14/MLYCD/CPT1A

## Sheet: GAP43
Supplementary Table S5 |Gene Set Enrichment Analyses identification of GAP43-related signaling pathways
ID	Description	setSize	enrichmentScore	NES	pvalue	p.adjust	qvalues	rank	leading_edge	core_enrichment	gene_name
hsa05012	Parkinson disease	199	0.487469	2.06914	0.000140449	0.000140449	0.00430769	2351	tags=43%, list=20%, signal=35%	6571/7345/7384/6531/816/7054/5601/10381/7280/2774/7277/3831/4698/291/7416/5718/818/2778/203068/10383/4729/5714/6389/4719/23516/1537/6622/64837/1813/4706/3708/9377/10131/4705/5709/293/5702/27429/7317/10105/4723/5684/4696/5705/54205/4720/4704/5708/7386/4714/5602/7385/5682/801/7419/5694/292/4712/1345/5685/1327/5566/4722/1337/5695/5691/51079/5690/4697/1351/7332/4137/65018/27089/7295/1349/9927/3800/57…	SLC18A2/UCHL1/UQCRC1/SLC6A3/CAMK2B/TH/MAPK9/TUBB3/TUBB2A/GNAL/TUBA4A/KLC1/NDUFA5/SLC25A4/VDAC1/PSMD12/CAMK2G/GNAS/TUBB/TUBB4B/NDUFV2/PSMD8/SDHA/NDUFS1/SLC39A14/CYC1/SNCA/KLC2/DRD2/NDUFAB1/ITPR1/COX5A/TRAP1/NDUFA10/PSMD3/SLC25A6/PSMC3/HTRA2/UBA1/PPIF/NDUFV1/PSMA3/NDUFA3/PSMC5/CYCS/NDUFS2/NDUFA9/PSMD2/UQCRFS1/NDUFB8/MAPK10/UQCRC2/PSMA1/CALM1/VDAC3/PSMB6/SLC25A5/NDUFB6/COX6C/PSMA4/COX4I1/PRKACA/NDUF…
hsa05017	Spinocerebellar ataxia	130	0.545457	2.18843	0.00014817	0.00014817	0.00430769	2339	tags=45%, list=20%, signal=37%	5332/2911/2890/5601/3752/6712/8503/489/291/4976/7416/5718/10939/5291/5714/30849/488/3708/10000/5709/293/5702/10105/9821/8678/5684/5705/54205/7436/25814/5708/23130/9519/5602/5682/6511/7419/5694/292/6311/5685/5695/29982/5691/6261/5579/5690/2959/23152/8408/207/2475/23236/5707/5719/5710/23369/5700/5693	PLCB4/GRM1/GRIA1/MAPK9/KCND3/SPTBN2/PIK3R3/ATP2A3/SLC25A4/OPA1/VDAC1/PSMD12/AFG3L2/PIK3CB/PSMD8/PIK3R4/ATP2A2/ITPR1/AKT3/PSMD3/SLC25A6/PSMC3/PPIF/RB1CC1/BECN1/PSMA3/PSMC5/CYCS/VLDLR/ATXN10/PSMD2/ATG2A/TBPL1/MAPK10/PSMA1/SLC1A6/VDAC3/PSMB6/SLC25A5/ATXN2/PSMA4/PSMB7/NRBF2/PSMB3/RYR1/PRKCB/PSMB2/GTF2B/CIC/ULK1/AKT1/MTOR/PLCB1/PSMD1/PSMD13/PSMD4/PUM2/PSMC1/PSMB5
hsa04723	Retrograde endocannabinoid signaling	118	0.531782	2.10565	0.000149477	0.000149477	0.00430769	1984	tags=34%, list=17%, signal=28%	57084/5332/2911/2890/2554/2785/3763/2566/5601/1268/10681/4698/115/107/4729/2558/4719/4706/3708/4705/2775/4723/2782/4696/5594/2915/4720/3765/4704/5595/4714/5602/4712/5600/5566/4722/51079/5579/4697/109	SLC17A6/PLCB4/GRM1/GRIA1/GABRA1/GNG3/KCNJ6/GABRG2/MAPK9/CNR1/GNB5/NDUFA5/ADCY9/ADCY1/NDUFV2/GABRA5/NDUFS1/NDUFAB1/ITPR1/NDUFA10/GNAO1/NDUFV1/GNB1/NDUFA3/MAPK1/GRM5/NDUFS2/KCNJ9/NDUFA9/MAPK3/NDUFB8/MAPK10/NDUFB6/MAPK11/PRKACA/NDUFS3/NDUFA13/PRKCB/NDUFA4/ADCY3
hsa04728	Dopaminergic synapse	115	0.557701	2.1947	0.000150761	0.000150761	0.00430769	1207	tags=27%, list=10%, signal=24%	50632/5332/1644/6571/2890/2785/3763/6323/6531/816/7054/5601/2774/5530/10681/5532/818/5518/2778/408/5515/1813/55012/3708/10000/2775/2782/5527/3765/5526/55844	CALY/PLCB4/DDC/SLC18A2/GRIA1/GNG3/KCNJ6/SCN1A/SLC6A3/CAMK2B/TH/MAPK9/GNAL/PPP3CA/GNB5/PPP3CB/CAMK2G/PPP2R1A/GNAS/ARRB1/PPP2CA/DRD2/PPP2R3C/ITPR1/AKT3/GNAO1/GNB1/PPP2R5C/KCNJ9/PPP2R5B/PPP2R2D
hsa01200	Carbon metabolism	100	0.499751	1.92901	0.000153516	0.000153516	0.00430769	1510	tags=35%, list=13%, signal=31%	55753/2805/2026/5214/4190/2821/50/5213/10873/3098/5315/3419/8803/7167/6389/230/1738/5230/1431/2023/1737/3418/4191/3421/10993/226/5096/5631/5162/38/5226/5223/2806/39/3420	OGDHL/GOT1/ENO2/PFKP/MDH1/GPI/ACO2/PFKM/ME3/HK1/PKM/IDH3A/SUCLA2/TPI1/SDHA/ALDOC/DLD/PGK1/CS/ENO1/DLAT/IDH2/MDH2/IDH3G/SDS/ALDOA/PCCB/PRPS1/PDHB/ACAT1/PGD/PGAM1/GOT2/ACAT2/IDH3B
hsa04724	Glutamatergic synapse	94	0.551171	2.10456	0.000155159	0.000155159	0.00430769	1984	tags=33%, list=17%, signal=28%	57084/5332/2911/2890/2785/27165/2744/5530/10681/115/22941/5532/6505/107/2778/3708/2775/2782/9456/5594/2915/2898/5595/54407/6511/5566/81539/5579/2918/7220/109	SLC17A6/PLCB4/GRM1/GRIA1/GNG3/GLS2/GLS/PPP3CA/GNB5/ADCY9/SHANK2/PPP3CB/SLC1A1/ADCY1/GNAS/ITPR1/GNAO1/GNB1/HOMER1/MAPK1/GRM5/GRIK2/MAPK3/SLC38A2/SLC1A6/PRKACA/SLC38A1/PRKCB/GRM8/TRPC1/ADCY3
hsa00190	Oxidative phosphorylation	85	0.65203	2.44578	0.000157406	0.000157406	0.00430769	2485	tags=60%, list=21%, signal=48%	526/7384/534/523/51606/1353/4698/9114/5464/155066/4729/6389/4719/1537/527/535/4706/9377/4705/537/4723/9550/4696/54205/4720/4704/533/7386/528/479/529/4714/7385/4712/1345/1327/4722/1337/27068/51079/4697/1351/1352/27089/1349/4695/51382/4717/9167/4724/4702	ATP6V1B2/UQCRC1/ATP6V1G2/ATP6V1A/ATP6V1H/COX11/NDUFA5/ATP6V0D1/PPA1/ATP6V0E2/NDUFV2/SDHA/NDUFS1/CYC1/ATP6V0C/ATP6V0A1/NDUFAB1/COX5A/NDUFA10/ATP6AP1/NDUFV1/ATP6V1G1/NDUFA3/CYCS/NDUFS2/NDUFA9/ATP6V0B/UQCRFS1/ATP6V1C1/ATP12A/ATP6V1E1/NDUFB8/UQCRC2/NDUFB6/COX6C/COX4I1/NDUFS3/COX6A1/PPA2/NDUFA13/NDUFA4/COX8A/COX10/UQCRQ/COX7B/NDUFA2/ATP6V1D/NDUFC1/COX7A2L/NDUFS4/NDUFA8
hsa04727	GABAergic synapse	76	0.62258	2.29357	0.000160359	0.000160359	0.00430769	1016	tags=28%, list=9%, signal=25%	9568/57468/2571/2554/2785/2572/27165/3763/2744/2566/10681/2550/23710/10243/115/6529/107/2558/2775/6538/2782	GABBR2/SLC12A5/GAD1/GABRA1/GNG3/GAD2/GLS2/KCNJ6/GLS/GABRG2/GNB5/GABBR1/GABARAPL1/GPHN/ADCY9/SLC6A1/ADCY1/GABRA5/GNAO1/SLC6A11/GNB1
hsa04721	Synaptic vesicle cycle	64	0.723367	2.58308	0.000163666	0.000163666	0.00430769	1428	tags=52%, list=12%, signal=46%	57084/6857/1759/6616/6571/526/6812/6531/26052/534/5864/523/51606/1213/9114/6505/6529/1173/155066/6536/527/1212/535/1175/6844/9550/6538/8775/161/533/8218/528/529	SLC17A6/SYT1/DNM1/SNAP25/SLC18A2/ATP6V1B2/STXBP1/SLC6A3/DNM3/ATP6V1G2/RAB3A/ATP6V1A/ATP6V1H/CLTC/ATP6V0D1/SLC1A1/SLC6A1/AP2M1/ATP6V0E2/SLC6A9/ATP6V0C/CLTB/ATP6V0A1/AP2S1/VAMP2/ATP6V1G1/SLC6A11/NAPA/AP2A2/ATP6V0B/CLTCL1/ATP6V1C1/ATP6V1E1
hsa00020	Citrate cycle (TCA cycle)	30	0.711749	2.18466	0.000180278	0.000180278	0.00430769	1665	tags=53%, list=14%, signal=46%	55753/4190/50/47/3419/8803/6389/1738/1431/1737/3418/4191/3421/5162/3420/48	OGDHL/MDH1/ACO2/ACLY/IDH3A/SUCLA2/SDHA/DLD/CS/DLAT/IDH2/MDH2/IDH3G/PDHB/IDH3B/ACO1
hsa04061	Viral protein interaction with cytokine and cytokine receptor	86	-0.476715	-2.00102	0.000272926	0.000272926	0.00530158	3263	tags=48%, list=28%, signal=35%	3577/8793/6363/6357/2921/6346/6356/3559/6372/6351/1234/3572/4049/6352/8794/2833/6370/1230/6368/6373/51554/1232/1235/8743/8764/6366/1435/29949/6362/5197/3576/3569/7133/27178/6387/7132/3587/6347/8795/57007/7852	CXCR1/TNFRSF10D/CCL19/CCL13/CXCL3/CCL1/CCL11/IL2RA/CXCL6/CCL4/CCR5/IL6ST/LTA/CCL5/TNFRSF10C/CXCR3/CCL25/CCR1/CCL23/CXCL11/ACKR4/CCR3/CCR6/TNFSF10/TNFRSF14/CCL21/CSF1/IL19/CCL18/PF4V1/CXCL8/IL6/TNFRSF1B/IL37/CXCL12/TNFRSF1A/IL10RA/CCL2/TNFRSF10B/ACKR3/CXCR4
hsa04714	Thermogenesis	164	0.442144	1.82994	0.000288143	0.000288143	0.00530158	2139	tags=35%, list=18%, signal=29%	7384/1268/6604/1353/51412/4698/115/6597/107/10891/2778/51422/4729/6389/29078/4719/1537/5571/2182/4706/3845/9377/4705/6197/4723/4696/7249/4720/4704/7386/57104/4714/7385/23028/3265/4712/1345/6654/5600/23305/1327/5566/4722/1337/6009/51079/28958/4697/51103/10488/55744/1351/64223/109/1352/27089/2475/1349	UQCRC1/CNR1/SMARCD3/COX11/ACTL6B/NDUFA5/ADCY9/SMARCA4/ADCY1/PPARGC1A/GNAS/PRKAG2/NDUFV2/SDHA/NDUFAF4/NDUFS1/CYC1/PRKAG1/ACSL4/NDUFAB1/KRAS/COX5A/NDUFA10/RPS6KA3/NDUFV1/NDUFA3/TSC2/NDUFS2/NDUFA9/UQCRFS1/PNPLA2/NDUFB8/UQCRC2/KDM1A/HRAS/NDUFB6/COX6C/SOS1/MAPK11/ACSL6/COX4I1/PRKACA/NDUFS3/COX6A1/RHEB/NDUFA13/COA3/NDUFA4/NDUFAF1/CREB3/COA1/COX8A/MLST8/ADCY3/COX10/UQCRQ/MTOR/COX7B
hsa05415	Diabetic cardiomyopathy	159	0.479029	1.97469	0.000288434	0.000288434	0.00530158	2540	tags=45%, list=22%, signal=36%	5332/7384/816/5601/185/8503/5166/489/4698/291/7416/5590/818/5291/4729/6389/4719/1537/5164/4706/6262/488/10000/9377/4705/293/10105/4723/4696/5162/2673/4720/4704/183/7386/25874/5580/4714/5602/7385/7419/292/1509/4712/1345/5600/1327/4722/1337/4318/51079/5579/4697/1351/2597/27089/207/2475/5499/1349/2936/23236/4695/5160/4717/4688/2997/9167/4724/4702/5500/3667	PLCB4/UQCRC1/CAMK2B/MAPK9/AGTR1/PIK3R3/PDK4/ATP2A3/NDUFA5/SLC25A4/VDAC1/PRKCZ/CAMK2G/PIK3CB/NDUFV2/SDHA/NDUFS1/CYC1/PDK2/NDUFAB1/RYR2/ATP2A2/AKT3/COX5A/NDUFA10/SLC25A6/PPIF/NDUFV1/NDUFA3/PDHB/GFPT1/NDUFS2/NDUFA9/AGT/UQCRFS1/MPC2/PRKCD/NDUFB8/MAPK10/UQCRC2/VDAC3/SLC25A5/CTSD/NDUFB6/COX6C/MAPK11/COX4I1/NDUFS3/COX6A1/MMP9/NDUFA13/PRKCB/NDUFA4/COX8A/GAPDH/UQCRQ/AKT1/MTOR/PPP1CA/COX7B/GSR/PLCB1/NDUFA2…
hsa05230	Central carbon metabolism in cancer	66	0.540912	1.94561	0.000324412	0.000324412	0.00538716	1615	tags=38%, list=14%, signal=33%	5979/27165/2744/5214/5213/8503/3815/3098/3939/5315/5291/4916/3418/3845/10000/5604/5594/5162/9997/5223/5605/5595/3945/4914/3265	RET/GLS2/GLS/PFKP/PFKM/PIK3R3/KIT/HK1/LDHA/PKM/PIK3CB/NTRK3/IDH2/KRAS/AKT3/MAP2K1/MAPK1/PDHB/SCO2/PGAM1/MAP2K2/MAPK3/LDHB/NTRK1/HRAS
hsa04961	Endocrine and other factor-regulated calcium reabsorption	49	0.608038	2.06486	0.000338181	0.000338181	0.00538716	1707	tags=41%, list=14%, signal=35%	1759/5332/793/26052/491/1213/481/115/1173/2778/6543/476/1212/1175/8766/161/8218/493/483/5566	DNM1/PLCB4/CALB1/DNM3/ATP2B2/CLTC/ATP1B1/ADCY9/AP2M1/GNAS/SLC8A2/ATP1A1/CLTB/AP2S1/RAB11A/AP2A2/CLTCL1/ATP2B4/ATP1B3/PRKACA
hsa01230	Biosynthesis of amino acids	61	0.535334	1.89403	0.000492126	0.000492126	0.00693083	2136	tags=51%, list=18%, signal=42%	2805/2026/5214/440/50/5213/5315/3419/435/7167/230/5230/1431/2023/384/3418/3421/10993/226/445/5631/5223/2806/3420/48/27430/586/2597/6470/875/1373	GOT1/ENO2/PFKP/ASNS/ACO2/PFKM/PKM/IDH3A/ASL/TPI1/ALDOC/PGK1/CS/ENO1/ARG2/IDH2/IDH3G/SDS/ALDOA/ASS1/PRPS1/PGAM1/GOT2/IDH3B/ACO1/MAT2B/BCAT1/GAPDH/SHMT1/CBS/CPS1
hsa04742	Taste transduction	60	0.540632	1.9087	0.000493097	0.000493097	0.00693083	573	tags=12%, list=5%, signal=11%	9568/5332/2911/2554/6328/2550/2558	GABBR2/PLCB4/GRM1/GABRA1/SCN3A/GABBR1/GABRA5
hsa04730	Long-term depression	51	0.566462	1.93953	0.000672721	0.000672721	0.00856442	1867	tags=35%, list=16%, signal=30%	5332/2911/2890/10842/5518/10672/2778/5515/3845/3708/2775/5604/5594/5605/5595/3265/6261/5579	PLCB4/GRM1/GRIA1/PPP1R17/PPP2R1A/GNA13/GNAS/PPP2CA/KRAS/ITPR1/GNAO1/MAP2K1/MAPK1/MAP2K2/MAPK3/HRAS/RYR1/PRKCB
hsa05171	Coronavirus disease - COVID-19	200	-0.349815	-1.67449	0.000695169	0.000695169	0.00856442	2800	tags=39%, list=24%, signal=30%	7311/1839/2165/735/6133/6229/6868/2244/728/6123/6235/3454/5970/6141/6156/1675/2212/6176/4153/2266/5603/6164/6143/2353/6217/4940/3572/1636/6227/6135/4314/6167/6166/6774/10379/6218/6181/6146/6165/834/730/6233/4792/3445/6170/5648/6155/6152/3551/4142/5336/6223/51284/6159/3725/4938/5335/6168/6850/57506/1536/7098/9636/3440/6210/3576/3569/114548/4600/3439/6169/6157/6205/7132/6171/64135/6347/5295	UBA52/HBEGF/F13B/C9/RPL9/RPS24/ADAM17/FGB/C5AR1/RPL3L/RPS29/IFNAR1/RELA/RPL18/RPL30/CFD/FCGR2A/RPLP1/MBL2/FGG/MAPK13/RPL34/RPL19/FOS/RPS16/OAS3/IL6ST/ACE/RPS21/RPL11/MMP3/RPL37/RPL36AL/STAT3/IRF9/RPS17/RPLP2/RPL22/RPL35A/CASP1/C7/RPS27A/NFKBIA/IFNA8/RPL39/MASP1/RPL27/RPL24/IKBKB/MAS1/PLCG2/RPS19/TLR7/RPL29/JUN/OAS1/PLCG1/RPL37A/SYK/MAVS/CYBB/TLR3/ISG15/IFNA2/RPS15A/CXCL8/IL6/NLRP3/MX2/IFNA1/RPL38…
hsa05033	Nicotine addiction	31	0.650095	2.00904	0.000716846	0.000716846	0.00856442	573	tags=16%, list=5%, signal=15%	57084/2890/2554/2566/2558	SLC17A6/GRIA1/GABRA1/GABRG2/GABRA5
hsa00562	Inositol phosphate metabolism	65	0.519721	1.86257	0.00081367	0.00081367	0.00857321	2465	tags=43%, list=21%, signal=34%	5332/8867/22876/3631/5297/23396/4952/8395/5291/55361/9110/7167/22908/9896/27124/3612/9562/56623/23007/8776/3632/8396/8821/23236/5287/10423/64419/8898	PLCB4/SYNJ1/INPP5F/INPP4A/PI4KA/PIP5K1C/OCRL/PIP5K1B/PIK3CB/PI4K2A/MTMR4/TPI1/SACM1L/FIG4/INPP5J/IMPA1/MINPP1/INPP5E/PLCH1/MTMR1/INPP5A/PIP4K2B/INPP4B/PLCB1/PIK3C2B/CDIPT/MTMR14/MTMR2
hsa04720	Long-term potentiation	61	0.525575	1.8595	0.00082021	0.00082021	0.00857321	1707	tags=33%, list=14%, signal=28%	5332/2911/2890/816/5530/5532/818/107/3845/3708/5502/6197/5604/5594/2915/5605/5595/801/3265/5566	PLCB4/GRM1/GRIA1/CAMK2B/PPP3CA/PPP3CB/CAMK2G/ADCY1/KRAS/ITPR1/PPP1R1A/RPS6KA3/MAP2K1/MAPK1/GRM5/MAP2K2/MAPK3/CALM1/HRAS/PRKACA
hsa05031	Amphetamine addiction	57	0.531721	1.85851	0.000825219	0.000825219	0.00857321	505	tags=18%, list=4%, signal=17%	1644/6571/2890/6531/816/7054/5530/5532/818/2778	DDC/SLC18A2/GRIA1/SLC6A3/CAMK2B/TH/PPP3CA/PPP3CB/CAMK2G/GNAS
hsa00010	Glycolysis / Gluconeogenesis	58	0.536557	1.88298	0.000986842	0.000986842	0.00982514	1569	tags=36%, list=13%, signal=32%	2026/5214/2821/5213/3098/3939/5315/7167/230/1738/5230/2023/1737/669/226/5236/10327/5162/5223/3945/9562	ENO2/PFKP/GPI/PFKM/HK1/LDHA/PKM/TPI1/ALDOC/DLD/PGK1/ENO1/DLAT/BPGM/ALDOA/PGM1/AKR1A1/PDHB/PGAM1/LDHB/MINPP1
hsa00051	Fructose and mannose metabolism	28	0.630376	1.90504	0.00109071	0.00109071	0.0103745	1221	tags=36%, list=10%, signal=32%	5214/5213/3098/7167/230/226/4351/6652/231/5208	PFKP/PFKM/HK1/TPI1/ALDOC/ALDOA/MPI/SORD/AKR1B1/PFKFB2
hsa04911	Insulin secretion	74	0.48818	1.78786	0.00112885	0.00112885	0.0103745	801	tags=20%, list=7%, signal=19%	6616/5332/885/116/5864/816/27445/481/115/818/107/2778/476/11069/6262	SNAP25/PLCB4/CCK/ADCYAP1/RAB3A/CAMK2B/PCLO/ATP1B1/ADCY9/CAMK2G/ADCY1/GNAS/ATP1A1/RAPGEF4/RYR2
hsa04713	Circadian entrainment	83	0.478554	1.78626	0.00126924	0.00126924	0.011015	1984	tags=31%, list=17%, signal=26%	5332/2890/2785/3763/116/816/10681/115/8911/818/107/2778/6262/8913/3708/2775/2782/5594/3765/5595/801/5566/6261/5579/117/109	PLCB4/GRIA1/GNG3/KCNJ6/ADCYAP1/CAMK2B/GNB5/ADCY9/CACNA1I/CAMK2G/ADCY1/GNAS/RYR2/CACNA1G/ITPR1/GNAO1/GNB1/MAPK1/KCNJ9/MAPK3/CALM1/PRKACA/RYR1/PRKCB/ADCYAP1R1/ADCY3
hsa04260	Cardiac muscle contraction	70	0.498091	1.80937	0.00129074	0.00129074	0.011015	2237	tags=36%, list=19%, signal=29%	7384/784/10479/9254/489/481/55799/6543/476/1537/10368/6262/488/9377/7386/7385/483/1345/1327/1337/1351/27089/482/1349/444	UQCRC1/CACNB3/SLC9A6/CACNA2D2/ATP2A3/ATP1B1/CACNA2D3/SLC8A2/ATP1A1/CYC1/CACNG3/RYR2/ATP2A2/COX5A/UQCRFS1/UQCRC2/ATP1B3/COX6C/COX4I1/COX6A1/COX8A/UQCRQ/ATP1B2/COX7B/ASPH
hsa01210	2-Oxocarboxylic acid metabolism	13	0.751874	1.88783	0.00157048	0.00157048	0.0127725	1915	tags=77%, list=16%, signal=64%	2805/50/3419/1431/3418/3421/2806/3420/48/586	GOT1/ACO2/IDH3A/CS/IDH2/IDH3G/GOT2/IDH3B/ACO1/BCAT1
hsa05164	Influenza A	156	-0.338371	-1.56448	0.00160359	0.00160359	0.0127725	2092	tags=28%, list=18%, signal=23%	4940/1021/4261/8106/6352/10379/3841/841/896/834/4792/3445/11100/578/3551/8743/317/3459/51284/4938/57506/1965/3117/7098/3440/3113/355/3576/3569/83447/114548/3119/4600/3439/7132/64135/5611/6347/8795/91543/3665/3337/5295	OAS3/CDK6/CIITA/PABPN1/CCL5/IRF9/KPNA5/CASP8/CCND3/CASP1/NFKBIA/IFNA8/HNRNPUL1/BAK1/IKBKB/TNFSF10/APAF1/IFNGR1/TLR7/OAS1/MAVS/EIF2S1/HLA-DQA1/TLR3/IFNA2/HLA-DPA1/FAS/CXCL8/IL6/SLC25A31/NLRP3/HLA-DQB1/MX2/IFNA1/TNFRSF1A/IFIH1/DNAJC3/CCL2/TNFRSF10B/RSAD2/IRF7/DNAJB1/PIK3R1
hsa04922	Glucagon signaling pathway	88	0.468861	1.76965	0.00172576	0.00172576	0.0133021	1707	tags=28%, list=14%, signal=24%	5332/5214/816/5530/5213/3939/31/5532/818/5315/10891/2778/51422/5571/3708/10000/5837/5257/5162/5223/3945/801/5834/5260/5566	PLCB4/PFKP/CAMK2B/PPP3CA/PFKM/LDHA/ACACA/PPP3CB/CAMK2G/PKM/PPARGC1A/GNAS/PRKAG2/PRKAG1/ITPR1/AKT3/PYGM/PHKB/PDHB/PGAM1/LDHB/CALM1/PYGB/PHKG1/PRKACA
hsa04929	GnRH secretion	59	0.503603	1.77156	0.00181548	0.00181548	0.0135564	1415	tags=29%, list=12%, signal=25%	9568/5332/3763/8503/2550/8911/5291/408/3845/8913/3708/10000/5604/5594/3765/5605/5595	GABBR2/PLCB4/KCNJ6/PIK3R3/GABBR1/CACNA1I/PIK3CB/ARRB1/KRAS/CACNA1G/ITPR1/AKT3/MAP2K1/MAPK1/KCNJ9/MAP2K2/MAPK3
hsa04261	Adrenergic signaling in cardiomyocytes	129	0.425603	1.70577	0.00192707	0.00192707	0.0139536	2273	tags=35%, list=19%, signal=28%	5332/491/816/784/185/9254/489/481/115/55799/818/107/5518/2778/6543/476/5515/11069/10368/55012/6262/488/10000/5502/5527/5594/5526/55844/183/5595/493/6324/801/483/5600/5566/154/10488/109/482/207/5499/23236/490/5528	PLCB4/ATP2B2/CAMK2B/CACNB3/AGTR1/CACNA2D2/ATP2A3/ATP1B1/ADCY9/CACNA2D3/CAMK2G/ADCY1/PPP2R1A/GNAS/SLC8A2/ATP1A1/PPP2CA/RAPGEF4/CACNG3/PPP2R3C/RYR2/ATP2A2/AKT3/PPP1R1A/PPP2R5C/MAPK1/PPP2R5B/PPP2R2D/AGT/MAPK3/ATP2B4/SCN1B/CALM1/ATP1B3/MAPK11/PRKACA/ADRB2/CREB3/ADCY3/ATP1B2/AKT1/PPP1CA/PLCB1/ATP2B1/PPP2R5D
hsa00250	Alanine, aspartate and glutamate metabolism	28	0.612672	1.85154	0.00218142	0.00218142	0.0153307	1364	tags=43%, list=12%, signal=38%	2571/2805/2572/27165/2744/440/435/7915/56954/445/2673/2806	GAD1/GOT1/GAD2/GLS2/GLS/ASNS/ASL/ALDH5A1/NIT2/ASS1/GFPT1/GOT2
hsa05208	Chemical carcinogenesis - reactive oxygen species	171	0.382005	1.59046	0.00242961	0.00242961	0.0165871	2139	tags=37%, list=18%, signal=31%	7384/5601/2947/8503/4698/291/7416/6416/5291/4729/6389/4719/1537/2941/4706/3845/10000/9377/4705/293/10105/10327/4723/5604/2053/4696/1147/5594/4720/4704/4259/7386/5605/5580/52/5595/4714/5602/7385/2953/7419/292/2052/3265/4712/1571/1345/6654/5600/1327/4722/1337/9446/2944/51079/4697/1645/1351/9020/27089/207/2952/1349	UQCRC1/MAPK9/GSTM3/PIK3R3/NDUFA5/SLC25A4/VDAC1/MAP2K4/PIK3CB/NDUFV2/SDHA/NDUFS1/CYC1/GSTA4/NDUFAB1/KRAS/AKT3/COX5A/NDUFA10/SLC25A6/PPIF/AKR1A1/NDUFV1/MAP2K1/EPHX2/NDUFA3/CHUK/MAPK1/NDUFS2/NDUFA9/MGST3/UQCRFS1/MAP2K2/PRKCD/ACP1/MAPK3/NDUFB8/MAPK10/UQCRC2/GSTT2/VDAC3/SLC25A5/EPHX1/HRAS/NDUFB6/CYP2E1/COX6C/SOS1/MAPK11/COX4I1/NDUFS3/COX6A1/GSTO1/GSTM1/NDUFA13/NDUFA4/AKR1C1/COX8A/MAP3K14/UQCRQ/AKT1/GS…
hsa05030	Cocaine addiction	41	0.548538	1.80021	0.00275862	0.00275862	0.0183101	698	tags=20%, list=6%, signal=18%	1644/6571/8851/1020/6531/7054/2778/1813	DDC/SLC18A2/CDK5R1/CDK5/SLC6A3/TH/GNAS/DRD2
hsa05032	Morphine addiction	76	0.46881	1.72709	0.00304682	0.00304682	0.0196765	579	tags=17%, list=5%, signal=16%	9568/2554/2785/3763/5141/2566/10681/2550/115/107/2778/2558/408	GABBR2/GABRA1/GNG3/KCNJ6/PDE4A/GABRG2/GNB5/GABBR1/ADCY9/ADCY1/GNAS/GABRA5/ARRB1
hsa04070	Phosphatidylinositol signaling system	83	0.449062	1.67618	0.00396637	0.00396637	0.0239685	2465	tags=40%, list=21%, signal=32%	5332/8867/22876/3631/5297/23396/8503/4952/8395/23262/5291/55361/9110/3708/22908/8760/801/3612/9677/1608/5579/56623/8776/3632/8396/9807/8821/23236/5287/10423/51447/64419/8898	PLCB4/SYNJ1/INPP5F/INPP4A/PI4KA/PIP5K1C/PIK3R3/OCRL/PIP5K1B/PPIP5K2/PIK3CB/PI4K2A/MTMR4/ITPR1/SACM1L/CDS2/CALM1/IMPA1/PPIP5K1/DGKG/PRKCB/INPP5E/MTMR1/INPP5A/PIP4K2B/IP6K1/INPP4B/PLCB1/PIK3C2B/CDIPT/IP6K2/MTMR14/MTMR2
hsa00220	Arginine biosynthesis	17	0.688031	1.85433	0.00400763	0.00400763	0.0239685	2770	tags=71%, list=24%, signal=54%	2805/27165/2744/435/384/445/2806/2747/1373/2875/2746/2752	GOT1/GLS2/GLS/ASL/ARG2/ASS1/GOT2/GLUD2/CPS1/GPT/GLUD1/GLUL
hsa04114	Oocyte meiosis	97	0.430895	1.65375	0.00401235	0.00401235	0.0239685	2273	tags=36%, list=19%, signal=29%	7533/816/5530/115/5532/818/107/5518/5515/3708/6197/25847/5604/5527/5594/7529/996/22849/7534/5526/8379/891/5595/801/9232/5600/5566/8454/109/991/898/5499/9985/8945/5528	YWHAH/CAMK2B/PPP3CA/ADCY9/PPP3CB/CAMK2G/ADCY1/PPP2R1A/PPP2CA/ITPR1/RPS6KA3/ANAPC13/MAP2K1/PPP2R5C/MAPK1/YWHAB/CDC27/CPEB3/YWHAZ/PPP2R5B/MAD1L1/CCNB1/MAPK3/CALM1/PTTG1/MAPK11/PRKACA/CUL1/ADCY3/CDC20/CCNE1/PPP1CA/REC8/BTRC/PPP2R5D
hsa05150	Staphylococcus aureus infection	71	-0.411112	-1.66548	0.0047356	0.0047356	0.026637	4525	tags=58%, list=38%, signal=36%	3689/3882/3112/10747/3883/2204/727/713/3884/629/8688/3426/3111/5340/25984/3859/3683/2209/3684/728/3868/1675/2212/2358/4153/2266/3858/3880/9103/1671/5648/3866/54474/3117/3113/6404/5724/1828/3119/2213/3075	ITGB2/KRT32/HLA-DOB/MASP2/KRT33A/FCAR/C5/C1QB/KRT33B/CFB/KRT37/CFI/HLA-DOA/PLG/KRT23/KRT12/ITGAL/FCGR1A/ITGAM/C5AR1/KRT16/CFD/FCGR2A/FPR2/MBL2/FGG/KRT10/KRT19/FCGR2C/DEFA6/MASP1/KRT15/KRT20/HLA-DQA1/HLA-DPA1/SELPLG/PTAFR/DSG1/HLA-DQB1/FCGR2B/CFH
hsa03050	Proteasome	41	0.532253	1.74677	0.00482759	0.00482759	0.026637	3289	tags=71%, list=28%, signal=51%	5718/5714/5709/5702/10197/5684/5705/5708/5682/5694/5685/5695/5691/5690/5707/5719/5710/5700/5693/5706/9861/11047/5715/5713/5717/5701/10213/5689/51371	PSMD12/PSMD8/PSMD3/PSMC3/PSME3/PSMA3/PSMC5/PSMD2/PSMA1/PSMB6/PSMA4/PSMB7/PSMB3/PSMB2/PSMD1/PSMD13/PSMD4/PSMC1/PSMB5/PSMC6/PSMD6/ADRM1/PSMD9/PSMD7/PSMD11/PSMC2/PSMD14/PSMB1/POMP
hsa04950	Maturity onset diabetes of the young	22	-0.566388	-1.74181	0.00498159	0.00498159	0.026637	4350	tags=77%, list=37%, signal=49%	4760/5313/6927/3280/6514/3175/3375/3110/3651/4825/6928/50674/3174/2494/4821/2645/5080	NEUROD1/PKLR/HNF1A/HES1/SLC2A2/ONECUT1/IAPP/MNX1/PDX1/NKX6-1/HNF1B/NEUROG3/HNF4G/NR5A2/NKX2-2/GCK/PAX6
hsa00650	Butanoate metabolism	22	0.623049	1.78581	0.00501393	0.00501393	0.026637	1453	tags=36%, list=12%, signal=32%	2571/2572/3157/7915/65985/38/5019/39	GAD1/GAD2/HMGCS1/ALDH5A1/AACS/ACAT1/OXCT1/ACAT2
hsa04962	Vasopressin-regulated water reabsorption	39	0.533017	1.73449	0.00501643	0.00501643	0.026637	1984	tags=46%, list=17%, signal=39%	1780/398/115/2778/51164/1778/10540/51143/6844/8766/1639/6810/5566/9230/361/5868/10488/109	DYNC1I1/ARHGDIG/ADCY9/GNAS/DCTN4/DYNC1H1/DCTN2/DYNC1LI1/VAMP2/RAB11A/DCTN1/STX4/PRKACA/RAB11B/AQP4/RAB5A/CREB3/ADCY3
hsa04725	Cholinergic synapse	96	0.424288	1.62628	0.00586963	0.00586963	0.0302382	1091	tags=20%, list=9%, signal=18%	5332/3785/43/2785/3763/816/8503/10681/115/818/5291/107/3845/3708/10000/2775/5604/2782/5594	PLCB4/KCNQ2/ACHE/GNG3/KCNJ6/CAMK2B/PIK3R3/GNB5/ADCY9/CAMK2G/PIK3CB/ADCY1/KRAS/ITPR1/AKT3/GNAO1/MAP2K1/GNB1/MAPK1
hsa05034	Alcoholism	86	0.436288	1.63828	0.00599558	0.00599558	0.0302382	1707	tags=27%, list=14%, signal=23%	1644/6571/2785/6531/7054/10681/2778/1813/3845/2775/2030/5604/2782/10014/5594/4915/5595/627/10013/801/3265/6654/5566	DDC/SLC18A2/GNG3/SLC6A3/TH/GNB5/GNAS/DRD2/KRAS/GNAO1/SLC29A1/MAP2K1/GNB1/HDAC5/MAPK1/NTRK2/MAPK3/BDNF/HDAC6/CALM1/HRAS/SOS1/PRKACA
hsa00620	Pyruvate metabolism	40	0.526697	1.71944	0.00607428	0.00607428	0.0302382	1453	tags=35%, list=12%, signal=31%	4190/10873/3939/31/5315/1738/1737/4191/10327/5162/2739/38/3945/39	MDH1/ME3/LDHA/ACACA/PKM/DLD/DLAT/MDH2/AKR1A1/PDHB/GLO1/ACAT1/LDHB/ACAT2
hsa04726	Serotonergic synapse	95	0.419948	1.60594	0.00666563	0.00666563	0.0325048	1233	tags=18%, list=10%, signal=16%	5332/1644/3358/6571/2785/3763/3751/10681/2778/3845/3708/2775/5604/2782/5594/3765/240	PLCB4/DDC/HTR2C/SLC18A2/GNG3/KCNJ6/KCND2/GNB5/GNAS/KRAS/ITPR1/GNAO1/MAP2K1/GNB1/MAPK1/KCNJ9/ALOX5
hsa05202	Transcriptional misregulation in cancer	159	-0.31024	-1.43579	0.00684485	0.00684485	0.0327112	2432	tags=35%, list=21%, signal=28%	1991/581/2209/860/6256/5966/3684/2078/4353/5970/6258/8864/1051/4291/4314/2005/3207/6667/2138/6760/466/5327/30012/2119/7704/1671/329/1050/4149/1031/6756/3206/578/4613/4208/330/5077/8148/2321/862/5079/3065/2530/4193/6929/1026/904/3576/890/3569/7490/4299/4286/472/4094/7403	ELANE/BAX/FCGR1A/RUNX2/RXRA/REL/ITGAM/ERG/MPO/RELA/RXRG/PER2/CEBPB/MLF1/MMP3/ELK4/HOXA11/SP1/EYA1/SS18/ATF1/PLAT/TLX3/ETV5/ZBTB16/DEFA6/BIRC2/CEBPA/MAX/CDKN2C/SSX1/HOXA10/BAK1/MYCN/MEF2C/BIRC3/PAX3/TAF15/FLT1/RUNX1T1/PAX5/HDAC1/FUT8/MDM2/TCF3/CDKN1A/CCNT1/CXCL8/CCNA2/IL6/WT1/AFF1/MITF/ATM/MAF/KDM6A
hsa05162	Measles	128	-0.323898	-1.4516	0.0070704	0.0070704	0.0328068	2659	tags=30%, list=23%, signal=24%	3559/917/2932/3454/9134/5970/868/2353/4940/1021/595/6774/10379/940/841/896/4792/3445/578/915/3551/317/51284/3725/4938/57506/1965/3440/355/596/3569/4600/3439/3310/64135/2213/3305/3665/5295	IL2RA/CD3G/GSK3B/IFNAR1/CCNE2/RELA/CBLB/FOS/OAS3/CDK6/CCND1/STAT3/IRF9/CD28/CASP8/CCND3/NFKBIA/IFNA8/BAK1/CD3D/IKBKB/APAF1/TLR7/JUN/OAS1/MAVS/EIF2S1/IFNA2/FAS/BCL2/IL6/MX2/IFNA1/HSPA6/IFIH1/FCGR2B/HSPA1L/IRF7/PIK3R1
hsa04925	Aldosterone synthesis and secretion	83	0.435167	1.62431	0.00713946	0.00713946	0.0328068	2260	tags=36%, list=19%, signal=29%	5332/491/816/185/481/115/8911/818/107/2778/476/3777/8913/3708/57172/183/493/801/483/8536/5566/4929/5579/3949/10488/109/482/23236/5138/490	PLCB4/ATP2B2/CAMK2B/AGTR1/ATP1B1/ADCY9/CACNA1I/CAMK2G/ADCY1/GNAS/ATP1A1/KCNK3/CACNA1G/ITPR1/CAMK1G/AGT/ATP2B4/CALM1/ATP1B3/CAMK1/PRKACA/NR4A2/PRKCB/LDLR/CREB3/ADCY3/ATP1B2/PLCB1/PDE2A/ATP2B1
hsa04540	Gap junction	80	0.436794	1.6244	0.00840203	0.00840203	0.0378801	2000	tags=31%, list=17%, signal=26%	5332/2911/3358/10381/7280/7277/115/107/2778/203068/10383/1813/3845/3708/5604/5594/2915/5605/5595/3265/6654/5566/5579/109/3356	PLCB4/GRM1/HTR2C/TUBB3/TUBB2A/TUBA4A/ADCY9/ADCY1/GNAS/TUBB/TUBB4B/DRD2/KRAS/ITPR1/MAP2K1/MAPK1/GRM5/MAP2K2/MAPK3/HRAS/SOS1/PRKACA/PRKCB/ADCY3/HTR2A
hsa04670	Leukocyte transendothelial migration	99	-0.346763	-1.4897	0.00915856	0.00915856	0.0405262	2854	tags=39%, list=24%, signal=30%	9076/3688/5906/5829/2773/100506658/3684/394/4689/26285/5603/5908/1535/9071/81/1499/653361/7408/29895/4636/1365/3676/2770/4313/5336/23562/50848/10411/5335/1003/1536/7412/399/6093/6387/58494/5295/7852/24146	CLDN1/ITGB1/RAP1A/PXN/GNAI3/OCLN/ITGAM/ARHGAP5/NCF4/CLDN17/MAPK13/RAP1B/CYBA/CLDN10/ACTN4/CTNNB1/NCF1/VASP/MYLPF/MYL5/CLDN3/ITGA4/GNAI1/MMP2/PLCG2/CLDN14/F11R/RAPGEF3/PLCG1/CDH5/CYBB/VCAM1/RHOH/ROCK1/CXCL12/JAM2/PIK3R1/CXCR4/CLDN15
hsa04979	Cholesterol metabolism	45	-0.434132	-1.59349	0.00966184	0.00966184	0.0412603	3814	tags=53%, list=32%, signal=36%	948/345/10577/51129/4023/10948/8647/27141/3931/64240/9388/4864/3988/338/6272/27329/6646/341/19/1581/1593/26119/29116/4036	CD36/APOC3/NPC2/ANGPTL4/LPL/STARD3/ABCB11/CIDEB/LCAT/ABCG5/LIPG/NPC1/LIPA/APOB/SORT1/ANGPTL3/SOAT1/APOC1/ABCA1/CYP7A1/CYP27A1/LDLRAP1/MYLIP/LRP2
hsa04672	Intestinal immune network for IgA production	40	-0.450714	-1.61205	0.00966981	0.00966981	0.0412603	1759	tags=32%, list=15%, signal=28%	57379/6370/959/940/3676/608/3117/3113/3569/3600/3119/6387/7852	AICDA/CCL25/CD40LG/CD28/ITGA4/TNFRSF17/HLA-DQA1/HLA-DPA1/IL6/IL15/HLA-DQB1/CXCL12/CXCR4
hsa01250	Biosynthesis of nucleotide sugars	30	0.550346	1.68924	0.0102758	0.0102758	0.042661	1185	tags=33%, list=10%, signal=30%	2821/3098/55907/2592/54187/6675/7360/5236/4351/2673	GPI/HK1/CMAS/GALT/NANS/UAP1/UGP2/PGM1/MPI/GFPT1
hsa04142	Lysosome	114	0.390583	1.53645	0.0103931	0.0103931	0.042661	2282	tags=33%, list=19%, signal=27%	8120/23312/51606/1213/9583/9114/23335/527/23457/138050/1212/535/5476/51172/3423/537/4758/950/53/6448/8943/10947/533/8218/4669/57192/164/1509/4668/8906/162/3073/2517/1519/1657/6609/8372/23659	AP3B2/DMXL2/ATP6V1H/CLTC/ENTPD4/ATP6V0D1/WDR7/ATP6V0C/ABCB9/HGSNAT/CLTB/ATP6V0A1/CTSA/NAGPA/IDS/ATP6AP1/NEU1/SCARB2/ACP2/SGSH/AP3D1/AP3M2/ATP6V0B/CLTCL1/NAGLU/MCOLN1/AP1G1/CTSD/NAGA/AP1G2/AP1B1/HEXA/FUCA1/CTSO/DMXL1/SMPD1/HYAL3/PLA2G15
hsa04144	Endocytosis	199	0.339684	1.44184	0.0105337	0.0105337	0.042661	2268	tags=27%, list=19%, signal=22%	273/1759/10193/6456/440073/26052/30845/23396/56904/8395/1213/5590/10097/10552/26056/1173/8723/9922/9829/408/8027/60682/1212/9525/1175/8766/57180/55040/161/23327/8218/3579/377/11311/3265/55680/10564/9230/830/81873/3949/84364/5868/9101/10015/51160/6457/57403/2869/3800/57132/6643/27243	AMPH/DNM1/RNF41/SH3GL2/IQSEC3/DNM3/EHD3/PIP5K1C/SH3GLB2/PIP5K1B/CLTC/PRKCZ/ACTR2/ARPC1A/RAB11FIP5/AP2M1/SNX4/IQSEC1/DNAJC6/ARRB1/STAM/SMAP1/CLTB/VPS4B/AP2S1/RAB11A/ACTR3B/EPN3/AP2A2/NEDD4L/CLTCL1/CXCR2/ARF3/VPS45/HRAS/RUFY2/ARFGEF2/RAB11B/CAPZA2/ARPC5L/LDLR/ARFGAP2/RAB5A/USP8/PDCD6IP/VPS28/SH3GL3/RAB22A/GRK5/KIF5C/CHMP1B/SNX2/CHMP2A
hsa04064	NF-kappa B signaling pathway	93	-0.35003	-1.48811	0.0121366	0.0121366	0.0483335	2566	tags=31%, list=22%, signal=25%	29775/6351/3929/51588/5970/4049/8600/8792/959/79092/329/55367/4792/3551/5336/330/6366/3554/5335/6850/596/3576/7412/6387/7132/23643/8915/472/5743	CARD10/CCL4/LBP/PIAS4/RELA/LTA/TNFSF11/TNFRSF11A/CD40LG/CARD14/BIRC2/PIDD1/NFKBIA/IKBKB/PLCG2/BIRC3/CCL21/IL1R1/PLCG1/SYK/BCL2/CXCL8/VCAM1/CXCL12/TNFRSF1A/LY96/BCL10/ATM/PTGS2
hsa05110	Vibrio cholerae infection	42	0.49133	1.61988	0.0132462	0.0132462	0.0511215	1428	tags=38%, list=12%, signal=34%	526/534/523/51606/115/9114/2778/155066/55176/527/535/537/9550/533/528/529	ATP6V1B2/ATP6V1G2/ATP6V1A/ATP6V1H/ADCY9/ATP6V0D1/GNAS/ATP6V0E2/SEC61A2/ATP6V0C/ATP6V0A1/ATP6AP1/ATP6V1G1/ATP6V0B/ATP6V1C1/ATP6V1E1
hsa00030	Pentose phosphate pathway	25	0.570848	1.68613	0.0132646	0.0132646	0.0511215	1300	tags=32%, list=11%, signal=29%	5214/2821/5213/230/226/5236/5631/5226	PFKP/GPI/PFKM/ALDOC/ALDOA/PGM1/PRPS1/PGD
hsa05340	Primary immunodeficiency	33	-0.472596	-1.60695	0.0139684	0.0139684	0.0529796	3783	tags=61%, list=32%, signal=41%	100/5897/958/925/29851/3575/5788/3543/6890/57379/4261/973/959/64421/326/930/915/5896/7374/5994	ADA/RAG2/CD40/CD8A/ICOS/IL7R/PTPRC/IGLL1/TAP1/AICDA/CIITA/CD79A/CD40LG/DCLRE1C/AIRE/CD19/CD3D/RAG1/UNG/RFXAP
hsa01240	Biosynthesis of cofactors	105	0.388282	1.50801	0.0150169	0.0150169	0.0560662	2411	tags=33%, list=20%, signal=27%	23057/55312/4830/8566/10243/211/5805/1738/7360/7390/2643/10327/4351/51805/80025/9054/51727/5498/3145/790/2235/4337/27430/2937/1503/586/51109/79646/1352/6470/8836/27010/7389/2356/2730	NMNAT2/RFK/NME1/PDXK/GPHN/ALAS1/PTS/DLD/UGP2/UROS/GCH1/AKR1A1/MPI/COQ3/PANK2/NFS1/CMPK1/PPOX/HMBS/CAD/FECH/MOCS1/MAT2B/GSS/CTPS1/BCAT1/RDH11/PANK3/COX10/SHMT1/GGH/TPK1/UROD/FPGS/GCLM
hsa04921	Oxytocin signaling pathway	126	0.369876	1.47868	0.0154028	0.0154028	0.0566226	2248	tags=31%, list=19%, signal=25%	5332/3763/816/784/5530/9254/115/55799/5532/818/107/2778/9475/51422/10368/5571/6262/3845/3708/2775/5604/5594/57172/3765/5605/5595/140465/801/3265/8536/5566/6261/5579/109/7226/5499/952/23236/5021	PLCB4/KCNJ6/CAMK2B/CACNB3/PPP3CA/CACNA2D2/ADCY9/CACNA2D3/PPP3CB/CAMK2G/ADCY1/GNAS/ROCK2/PRKAG2/CACNG3/PRKAG1/RYR2/KRAS/ITPR1/GNAO1/MAP2K1/MAPK1/CAMK1G/KCNJ9/MAP2K2/MAPK3/MYL6B/CALM1/HRAS/CAMK1/PRKACA/RYR1/PRKCB/ADCY3/TRPM2/PPP1CA/CD38/PLCB1/OXTR
hsa04964	Proximal tubule bicarbonate reclamation	21	0.590424	1.66932	0.0161079	0.0161079	0.0583172	597	tags=24%, list=5%, signal=23%	27165/2744/4190/481/476	GLS2/GLS/MDH1/ATP1B1/ATP1A1
hsa00900	Terpenoid backbone biosynthesis	19	0.601803	1.66531	0.0169747	0.0169747	0.0605383	1876	tags=47%, list=16%, signal=40%	3157/3422/51449/23463/3156/38/39/79947/2224	HMGCS1/IDI1/PCYOX1/ICMT/HMGCR/ACAT1/ACAT2/DHDDS/FDPS
hsa04024	cAMP signaling pathway	189	0.333766	1.40806	0.0175858	0.0175858	0.0614661	834	tags=14%, list=7%, signal=13%	9568/6750/2890/5141/491/116/7432/816/5601/8503/2550/489/10451/481/115/818/5291/107/2778/9475/476/11069/1813/6262/488/10000	GABBR2/SST/GRIA1/PDE4A/ATP2B2/ADCYAP1/VIP/CAMK2B/MAPK9/PIK3R3/GABBR1/ATP2A3/VAV3/ATP1B1/ADCY9/CAMK2G/PIK3CB/ADCY1/GNAS/ROCK2/ATP1A1/RAPGEF4/DRD2/RYR2/ATP2A2/AKT3
hsa04966	Collecting duct acid secretion	22	0.576228	1.65161	0.0178273	0.0178273	0.0614661	1428	tags=45%, list=12%, signal=40%	526/534/523/9114/155066/527/535/9550/528/529	ATP6V1B2/ATP6V1G2/ATP6V1A/ATP6V0D1/ATP6V0E2/ATP6V0C/ATP6V0A1/ATP6V1G1/ATP6V1C1/ATP6V1E1
hsa05321	Inflammatory bowel disease	59	-0.388379	-1.51167	0.0180066	0.0180066	0.0614661	1865	tags=27%, list=16%, signal=23%	4772/7042/6774/4088/3459/51561/3725/3595/3605/64127/3117/3113/3569/3119/7100/4094	NFATC1/TGFB2/STAT3/SMAD3/IFNGR1/IL23A/JUN/IL12RB2/IL17A/NOD2/HLA-DQA1/HLA-DPA1/IL6/HLA-DQB1/TLR5/MAF
hsa01232	Nucleotide metabolism	58	0.443701	1.55711	0.0189145	0.0189145	0.0636558	1912	tags=28%, list=16%, signal=23%	3251/956/4830/9583/51292/8623/271/132/955/1635/51727/3614/79077/3615/54963/1503	HPRT1/ENTPD3/NME1/ENTPD4/GMPR2/ASMTL/AMPD2/ADK/ENTPD6/DCTD/CMPK1/IMPDH1/DCTPP1/IMPDH2/UCKL1/CTPS1
hsa00270	Cysteine and methionine metabolism	41	0.483678	1.58735	0.0201724	0.0201724	0.0669465	2432	tags=46%, list=21%, signal=37%	2805/4190/3939/4191/10993/6611/6723/2806/3945/1036/191/27430/2937/586/875/7263/1786/2730/58478	GOT1/MDH1/LDHA/MDH2/SDS/SMS/SRM/GOT2/LDHB/CDO1/AHCY/MAT2B/GSS/BCAT1/CBS/TST/DNMT1/GCLM/ENOPH1
hsa04072	Phospholipase D signaling pathway	131	0.359275	1.44352	0.020553	0.020553	0.0672752	2194	tags=29%, list=19%, signal=24%	1759/5332/2911/26052/23396/185/8503/3815/8395/115/5291/107/10672/2778/11069/5899/3845/10000/5604/5594/2915/7249/183/3579/5605/5595/1608/3265/56848/6654/6009/2918/10554/109/207/2475/23236/2185	DNM1/PLCB4/GRM1/DNM3/PIP5K1C/AGTR1/PIK3R3/KIT/PIP5K1B/ADCY9/PIK3CB/ADCY1/GNA13/GNAS/RAPGEF4/RALB/KRAS/AKT3/MAP2K1/MAPK1/GRM5/TSC2/AGT/CXCR2/MAP2K2/MAPK3/DGKG/HRAS/SPHK2/SOS1/RHEB/GRM8/AGPAT1/ADCY3/AKT1/MTOR/PLCB1/PTK2B
hsa04940	Type I diabetes mellitus	39	0.473957	1.5423	0.0292337	0.0292337	0.0943961	255	tags=13%, list=2%, signal=13%	2571/2572/5798/5799/3126	GAD1/GAD2/PTPRN/PTPRN2/HLA-DRB4
hsa04912	GnRH signaling pathway	80	0.391954	1.45765	0.0328155	0.0328155	0.103835	1707	tags=26%, list=14%, signal=23%	5332/816/5601/115/6416/818/107/2778/3845/3708/5604/5594/5605/5580/5595/5602/801/3265/6654/5600/5566	PLCB4/CAMK2B/MAPK9/ADCY9/MAP2K4/CAMK2G/ADCY1/GNAS/KRAS/ITPR1/MAP2K1/MAPK1/MAP2K2/PRKCD/MAPK3/MAPK10/CALM1/HRAS/SOS1/MAPK11/PRKACA
hsa04392	Hippo signaling pathway - multiple species	21	-0.505857	-1.53609	0.0330259	0.0330259	0.103835	1514	tags=71%, list=13%, signal=62%	9770/11186/8994/55233/9113/79981/8642/79633/54798/10413/1454/6788/7005/7004/25937	RASSF2/RASSF1/LIMD1/MOB1A/LATS1/FRMD1/DCHS1/FAT4/DCHS2/YAP1/CSNK1E/STK3/TEAD3/TEAD4/WWTR1
hsa00520	Amino sugar and nucleotide sugar metabolism	40	0.467793	1.52715	0.034016	0.034016	0.104795	1394	tags=30%, list=12%, signal=27%	2821/3098/55907/2592/54187/6675/51706/7360/5236/4351/2673/51167	GPI/HK1/CMAS/GALT/NANS/UAP1/CYB5R1/UGP2/PGM1/MPI/GFPT1/CYB5R4
hsa04371	Apelin signaling pathway	117	0.356514	1.40892	0.0342086	0.0342086	0.104795	2187	tags=29%, list=19%, signal=24%	5332/2785/185/10681/115/107/10891/10672/51422/6543/5571/30849/6262/3845/3708/10000/5604/2782/8678/10014/5594/5605/5595/81631/801/3265/56848/5566/6261/4854/109/207/2475/23236	PLCB4/GNG3/AGTR1/GNB5/ADCY9/ADCY1/PPARGC1A/GNA13/PRKAG2/SLC8A2/PRKAG1/PIK3R4/RYR2/KRAS/ITPR1/AKT3/MAP2K1/GNB1/BECN1/HDAC5/MAPK1/MAP2K2/MAPK3/MAP1LC3B/CALM1/HRAS/SPHK2/PRKACA/RYR1/NOTCH3/ADCY3/AKT1/MTOR/PLCB1
hsa04927	Cortisol synthesis and secretion	56	0.425161	1.47964	0.0351051	0.0351051	0.106181	815	tags=18%, list=7%, signal=17%	5332/185/115/8911/5087/107/2778/3777/8913/3708	PLCB4/AGTR1/ADCY9/CACNA1I/PBX1/ADCY1/GNAS/KCNK3/CACNA1G/ITPR1
hsa04926	Relaxin signaling pathway	114	0.355908	1.40004	0.0375056	0.0375056	0.112023	2051	tags=28%, list=17%, signal=23%	5332/2785/5601/8503/10681/115/5590/6416/5291/107/2778/408/3845/10000/1910/2775/5604/2782/5594/5605/5595/5602/3265/7423/6654/5600/5566/4318/10488/1906/109/207	PLCB4/GNG3/MAPK9/PIK3R3/GNB5/ADCY9/PRKCZ/MAP2K4/PIK3CB/ADCY1/GNAS/ARRB1/KRAS/AKT3/EDNRB/GNAO1/MAP2K1/GNB1/MAPK1/MAP2K2/MAPK3/MAPK10/HRAS/VEGFB/SOS1/MAPK11/PRKACA/MMP9/CREB3/EDN1/ADCY3/AKT1
hsa05144	Malaria	44	-0.393444	-1.43838	0.0384891	0.0384891	0.113542	2143	tags=59%, list=18%, signal=49%	3820/1440/3592/3689/1311/4615/1378/3458/975/7060/948/958/4233/3683/3082/2994/7042/959/7058/2993/6401/3576/7412/3569/6347/2995	KLRB1/CSF3/IL12A/ITGB2/COMP/MYD88/CR1/IFNG/CD81/THBS4/CD36/CD40/MET/ITGAL/HGF/GYPB/TGFB2/CD40LG/THBS2/GYPA/SELE/CXCL8/VCAM1/IL6/CCL2/GYPC
hsa04071	Sphingolipid signaling pathway	107	0.360214	1.40438	0.041514	0.041514	0.120972	1872	tags=26%, list=16%, signal=22%	5332/5601/8503/5590/5291/253782/5518/10672/9475/81537/5515/55012/3845/10000/5604/5527/5594/5526/55844/5605/5595/5602/1509/3265/56848/5600/5579/53637	PLCB4/MAPK9/PIK3R3/PRKCZ/PIK3CB/CERS6/PPP2R1A/GNA13/ROCK2/SGPP1/PPP2CA/PPP2R3C/KRAS/AKT3/MAP2K1/PPP2R5C/MAPK1/PPP2R5B/PPP2R2D/MAP2K2/MAPK3/MAPK10/CTSD/HRAS/SPHK2/MAPK11/PRKCB/S1PR5
hsa04910	Insulin signaling pathway	124	0.345731	1.37808	0.0428316	0.0428316	0.123307	2188	tags=31%, list=19%, signal=25%	5575/5601/8503/3098/5590/31/2194/5577/5291/10891/51422/5571/6720/3845/10000/5837/5604/5257/5594/7249/8569/5605/5595/5602/801/5834/5260/3265/6654/5566/10211/6009/2319/207/3632/2475/5499/23265	PRKAR1B/MAPK9/PIK3R3/HK1/PRKCZ/ACACA/FASN/PRKAR2B/PIK3CB/PPARGC1A/PRKAG2/PRKAG1/SREBF1/KRAS/AKT3/PYGM/MAP2K1/PHKB/MAPK1/TSC2/MKNK1/MAP2K2/MAPK3/MAPK10/CALM1/PYGB/PHKG1/HRAS/SOS1/PRKACA/FLOT1/RHEB/FLOT2/AKT1/INPP5A/MTOR/PPP1CA/EXOC7
hsa00062	Fatty acid elongation	14	0.607785	1.55439	0.0444791	0.0444791	0.125078	1604	tags=29%, list=14%, signal=25%	11332/6785/51102/9524	ACOT7/ELOVL4/MECR/TECR
hsa04972	Pancreatic secretion	86	0.376159	1.41249	0.0444935	0.0444935	0.125078	2274	tags=29%, list=19%, signal=24%	5332/885/491/489/481/115/107/2778/476/6262/488/3708/8766/5646/493/483/5579/7220/109/482/6522/952/23236/490/8671	PLCB4/CCK/ATP2B2/ATP2A3/ATP1B1/ADCY9/ADCY1/GNAS/ATP1A1/RYR2/ATP2A2/ITPR1/RAB11A/PRSS3/ATP2B4/ATP1B3/PRKCB/TRPC1/ADCY3/ATP1B2/SLC4A2/CD38/PLCB1/ATP2B1/SLC4A4
hsa04140	Autophagy - animal	121	0.344851	1.37003	0.0461676	0.0461676	0.128275	2732	tags=40%, list=23%, signal=31%	5601/8503/23710/5291/9110/5515/30849/3845/3708/10000/9821/5604/8678/10670/5594/7249/55255/664/5605/5580/5595/81631/5861/79065/23130/5602/1509/3265/5566/29982/10533/6009/64223/8408/207/2475/23192/29110/64798/55062/64419/1612/3667/7879/3091/9451/7248/5290/5567	MAPK9/PIK3R3/GABARAPL1/PIK3CB/MTMR4/PPP2CA/PIK3R4/KRAS/ITPR1/AKT3/RB1CC1/MAP2K1/BECN1/RRAGA/MAPK1/TSC2/WDR41/BNIP3/MAP2K2/PRKCD/MAPK3/MAP1LC3B/RAB1A/ATG9A/ATG2A/MAPK10/CTSD/HRAS/PRKACA/NRBF2/ATG7/RHEB/MLST8/ULK1/AKT1/MTOR/ATG4B/TBK1/DEPTOR/WIPI1/MTMR14/DAPK1/IRS1/RAB7A/HIF1A/EIF2AK3/TSC1/PIK3CA/PRKACB
hsa05167	Kaposi sarcoma-associated herpesvirus infection	176	-0.265622	-1.24998	0.0470272	0.0470272	0.129161	2475	tags=30%, list=21%, signal=24%	2932/3454/5970/1234/5294/5603/5155/9261/2353/3572/1021/2787/4772/595/6774/10379/1499/1230/440738/841/5609/3105/6233/4792/3445/578/1232/3551/2792/5336/3459/55970/3725/5335/6850/7314/51176/7098/3440/1026/355/3576/3569/91860/4277/3439/6932/7132/5743/3665/5295/9976	GSK3B/IFNAR1/RELA/CCR5/PIK3CG/MAPK13/PDGFB/MAPKAPK2/FOS/IL6ST/CDK6/GNG5/NFATC1/CCND1/STAT3/IRF9/CTNNB1/CCR1/MAP1LC3C/CASP8/MAP2K7/HLA-A/RPS27A/NFKBIA/IFNA8/BAK1/CCR3/IKBKB/GNGT1/PLCG2/IFNGR1/GNG12/JUN/PLCG1/SYK/UBB/LEF1/TLR3/IFNA2/CDKN1A/FAS/CXCL8/IL6/CALML4/MICB/IFNA1/TCF7/TNFRSF1A/PTGS2/IRF7/PIK3R1/CLEC2B
hsa00630	Glyoxylate and dicarboxylate metabolism	22	0.528496	1.5148	0.0486537	0.0486537	0.131602	2135	tags=50%, list=18%, signal=41%	4190/50/1738/1431/4191/5096/38/39/48/6470/5095	MDH1/ACO2/DLD/CS/MDH2/PCCB/ACAT1/ACAT2/ACO1/SHMT1/PCCA
hsa04750	Inflammatory mediator regulation of TRP channels	82	0.375243	1.39814	0.0493103	0.0493103	0.131602	2187	tags=28%, list=19%, signal=23%	5332/3358/816/5601/8503/115/818/5291/107/2778/3708/5580/41/5602/801/4914/5600/5566/5579/109/3356/5499/23236	PLCB4/HTR2C/CAMK2B/MAPK9/PIK3R3/ADCY9/CAMK2G/PIK3CB/ADCY1/GNAS/ITPR1/PRKCD/ASIC1/MAPK10/CALM1/NTRK1/MAPK11/PRKACA/PRKCB/ADCY3/HTR2A/PPP1CA/PLCB1

## Sheet: NEFM
Supplementary Table S5 |Gene Set Enrichment Analyses identification of NEFM-related signaling pathways
ID	Description	setSize	enrichmentScore	NES	pvalue	p.adjust	qvalues	rank	leading_edge	core_enrichment	gene_name
hsa05012	Parkinson disease	199	0.535272	2.33834	0.000146563	0.000146563	0.00169176	2658	tags=54%, list=23%, signal=43%	7345/7384/7280/7277/2774/6571/10381/816/7054/818/5601/291/3831/4698/9377/4719/64837/4706/6389/1537/2778/4729/10383/5709/5718/4723/5602/6531/10105/23516/5714/6263/7416/27429/4717/4722/7317/10131/203068/4705/7386/3800/6622/4704/54205/4714/374291/5708/1349/292/1345/4720/1351/5707/4713/4701/5694/4724/4702/9861/5706/4707/7419/5705/293/4891/4700/9451/5682/5689/5695/65018/801/5684/7417/4696/27089/54539/…	UCHL1/UQCRC1/TUBB2A/TUBA4A/GNAL/SLC18A2/TUBB3/CAMK2B/TH/CAMK2G/MAPK9/SLC25A4/KLC1/NDUFA5/COX5A/NDUFS1/KLC2/NDUFAB1/SDHA/CYC1/GNAS/NDUFV2/TUBB4B/PSMD3/PSMD12/NDUFV1/MAPK10/SLC6A3/PPIF/SLC39A14/PSMD8/RYR3/VDAC1/HTRA2/NDUFC1/NDUFS3/UBA1/TRAP1/TUBB/NDUFA10/UQCRFS1/KIF5C/SNCA/NDUFA9/CYCS/NDUFB8/NDUFS7/PSMD2/COX7B/SLC25A5/COX6C/NDUFS2/COX8A/PSMD1/NDUFB7/NDUFA7/PSMB6/NDUFS4/NDUFA8/PSMD6/PSMC6/NDUFB1/VDA…
hsa05208	Chemical carcinogenesis - reactive oxygen species	171	0.469979	2.01229	0.000150943	0.000150943	0.00169176	2357	tags=46%, list=20%, signal=37%	7384/1956/5601/1645/291/2947/6416/4698/9377/4719/4706/6389/1537/2053/4729/2944/5291/8503/2953/4723/5602/2946/10105/5594/4259/10000/7416/4717/4722/2052/4705/7386/2941/52/4704/4714/3265/5604/374291/1349/292/5595/1345/4720/1351/3845/4713/4701/4724/4702/4707/7419/293/5587/207/4700/6654/7417/4696/1147/27089/54539/1337/7385/4694/4712/5605/4025/1836/8517/1327/10327/7381/1340/2952/1329/4697/9446	UQCRC1/EGFR/MAPK9/AKR1C1/SLC25A4/GSTM3/MAP2K4/NDUFA5/COX5A/NDUFS1/NDUFAB1/SDHA/CYC1/EPHX2/NDUFV2/GSTM1/PIK3CB/PIK3R3/GSTT2/NDUFV1/MAPK10/GSTM2/PPIF/MAPK1/MGST3/AKT3/VDAC1/NDUFC1/NDUFS3/EPHX1/NDUFA10/UQCRFS1/GSTA4/ACP1/NDUFA9/NDUFB8/HRAS/MAP2K1/NDUFS7/COX7B/SLC25A5/MAPK3/COX6C/NDUFS2/COX8A/KRAS/NDUFB7/NDUFA7/NDUFS4/NDUFA8/NDUFB1/VDAC3/SLC25A6/PRKD1/AKT1/NDUFA6/SOS1/VDAC2/NDUFA3/CHUK/UQCRQ/NDUFB11/…
hsa04714	Thermogenesis	164	0.451621	1.92446	0.000151217	0.000151217	0.00169176	2645	tags=46%, list=22%, signal=36%	7384/6597/1353/10891/107/115/4698/1268/9377/4719/4706/51412/6389/1537/2778/4729/6604/4723/7249/6009/6197/4717/4722/4705/7386/4704/4714/3265/374291/1349/1345/4720/1351/3845/29078/114/109/4713/4701/23305/4724/4702/108/4707/5571/4700/51103/6654/4696/27089/54539/1337/51422/7385/4694/4712/1327/7381/1340/5346/1329/4697/1352/64223/2475/57104/28958/1355/51079/65260/25915/4726/10488/4695/4708	UQCRC1/SMARCA4/COX11/PPARGC1A/ADCY1/ADCY9/NDUFA5/CNR1/COX5A/NDUFS1/NDUFAB1/ACTL6B/SDHA/CYC1/GNAS/NDUFV2/SMARCD3/NDUFV1/TSC2/RHEB/RPS6KA3/NDUFC1/NDUFS3/NDUFA10/UQCRFS1/NDUFA9/NDUFB8/HRAS/NDUFS7/COX7B/COX6C/NDUFS2/COX8A/KRAS/NDUFAF4/ADCY8/ADCY3/NDUFB7/NDUFA7/ACSL6/NDUFS4/NDUFA8/ADCY2/NDUFB1/PRKAG1/NDUFA6/NDUFAF1/SOS1/NDUFA3/UQCRQ/NDUFB11/COX6A1/PRKAG2/UQCRC2/NDUFA1/NDUFB6/COX4I1/UQCRB/COX6B1/PLIN1/…
hsa05415	Diabetic cardiomyopathy	159	0.482495	2.04771	0.000151607	0.000151607	0.00169176	2350	tags=45%, list=20%, signal=37%	5332/7384/816/818/5601/291/4698/9377/4719/4706/6389/1537/4729/5590/6262/5291/183/8503/4723/5602/10105/5164/10000/7416/185/4717/4722/4705/7386/1509/23236/4704/4714/374291/1349/292/1345/4720/1351/5160/488/5162/3667/4713/4701/4724/4702/4707/7419/293/207/4700/7417/4696/27089/2997/54539/1337/7385/4694/2936/4712/489/1327/2597/4087/7381/1340/25874/1329/4697/1277	PLCB4/UQCRC1/CAMK2B/CAMK2G/MAPK9/SLC25A4/NDUFA5/COX5A/NDUFS1/NDUFAB1/SDHA/CYC1/NDUFV2/PRKCZ/RYR2/PIK3CB/AGT/PIK3R3/NDUFV1/MAPK10/PPIF/PDK2/AKT3/VDAC1/AGTR1/NDUFC1/NDUFS3/NDUFA10/UQCRFS1/CTSD/PLCB1/NDUFA9/NDUFB8/NDUFS7/COX7B/SLC25A5/COX6C/NDUFS2/COX8A/PDHA1/ATP2A2/PDHB/IRS1/NDUFB7/NDUFA7/NDUFS4/NDUFA8/NDUFB1/VDAC3/SLC25A6/AKT1/NDUFA6/VDAC2/NDUFA3/UQCRQ/GYS1/NDUFB11/COX6A1/UQCRC2/NDUFA1/GSR/NDUFB6/…
hsa05017	Spinocerebellar ataxia	130	0.529284	2.17946	0.000155135	0.000155135	0.00169176	2409	tags=47%, list=20%, signal=38%	5332/2911/2890/5601/291/3752/4976/5709/10939/5291/6712/5718/8503/2905/5602/10105/30849/10000/5714/7416/8408/23236/54205/5708/26100/292/6261/5707/25814/488/5694/8678/9861/5706/7419/5705/293/207/5682/7436/5689/5695/10524/5684/7417/5710/9821/29982/5713/5715/10213/2259/489/5685/5693/3708/23130/23369/5700/5717/2475	PLCB4/GRM1/GRIA1/MAPK9/SLC25A4/KCND3/OPA1/PSMD3/AFG3L2/PIK3CB/SPTBN2/PSMD12/PIK3R3/GRIN2C/MAPK10/PPIF/PIK3R4/AKT3/PSMD8/VDAC1/ULK1/PLCB1/CYCS/PSMD2/WIPI2/SLC25A5/RYR1/PSMD1/ATXN10/ATP2A2/PSMB6/BECN1/PSMD6/PSMC6/VDAC3/PSMC5/SLC25A6/AKT1/PSMA1/VLDLR/PSMB1/PSMB7/KAT5/PSMA3/VDAC2/PSMD4/RB1CC1/NRBF2/PSMD7/PSMD9/PSMD14/FGF14/ATP2A3/PSMA4/PSMB5/ITPR1/ATG2A/PUM2/PSMC1/PSMD11/MTOR
hsa04723	Retrograde endocannabinoid signaling	118	0.542709	2.2032	0.000157208	0.000157208	0.00169176	1468	tags=36%, list=12%, signal=32%	57084/5332/2911/2554/2890/2785/5601/107/2566/115/4698/1268/4719/4706/4729/10681/4723/5602/2558/2775/5594/4717/4722/4705/3765/23236/2915/4704/2782/4714/374291/5595/4720/114/109/4713/4701/4724/4702/3763/108/4707/4700	SLC17A6/PLCB4/GRM1/GABRA1/GRIA1/GNG3/MAPK9/ADCY1/GABRG2/ADCY9/NDUFA5/CNR1/NDUFS1/NDUFAB1/NDUFV2/GNB5/NDUFV1/MAPK10/GABRA5/GNAO1/MAPK1/NDUFC1/NDUFS3/NDUFA10/KCNJ9/PLCB1/GRM5/NDUFA9/GNB1/NDUFB8/NDUFS7/MAPK3/NDUFS2/ADCY8/ADCY3/NDUFB7/NDUFA7/NDUFS4/NDUFA8/KCNJ6/ADCY2/NDUFB1/NDUFA6
hsa04728	Dopaminergic synapse	115	0.517508	2.09299	0.000158053	0.000158053	0.00169176	1510	tags=29%, list=13%, signal=25%	50632/5332/2890/6323/2785/1644/2774/6571/816/7054/818/5601/2778/5532/10681/408/5602/5530/2775/6531/5527/10000/5518/3765/3800/5515/23236/2782/5521/3763/2931/207/55844	CALY/PLCB4/GRIA1/SCN1A/GNG3/DDC/GNAL/SLC18A2/CAMK2B/TH/CAMK2G/MAPK9/GNAS/PPP3CB/GNB5/ARRB1/MAPK10/PPP3CA/GNAO1/SLC6A3/PPP2R5C/AKT3/PPP2R1A/KCNJ9/KIF5C/PPP2CA/PLCB1/GNB1/PPP2R2B/KCNJ6/GSK3A/AKT1/PPP2R2D
hsa01200	Carbon metabolism	100	0.576637	2.28076	0.000159693	0.000159693	0.00169176	1467	tags=39%, list=12%, signal=34%	55753/2805/2026/4190/5214/10993/5213/5315/3098/8803/2821/230/10873/6389/2806/50/4199/1738/5631/226/2023/1431/3419/3421/4191/48/3420/7167/2271/5223/3418/5230/39/1737/5160/7086/5162/5224/1373	OGDHL/GOT1/ENO2/MDH1/PFKP/SDS/PFKM/PKM/HK1/SUCLA2/GPI/ALDOC/ME3/SDHA/GOT2/ACO2/ME1/DLD/PRPS1/ALDOA/ENO1/CS/IDH3A/IDH3G/MDH2/ACO1/IDH3B/TPI1/FH/PGAM1/IDH2/PGK1/ACAT2/DLAT/PDHA1/TKT/PDHB/PGAM2/CPS1
hsa04724	Glutamatergic synapse	94	0.530285	2.07657	0.000160462	0.000160462	0.00169176	1261	tags=28%, list=11%, signal=25%	57084/5332/2911/2890/2785/2744/27165/107/115/2778/5532/8605/10681/2905/5530/2775/5594/22941/81539/6505/23236/2915/2782/5595/114/109	SLC17A6/PLCB4/GRM1/GRIA1/GNG3/GLS/GLS2/ADCY1/ADCY9/GNAS/PPP3CB/PLA2G4C/GNB5/GRIN2C/PPP3CA/GNAO1/MAPK1/SHANK2/SLC38A1/SLC1A1/PLCB1/GRM5/GNB1/MAPK3/ADCY8/ADCY3
hsa00190	Oxidative phosphorylation	85	0.673785	2.59333	0.000162417	0.000162417	0.00169176	2645	tags=73%, list=22%, signal=57%	7384/526/534/1353/523/51606/4698/9377/4719/4706/155066/6389/1537/4729/4723/527/535/4717/4722/9114/4705/7386/4704/54205/4714/374291/1349/27068/1345/4720/1351/4713/9550/4701/4724/4702/4707/537/51382/4700/533/529/5464/4696/27089/54539/1337/7385/4694/479/4712/1327/7381/1340/1329/4697/1352/1355/51079/4726/4695/4708	UQCRC1/ATP6V1B2/ATP6V1G2/COX11/ATP6V1A/ATP6V1H/NDUFA5/COX5A/NDUFS1/NDUFAB1/ATP6V0E2/SDHA/CYC1/NDUFV2/NDUFV1/ATP6V0C/ATP6V0A1/NDUFC1/NDUFS3/ATP6V0D1/NDUFA10/UQCRFS1/NDUFA9/CYCS/NDUFB8/NDUFS7/COX7B/PPA2/COX6C/NDUFS2/COX8A/NDUFB7/ATP6V1G1/NDUFA7/NDUFS4/NDUFA8/NDUFB1/ATP6AP1/ATP6V1D/NDUFA6/ATP6V0B/ATP6V1E1/PPA1/NDUFA3/UQCRQ/NDUFB11/COX6A1/UQCRC2/NDUFA1/ATP12A/NDUFB6/COX4I1/UQCRB/COX6B1/COX5B/NDUFA4/C…
hsa04727	GABAergic synapse	76	0.608298	2.29516	0.000166141	0.000166141	0.00169176	1398	tags=34%, list=12%, signal=30%	2571/2572/57468/9568/2554/2785/2744/27165/6538/2550/107/23710/2566/6529/115/10681/2558/2775/81539/10243/2782/114/109/6539/3763/108	GAD1/GAD2/SLC12A5/GABBR2/GABRA1/GNG3/GLS/GLS2/SLC6A11/GABBR1/ADCY1/GABARAPL1/GABRG2/SLC6A1/ADCY9/GNB5/GABRA5/GNAO1/SLC38A1/GPHN/GNB1/ADCY8/ADCY3/SLC6A12/KCNJ6/ADCY2
hsa05230	Central carbon metabolism in cancer	66	0.592156	2.18242	0.000168577	0.000168577	0.00169176	1443	tags=41%, list=12%, signal=36%	2744/5979/5214/3815/1956/5213/27165/5315/3098/4916/5291/8503/3945/5594/10000/5223/3418/3265/5604/5595/5160/3845/5162/3939/5224/9997/207	GLS/RET/PFKP/KIT/EGFR/PFKM/GLS2/PKM/HK1/NTRK3/PIK3CB/PIK3R3/LDHB/MAPK1/AKT3/PGAM1/IDH2/HRAS/MAP2K1/MAPK3/PDHA1/KRAS/PDHB/LDHA/PGAM2/SCO2/AKT1
hsa04721	Synaptic vesicle cycle	64	0.704514	2.58142	0.000168805	0.000168805	0.00169176	1694	tags=53%, list=14%, signal=46%	6616/57084/1759/6857/6812/5864/526/534/6571/523/51606/6538/6536/26052/6529/8775/1213/155066/1173/1212/6844/527/6531/535/6505/9114/161/6539/9550/1175/51382/533/529/8218	SNAP25/SLC17A6/DNM1/SYT1/STXBP1/RAB3A/ATP6V1B2/ATP6V1G2/SLC18A2/ATP6V1A/ATP6V1H/SLC6A11/SLC6A9/DNM3/SLC6A1/NAPA/CLTC/ATP6V0E2/AP2M1/CLTB/VAMP2/ATP6V0C/SLC6A3/ATP6V0A1/SLC1A1/ATP6V0D1/AP2A2/SLC6A12/ATP6V1G1/AP2S1/ATP6V1D/ATP6V0B/ATP6V1E1/CLTCL1
hsa01230	Biosynthesis of amino acids	61	0.602722	2.19468	0.000168976	0.000168976	0.00169176	1467	tags=46%, list=12%, signal=40%	2805/2026/440/5214/10993/5213/5315/384/230/2806/50/5631/226/2023/1431/3419/3421/48/3420/7167/5223/875/3418/5230/7086/435/5224/1373	GOT1/ENO2/ASNS/PFKP/SDS/PFKM/PKM/ARG2/ALDOC/GOT2/ACO2/PRPS1/ALDOA/ENO1/CS/IDH3A/IDH3G/ACO1/IDH3B/TPI1/PGAM1/CBS/IDH2/PGK1/TKT/ASL/PGAM2/CPS1
hsa04961	Endocrine and other factor-regulated calcium reabsorption	49	0.591777	2.0682	0.00017331	0.00017331	0.00169176	1295	tags=37%, list=11%, signal=33%	1759/5332/491/793/26052/115/1213/1173/2778/1212/483/23236/161/493/476/6543/477/1175	DNM1/PLCB4/ATP2B2/CALB1/DNM3/ADCY9/CLTC/AP2M1/GNAS/CLTB/ATP1B3/PLCB1/AP2A2/ATP2B4/ATP1A1/SLC8A2/ATP1A2/AP2S1
hsa00020	Citrate cycle (TCA cycle)	30	0.753919	2.37483	0.000181719	0.000181719	0.00169176	1258	tags=60%, list=11%, signal=54%	55753/4190/47/8803/6389/50/1738/1431/3419/3421/4191/48/3420/2271/3418/1737/5160/5162	OGDHL/MDH1/ACLY/SUCLA2/SDHA/ACO2/DLD/CS/IDH3A/IDH3G/MDH2/ACO1/IDH3B/FH/IDH2/DLAT/PDHA1/PDHB
hsa00250	Alanine, aspartate and glutamate metabolism	28	0.729923	2.26039	0.000183756	0.000183756	0.00169176	1872	tags=50%, list=16%, signal=42%	2571/2572/2805/2744/440/27165/7915/2806/56954/435/1373/18/790/445	GAD1/GAD2/GOT1/GLS/ASNS/GLS2/ALDH5A1/GOT2/NIT2/ASL/CPS1/ABAT/CAD/ASS1
hsa01210	2-Oxocarboxylic acid metabolism	13	0.785309	1.99858	0.000195733	0.000195733	0.00169176	1034	tags=69%, list=9%, signal=63%	2805/2806/50/1431/3419/3421/48/3420/3418	GOT1/GOT2/ACO2/CS/IDH3A/IDH3G/ACO1/IDH3B/IDH2
hsa04672	Intestinal immune network for IgA production	40	-0.60038	-2.16323	0.000229253	0.000229253	0.00169176	3225	tags=68%, list=27%, signal=49%	3111/29851/3565/941/8741/3558/3601/3112/3600/57379/3586/3569/4055/3113/3695/942/608/6370/3108/3115/3119/3676/3109/7852/3126/6387/3122	HLA-DOA/ICOS/IL4/CD80/TNFSF13/IL2/IL15RA/HLA-DOB/IL15/AICDA/IL10/IL6/LTBR/HLA-DPA1/ITGB7/CD86/TNFRSF17/CCL25/HLA-DMA/HLA-DPB1/HLA-DQB1/ITGA4/HLA-DMB/CXCR4/HLA-DRB4/CXCL12/HLA-DRA
hsa05144	Malaria	44	-0.516201	-1.8976	0.000233209	0.000233209	0.00169176	1942	tags=43%, list=16%, signal=36%	3586/7043/4233/3569/2532/3820/948/5175/3082/7412/3576/2993/3689/3683/7097/6401/3606/6347/2995	IL10/TGFB3/MET/IL6/ACKR1/KLRB1/CD36/PECAM1/HGF/VCAM1/CXCL8/GYPA/ITGB2/ITGAL/TLR2/SELE/IL18/CCL2/GYPC
hsa05320	Autoimmune thyroid disease	46	-0.5347	-1.98402	0.00023596	0.00023596	0.00169176	3225	tags=57%, list=27%, signal=41%	3111/3441/3565/941/5551/3133/1493/3135/3558/3105/3440/3112/3106/3586/3113/942/3445/3108/355/3115/3119/3109/7253/3439/3126/3122	HLA-DOA/IFNA4/IL4/CD80/PRF1/HLA-E/CTLA4/HLA-G/IL2/HLA-A/IFNA2/HLA-DOB/HLA-B/IL10/HLA-DPA1/CD86/IFNA8/HLA-DMA/FAS/HLA-DPB1/HLA-DQB1/HLA-DMB/TSHR/IFNA1/HLA-DRB4/HLA-DRA
hsa05321	Inflammatory bowel disease	59	-0.571947	-2.24423	0.000242072	0.000242072	0.00169176	2499	tags=61%, list=21%, signal=48%	3558/59067/3561/6778/5970/3112/51561/4088/3586/7043/3593/3569/3113/50943/6095/4790/6774/3460/8809/3566/50615/3108/3595/3115/3119/3109/3605/3459/64127/3725/3126/7097/3606/7100/4094/3122	IL2/IL21/IL2RG/STAT6/RELA/HLA-DOB/IL23A/SMAD3/IL10/TGFB3/IL12B/IL6/HLA-DPA1/FOXP3/RORA/NFKB1/STAT3/IFNGR2/IL18R1/IL4R/IL21R/HLA-DMA/IL12RB2/HLA-DPB1/HLA-DQB1/HLA-DMB/IL17A/IFNGR1/NOD2/JUN/HLA-DRB4/TLR2/IL18/TLR5/MAF/HLA-DRA
hsa04612	Antigen processing and presentation	64	-0.491909	-1.96146	0.000245218	0.000245218	0.00169176	3242	tags=52%, list=28%, signal=38%	3810/4261/3111/1508/5720/567/3133/4800/5994/3135/8302/3105/3112/3106/3802/2923/3113/3305/6890/920/3309/3824/3108/3115/3119/3109/5641/3808/3823/3126/3310/3122/1520	KIR2DS5/CIITA/HLA-DOA/CTSB/PSME1/B2M/HLA-E/NFYA/RFXAP/HLA-G/KLRC4/HLA-A/HLA-DOB/HLA-B/KIR2DL1/PDIA3/HLA-DPA1/HSPA1L/TAP1/CD4/HSPA5/KLRD1/HLA-DMA/HLA-DPB1/HLA-DQB1/HLA-DMB/LGMN/KIR2DS3/KLRC3/HLA-DRB4/HSPA6/HLA-DRA/CTSS
hsa05140	Leishmaniasis	70	-0.487201	-1.97353	0.00025025	0.00025025	0.00169176	1942	tags=41%, list=16%, signal=35%	3586/7043/3593/3113/3688/653361/4790/5777/3460/1535/3108/3115/3119/3676/3109/3459/3725/4689/4792/3684/3126/3689/1536/7097/9103/2215/5743/3122/2212	IL10/TGFB3/IL12B/HLA-DPA1/ITGB1/NCF1/NFKB1/PTPN6/IFNGR2/CYBA/HLA-DMA/HLA-DPB1/HLA-DQB1/ITGA4/HLA-DMB/IFNGR1/JUN/NCF4/NFKBIA/ITGAM/HLA-DRB4/ITGB2/CYBB/TLR2/FCGR2C/FCGR3B/PTGS2/HLA-DRA/FCGR2A
hsa05150	Staphylococcus aureus infection	71	-0.610377	-2.47955	0.000251762	0.000251762	0.00169176	2257	tags=48%, list=19%, signal=39%	3112/3868/25984/2204/5724/3586/1675/1671/5340/3113/2358/3880/3426/3866/3108/3115/3119/54474/3109/719/3684/2357/3126/3689/712/3683/2213/713/9103/2215/3122/2212/728/3075	HLA-DOB/KRT16/KRT23/FCAR/PTAFR/IL10/CFD/DEFA6/PLG/HLA-DPA1/FPR2/KRT19/CFI/KRT15/HLA-DMA/HLA-DPB1/HLA-DQB1/KRT20/HLA-DMB/C3AR1/ITGAM/FPR1/HLA-DRB4/ITGB2/C1QA/ITGAL/FCGR2B/C1QB/FCGR2C/FCGR3B/HLA-DRA/FCGR2A/C5AR1/CFH
hsa04610	Complement and coagulation cascades	79	-0.479634	-1.99573	0.000252461	0.000252461	0.00169176	2596	tags=41%, list=22%, signal=32%	5055/1378/2151/2244/462/5328/3827/10877/2/2158/1675/730/5340/2165/5329/3426/5327/2159/10544/5627/719/710/3684/3689/2149/712/5265/713/728/3075/11326/2162	SERPINB2/CR1/F2RL2/FGB/SERPINC1/PLAU/KNG1/CFHR4/A2M/F9/CFD/C7/PLG/F13B/PLAUR/CFI/PLAT/F10/PROCR/PROS1/C3AR1/SERPING1/ITGAM/ITGB2/F2R/C1QA/SERPINA1/C1QB/C5AR1/CFH/VSIG4/F13A1
hsa04640	Hematopoietic cell lineage	90	-0.505215	-2.14788	0.000259471	0.000259471	0.00169176	3258	tags=59%, list=28%, signal=43%	3673/3111/910/3565/7066/945/1440/3581/924/1378/3575/3574/929/2208/2814/3112/3655/911/4254/3554/1791/1441/3569/1437/3113/3690/3568/290/3559/920/948/1435/3566/3108/3678/3115/3119/3676/1438/3109/951/915/912/930/2993/3684/1436/3126/3570/3672/2323/3122/7850	ITGA2/HLA-DOA/CD1B/IL4/THPO/CD33/CSF3/IL9R/CD7/CR1/IL7R/IL7/CD14/FCER2/GP5/HLA-DOB/ITGA6/CD1C/KITLG/IL1R1/DNTT/CSF3R/IL6/CSF2/HLA-DPA1/ITGB3/IL5RA/ANPEP/IL2RA/CD4/CD36/CSF1/IL4R/HLA-DMA/ITGA5/HLA-DPB1/HLA-DQB1/ITGA4/CSF2RA/HLA-DMB/CD37/CD3D/CD1D/CD19/GYPA/ITGAM/CSF1R/HLA-DRB4/IL6R/ITGA1/FLT3LG/HLA-DRA/IL1R2
hsa04061	Viral protein interaction with cytokine and cytokine receptor	86	-0.603689	-2.54718	0.000259943	0.000259943	0.00169176	3512	tags=74%, list=30%, signal=53%	729230/6357/8807/3572/1233/58985/8793/3577/6356/8764/6372/6369/6360/3558/3561/6375/6364/6346/10563/3586/3569/4055/2833/8794/8740/3559/6373/2920/6374/4049/6362/8809/1435/6352/51554/6354/27178/6370/1232/7132/1234/1235/3576/29949/7852/5197/6366/6363/1436/3627/3588/1230/3570/8795/6368/6387/8743/3606/7133/2919/3587/6351/6347/3579	CCR2/CCL13/IL18RAP/IL6ST/CCR4/IL22RA1/TNFRSF10D/CXCR1/CCL11/TNFRSF14/CXCL6/CCL24/CCL16/IL2/IL2RG/XCL1/CCL20/CCL1/CXCL13/IL10/IL6/LTBR/CXCR3/TNFRSF10C/TNFSF14/IL2RA/CXCL11/CXCL2/CXCL5/LTA/CCL18/IL18R1/CSF1/CCL5/ACKR4/CCL7/IL37/CCL25/CCR3/TNFRSF1A/CCR5/CCR6/CXCL8/IL19/CXCR4/PF4V1/CCL21/CCL19/CSF1R/CXCL10/IL10RB/CCR1/IL6R/TNFRSF10B/CCL23/CXCL12/TNFSF10/IL18/TNFRSF1B/CXCL1/IL10RA/CCL4/CCL2/CXCR2
hsa04064	NF-kappa B signaling pathway	93	-0.452242	-1.92864	0.000264901	0.000264901	0.00169176	3118	tags=48%, list=26%, signal=36%	8717/23586/695/4615/5971/7535/4050/8837/929/5328/596/7188/5970/5335/3932/3554/29760/4055/8792/3551/8740/79092/2920/4790/4049/5336/472/55367/7132/7412/330/7128/3576/4067/4792/6366/6363/6387/6850/597/2919/6351/5743/8915/23643	TRADD/DDX58/BTK/MYD88/RELB/ZAP70/LTB/CFLAR/CD14/PLAU/BCL2/TRAF5/RELA/PLCG1/LCK/IL1R1/BLNK/LTBR/TNFRSF11A/IKBKB/TNFSF14/CARD14/CXCL2/NFKB1/LTA/PLCG2/ATM/PIDD1/TNFRSF1A/VCAM1/BIRC3/TNFAIP3/CXCL8/LYN/NFKBIA/CCL21/CCL19/CXCL12/SYK/BCL2A1/CXCL1/CCL4/PTGS2/BCL10/LY96
hsa04670	Leukocyte transendothelial migration	99	-0.451134	-1.945	0.000266383	0.000266383	0.00169176	2467	tags=44%, list=21%, signal=35%	5293/5290/5908/5603/5906/10686/4478/5295/1364/5335/9076/4313/81/1365/10627/2773/3688/5829/653361/1366/1003/5336/29895/5175/7409/1535/3676/7414/10398/7412/399/23562/4689/50848/3684/7852/6093/5880/100506658/3689/3683/1536/6387/24146	PIK3CD/PIK3CA/RAP1B/MAPK13/RAP1A/CLDN16/MSN/PIK3R1/CLDN4/PLCG1/CLDN1/MMP2/ACTN4/CLDN3/MYL12A/GNAI3/ITGB1/PXN/NCF1/CLDN7/CDH5/PLCG2/MYLPF/PECAM1/VAV1/CYBA/ITGA4/VCL/MYL9/VCAM1/RHOH/CLDN14/NCF4/F11R/ITGAM/CXCR4/ROCK1/RAC2/OCLN/ITGB2/ITGAL/CYBB/CXCL12/CLDN15
hsa05164	Influenza A	156	-0.395414	-1.82982	0.000292569	0.000292569	0.00174808	2467	tags=37%, list=21%, signal=30%	5293/836/5290/8106/4940/7514/5295/3440/5970/3841/3112/29108/3593/3569/5340/3113/10379/3551/317/4790/57506/3460/3445/56649/114548/4600/6352/3108/1965/5611/355/3115/3119/7132/3109/3459/83447/841/1021/3576/4938/834/4792/64135/3439/3126/3627/8795/578/8743/3606/7098/91543/51284/3665/3337/6347/3122	PIK3CD/CASP3/PIK3CA/PABPN1/OAS3/XPO1/PIK3R1/IFNA2/RELA/KPNA5/HLA-DOB/PYCARD/IL12B/IL6/PLG/HLA-DPA1/IRF9/IKBKB/APAF1/NFKB1/MAVS/IFNGR2/IFNA8/TMPRSS4/NLRP3/MX2/CCL5/HLA-DMA/EIF2S1/DNAJC3/FAS/HLA-DPB1/HLA-DQB1/TNFRSF1A/HLA-DMB/IFNGR1/SLC25A31/CASP8/CDK6/CXCL8/OAS1/CASP1/NFKBIA/IFIH1/IFNA1/HLA-DRB4/CXCL10/TNFRSF10B/BAK1/TNFSF10/IL18/TLR3/RSAD2/TLR7/IRF7/DNAJB1/CCL2/HLA-DRA
hsa05202	Transcriptional misregulation in cancer	159	-0.380449	-1.76504	0.0002936	0.0002936	0.00174808	2520	tags=36%, list=21%, signal=29%	894/2119/929/8013/30012/5328/9611/1051/5970/51274/64919/4233/3569/1437/1671/6929/904/2115/4314/4297/7704/862/3065/4790/5966/6760/3695/890/1026/3206/942/5077/2313/5327/7048/472/2078/4299/4208/466/2530/2005/6667/8148/330/1848/3576/4193/1050/3684/1436/6756/578/7403/597/4094/7850	CCND2/ETV5/CD14/NR4A3/TLX3/PLAU/NCOR1/CEBPB/RELA/KLF3/BCL11B/MET/IL6/CSF2/DEFA6/TCF3/CCNT1/ETV1/MMP3/KMT2A/ZBTB16/RUNX1T1/HDAC1/NFKB1/REL/SS18/ITGB7/CCNA2/CDKN1A/HOXA10/CD86/PAX3/FLI1/PLAT/TGFBR2/ATM/ERG/AFF1/MEF2C/ATF1/FUT8/ELK4/SP1/TAF15/BIRC3/DUSP6/CXCL8/MDM2/CEBPA/ITGAM/CSF1R/SSX1/BAK1/KDM6A/BCL2A1/MAF/IL1R2
hsa05171	Coronavirus disease - COVID-19	200	-0.438391	-2.09279	0.000316156	0.000316156	0.00182533	3724	tags=58%, list=32%, signal=40%	7297/6143/6230/51065/6300/3456/59272/6156/6176/6201/629/2197/5296/3572/6232/6868/6773/2147/6193/6160/733/3441/23586/4615/1440/7311/735/9045/6161/6175/3558/5293/5290/25873/2244/5603/4312/4940/6203/1636/6181/5295/3440/5970/5335/6165/6233/6229/6167/6166/9636/1675/730/6191/6218/3593/3569/1437/6128/6188/6164/2165/10379/6141/3551/6235/140801/4314/6152/6194/4790/5599/5336/6146/6155/6157/6774/57506/6217/…	TYK2/RPL19/RPS25/RPS27L/MAPK12/IFNB1/ACE2/RPL30/RPLP1/RPS7/CFB/FAU/PIK3R2/IL6ST/RPS27/ADAM17/STAT2/F2/RPS5/RPL31/C8G/IFNA4/DDX58/MYD88/CSF3/UBA52/C9/RPL14/RPL32/RPLP0/IL2/PIK3CD/PIK3CA/RPL36/FGB/MAPK13/MMP1/OAS3/RPS9/ACE/RPLP2/PIK3R1/IFNA2/RELA/PLCG1/RPL35A/RPS27A/RPS24/RPL37/RPL36AL/ISG15/CFD/C7/RPS4X/RPS17/IL12B/IL6/CSF2/RPL6/RPS3/RPL34/F13B/IRF9/RPL18/IKBKB/RPS29/RPL10L/MMP3/RPL24/RPS6/NFKB1/M…
hsa04713	Circadian entrainment	83	0.48125	1.84286	0.000326797	0.000326797	0.00183128	1398	tags=30%, list=12%, signal=27%	5332/2890/2785/816/818/107/115/2778/116/6262/10681/2905/2775/5594/6263/3765/23236/2782/5595/6261/114/109/8911/3763/108	PLCB4/GRIA1/GNG3/CAMK2B/CAMK2G/ADCY1/ADCY9/GNAS/ADCYAP1/RYR2/GNB5/GRIN2C/GNAO1/MAPK1/RYR3/KCNJ9/PLCB1/GNB1/MAPK3/RYR1/ADCY8/ADCY3/CACNA1I/KCNJ6/ADCY2
hsa00562	Inositol phosphate metabolism	65	0.53371	1.96021	0.000337781	0.000337781	0.00183875	1282	tags=31%, list=11%, signal=28%	5332/8867/22876/5297/3631/23396/4952/55361/9110/5291/8395/7167/9896/3632/23236/5287/27124/22908/3612/51477	PLCB4/SYNJ1/INPP5F/PI4KA/INPP4A/PIP5K1C/OCRL/PI4K2A/MTMR4/PIK3CB/PIP5K1B/TPI1/FIG4/INPP5A/PLCB1/PIK3C2B/INPP5J/SACM1L/IMPA1/ISYNA1
hsa00270	Cysteine and methionine metabolism	41	0.591575	1.989	0.000353857	0.000353857	0.00187275	2189	tags=44%, list=19%, signal=36%	2805/4190/10993/2806/3945/7263/2730/4191/875/23382/1036/3939/6611/2729/6723/1786/26227/2937	GOT1/MDH1/SDS/GOT2/LDHB/TST/GCLM/MDH2/CBS/AHCYL2/CDO1/LDHA/SMS/GCLC/SRM/DNMT1/PHGDH/GSS
hsa05332	Graft-versus-host disease	36	-0.560115	-1.9621	0.00045819	0.00045819	0.00229816	3225	tags=58%, list=27%, signal=42%	3111/941/5551/3133/3135/3558/3105/3112/3106/3802/3569/3113/942/3824/3108/355/3115/3119/3109/3126/3122	HLA-DOA/CD80/PRF1/HLA-E/HLA-G/IL2/HLA-A/HLA-DOB/HLA-B/KIR2DL1/IL6/HLA-DPA1/CD86/KLRD1/HLA-DMA/FAS/HLA-DPB1/HLA-DQB1/HLA-DMB/HLA-DRB4/HLA-DRA
hsa05322	Systemic lupus erythematosus	45	-0.518261	-1.91521	0.000469043	0.000469043	0.00229816	4358	tags=67%, list=37%, signal=42%	731/2209/958/3458/727/6737/1991/959/3111/733/941/735/1511/3112/3586/81/730/3113/2903/942/3108/3115/3119/3109/3126/712/713/2215/3122/2212	C8A/FCGR1A/CD40/IFNG/C5/TRIM21/ELANE/CD40LG/HLA-DOA/C8G/CD80/C9/CTSG/HLA-DOB/IL10/ACTN4/C7/HLA-DPA1/GRIN2A/CD86/HLA-DMA/HLA-DPB1/HLA-DQB1/HLA-DMB/HLA-DRB4/C1QA/C1QB/FCGR3B/HLA-DRA/FCGR2A
hsa05133	Pertussis	65	-0.474181	-1.89827	0.000490076	0.000490076	0.00229816	2493	tags=45%, list=21%, signal=35%	929/836/5603/5970/51561/3586/29108/3593/3569/2773/3688/6374/3394/4790/5599/114548/3678/3659/710/840/3725/3576/834/3684/91860/3689/712/713/23643	CD14/CASP3/MAPK13/RELA/IL23A/IL10/PYCARD/IL12B/IL6/GNAI3/ITGB1/CXCL5/IRF8/NFKB1/MAPK8/NLRP3/ITGA5/IRF1/SERPING1/CASP7/JUN/CXCL8/CASP1/ITGAM/CALML4/ITGB2/C1QA/C1QB/LY96
hsa04540	Gap junction	80	0.483633	1.83873	0.00049595	0.00049595	0.00229816	1398	tags=29%, list=12%, signal=26%	3358/5332/2911/7280/7277/10381/1956/107/115/2778/10383/5594/203068/23236/2915/3265/5604/5595/3845/5154/114/109/108	HTR2C/PLCB4/GRM1/TUBB2A/TUBA4A/TUBB3/EGFR/ADCY1/ADCY9/GNAS/TUBB4B/MAPK1/TUBB/PLCB1/GRM5/HRAS/MAP2K1/MAPK3/KRAS/PDGFA/ADCY8/ADCY3/ADCY2
hsa04720	Long-term potentiation	61	0.530934	1.93328	0.000506928	0.000506928	0.00229816	1257	tags=30%, list=11%, signal=26%	5332/2911/2890/816/818/107/5532/2905/5530/5594/6197/23236/2915/3265/5604/5595/3845/114	PLCB4/GRM1/GRIA1/CAMK2B/CAMK2G/ADCY1/PPP3CB/GRIN2C/PPP3CA/MAPK1/RPS6KA3/PLCB1/GRM5/HRAS/MAP2K1/MAPK3/KRAS/ADCY8
hsa00010	Glycolysis / Gluconeogenesis	58	0.554924	2.00077	0.000510204	0.000510204	0.00229816	1380	tags=36%, list=12%, signal=32%	2026/5214/5213/5315/3098/5236/2821/230/1738/3945/226/2023/7167/5223/5230/1737/669/5160/5162/3939/5224	ENO2/PFKP/PFKM/PKM/HK1/PGM1/GPI/ALDOC/DLD/LDHB/ALDOA/ENO1/TPI1/PGAM1/PGK1/DLAT/BPGM/PDHA1/PDHB/LDHA/PGAM2
hsa04730	Long-term depression	51	0.555258	1.95598	0.000518672	0.000518672	0.00229816	1164	tags=35%, list=10%, signal=32%	5332/2911/2890/10842/2778/8605/2775/5594/5518/10672/5515/23236/2781/3265/5604/5595/6261/3845	PLCB4/GRM1/GRIA1/PPP1R17/GNAS/PLA2G4C/GNAO1/MAPK1/PPP2R1A/GNA13/PPP2CA/PLCB1/GNAZ/HRAS/MAP2K1/MAPK3/RYR1/KRAS
hsa04964	Proximal tubule bicarbonate reclamation	21	0.677123	1.95057	0.000563698	0.000563698	0.00240929	1539	tags=43%, list=13%, signal=37%	2744/4190/27165/358/8671/483/476/477/481	GLS/MDH1/GLS2/AQP1/SLC4A4/ATP1B3/ATP1A1/ATP1A2/ATP1B1
hsa00900	Terpenoid backbone biosynthesis	19	0.707516	1.99113	0.000569044	0.000569044	0.00240929	2714	tags=58%, list=23%, signal=45%	3422/3157/79947/51449/3156/39/23463/2224/38/4597/4598	IDI1/HMGCS1/DHDDS/PCYOX1/HMGCR/ACAT2/ICMT/FDPS/ACAT1/MVD/MVK
hsa05417	Lipid and atherosclerosis	192	-0.340738	-1.61902	0.000621891	0.000621891	0.00257579	2521	tags=36%, list=21%, signal=29%	27035/929/5293/836/5290/4893/5908/5603/5906/4312/596/1558/5295/3440/5970/5335/839/815/29108/3593/3569/3305/3551/4314/317/5451/2920/653361/4790/5599/3309/25833/6774/948/7409/3445/114548/6352/1535/1965/4775/338/355/7132/7412/841/840/3725/5609/3576/4067/22926/834/4973/4689/4792/3439/91860/1536/8795/7097/8743/6401/3606/3310/2919/3665/6347/7184/23643	NOX1/CD14/PIK3CD/CASP3/PIK3CA/NRAS/RAP1B/MAPK13/RAP1A/MMP1/BCL2/CYP2C8/PIK3R1/IFNA2/RELA/PLCG1/CASP6/CAMK2A/PYCARD/IL12B/IL6/HSPA1L/IKBKB/MMP3/APAF1/POU2F1/CXCL2/NCF1/NFKB1/MAPK8/HSPA5/POU2F3/STAT3/CD36/VAV1/IFNA8/NLRP3/CCL5/CYBA/EIF2S1/NFATC3/APOB/FAS/TNFRSF1A/VCAM1/CASP8/CASP7/JUN/MAP2K7/CXCL8/LYN/ATF6/CASP1/OLR1/NCF4/NFKBIA/IFNA1/CALML4/CYBB/TNFRSF10B/TLR2/TNFSF10/SELE/IL18/HSPA6/CXCL1/IRF7/CC…
hsa04911	Insulin secretion	74	0.486973	1.83085	0.00066589	0.00066589	0.00267533	1601	tags=31%, list=14%, signal=27%	6616/5332/5864/816/818/107/115/885/2778/116/6262/6844/27445/483/23236/476/477/114/109/108/481/1131/3781	SNAP25/PLCB4/RAB3A/CAMK2B/CAMK2G/ADCY1/ADCY9/CCK/GNAS/ADCYAP1/RYR2/VAMP2/PCLO/ATP1B3/PLCB1/ATP1A1/ATP1A2/ADCY8/ADCY3/ADCY2/ATP1B1/CHRM3/KCNN2
hsa05330	Allograft rejection	33	-0.553094	-1.89849	0.000674006	0.000674006	0.00267533	3225	tags=64%, list=27%, signal=46%	3111/3565/941/5551/3133/3135/3558/3105/3112/3106/3586/3593/3113/942/3108/355/3115/3119/3109/3126/3122	HLA-DOA/IL4/CD80/PRF1/HLA-E/HLA-G/IL2/HLA-A/HLA-DOB/HLA-B/IL10/IL12B/HLA-DPA1/CD86/HLA-DMA/FAS/HLA-DPB1/HLA-DQB1/HLA-DMB/HLA-DRB4/HLA-DRA
hsa04657	IL-17 signaling pathway	85	-0.422283	-1.77565	0.000780234	0.000780234	0.00302724	3119	tags=48%, list=26%, signal=36%	3565/8717/6356/1440/6372/4586/64806/836/5603/6364/4312/6426/7188/1051/5970/8061/3569/1437/3551/4314/2920/6374/4790/5599/6354/1994/3605/841/7128/6278/3725/3576/4792/23765/3627/2919/5743/6347/6280/6279/7184	IL4/TRADD/CCL11/CSF3/CXCL6/MUC5AC/IL25/CASP3/MAPK13/CCL20/MMP1/SRSF1/TRAF5/CEBPB/RELA/FOSL1/IL6/CSF2/IKBKB/MMP3/CXCL2/CXCL5/NFKB1/MAPK8/CCL7/ELAVL1/IL17A/CASP8/TNFAIP3/S100A7/JUN/CXCL8/NFKBIA/IL17RA/CXCL10/CXCL1/PTGS2/CCL2/S100A9/S100A8/HSP90B1
hsa04659	Th17 cell differentiation	98	-0.414245	-1.78336	0.000797236	0.000797236	0.00302724	2590	tags=46%, list=22%, signal=36%	7046/3558/59067/3561/5603/6778/5970/5335/3112/51561/3932/4088/3554/3569/3113/50943/3551/3559/919/920/6095/4790/5599/6774/3460/7048/3566/9466/50615/3108/4775/3115/3119/3109/3605/3459/3725/915/4792/3126/10148/3570/196/3556/3122	TGFBR1/IL2/IL21/IL2RG/MAPK13/STAT6/RELA/PLCG1/HLA-DOB/IL23A/LCK/SMAD3/IL1R1/IL6/HLA-DPA1/FOXP3/IKBKB/IL2RA/CD247/CD4/RORA/NFKB1/MAPK8/STAT3/IFNGR2/TGFBR2/IL4R/IL27RA/IL21R/HLA-DMA/NFATC3/HLA-DPB1/HLA-DQB1/HLA-DMB/IL17A/IFNGR1/JUN/CD3D/NFKBIA/HLA-DRB4/EBI3/IL6R/AHR/IL1RAP/HLA-DRA
hsa04922	Glucagon signaling pathway	88	0.463442	1.7942	0.00081367	0.00081367	0.00302724	1912	tags=32%, list=16%, signal=27%	5332/5214/816/10891/5213/818/5315/5837/2778/5532/31/3945/5530/10000/5223/23236/5160/5162/3939/5224/108/207/5571/801/2997/51422/5834/5531	PLCB4/PFKP/CAMK2B/PPARGC1A/PFKM/CAMK2G/PKM/PYGM/GNAS/PPP3CB/ACACA/LDHB/PPP3CA/AKT3/PGAM1/PLCB1/PDHA1/PDHB/LDHA/PGAM2/ADCY2/AKT1/PRKAG1/CALM1/GYS1/PRKAG2/PYGB/PPP4C
hsa04380	Osteoclast differentiation	123	-0.383909	-1.70996	0.000826219	0.000826219	0.00302724	2590	tags=41%, list=22%, signal=32%	7046/27035/5293/5290/5603/5295/5970/8061/3932/9846/3554/11024/29760/10990/353514/3690/10379/8792/3551/10288/653361/4790/5599/5336/3460/1435/7048/1535/23547/4982/10859/7132/11006/3459/3725/5609/3937/4689/4792/1436/7305/10326/11027/11025/2213/6850/9103/2215/2212/54209	TGFBR1/NOX1/PIK3CD/PIK3CA/MAPK13/PIK3R1/RELA/FOSL1/LCK/GAB2/IL1R1/LILRA1/BLNK/LILRB5/LILRA5/ITGB3/IRF9/TNFRSF11A/IKBKB/LILRB2/NCF1/NFKB1/MAPK8/PLCG2/IFNGR2/CSF1/TGFBR2/CYBA/LILRA4/TNFRSF11B/LILRB1/TNFRSF1A/LILRB4/IFNGR1/JUN/MAP2K7/LCP2/NCF4/NFKBIA/CSF1R/TYROBP/SIRPB1/LILRA2/LILRB3/FCGR2B/SYK/FCGR2C/FCGR3B/FCGR2A/TREM2
hsa05310	Asthma	26	-0.589817	-1.91498	0.000868998	0.000868998	0.00312391	3225	tags=69%, list=27%, signal=50%	3111/3565/6356/5553/3112/3578/3586/3113/2205/8288/3108/3115/3119/3109/6037/3126/2207/3122	HLA-DOA/IL4/CCL11/PRG2/HLA-DOB/IL9/IL10/HLA-DPA1/FCER1A/EPX/HLA-DMA/HLA-DPB1/HLA-DQB1/HLA-DMB/RNASE3/HLA-DRB4/FCER1G/HLA-DRA
hsa00051	Fructose and mannose metabolism	28	0.614589	1.90323	0.00091878	0.00091878	0.0032417	1142	tags=32%, list=10%, signal=29%	5214/5213/3098/230/4351/6652/226/7167/231	PFKP/PFKM/HK1/ALDOC/MPI/SORD/ALDOA/TPI1/AKR1B1
hsa01240	Biosynthesis of cofactors	105	0.438273	1.74697	0.000955718	0.000955718	0.00327703	2811	tags=42%, list=24%, signal=32%	23057/55312/8836/4830/4351/1738/8566/5805/2730/23475/10243/7360/8630/7389/9054/51805/203/51109/80025/2729/5498/2356/1503/790/3145/211/2235/51727/4337/10327/4522/2937/7390/158/1352/55163/224/1355/27010/217/79717/5372/79001/586	NMNAT2/RFK/GGH/NME1/MPI/DLD/PDXK/PTS/GCLM/QPRT/GPHN/UGP2/HSD17B6/UROD/NFS1/COQ3/AK1/RDH11/PANK2/GCLC/PPOX/FPGS/CTPS1/CAD/HMBS/ALAS1/FECH/CMPK1/MOCS1/AKR1A1/MTHFD1/GSS/UROS/ADSL/COX10/PNPO/ALDH3A2/COX15/TPK1/ALDH2/PPCS/PMM1/VKORC1/BCAT1
hsa00220	Arginine biosynthesis	17	0.701342	1.91889	0.000964878	0.000964878	0.00327703	1872	tags=47%, list=16%, signal=40%	2805/2744/27165/384/2806/435/1373/445	GOT1/GLS/GLS2/ARG2/GOT2/ASL/CPS1/ASS1
hsa04070	Phosphatidylinositol signaling system	83	0.452112	1.73128	0.000980392	0.000980392	0.00327703	1141	tags=24%, list=10%, signal=22%	5332/8867/22876/5297/3631/23396/4952/55361/9110/5291/8503/8395/8760/3632/9677/23236/23262/5287/22908/3612	PLCB4/SYNJ1/INPP5F/PI4KA/INPP4A/PIP5K1C/OCRL/PI4K2A/MTMR4/PIK3CB/PIK3R3/PIP5K1B/CDS2/INPP5A/PPIP5K1/PLCB1/PPIP5K2/PIK3C2B/SACM1L/IMPA1
hsa00620	Pyruvate metabolism	40	0.557608	1.8657	0.00106383	0.00106383	0.00349461	2699	tags=60%, list=23%, signal=46%	4190/5315/10873/31/4199/1738/3945/4191/2271/39/1737/5160/2739/5162/3939/5091/10327/38/97/224/3029/217/9380/32	MDH1/PKM/ME3/ACACA/ME1/DLD/LDHB/MDH2/FH/ACAT2/DLAT/PDHA1/GLO1/PDHB/LDHA/PC/AKR1A1/ACAT1/ACYP1/ALDH3A2/HAGH/ALDH2/GRHPR/ACACB
hsa04260	Cardiac muscle contraction	70	0.478953	1.78491	0.0011655	0.0011655	0.00376371	2364	tags=43%, list=20%, signal=34%	7384/9254/10479/55799/9377/1537/6262/784/483/7386/1349/1345/1351/782/476/6543/477/488/481/444/27089/1337/7385/489/1327/7381/1340/6548/1329/482	UQCRC1/CACNA2D2/SLC9A6/CACNA2D3/COX5A/CYC1/RYR2/CACNB3/ATP1B3/UQCRFS1/COX7B/COX6C/COX8A/CACNB1/ATP1A1/SLC8A2/ATP1A2/ATP2A2/ATP1B1/ASPH/UQCRQ/COX6A1/UQCRC2/ATP2A3/COX4I1/UQCRB/COX6B1/SLC9A1/COX5B/ATP1B2
hsa04725	Cholinergic synapse	96	0.44365	1.74318	0.00128308	0.00128308	0.00407434	1443	tags=27%, list=12%, signal=24%	5332/3785/2785/43/816/818/107/115/5291/10681/8503/2775/5594/10000/3761/23236/2782/3265/5604/5595/3845/114/109/3763/108/207	PLCB4/KCNQ2/GNG3/ACHE/CAMK2B/CAMK2G/ADCY1/ADCY9/PIK3CB/GNB5/PIK3R3/GNAO1/MAPK1/AKT3/KCNJ4/PLCB1/GNB1/HRAS/MAP2K1/MAPK3/KRAS/ADCY8/ADCY3/KCNJ6/ADCY2/AKT1
hsa05110	Vibrio cholerae infection	42	0.531387	1.79515	0.00141193	0.00141193	0.00441	1642	tags=40%, list=14%, signal=35%	526/534/523/51606/115/155066/55176/2778/527/535/9114/109/9550/537/51382/533/529	ATP6V1B2/ATP6V1G2/ATP6V1A/ATP6V1H/ADCY9/ATP6V0E2/SEC61A2/GNAS/ATP6V0C/ATP6V0A1/ATP6V0D1/ADCY3/ATP6V1G1/ATP6AP1/ATP6V1D/ATP6V0B/ATP6V1E1
hsa04929	GnRH secretion	59	0.489021	1.7658	0.00153296	0.00153296	0.00465186	1601	tags=32%, list=14%, signal=28%	9568/5332/2550/5291/8503/408/5594/10000/610/3765/23236/3265/5604/5595/3845/8911/3763/207/3781	GABBR2/PLCB4/GABBR1/PIK3CB/PIK3R3/ARRB1/MAPK1/AKT3/HCN2/KCNJ9/PLCB1/HRAS/MAP2K1/MAPK3/KRAS/CACNA1I/KCNJ6/AKT1/KCNN2
hsa05031	Amphetamine addiction	57	0.510795	1.83444	0.0015382	0.0015382	0.00465186	619	tags=19%, list=5%, signal=18%	2890/1644/6571/816/7054/818/2778/5532/2905/5530/6531	GRIA1/DDC/SLC18A2/CAMK2B/TH/CAMK2G/GNAS/PPP3CB/GRIN2C/PPP3CA/SLC6A3
hsa05340	Primary immunodeficiency	33	-0.532746	-1.82865	0.00157268	0.00157268	0.00468183	3681	tags=73%, list=31%, signal=50%	959/326/5896/973/4261/29851/695/7535/5994/3575/3561/100/3543/57379/3932/64421/29760/7374/6890/920/5897/915/930/5788	CD40LG/AIRE/RAG1/CD79A/CIITA/ICOS/BTK/ZAP70/RFXAP/IL7R/IL2RG/ADA/IGLL1/AICDA/LCK/DCLRE1C/BLNK/UNG/TAP1/CD4/RAG2/CD3D/CD19/PTPRC
hsa00030	Pentose phosphate pathway	25	0.615405	1.855	0.00166852	0.00166852	0.00489072	588	tags=28%, list=5%, signal=27%	5214/5213/5236/2821/230/5631/226	PFKP/PFKM/PGM1/GPI/ALDOC/PRPS1/ALDOA
hsa00480	Glutathione metabolism	43	0.5234	1.77667	0.00176243	0.00176243	0.0050877	2357	tags=49%, list=20%, signal=39%	2947/2944/2953/2946/4259/2878/2730/2879/2941/26873/3418/79094/6611/79017/2729/6723/2936/5226/2937/2952/9446	GSTM3/GSTM1/GSTT2/GSTM2/MGST3/GPX3/GCLM/GPX4/GSTA4/OPLAH/IDH2/CHAC1/SMS/GGCT/GCLC/SRM/GSR/PGD/GSS/GSTT1/GSTO1
hsa05032	Morphine addiction	76	0.461637	1.74179	0.00182755	0.00182755	0.00519695	1398	tags=25%, list=12%, signal=22%	9568/2554/2785/5141/2550/107/2566/115/2778/10681/408/2558/2775/3765/2782/114/109/3763/108	GABBR2/GABRA1/GNG3/PDE4A/GABBR1/ADCY1/GABRG2/ADCY9/GNAS/GNB5/ARRB1/GABRA5/GNAO1/KCNJ9/GNB1/ADCY8/ADCY3/KCNJ6/ADCY2
hsa05416	Viral myocarditis	54	-0.458327	-1.76175	0.00192725	0.00192725	0.00539987	3037	tags=56%, list=26%, signal=41%	959/6444/60/3111/941/5551/3133/842/3135/4624/27/836/3105/3112/3106/6442/3113/942/3108/857/3115/3119/3109/841/6445/3126/5880/3689/3683/3122	CD40LG/SGCD/ACTB/HLA-DOA/CD80/PRF1/HLA-E/CASP9/HLA-G/MYH6/ABL2/CASP3/HLA-A/HLA-DOB/HLA-B/SGCA/HLA-DPA1/CD86/HLA-DMA/CAV1/HLA-DPB1/HLA-DQB1/HLA-DMB/CASP8/SGCG/HLA-DRB4/RAC2/ITGB2/ITGAL/HLA-DRA
hsa05152	Tuberculosis	161	-0.331522	-1.53977	0.00207223	0.00207223	0.00568462	3242	tags=44%, list=28%, signal=32%	4261/3111/3717/3441/8717/4615/50617/208/2033/387/842/4800/5994/7096/1378/929/836/4046/5603/596/1051/3440/5970/3112/3916/8767/815/51561/3586/7043/3593/3569/3113/317/4790/5599/64581/1263/8411/3460/3445/3108/26253/22925/3115/3119/7132/3109/3459/841/64127/3684/3439/10312/3126/91860/3689/3588/4360/7097/2207/2213/3606/6850/9103/3587/2215/8915/3122/2212/1520	CIITA/HLA-DOA/JAK2/IFNA4/TRADD/MYD88/ATP6V0A4/AKT2/EP300/RHOA/CASP9/NFYA/RFXAP/TLR1/CR1/CD14/CASP3/LSP1/MAPK13/BCL2/CEBPB/IFNA2/RELA/HLA-DOB/LAMP1/RIPK2/CAMK2A/IL23A/IL10/TGFB3/IL12B/IL6/HLA-DPA1/APAF1/NFKB1/MAPK8/CLEC7A/PLK3/EEA1/IFNGR2/IFNA8/HLA-DMA/CLEC4E/PLA2R1/HLA-DPB1/HLA-DQB1/TNFRSF1A/HLA-DMB/IFNGR1/CASP8/NOD2/ITGAM/IFNA1/TCIRG1/HLA-DRB4/CALML4/ITGB2/IL10RB/MRC1/TLR2/FCER1G/FCGR2B/IL18/SYK…
hsa00430	Taurine and hypotaurine metabolism	12	0.74831	1.86608	0.00216025	0.00216025	0.00568462	6	tags=17%, list=0%, signal=17%	2571/2572	GAD1/GAD2
hsa04932	Non-alcoholic fatty liver disease	134	0.404641	1.67384	0.00216216	0.00216216	0.00568462	1958	tags=35%, list=17%, signal=30%	7384/5601/4698/9377/4719/4706/6389/1537/6720/4729/5291/8503/4723/5602/10000/4717/4722/4705/7386/51085/4704/54205/4714/374291/1349/1345/4720/1351/3667/4713/4701/4724/4702/4707/2931/207/5571/4700/9451/4696/27089/54539/1337/51422/7385/4694/4712	UQCRC1/MAPK9/NDUFA5/COX5A/NDUFS1/NDUFAB1/SDHA/CYC1/SREBF1/NDUFV2/PIK3CB/PIK3R3/NDUFV1/MAPK10/AKT3/NDUFC1/NDUFS3/NDUFA10/UQCRFS1/MLXIPL/NDUFA9/CYCS/NDUFB8/NDUFS7/COX7B/COX6C/NDUFS2/COX8A/IRS1/NDUFB7/NDUFA7/NDUFS4/NDUFA8/NDUFB1/GSK3A/AKT1/PRKAG1/NDUFA6/EIF2AK3/NDUFA3/UQCRQ/NDUFB11/COX6A1/PRKAG2/UQCRC2/NDUFA1/NDUFB6
hsa05033	Nicotine addiction	31	0.583889	1.8537	0.00216998	0.00216998	0.00568462	586	tags=19%, list=5%, signal=18%	57084/2554/2890/2566/2905/2558	SLC17A6/GABRA1/GRIA1/GABRG2/GRIN2C/GABRA5
hsa04650	Natural killer cell mediated cytotoxicity	111	-0.379064	-1.65924	0.00217806	0.00217806	0.00568462	2467	tags=37%, list=21%, signal=29%	5293/836/5290/4893/3105/5295/3440/5335/3106/3932/51744/3802/1437/962/100507436/80329/919/5777/5336/3384/3460/7409/3445/3824/9437/355/3459/3808/3823/3937/3439/5880/7305/3689/3683/8795/4277/2207/8743/6850/2215	PIK3CD/CASP3/PIK3CA/NRAS/HLA-A/PIK3R1/IFNA2/PLCG1/HLA-B/LCK/CD244/KIR2DL1/CSF2/CD48/MICA/ULBP1/CD247/PTPN6/PLCG2/ICAM2/IFNGR2/VAV1/IFNA8/KLRD1/NCR1/FAS/IFNGR1/KIR2DS3/KLRC3/LCP2/IFNA1/RAC2/TYROBP/ITGB2/ITGAL/TNFRSF10B/MICB/FCER1G/TNFSF10/SYK/FCGR3B
hsa05134	Legionellosis	50	-0.464294	-1.75254	0.00236967	0.00236967	0.00602948	2592	tags=52%, list=22%, signal=41%	1378/929/836/5970/29108/3593/3569/3305/317/2920/4790/57396/1195/841/840/3576/834/4792/3684/51128/3689/7097/3606/7100/3310/2919	CR1/CD14/CASP3/RELA/PYCARD/IL12B/IL6/HSPA1L/APAF1/CXCL2/NFKB1/CLK4/CLK1/CASP8/CASP7/CXCL8/CASP1/NFKBIA/ITGAM/SAR1B/ITGB2/TLR2/IL18/TLR5/HSPA6/CXCL1
hsa04668	TNF signaling pathway	101	-0.379467	-1.6413	0.00240128	0.00240128	0.00602948	2495	tags=43%, list=21%, signal=34%	90993/5293/836/5290/5603/6364/7188/1051/5295/5970/3600/3569/1437/3551/4314/2920/6374/4790/4049/5599/64764/8809/1435/6352/355/3659/7132/7412/330/841/7128/64127/840/3725/5609/4792/3627/1326/6401/7133/2919/5743/6347	CREB3L1/PIK3CD/CASP3/PIK3CA/MAPK13/CCL20/TRAF5/CEBPB/PIK3R1/RELA/IL15/IL6/CSF2/IKBKB/MMP3/CXCL2/CXCL5/NFKB1/LTA/MAPK8/CREB3L2/IL18R1/CSF1/CCL5/FAS/IRF1/TNFRSF1A/VCAM1/BIRC3/CASP8/TNFAIP3/NOD2/CASP7/JUN/MAP2K7/NFKBIA/CXCL10/MAP3K8/SELE/TNFRSF1B/CXCL1/PTGS2/CCL2
hsa05145	Toxoplasmosis	102	-0.37842	-1.64001	0.00240513	0.00240513	0.00602948	3326	tags=49%, list=28%, signal=35%	329/7042/4261/3111/3717/3918/3911/4615/208/842/22798/79444/836/5603/596/5970/3112/3655/3586/7043/3593/3915/3113/2773/3688/3305/3551/240/4790/5599/6774/3460/3108/3115/3119/7132/1234/3109/3459/330/841/3912/4792/3126/3588/7097/3310/3587/3122/23643	BIRC2/TGFB2/CIITA/HLA-DOA/JAK2/LAMC2/LAMA5/MYD88/AKT2/CASP9/LAMB4/BIRC7/CASP3/MAPK13/BCL2/RELA/HLA-DOB/ITGA6/IL10/TGFB3/IL12B/LAMC1/HLA-DPA1/GNAI3/ITGB1/HSPA1L/IKBKB/ALOX5/NFKB1/MAPK8/STAT3/IFNGR2/HLA-DMA/HLA-DPB1/HLA-DQB1/TNFRSF1A/CCR5/HLA-DMB/IFNGR1/BIRC3/CASP8/LAMB1/NFKBIA/HLA-DRB4/IL10RB/TLR2/HSPA6/IL10RA/HLA-DRA/LY96
hsa04261	Adrenergic signaling in cardiomyocytes	129	0.40664	1.67309	0.00248332	0.00248332	0.00614464	1726	tags=29%, list=15%, signal=25%	5332/491/816/818/107/9254/115/55799/2778/6262/183/6324/5527/5594/10000/784/5518/185/483/5515/23236/5595/782/493/476/5521/6543/477/488/114/109/108/207/55844/481/5502/801/55012	PLCB4/ATP2B2/CAMK2B/CAMK2G/ADCY1/CACNA2D2/ADCY9/CACNA2D3/GNAS/RYR2/AGT/SCN1B/PPP2R5C/MAPK1/AKT3/CACNB3/PPP2R1A/AGTR1/ATP1B3/PPP2CA/PLCB1/MAPK3/CACNB1/ATP2B4/ATP1A1/PPP2R2B/SLC8A2/ATP1A2/ATP2A2/ADCY8/ADCY3/ADCY2/AKT1/PPP2R2D/ATP1B1/PPP1R1A/CALM1/PPP2R3C
hsa04062	Chemokine signaling pathway	167	-0.323973	-1.51243	0.00268017	0.00268017	0.0065467	2467	tags=37%, list=21%, signal=29%	5293/5290/4893/6375/5908/5906/6364/10663/5295/5970/5335/409/6346/10563/2833/2787/2773/3551/6373/2920/5829/653361/6374/4790/5336/2309/6774/6362/7409/2792/6352/6354/6370/1232/2870/112/1234/1235/3576/4067/5568/4792/7852/5197/6093/6366/6363/113/5880/3627/7454/1230/3055/6368/6387/2919/6351/6347/2268/3579/1794	PIK3CD/PIK3CA/NRAS/XCL1/RAP1B/RAP1A/CCL20/CXCR6/PIK3R1/RELA/PLCG1/ARRB2/CCL1/CXCL13/CXCR3/GNG5/GNAI3/IKBKB/CXCL11/CXCL2/PXN/NCF1/CXCL5/NFKB1/PLCG2/FOXO3/STAT3/CCL18/VAV1/GNGT1/CCL5/CCL7/CCL25/CCR3/GRK6/ADCY6/CCR5/CCR6/CXCL8/LYN/PRKACG/NFKBIA/CXCR4/PF4V1/ROCK1/CCL21/CCL19/ADCY7/RAC2/CXCL10/WAS/CCR1/HCK/CCL23/CXCL12/CXCL1/CCL4/CCL2/FGR/CXCR2/DOCK2
hsa01250	Biosynthesis of nucleotide sugars	30	0.571042	1.79877	0.00345266	0.00345266	0.00823126	878	tags=27%, list=7%, signal=25%	3098/5236/2821/55907/2592/4351/54187/7360	HK1/PGM1/GPI/CMAS/GALT/MPI/NANS/UGP2
hsa04621	NOD-like receptor signaling pathway	146	-0.333055	-1.52281	0.00345622	0.00345622	0.00823126	2390	tags=33%, list=20%, signal=27%	5603/4940/596/7188/79792/9140/3440/5970/8767/29108/3569/1671/10379/3551/3428/2920/4790/5599/55054/57506/3445/837/114548/6352/1535/440738/838/3710/10628/330/10135/841/9051/7128/64127/3725/3576/4938/834/4792/3439/1536/3606/2919/3665/6347/2634/2633	MAPK13/OAS3/BCL2/TRAF5/GSDMD/ATG12/IFNA2/RELA/RIPK2/PYCARD/IL6/DEFA6/IRF9/IKBKB/IFI16/CXCL2/NFKB1/MAPK8/ATG16L1/MAVS/IFNA8/CASP4/NLRP3/CCL5/CYBA/MAP1LC3C/CASP5/ITPR3/TXNIP/BIRC3/NAMPT/CASP8/PSTPIP1/TNFAIP3/NOD2/JUN/CXCL8/OAS1/CASP1/NFKBIA/IFNA1/CYBB/IL18/CXCL1/IRF7/CCL2/GBP2/GBP1
hsa04114	Oocyte meiosis	97	0.414654	1.63146	0.00352451	0.00352451	0.00829027	2629	tags=39%, list=22%, signal=31%	7533/816/818/107/115/5532/5530/5527/5594/7531/8379/6197/5518/5515/22849/5604/5595/114/109/108/9232/891/7529/25847/801/29882/898/996/8454/7534/3708/5526/5528/9748/9985/5534/25906/991	YWHAH/CAMK2B/CAMK2G/ADCY1/ADCY9/PPP3CB/PPP3CA/PPP2R5C/MAPK1/YWHAE/MAD1L1/RPS6KA3/PPP2R1A/PPP2CA/CPEB3/MAP2K1/MAPK3/ADCY8/ADCY3/ADCY2/PTTG1/CCNB1/YWHAB/ANAPC13/CALM1/ANAPC2/CCNE1/CDC27/CUL1/YWHAZ/ITPR1/PPP2R5B/PPP2R5D/SLK/REC8/PPP3R1/ANAPC15/CDC20
hsa05169	Epstein-Barr virus infection	190	-0.30155	-1.43007	0.00371747	0.00371747	0.0086022	2520	tags=35%, list=21%, signal=28%	894/5293/836/5290/5603/3105/2208/4940/596/7188/5295/3440/5970/3112/3106/11317/9636/22938/29760/3569/2923/3113/10018/10379/3551/919/6890/317/3065/4790/7431/4734/5599/5336/890/1026/6774/57506/3445/3108/355/3115/3119/3109/841/7128/864/953/1021/3725/5609/6502/4067/4938/915/4193/930/4792/3439/3126/3627/3683/7097/578/6850/3665/3122	CCND2/PIK3CD/CASP3/PIK3CA/MAPK13/HLA-A/FCER2/OAS3/BCL2/TRAF5/PIK3R1/IFNA2/RELA/HLA-DOB/HLA-B/RBPJL/ISG15/SNW1/BLNK/IL6/PDIA3/HLA-DPA1/BCL2L11/IRF9/IKBKB/CD247/TAP1/APAF1/HDAC1/NFKB1/VIM/NEDD4/MAPK8/PLCG2/CCNA2/CDKN1A/STAT3/MAVS/IFNA8/HLA-DMA/FAS/HLA-DPB1/HLA-DQB1/HLA-DMB/CASP8/TNFAIP3/RUNX3/ENTPD1/CDK6/JUN/MAP2K7/SKP2/LYN/OAS1/CD3D/MDM2/CD19/NFKBIA/IFNA1/HLA-DRB4/CXCL10/ITGAL/TLR2/BAK1/SYK/IRF7/H…
hsa00650	Butanoate metabolism	22	0.615908	1.79798	0.00374742	0.00374742	0.0086022	1585	tags=36%, list=13%, signal=32%	2571/2572/7915/3157/39/5019/18/65985	GAD1/GAD2/ALDH5A1/HMGCS1/ACAT2/OXCT1/ABAT/AACS
hsa04630	JAK-STAT signaling pathway	145	-0.325224	-1.48357	0.00491188	0.00491188	0.0111068	3876	tags=52%, list=33%, signal=35%	3454/6655/5156/3467/7297/3563/5008/3456/1950/5296/3572/3977/6773/58985/3717/3441/3565/7066/1440/3581/208/2033/1439/30837/3575/9180/894/3574/3558/3601/5293/5290/59067/3561/596/6778/5295/3440/3600/64109/51561/3578/5159/3586/1441/3593/3569/1437/3952/3568/10379/3597/3559/5777/5155/1026/6774/3460/3445/3566/4170/9466/50615/5292/5771/3595/1438/2688/3459/29949/5618/3439/3588/3570/3587	IFNAR1/SOS2/PDGFRA/IFNW1/TYK2/IL3RA/OSM/IFNB1/EGF/PIK3R2/IL6ST/LIFR/STAT2/IL22RA1/JAK2/IFNA4/IL4/THPO/CSF3/IL9R/AKT2/EP300/CSF2RB/SOCS7/IL7R/OSMR/CCND2/IL7/IL2/IL15RA/PIK3CD/PIK3CA/IL21/IL2RG/BCL2/STAT6/PIK3R1/IFNA2/IL15/CRLF2/IL23A/IL9/PDGFRB/IL10/CSF3R/IL12B/IL6/CSF2/LEP/IL5RA/IRF9/IL13RA1/IL2RA/PTPN6/PDGFB/CDKN1A/STAT3/IFNGR2/IFNA8/IL4R/MCL1/IL27RA/IL21R/PIM1/PTPN2/IL12RB2/CSF2RA/GH1/IFNGR1/IL…
hsa04072	Phospholipase D signaling pathway	131	0.384556	1.58538	0.00495509	0.00495509	0.0111068	1443	tags=25%, list=12%, signal=22%	1759/5332/2911/3815/1956/107/26052/23396/115/2778/8605/5291/183/8503/7249/5594/8395/10000/6009/10672/185/23236/2915/3265/5604/56848/5595/3845/5154/114/109/108/207	DNM1/PLCB4/GRM1/KIT/EGFR/ADCY1/DNM3/PIP5K1C/ADCY9/GNAS/PLA2G4C/PIK3CB/AGT/PIK3R3/TSC2/MAPK1/PIP5K1B/AKT3/RHEB/GNA13/AGTR1/PLCB1/GRM5/HRAS/MAP2K1/SPHK2/MAPK3/KRAS/PDGFA/ADCY8/ADCY3/ADCY2/AKT1
hsa03050	Proteasome	41	0.506223	1.70203	0.00530786	0.00530786	0.0116902	3599	tags=80%, list=31%, signal=56%	5709/5718/5714/5708/5707/10197/5694/9861/5706/5705/5682/5689/5695/5684/5710/5713/5715/10213/5685/5693/5700/5717/5692/5719/5699/5686/5688/5690/11047/5702/5704/51371/9491	PSMD3/PSMD12/PSMD8/PSMD2/PSMD1/PSME3/PSMB6/PSMD6/PSMC6/PSMC5/PSMA1/PSMB1/PSMB7/PSMA3/PSMD4/PSMD7/PSMD9/PSMD14/PSMA4/PSMB5/PSMC1/PSMD11/PSMB4/PSMD13/PSMB10/PSMA5/PSMA7/PSMB2/ADRM1/PSMC3/PSMC4/POMP/PSMF1
hsa05130	Pathogenic Escherichia coli infection	169	-0.311295	-1.45663	0.00533808	0.00533808	0.0116902	2390	tags=34%, list=20%, signal=27%	5603/7009/84617/10686/5970/1364/9076/10163/10458/3554/9181/29108/3569/1365/6188/3688/3551/3071/1366/4790/4641/4642/3059/5777/2768/5599/4690/837/2846/114548/1902/355/7132/79861/10109/841/840/7456/3725/3576/81027/834/23562/4542/4792/9871/6093/100506658/2149/8795/578/10095/8743/3606/7100/2212/24146	MAPK13/TMBIM6/TUBB6/CLDN16/RELA/CLDN4/CLDN1/WASF2/BAIAP2/IL1R1/ARHGEF2/PYCARD/IL6/CLDN3/RPS3/ITGB1/IKBKB/NCKAP1L/CLDN7/NFKB1/MYO1C/MYO1D/HCLS1/PTPN6/GNA12/MAPK8/NCK1/CASP4/LPAR4/NLRP3/LPAR1/FAS/TNFRSF1A/TUBAL3/ARPC2/CASP8/CASP7/WIPF1/JUN/CXCL8/TUBB1/CASP1/CLDN14/MYO1F/NFKBIA/SEC24D/ROCK1/OCLN/F2R/TNFRSF10B/BAK1/ARPC1B/TNFSF10/IL18/TLR5/FCGR2A/CLDN15
hsa04144	Endocytosis	199	0.341033	1.48981	0.00542283	0.00542283	0.0117408	2413	tags=31%, list=20%, signal=25%	273/1759/6456/10193/56904/30845/440073/1956/26052/23396/1213/1173/60682/5590/55040/1212/408/8027/8395/26056/9525/8723/8853/10552/9922/3800/116987/9829/3265/55737/81873/161/57403/1175/11059/10564/79643/50855/9101/9146/8218/25978/6457/10097/9727/51160/8766/3949/84364/5868/4087/57180/2869/5869/11311/55738/1211/2261/830/51324/7879	AMPH/DNM1/SH3GL2/RNF41/SH3GLB2/EHD3/IQSEC3/EGFR/DNM3/PIP5K1C/CLTC/AP2M1/SMAP1/PRKCZ/EPN3/CLTB/ARRB1/STAM/PIP5K1B/RAB11FIP5/VPS4B/SNX4/ASAP2/ARPC1A/IQSEC1/KIF5C/AGAP1/DNAJC6/HRAS/VPS35/ARPC5L/AP2A2/RAB22A/AP2S1/WWP1/ARFGEF2/CHMP6/PARD6A/USP8/HGS/CLTCL1/CHMP2B/SH3GL3/ACTR2/RAB11FIP3/VPS28/RAB11A/LDLR/ARFGAP2/RAB5A/SMAD2/ACTR3B/GRK5/RAB5B/VPS45/ARFGAP1/CLTA/FGFR3/CAPZA2/SPG21/RAB7A
hsa05162	Measles	128	-0.33657	-1.50664	0.00561956	0.00561956	0.01203	3140	tags=40%, list=27%, signal=30%	3441/8717/7161/23586/4615/7157/208/842/894/3558/5293/836/5290/3561/868/4940/596/4478/5295/3440/5970/3593/3569/10379/3305/3551/3559/317/4790/5599/6774/57506/3445/4600/1965/355/841/7128/1021/3725/4938/915/4792/64135/3439/7097/578/2213/3310/51284/3665	IFNA4/TRADD/TP73/DDX58/MYD88/TP53/AKT2/CASP9/CCND2/IL2/PIK3CD/CASP3/PIK3CA/IL2RG/CBLB/OAS3/BCL2/MSN/PIK3R1/IFNA2/RELA/IL12B/IL6/IRF9/HSPA1L/IKBKB/IL2RA/APAF1/NFKB1/MAPK8/STAT3/MAVS/IFNA8/MX2/EIF2S1/FAS/CASP8/TNFAIP3/CDK6/JUN/OAS1/CD3D/NFKBIA/IFIH1/IFNA1/TLR2/BAK1/FCGR2B/HSPA6/TLR7/IRF7
hsa04625	C-type lectin receptor signaling pathway	94	-0.363774	-1.55363	0.0061008	0.0061008	0.0129151	2499	tags=43%, list=21%, signal=34%	3558/5293/4046/5290/4893/5603/868/5295/5970/51561/3586/29108/22808/3593/3569/1960/10379/3551/1959/4790/5599/5336/64581/1263/114548/4775/26253/3659/3710/841/3725/4193/834/4792/6237/91860/2207/6850/5743/8915	IL2/PIK3CD/LSP1/PIK3CA/NRAS/MAPK13/CBLB/PIK3R1/RELA/IL23A/IL10/PYCARD/MRAS/IL12B/IL6/EGR3/IRF9/IKBKB/EGR2/NFKB1/MAPK8/PLCG2/CLEC7A/PLK3/NLRP3/NFATC3/CLEC4E/IRF1/ITPR3/CASP8/JUN/MDM2/CASP1/NFKBIA/RRAS/CALML4/FCER1G/SYK/PTGS2/BCL10
hsa04623	Cytosolic DNA-sensing pathway	51	-0.430339	-1.63189	0.00711238	0.00711238	0.0148912	2282	tags=33%, list=19%, signal=27%	3440/5970/29108/3569/3551/4790/57506/3445/6352/81030/834/4792/3439/3627/3606/3665/6351	IFNA2/RELA/PYCARD/IL6/IKBKB/NFKB1/MAVS/IFNA8/CCL5/ZBP1/CASP1/NFKBIA/IFNA1/CXCL10/IL18/IRF7/CCL4
hsa05030	Cocaine addiction	41	0.493452	1.65909	0.00760793	0.00760793	0.0157555	619	tags=20%, list=5%, signal=19%	1020/1644/8851/6571/7054/2778/2905/6531	CDK5/DDC/CDK5R1/SLC18A2/TH/GNAS/GRIN2C/SLC6A3
hsa00280	Valine, leucine and isoleucine degradation	41	0.492258	1.65508	0.00778485	0.00778485	0.0159486	2840	tags=54%, list=24%, signal=41%	549/3157/1738/39/5019/593/18/65985/27034/3712/5096/64087/38/224/5095/26275/217/3033/3032/586/56922/3030	AUH/HMGCS1/DLD/ACAT2/OXCT1/BCKDHA/ABAT/AACS/ACAD8/IVD/PCCB/MCCC2/ACAT1/ALDH3A2/PCCA/HIBCH/ALDH2/HADH/HADHB/BCAT1/MCCC1/HADHA
hsa05167	Kaposi sarcoma-associated herpesvirus infection	176	-0.298458	-1.4019	0.00960384	0.00960384	0.0194658	2467	tags=32%, list=21%, signal=26%	5293/836/5290/4893/5603/3105/5295/3440/5970/5335/3106/6233/285/3569/1437/100507436/2787/10379/3551/2920/4790/5599/5155/5336/6932/1026/6774/942/3445/2792/1232/4775/355/440738/7132/3710/1234/3459/841/1021/3725/5609/3576/4067/4792/3439/91860/1230/3055/4277/578/7098/6850/2919/3665/5743/9976	PIK3CD/CASP3/PIK3CA/NRAS/MAPK13/HLA-A/PIK3R1/IFNA2/RELA/PLCG1/HLA-B/RPS27A/ANGPT2/IL6/CSF2/MICA/GNG5/IRF9/IKBKB/CXCL2/NFKB1/MAPK8/PDGFB/PLCG2/TCF7/CDKN1A/STAT3/CD86/IFNA8/GNGT1/CCR3/NFATC3/FAS/MAP1LC3C/TNFRSF1A/ITPR3/CCR5/IFNGR1/CASP8/CDK6/JUN/MAP2K7/CXCL8/LYN/NFKBIA/IFNA1/CALML4/CCR1/HCK/MICB/BAK1/TLR3/SYK/CXCL1/IRF7/PTGS2/CLEC2B
hsa05323	Rheumatoid arthritis	79	-0.367417	-1.5288	0.009846	0.009846	0.01957	2372	tags=44%, list=20%, signal=36%	6364/4312/3112/3600/51561/7043/3569/1437/3113/8792/8992/4314/2920/6374/942/1435/6352/3108/3115/3119/3109/3605/3725/3576/10312/3126/3689/3683/6387/7097/5741/3606/2919/6347/3122	CCL20/MMP1/HLA-DOB/IL15/IL23A/TGFB3/IL6/CSF2/HLA-DPA1/TNFRSF11A/ATP6V0E1/MMP3/CXCL2/CXCL5/CD86/CSF1/CCL5/HLA-DMA/HLA-DPB1/HLA-DQB1/HLA-DMB/IL17A/JUN/CXCL8/TCIRG1/HLA-DRB4/ITGB2/ITGAL/CXCL12/TLR2/PTH/IL18/CXCL1/CCL2/HLA-DRA
hsa04950	Maturity onset diabetes of the young	22	-0.553049	-1.71825	0.00986066	0.00986066	0.01957	5158	tags=91%, list=44%, signal=51%	3172/5313/3170/50674/3280/3630/3087/3175/3174/3110/5078/6927/3375/6928/6514/4825/3651/5080/2494/4760	HNF4A/PKLR/FOXA2/NEUROG3/HES1/INS/HHEX/ONECUT1/HNF4G/MNX1/PAX4/HNF1A/IAPP/HNF1B/SLC2A2/NKX6-1/PDX1/PAX6/NR5A2/NEUROD1
hsa04926	Relaxin signaling pathway	114	0.376574	1.52023	0.011396	0.011396	0.0223839	1535	tags=25%, list=13%, signal=22%	5332/2785/1956/5601/107/6416/115/2778/5590/5291/1910/10681/8503/408/5602/2775/5594/10000/23236/2782/3265/5604/5595/3845/114/109/108/207/6654	PLCB4/GNG3/EGFR/MAPK9/ADCY1/MAP2K4/ADCY9/GNAS/PRKCZ/PIK3CB/EDNRB/GNB5/PIK3R3/ARRB1/MAPK10/GNAO1/MAPK1/AKT3/PLCB1/GNB1/HRAS/MAP2K1/MAPK3/KRAS/ADCY8/ADCY3/ADCY2/AKT1/SOS1
hsa04726	Serotonergic synapse	95	0.391889	1.53644	0.0120501	0.0120501	0.0234272	1164	tags=19%, list=10%, signal=17%	3358/5332/2785/1644/6571/3751/2778/8605/10681/2775/5594/3765/23236/2782/3265/5604/5595/3845	HTR2C/PLCB4/GNG3/DDC/SLC18A2/KCND2/GNAS/PLA2G4C/GNB5/GNAO1/MAPK1/KCNJ9/PLCB1/GNB1/HRAS/MAP2K1/MAPK3/KRAS
hsa04962	Vasopressin-regulated water reabsorption	39	0.487412	1.62226	0.0124356	0.0124356	0.0239324	1261	tags=31%, list=11%, signal=28%	1780/398/361/115/1778/2778/10540/6844/51164/51143/1639/109	DYNC1I1/ARHGDIG/AQP4/ADCY9/DYNC1H1/GNAS/DCTN2/VAMP2/DCTN4/DYNC1LI1/DCTN1/ADCY3
hsa00520	Amino sugar and nucleotide sugar metabolism	40	0.482668	1.61496	0.0125887	0.0125887	0.0239847	878	tags=22%, list=7%, signal=21%	3098/5236/2821/55907/2592/4351/51700/54187/7360	HK1/PGM1/GPI/CMAS/GALT/MPI/CYB5R2/NANS/UGP2
hsa00630	Glyoxylate and dicarboxylate metabolism	22	0.582757	1.7012	0.0129286	0.0129286	0.0243885	2690	tags=55%, list=23%, signal=42%	4190/50/1738/1431/4191/48/39/5096/283871/38/5095/9380	MDH1/ACO2/DLD/CS/MDH2/ACO1/ACAT2/PCCB/PGP/ACAT1/PCCA/GRHPR
hsa04662	B cell receptor signaling pathway	76	-0.360955	-1.48802	0.0143108	0.0143108	0.0266583	2467	tags=42%, list=21%, signal=34%	5293/5290/4893/5295/5970/11024/29760/971/10990/353514/3551/10288/4790/5777/5336/7409/27071/4775/23547/10859/11006/3725/4067/930/4792/5880/8519/11027/11025/2213/6850/8915	PIK3CD/PIK3CA/NRAS/PIK3R1/RELA/LILRA1/BLNK/CD72/LILRB5/LILRA5/IKBKB/LILRB2/NFKB1/PTPN6/PLCG2/VAV1/DAPP1/NFATC3/LILRA4/LILRB1/LILRB4/JUN/LYN/CD19/NFKBIA/RAC2/IFITM1/LILRA2/LILRB3/FCGR2B/SYK/BCL10
hsa04742	Taste transduction	60	0.430587	1.56021	0.0144117	0.0144117	0.0266583	1276	tags=17%, list=11%, signal=15%	9568/5332/2911/2554/2550/6328/2558/23236/114/10021	GABBR2/PLCB4/GRM1/GABRA1/GABBR1/SCN3A/GABRA5/PLCB1/ADCY8/HCN4
hsa04658	Th1 and Th2 cell differentiation	83	-0.346788	-1.45526	0.0159711	0.0159711	0.0292589	2499	tags=40%, list=21%, signal=32%	3558/3561/5603/6778/5970/5335/3112/11317/3932/3593/3113/3551/3559/919/920/4790/5599/3460/3566/3108/4775/3595/3115/3119/3109/3459/864/3725/915/4792/3126/4094/3122	IL2/IL2RG/MAPK13/STAT6/RELA/PLCG1/HLA-DOB/RBPJL/LCK/IL12B/HLA-DPA1/IKBKB/IL2RA/CD247/CD4/NFKB1/MAPK8/IFNGR2/IL4R/HLA-DMA/NFATC3/IL12RB2/HLA-DPB1/HLA-DQB1/HLA-DMB/IFNGR1/RUNX3/JUN/CD3D/NFKBIA/HLA-DRB4/MAF/HLA-DRA
hsa04921	Oxytocin signaling pathway	126	0.35952	1.47281	0.0163551	0.0163551	0.0295871	1447	tags=25%, list=12%, signal=22%	5332/816/1956/818/107/9254/115/55799/2778/5532/8605/6262/5530/2775/5594/6263/784/3761/3765/23236/3265/5604/5595/6261/3845/782/114/109/3763/108/5571	PLCB4/CAMK2B/EGFR/CAMK2G/ADCY1/CACNA2D2/ADCY9/CACNA2D3/GNAS/PPP3CB/PLA2G4C/RYR2/PPP3CA/GNAO1/MAPK1/RYR3/CACNB3/KCNJ4/KCNJ9/PLCB1/HRAS/MAP2K1/MAPK3/RYR1/KRAS/CACNB1/ADCY8/ADCY3/KCNJ6/ADCY2/PRKAG1
hsa00062	Fatty acid elongation	14	0.643266	1.66462	0.0164609	0.0164609	0.0295871	2840	tags=57%, list=24%, signal=43%	11332/6785/9524/51144/5538/3033/3032/3030	ACOT7/ELOVL4/TECR/HSD17B12/PPT1/HADH/HADHB/HADHA
hsa04910	Insulin signaling pathway	124	0.35745	1.46091	0.0181335	0.0181335	0.0320631	2612	tags=34%, list=22%, signal=27%	5575/10891/5601/3098/2194/5837/6720/5590/5291/31/8503/5602/7249/5594/10000/6009/3632/3265/5604/5595/5577/3845/3667/207/5571/23265/6654/801/2997/51422/5834/5605/92579/5509/23433/8569/2475/5573/5792/2002/10211/572	PRKAR1B/PPARGC1A/MAPK9/HK1/FASN/PYGM/SREBF1/PRKCZ/PIK3CB/ACACA/PIK3R3/MAPK10/TSC2/MAPK1/AKT3/RHEB/INPP5A/HRAS/MAP2K1/MAPK3/PRKAR2B/KRAS/IRS1/AKT1/PRKAG1/EXOC7/SOS1/CALM1/GYS1/PRKAG2/PYGB/MAP2K2/G6PC3/PPP1R3D/RHOQ/MKNK1/MTOR/PRKAR1A/PTPRF/ELK1/FLOT1/BAD
hsa04966	Collecting duct acid secretion	22	0.561795	1.64001	0.018175	0.018175	0.0320631	1642	tags=45%, list=14%, signal=39%	526/534/523/155066/527/535/9114/9550/51382/529	ATP6V1B2/ATP6V1G2/ATP6V1A/ATP6V0E2/ATP6V0C/ATP6V0A1/ATP6V0D1/ATP6V1G1/ATP6V1D/ATP6V1E1
hsa05034	Alcoholism	86	0.388164	1.49619	0.0183591	0.0183591	0.0320698	1274	tags=20%, list=11%, signal=18%	2785/1644/6571/7054/2778/10681/2905/2775/6531/5594/4915/2782/3265/5604/5595/3845/10014	GNG3/DDC/SLC18A2/TH/GNAS/GNB5/GRIN2C/GNAO1/SLC6A3/MAPK1/NTRK2/GNB1/HRAS/MAP2K1/MAPK3/KRAS/HDAC5
hsa04912	GnRH signaling pathway	80	0.394544	1.50002	0.0185155	0.0185155	0.0320698	1535	tags=26%, list=13%, signal=23%	5332/816/1956/818/5601/107/6416/115/2778/8605/5602/5594/23236/3265/5604/5595/3845/114/109/108/6654	PLCB4/CAMK2B/EGFR/CAMK2G/MAPK9/ADCY1/MAP2K4/ADCY9/GNAS/PLA2G4C/MAPK10/MAPK1/PLCB1/HRAS/MAP2K1/MAPK3/KRAS/ADCY8/ADCY3/ADCY2/SOS1
hsa04371	Apelin signaling pathway	117	0.361835	1.46792	0.0198051	0.0198051	0.0339945	1447	tags=26%, list=12%, signal=23%	5332/2785/10891/107/115/6262/10681/5594/30849/10000/6263/10672/185/81631/23236/2782/3265/5604/56848/5595/6261/3845/6543/114/109/10014/8678/108/207/5571	PLCB4/GNG3/PPARGC1A/ADCY1/ADCY9/RYR2/GNB5/MAPK1/PIK3R4/AKT3/RYR3/GNA13/AGTR1/MAP1LC3B/PLCB1/GNB1/HRAS/MAP2K1/SPHK2/MAPK3/RYR1/KRAS/SLC8A2/ADCY8/ADCY3/HDAC5/BECN1/ADCY2/AKT1/PRKAG1
hsa04925	Aldosterone synthesis and secretion	83	0.388282	1.48685	0.0202614	0.0202614	0.0344673	1834	tags=29%, list=16%, signal=25%	5332/491/816/818/107/115/2778/183/185/483/23236/493/476/477/114/109/8911/3777/108/5587/481/801/4929/8536	PLCB4/ATP2B2/CAMK2B/CAMK2G/ADCY1/ADCY9/GNAS/AGT/AGTR1/ATP1B3/PLCB1/ATP2B4/ATP1A1/ATP1A2/ADCY8/ADCY3/CACNA1I/KCNK3/ADCY2/PRKD1/ATP1B1/CALM1/NR4A2/CAMK1
hsa04140	Autophagy - animal	121	0.356087	1.45101	0.020549	0.020549	0.0346472	2612	tags=39%, list=22%, signal=31%	5601/23710/1612/9110/5291/8503/5602/7249/5594/30849/10000/6009/8408/81631/10670/1509/5515/3265/5604/664/26100/5595/3845/55255/3667/23192/8678/207/9451/79065/5588/9821/29982/5605/3708/64419/23130/64223/7405/6794/2475/7879/8897/10533/5861/598/572	MAPK9/GABARAPL1/DAPK1/MTMR4/PIK3CB/PIK3R3/MAPK10/TSC2/MAPK1/PIK3R4/AKT3/RHEB/ULK1/MAP1LC3B/RRAGA/CTSD/PPP2CA/HRAS/MAP2K1/BNIP3/WIPI2/MAPK3/KRAS/WDR41/IRS1/ATG4B/BECN1/AKT1/EIF2AK3/ATG9A/PRKCQ/RB1CC1/NRBF2/MAP2K2/ITPR1/MTMR14/ATG2A/MLST8/UVRAG/STK11/MTOR/RAB7A/MTMR3/ATG7/RAB1A/BCL2L1/BAD
hsa00230	Purine metabolism	96	0.374496	1.47146	0.0218123	0.0218123	0.0364546	1795	tags=24%, list=15%, signal=20%	3251/956/5141/107/115/5236/9583/4830/5631/271/132/471/2272/2766/10606/114/109/203/108/51292/272/5152/22875	HPRT1/ENTPD3/PDE4A/ADCY1/ADCY9/PGM1/ENTPD4/NME1/PRPS1/AMPD2/ADK/ATIC/FHIT/GMPR/PAICS/ADCY8/ADCY3/AK1/ADCY2/GMPR2/AMPD3/PDE9A/ENPP4
hsa00830	Retinol metabolism	38	-0.431182	-1.53204	0.0227064	0.0227064	0.0376189	3087	tags=45%, list=26%, signal=33%	1592/50700/1562/1555/9249/7363/124/1558/1576/220/131/7366/1577/125/79799/126/7367	CYP26A1/RDH8/CYP2C18/CYP2B6/DHRS3/UGT2B4/ADH1A/CYP2C8/CYP3A4/ALDH1A3/ADH7/UGT2B15/CYP3A5/ADH1B/UGT2A3/ADH1C/UGT2B17
hsa04915	Estrogen signaling pathway	117	0.356508	1.44631	0.024049	0.024049	0.0394998	1700	tags=25%, list=14%, signal=21%	9568/5332/2911/1956/2550/107/115/2778/5291/8503/2775/5594/10000/3765/1509/23236/3265/5604/5595/3845/114/109/3763/108/207/2289/6654/3875/801	GABBR2/PLCB4/GRM1/EGFR/GABBR1/ADCY1/ADCY9/GNAS/PIK3CB/PIK3R3/GNAO1/MAPK1/AKT3/KCNJ9/CTSD/PLCB1/HRAS/MAP2K1/MAPK3/KRAS/ADCY8/ADCY3/KCNJ6/ADCY2/AKT1/FKBP5/SOS1/KRT18/CALM1
hsa04914	Progesterone-mediated oocyte maturation	76	0.387995	1.46394	0.0245888	0.0245888	0.0400411	1892	tags=30%, list=16%, signal=26%	5601/107/115/5291/8503/5602/5594/10000/8379/6197/22849/5604/5595/3845/114/109/108/207/8900/891/25847/29882/996	MAPK9/ADCY1/ADCY9/PIK3CB/PIK3R3/MAPK10/MAPK1/AKT3/MAD1L1/RPS6KA3/CPEB3/MAP2K1/MAPK3/KRAS/ADCY8/ADCY3/ADCY2/AKT1/CCNA1/CCNB1/ANAPC13/ANAPC2/CDC27
hsa04936	Alcoholic liver disease	128	-0.306562	-1.37231	0.025007	0.025007	0.0403583	2493	tags=31%, list=21%, signal=25%	929/2168/124/836/5603/51/3440/5970/5465/79602/3593/3569/3551/2920/4790/131/5599/2309/6932/5562/3445/355/7132/3605/125/719/841/5609/3576/126/4792/23765/3439/712/713/2919/29896/79966/728/23643	CD14/FABP1/ADH1A/CASP3/MAPK13/ACOX1/IFNA2/RELA/PPARA/ADIPOR2/IL12B/IL6/IKBKB/CXCL2/NFKB1/ADH7/MAPK8/FOXO3/TCF7/PRKAA1/IFNA8/FAS/TNFRSF1A/IL17A/ADH1B/C3AR1/CASP8/MAP2K7/CXCL8/ADH1C/NFKBIA/IL17RA/IFNA1/C1QA/C1QB/CXCL1/TRA2A/SCD5/C5AR1/LY96
hsa04971	Gastric acid secretion	63	0.407683	1.49011	0.0252072	0.0252072	0.0403583	1700	tags=32%, list=14%, signal=27%	5332/6750/816/818/107/115/2778/7430/3766/483/23236/3773/476/477/114/109/108/481/1131/801	PLCB4/SST/CAMK2B/CAMK2G/ADCY1/ADCY9/GNAS/EZR/KCNJ10/ATP1B3/PLCB1/KCNJ16/ATP1A1/ATP1A2/ADCY8/ADCY3/ADCY2/ATP1B1/CHRM3/CALM1
hsa04514	Cell adhesion molecules	122	-0.306958	-1.36408	0.0277008	0.0277008	0.0439811	3225	tags=43%, list=27%, signal=32%	3111/29851/80380/5802/58494/941/3133/1493/4756/999/3696/3135/3105/10686/1462/1364/3112/3655/3106/9076/5133/1013/1365/3113/3688/920/5789/1366/1003/3695/3384/5175/942/3108/3115/3119/3676/3109/7412/6402/10666/6614/23562/50848/3684/3126/100506658/3689/3683/6401/5788/3122/24146	HLA-DOA/ICOS/PDCD1LG2/PTPRS/JAM2/CD80/HLA-E/CTLA4/NEO1/CDH1/ITGB8/HLA-G/HLA-A/CLDN16/VCAN/CLDN4/HLA-DOB/ITGA6/HLA-B/CLDN1/PDCD1/CDH15/CLDN3/HLA-DPA1/ITGB1/CD4/PTPRD/CLDN7/CDH5/ITGB7/ICAM2/PECAM1/CD86/HLA-DMA/HLA-DPB1/HLA-DQB1/ITGA4/HLA-DMB/VCAM1/SELL/CD226/SIGLEC1/CLDN14/F11R/ITGAM/HLA-DRB4/OCLN/ITGB2/ITGAL/SELE/PTPRC/HLA-DRA/CLDN15
hsa04613	Neutrophil extracellular trap formation	103	-0.319077	-1.38354	0.0294985	0.0294985	0.0464483	2467	tags=36%, list=21%, signal=29%	5293/5290/23569/2244/5603/51564/366/79792/5295/5970/5335/27180/3690/3065/2358/653361/1184/4790/5336/64581/837/1535/83447/834/4689/3684/2357/5880/3689/3683/1536/7097/6850/51284/2215/2212/728	PIK3CD/PIK3CA/PADI4/FGB/MAPK13/HDAC7/AQP9/GSDMD/PIK3R1/RELA/PLCG1/SIGLEC9/ITGB3/HDAC1/FPR2/NCF1/CLCN5/NFKB1/PLCG2/CLEC7A/CASP4/CYBA/SLC25A31/CASP1/NCF4/ITGAM/FPR1/RAC2/ITGB2/ITGAL/CYBB/TLR2/SYK/TLR7/FCGR3B/FCGR2A/C5AR1
hsa04142	Lysosome	114	0.351195	1.41778	0.0307059	0.0307059	0.0479532	1792	tags=27%, list=15%, signal=23%	8120/23312/51606/1213/9583/138050/23335/23457/1212/8905/527/535/9114/57192/10947/1509/4758/8943/950/55353/6609/4669/537/4891/3423/533/175/8218/23659/5476/6448	AP3B2/DMXL2/ATP6V1H/CLTC/ENTPD4/HGSNAT/WDR7/ABCB9/CLTB/AP1S2/ATP6V0C/ATP6V0A1/ATP6V0D1/MCOLN1/AP3M2/CTSD/NEU1/AP3D1/SCARB2/LAPTM4B/SMPD1/NAGLU/ATP6AP1/SLC11A2/IDS/ATP6V0B/AGA/CLTCL1/PLA2G15/CTSA/SGSH
hsa04024	cAMP signaling pathway	189	0.311288	1.35102	0.0315774	0.0315774	0.0489132	1443	tags=19%, list=12%, signal=17%	9568/2890/491/6750/5141/816/7432/818/5601/2550/107/115/10451/2778/116/6262/5291/8503/2905/5602/5594/10000/483/610/5604/5595/493/476/477/488/114/109/10021/5727/108/207	GABBR2/GRIA1/ATP2B2/SST/PDE4A/CAMK2B/VIP/CAMK2G/MAPK9/GABBR1/ADCY1/ADCY9/VAV3/GNAS/ADCYAP1/RYR2/PIK3CB/PIK3R3/GRIN2C/MAPK10/MAPK1/AKT3/ATP1B3/HCN2/MAP2K1/MAPK3/ATP2B4/ATP1A1/ATP1A2/ATP2A2/ADCY8/ADCY3/HCN4/PTCH1/ADCY2/AKT1
hsa01232	Nucleotide metabolism	58	0.405699	1.46274	0.0333333	0.0333333	0.0512168	2304	tags=31%, list=20%, signal=25%	3251/956/9583/4830/8623/271/132/2766/203/79077/51292/272/1503/1635/51727/955/1841/158	HPRT1/ENTPD3/ENTPD4/NME1/ASMTL/AMPD2/ADK/GMPR/AK1/DCTPP1/GMPR2/AMPD3/CTPS1/DCTD/CMPK1/ENTPD6/DTYMK/ADSL
hsa00410	beta-Alanine metabolism	28	0.496484	1.53749	0.0354649	0.0354649	0.054056	6	tags=7%, list=0%, signal=7%	2571/2572	GAD1/GAD2
hsa04750	Inflammatory mediator regulation of TRP channels	82	0.369619	1.4114	0.0358435	0.0358435	0.0541994	1398	tags=21%, list=12%, signal=18%	3358/5332/816/818/5601/107/115/2778/8605/5291/8503/5602/41/23236/114/109/108	HTR2C/PLCB4/CAMK2B/CAMK2G/MAPK9/ADCY1/ADCY9/GNAS/PLA2G4C/PIK3CB/PIK3R3/MAPK10/ASIC1/PLCB1/ADCY8/ADCY3/ADCY2
hsa05146	Amoebiasis	100	-0.314244	-1.3566	0.0379679	0.0379679	0.0569597	3216	tags=47%, list=27%, signal=34%	9630/5296/7042/733/910/3918/3911/2769/735/1286/22798/1511/929/5293/836/5290/6317/5295/5970/911/3554/3586/81/7043/3593/3569/1437/3915/5275/1281/2920/1287/4790/5273/1282/7414/1285/3912/3576/5568/912/3684/3689/7097/2919/3315/7850	GNA14/PIK3R2/TGFB2/C8G/CD1B/LAMC2/LAMA5/GNA15/C9/COL4A4/LAMB4/CTSG/CD14/PIK3CD/CASP3/PIK3CA/SERPINB3/PIK3R1/RELA/CD1C/IL1R1/IL10/ACTN4/TGFB3/IL12B/IL6/CSF2/LAMC1/SERPINB13/COL3A1/CXCL2/COL4A5/NFKB1/SERPINB10/COL4A1/VCL/COL4A3/LAMB1/CXCL8/PRKACG/CD1D/ITGAM/ITGB2/TLR2/CXCL1/HSPB1/IL1R2
hsa05135	Yersinia infection	125	-0.296796	-1.32514	0.0397443	0.0397443	0.0591589	2499	tags=33%, list=21%, signal=26%	3558/5293/5290/5603/5295/5970/5335/10163/10458/3932/6195/3586/29108/3569/3688/3551/920/5829/4790/5599/8935/7409/114548/4775/3678/3676/10109/7456/3725/5609/3576/3937/834/4792/6093/5880/7454/10095/3606/6347/2212	IL2/PIK3CD/PIK3CA/MAPK13/PIK3R1/RELA/PLCG1/WASF2/BAIAP2/LCK/RPS6KA1/IL10/PYCARD/IL6/ITGB1/IKBKB/CD4/PXN/NFKB1/MAPK8/SKAP2/VAV1/NLRP3/NFATC3/ITGA5/ITGA4/ARPC2/WIPF1/JUN/MAP2K7/CXCL8/LCP2/CASP1/NFKBIA/ROCK1/RAC2/WAS/ARPC1B/IL18/CCL2/FCGR2A
hsa04620	Toll-like receptor signaling pathway	93	-0.315799	-1.34676	0.0421192	0.0421192	0.0622079	2493	tags=33%, list=21%, signal=26%	929/5293/5290/5603/5295/3440/5970/3593/3569/3551/6373/4790/5599/942/3445/6352/841/3725/5609/3576/4792/3439/3627/7097/1326/7098/7100/51284/3665/6351/23643	CD14/PIK3CD/PIK3CA/MAPK13/PIK3R1/IFNA2/RELA/IL12B/IL6/IKBKB/CXCL11/NFKB1/MAPK8/CD86/IFNA8/CCL5/CASP8/JUN/MAP2K7/CXCL8/NFKBIA/IFNA1/CXCL10/TLR2/MAP3K8/TLR3/TLR5/TLR7/IRF7/CCL4/LY96
hsa05213	Endometrial cancer	55	0.401771	1.43484	0.0449342	0.0449342	0.065855	2005	tags=35%, list=17%, signal=29%	10912/1956/5291/8503/5594/10000/1496/3265/5604/10297/5595/3845/324/1647/207/6654/83439/5605/4292	GADD45G/EGFR/PIK3CB/PIK3R3/MAPK1/AKT3/CTNNA2/HRAS/MAP2K1/APC2/MAPK3/KRAS/APC/GADD45A/AKT1/SOS1/TCF7L1/MAP2K2/MLH1
hsa04066	HIF-1 signaling pathway	102	0.345171	1.36965	0.0464856	0.0464856	0.0676087	1286	tags=22%, list=11%, signal=19%	2026/5214/816/1956/5213/818/3098/230/5291/8503/3945/226/2023/5594/10000/8453/5230/5604/5595/5160/5162/3939	ENO2/PFKP/CAMK2B/EGFR/PFKM/CAMK2G/HK1/ALDOC/PIK3CB/PIK3R3/LDHB/ALDOA/ENO1/MAPK1/AKT3/CUL2/PGK1/MAP2K1/MAPK3/PDHA1/PDHB/LDHA
hsa04530	Tight junction	139	-0.284199	-1.29092	0.046915	0.046915	0.0677162	2449	tags=31%, list=21%, signal=25%	4637/154796/5906/10686/4478/23513/1364/9076/911/93643/9181/81/1740/1365/10627/3688/1366/5519/3059/4734/5599/5562/84612/4214/11346/10398/5872/79861/10109/51735/1080/3725/5609/5568/23562/912/50848/6093/100506658/7454/10095/8531/24146	MYL6/AMOT/RAP1A/CLDN16/MSN/SCRIB/CLDN4/CLDN1/CD1C/TJAP1/ARHGEF2/ACTN4/DLG2/CLDN3/MYL12A/ITGB1/CLDN7/PPP2R1B/HCLS1/NEDD4/MAPK8/PRKAA1/PARD6B/MAP3K1/SYNPO/MYL9/RAB13/TUBAL3/ARPC2/RAPGEF6/CFTR/JUN/MAP2K7/PRKACG/CLDN14/CD1D/F11R/ROCK1/OCLN/WAS/ARPC1B/YBX3/CLDN15
hsa04916	Melanogenesis	86	0.357186	1.37679	0.0485784	0.0485784	0.0695061	1398	tags=22%, list=12%, signal=20%	5332/816/3815/818/107/115/2778/1910/2775/5594/23236/3265/5604/5595/3845/114/109/7472/108	PLCB4/CAMK2B/KIT/CAMK2G/ADCY1/ADCY9/GNAS/EDNRB/GNAO1/MAPK1/PLCB1/HRAS/MAP2K1/MAPK3/KRAS/ADCY8/ADCY3/WNT2/ADCY2
hsa04935	Growth hormone synthesis, secretion and action	109	0.339954	1.36554	0.0488847	0.0488847	0.0695061	1535	tags=22%, list=13%, signal=19%	5332/6750/5601/107/6416/115/2778/5291/8503/5602/5594/10000/3486/23236/3265/5604/5595/3845/114/109/3667/108/207/6654	PLCB4/SST/MAPK9/ADCY1/MAP2K4/ADCY9/GNAS/PIK3CB/PIK3R3/MAPK10/MAPK1/AKT3/IGFBP3/PLCB1/HRAS/MAP2K1/MAPK3/KRAS/ADCY8/ADCY3/IRS1/ADCY2/AKT1/SOS1
hsa04150	mTOR signaling pathway	126	0.329843	1.35123	0.0495327	0.0495327	0.0699058	1642	tags=23%, list=14%, signal=20%	526/534/523/51606/23175/5291/8503/7249/5594/10000/6009/81929/6197/8408/10670/3265/5604/10641/55615/5595/3845/3667/9550/7472/207/51382/6654/8649/529	ATP6V1B2/ATP6V1G2/ATP6V1A/ATP6V1H/LPIN1/PIK3CB/PIK3R3/TSC2/MAPK1/AKT3/RHEB/SEH1L/RPS6KA3/ULK1/RRAGA/HRAS/MAP2K1/NPRL2/PRR5/MAPK3/KRAS/IRS1/ATP6V1G1/WNT2/AKT1/ATP6V1D/SOS1/LAMTOR3/ATP6V1E1

## Sheet: NEFL
Supplementary Table S5 |Gene Set Enrichment Analyses identification of NEFL-related signaling pathways
ID	Description	setSize	enrichmentScore	NES	pvalue	p.adjust	qvalues	rank	leading_edge	core_enrichment	gene_name
hsa05012	Parkinson disease	199	0.546835	2.3087	0.000130753	0.000130753	0.00158173	2873	tags=63%, list=24%, signal=48%	7345/7280/5601/7384/7277/7054/2774/816/6571/3831/10381/291/4706/4698/9377/5718/2778/6389/64837/4719/818/1537/4729/6622/7416/5709/23516/54205/5602/10383/6531/10105/1345/5714/10131/4723/4714/4717/7386/292/7419/7317/4694/4722/1349/203068/5682/9451/1351/5708/4705/9861/4704/1337/5707/4702/4712/5705/1327/4707/27429/374291/27089/4724/4697/4891/4700/4701/5706/5694/4696/6647/7417/5689/5695/5684/10213/5685…	UCHL1/TUBB2A/MAPK9/UQCRC1/TUBA4A/TH/GNAL/CAMK2B/SLC18A2/KLC1/TUBB3/SLC25A4/NDUFAB1/NDUFA5/COX5A/PSMD12/GNAS/SDHA/KLC2/NDUFS1/CAMK2G/CYC1/NDUFV2/SNCA/VDAC1/PSMD3/SLC39A14/CYCS/MAPK10/TUBB4B/SLC6A3/PPIF/COX6C/PSMD8/TRAP1/NDUFV1/NDUFB8/NDUFC1/UQCRFS1/SLC25A5/VDAC3/UBA1/NDUFA1/NDUFS3/COX7B/TUBB/PSMA1/EIF2AK3/COX8A/PSMD2/NDUFA10/PSMD6/NDUFA9/COX6A1/PSMD1/NDUFA8/NDUFB6/PSMC5/COX4I1/NDUFB1/HTRA2/NDUFS7/…
hsa05208	Chemical carcinogenesis - reactive oxygen species	171	0.514188	2.12994	0.000134318	0.000134318	0.00158173	2063	tags=46%, list=18%, signal=38%	5601/7384/1645/6416/291/4706/8503/4698/9377/5291/6389/4259/1956/4719/1537/4729/7416/2053/2952/3845/5594/10000/5602/5604/2944/2947/10105/1345/4723/4714/2946/4717/2052/7386/292/7419/2941/4694/52/4722/1349/1147/1351/4705/4704/1337/4702/4712/1327/4707/3265/374291/27089/4724/4697/6654/4700/572/4701/4696/6647/5595/7417/5587/4720/1329/207/1347/7381/4726/9446/1836/54539/4708/1340/293/4713/7385	MAPK9/UQCRC1/AKR1C1/MAP2K4/SLC25A4/NDUFAB1/PIK3R3/NDUFA5/COX5A/PIK3CB/SDHA/MGST3/EGFR/NDUFS1/CYC1/NDUFV2/VDAC1/EPHX2/GSTT1/KRAS/MAPK1/AKT3/MAPK10/MAP2K1/GSTM1/GSTM3/PPIF/COX6C/NDUFV1/NDUFB8/GSTM2/NDUFC1/EPHX1/UQCRFS1/SLC25A5/VDAC3/GSTA4/NDUFA1/ACP1/NDUFS3/COX7B/CHUK/COX8A/NDUFA10/NDUFA9/COX6A1/NDUFA8/NDUFB6/COX4I1/NDUFB1/HRAS/NDUFS7/UQCRQ/NDUFS4/NDUFA4/SOS1/NDUFA6/BAD/NDUFA7/NDUFA3/SOD1/MAPK3/VDA…
hsa04714	Thermogenesis	164	0.46678	1.92473	0.000134898	0.000134898	0.00158173	2063	tags=40%, list=18%, signal=34%	7384/115/10891/6597/51412/1353/1268/4706/107/4698/9377/2778/6389/4719/1537/4729/6604/3845/29078/6197/1345/4723/4714/4717/6009/2182/7249/7386/4694/109/4722/1349/1351/4705/4704/1337/4702/4712/51103/1327/4707/3265/374291/27089/4724/4697/23305/6654/4700/4701/4696/108/4720/1329/1347/7381/51422/4726/5571/54539/114/2181/4708/1340/4713/7385	UQCRC1/ADCY9/PPARGC1A/SMARCA4/ACTL6B/COX11/CNR1/NDUFAB1/ADCY1/NDUFA5/COX5A/GNAS/SDHA/NDUFS1/CYC1/NDUFV2/SMARCD3/KRAS/NDUFAF4/RPS6KA3/COX6C/NDUFV1/NDUFB8/NDUFC1/RHEB/ACSL4/TSC2/UQCRFS1/NDUFA1/ADCY3/NDUFS3/COX7B/COX8A/NDUFA10/NDUFA9/COX6A1/NDUFA8/NDUFB6/NDUFAF1/COX4I1/NDUFB1/HRAS/NDUFS7/UQCRQ/NDUFS4/NDUFA4/ACSL6/SOS1/NDUFA6/NDUFA7/NDUFA3/ADCY2/NDUFS2/COX5B/COX7A2/UQCRB/PRKAG2/NDUFS6/PRKAG1/NDUFB11/…
hsa05415	Diabetic cardiomyopathy	159	0.517705	2.12504	0.000136073	0.000136073	0.00158173	2063	tags=46%, list=18%, signal=38%	5332/5601/7384/816/291/4706/8503/4698/9377/5291/6389/5590/6262/4719/818/1537/4729/185/7416/10000/5602/10105/1345/4723/4714/5164/4717/3667/7386/292/7419/488/489/4694/23236/4722/1349/183/5162/1351/4705/5166/4704/1337/4702/4712/1327/4707/374291/27089/4724/5160/4697/4700/4701/1509/4696/7417/4720/1329/207/1347/7381/4726/2936/4087/54539/4708/1340/25874/293/4713/7385	PLCB4/MAPK9/UQCRC1/CAMK2B/SLC25A4/NDUFAB1/PIK3R3/NDUFA5/COX5A/PIK3CB/SDHA/PRKCZ/RYR2/NDUFS1/CAMK2G/CYC1/NDUFV2/AGTR1/VDAC1/AKT3/MAPK10/PPIF/COX6C/NDUFV1/NDUFB8/PDK2/NDUFC1/IRS1/UQCRFS1/SLC25A5/VDAC3/ATP2A2/ATP2A3/NDUFA1/PLCB1/NDUFS3/COX7B/AGT/PDHB/COX8A/NDUFA10/PDK4/NDUFA9/COX6A1/NDUFA8/NDUFB6/COX4I1/NDUFB1/NDUFS7/UQCRQ/NDUFS4/PDHA1/NDUFA4/NDUFA6/NDUFA7/CTSD/NDUFA3/VDAC2/NDUFS2/COX5B/AKT1/COX7A2/…
hsa05017	Spinocerebellar ataxia	130	0.568798	2.27711	0.000140233	0.000140233	0.00158173	2203	tags=46%, list=19%, signal=38%	5332/2911/2890/5601/291/3752/8503/5718/5291/6712/4976/10939/7416/5709/10000/54205/5602/30849/10105/5714/292/7419/488/489/9519/23236/29982/25814/9821/8408/5682/5708/9861/5707/8678/5705/2905/5706/5694/7436/2959/26100/7417/5689/5695/5684/10213/5685/207/5649/5710/23369/2259/293/3708/5713/5693/5700/5717/6261	PLCB4/GRM1/GRIA1/MAPK9/SLC25A4/KCND3/PIK3R3/PSMD12/PIK3CB/SPTBN2/OPA1/AFG3L2/VDAC1/PSMD3/AKT3/CYCS/MAPK10/PIK3R4/PPIF/PSMD8/SLC25A5/VDAC3/ATP2A2/ATP2A3/TBPL1/PLCB1/NRBF2/ATXN10/RB1CC1/ULK1/PSMA1/PSMD2/PSMD6/PSMD1/BECN1/PSMC5/GRIN2C/PSMC6/PSMB6/VLDLR/GTF2B/WIPI2/VDAC2/PSMB1/PSMB7/PSMA3/PSMD14/PSMA4/AKT1/RELN/PSMD4/PUM2/FGF14/SLC25A6/ITPR1/PSMD7/PSMB5/PSMC1/PSMD11/RYR1
hsa04723	Retrograde endocannabinoid signaling	118	0.558106	2.20303	0.000142167	0.000142167	0.00158173	2095	tags=43%, list=18%, signal=36%	57084/5332/2911/2554/2890/2785/5601/115/2566/1268/4706/107/4698/4719/4729/10681/5594/3763/5602/2558/2775/4723/3765/4714/2915/4717/4694/109/23236/4722/2782/4705/4704/4702/4712/4707/374291/4724/4697/4700/4701/4696/5595/108/4720/4726/54539/114/4708/4713/3708	SLC17A6/PLCB4/GRM1/GABRA1/GRIA1/GNG3/MAPK9/ADCY9/GABRG2/CNR1/NDUFAB1/ADCY1/NDUFA5/NDUFS1/NDUFV2/GNB5/MAPK1/KCNJ6/MAPK10/GABRA5/GNAO1/NDUFV1/KCNJ9/NDUFB8/GRM5/NDUFC1/NDUFA1/ADCY3/PLCB1/NDUFS3/GNB1/NDUFA10/NDUFA9/NDUFA8/NDUFB6/NDUFB1/NDUFS7/NDUFS4/NDUFA4/NDUFA6/NDUFA7/NDUFA3/MAPK3/ADCY2/NDUFS2/NDUFS6/NDUFB11/ADCY8/NDUFB2/NDUFB7/ITPR1
hsa04728	Dopaminergic synapse	115	0.530157	2.08628	0.00014243	0.00014243	0.00158173	1207	tags=25%, list=10%, signal=23%	50632/5332/6323/2890/1644/2785/5601/7054/2774/816/6571/2778/5530/5532/818/5527/10681/5515/10000/3763/5602/6531/2775/408/3765/5518/23236/55012/2782	CALY/PLCB4/SCN1A/GRIA1/DDC/GNG3/MAPK9/TH/GNAL/CAMK2B/SLC18A2/GNAS/PPP3CA/PPP3CB/CAMK2G/PPP2R5C/GNB5/PPP2CA/AKT3/KCNJ6/MAPK10/SLC6A3/GNAO1/ARRB1/KCNJ9/PPP2R1A/PLCB1/PPP2R3C/GNB1
hsa01200	Carbon metabolism	100	0.560864	2.16158	0.000144844	0.000144844	0.00158173	1292	tags=35%, list=11%, signal=31%	55753/2805/4190/5214/2026/5213/8803/3098/5315/10993/6389/2821/10873/50/1738/4199/3419/5631/2806/5230/1431/2023/230/3421/5223/48/1737/7167/4191/3420/39/226/7086/5162/2271	OGDHL/GOT1/MDH1/PFKP/ENO2/PFKM/SUCLA2/HK1/PKM/SDS/SDHA/GPI/ME3/ACO2/DLD/ME1/IDH3A/PRPS1/GOT2/PGK1/CS/ENO1/ALDOC/IDH3G/PGAM1/ACO1/DLAT/TPI1/MDH2/IDH3B/ACAT2/ALDOA/TKT/PDHB/FH
hsa04724	Glutamatergic synapse	94	0.548118	2.09174	0.000145943	0.000145943	0.00158173	1042	tags=24%, list=9%, signal=22%	57084/5332/2911/2744/2890/2785/27165/115/107/2778/5530/5532/22941/10681/54407/6505/81539/5594/8605/2775/2915/109/23236	SLC17A6/PLCB4/GRM1/GLS/GRIA1/GNG3/GLS2/ADCY9/ADCY1/GNAS/PPP3CA/PPP3CB/SHANK2/GNB5/SLC38A2/SLC1A1/SLC38A1/MAPK1/PLA2G4C/GNAO1/GRM5/ADCY3/PLCB1
hsa00190	Oxidative phosphorylation	85	0.701135	2.64029	0.000147558	0.000147558	0.00158173	2063	tags=71%, list=18%, signal=59%	534/7384/526/523/51606/1353/4706/4698/9377/6389/4719/1537/4729/527/54205/535/155066/1345/4723/4714/9550/4717/5464/51382/7386/27068/4694/537/4722/1349/9114/529/1351/4705/4704/1337/4702/4712/533/1327/4707/528/374291/27089/4724/4697/4700/4701/4696/4720/1329/479/1347/7381/4726/54539/4708/1340/4713/7385	ATP6V1G2/UQCRC1/ATP6V1B2/ATP6V1A/ATP6V1H/COX11/NDUFAB1/NDUFA5/COX5A/SDHA/NDUFS1/CYC1/NDUFV2/ATP6V0C/CYCS/ATP6V0A1/ATP6V0E2/COX6C/NDUFV1/NDUFB8/ATP6V1G1/NDUFC1/PPA1/ATP6V1D/UQCRFS1/PPA2/NDUFA1/ATP6AP1/NDUFS3/COX7B/ATP6V0D1/ATP6V1E1/COX8A/NDUFA10/NDUFA9/COX6A1/NDUFA8/NDUFB6/ATP6V0B/COX4I1/NDUFB1/ATP6V1C1/NDUFS7/UQCRQ/NDUFS4/NDUFA4/NDUFA6/NDUFA7/NDUFA3/NDUFS2/COX5B/ATP12A/COX7A2/UQCRB/NDUFS6/NDUFB11…
hsa04727	GABAergic synapse	76	0.628959	2.32368	0.000149925	0.000149925	0.00158173	816	tags=29%, list=7%, signal=27%	2571/2572/57468/9568/2554/2744/2785/27165/115/2566/23710/107/2550/6538/6529/10681/54407/10243/81539/3763/2558/2775	GAD1/GAD2/SLC12A5/GABBR2/GABRA1/GLS/GNG3/GLS2/ADCY9/GABRG2/GABARAPL1/ADCY1/GABBR1/SLC6A11/SLC6A1/GNB5/SLC38A2/GPHN/SLC38A1/KCNJ6/GABRA5/GNAO1
hsa04721	Synaptic vesicle cycle	64	0.721838	2.59497	0.000153586	0.000153586	0.00158173	1424	tags=52%, list=12%, signal=46%	6616/57084/6857/1759/6812/534/5864/526/523/26052/51606/6571/1213/6538/6536/6529/8775/1173/6505/1212/527/6844/6531/535/155066/9550/51382/9114/529/533/161/528/1175	SNAP25/SLC17A6/SYT1/DNM1/STXBP1/ATP6V1G2/RAB3A/ATP6V1B2/ATP6V1A/DNM3/ATP6V1H/SLC18A2/CLTC/SLC6A11/SLC6A9/SLC6A1/NAPA/AP2M1/SLC1A1/CLTB/ATP6V0C/VAMP2/SLC6A3/ATP6V0A1/ATP6V0E2/ATP6V1G1/ATP6V1D/ATP6V0D1/ATP6V1E1/ATP6V0B/AP2A2/ATP6V1C1/AP2S1
hsa05230	Central carbon metabolism in cancer	66	0.578609	2.08765	0.000153633	0.000153633	0.00158173	1775	tags=39%, list=15%, signal=34%	2744/5979/5214/27165/3815/5213/3098/8503/5315/5291/1956/3945/3939/4916/3845/5594/10000/5604/5223/5162/9997/3265/5160/5595/207/3418	GLS/RET/PFKP/GLS2/KIT/PFKM/HK1/PIK3R3/PKM/PIK3CB/EGFR/LDHB/LDHA/NTRK3/KRAS/MAPK1/AKT3/MAP2K1/PGAM1/PDHB/SCO2/HRAS/PDHA1/MAPK3/AKT1/IDH2
hsa00562	Inositol phosphate metabolism	65	0.557578	2.00809	0.000153752	0.000153752	0.00158173	1332	tags=31%, list=11%, signal=27%	5332/8867/22876/5297/3631/9110/23396/5291/4952/55361/8395/22908/27124/3612/3632/9896/7167/23236/9562/8898	PLCB4/SYNJ1/INPP5F/PI4KA/INPP4A/MTMR4/PIP5K1C/PIK3CB/OCRL/PI4K2A/PIP5K1B/SACM1L/INPP5J/IMPA1/INPP5A/FIG4/TPI1/PLCB1/MINPP1/MTMR2
hsa01230	Biosynthesis of amino acids	61	0.594553	2.11803	0.000154967	0.000154967	0.00158173	959	tags=38%, list=8%, signal=35%	2805/440/5214/2026/5213/384/5315/10993/50/3419/5631/2806/5230/1431/2023/230/3421/5223/48/7167/875/3420/226	GOT1/ASNS/PFKP/ENO2/PFKM/ARG2/PKM/SDS/ACO2/IDH3A/PRPS1/GOT2/PGK1/CS/ENO1/ALDOC/IDH3G/PGAM1/ACO1/TPI1/CBS/IDH3B/ALDOA
hsa04720	Long-term potentiation	61	0.522579	1.86163	0.000154967	0.000154967	0.00158173	2461	tags=43%, list=21%, signal=34%	5332/2911/2890/816/107/5530/5532/818/3845/5594/5604/6197/2915/23236/3265/2905/5595/114/3708/5502/5605/51806/5500/801/5567/2902	PLCB4/GRM1/GRIA1/CAMK2B/ADCY1/PPP3CA/PPP3CB/CAMK2G/KRAS/MAPK1/MAP2K1/RPS6KA3/GRM5/PLCB1/HRAS/GRIN2C/MAPK3/ADCY8/ITPR1/PPP1R1A/MAP2K2/CALML5/PPP1CB/CALM1/PRKACB/GRIN1
hsa00010	Glycolysis / Gluconeogenesis	58	0.558943	1.97488	0.000156006	0.000156006	0.00158173	1233	tags=34%, list=10%, signal=31%	5214/2026/5213/3098/5315/2821/3945/5236/3939/1738/5230/2023/230/5223/1737/7167/226/669/5162/9562	PFKP/ENO2/PFKM/HK1/PKM/GPI/LDHB/PGM1/LDHA/DLD/PGK1/ENO1/ALDOC/PGAM1/DLAT/TPI1/ALDOA/BPGM/PDHB/MINPP1
hsa04730	Long-term depression	51	0.577185	1.98658	0.000158353	0.000158353	0.00158173	1042	tags=29%, list=9%, signal=27%	5332/2911/2890/2778/10842/10672/3845/5515/5594/5604/8605/2775/5518/2781/23236	PLCB4/GRM1/GRIA1/GNAS/PPP1R17/GNA13/KRAS/PPP2CA/MAPK1/MAP2K1/PLA2G4C/GNAO1/PPP2R1A/GNAZ/PLCB1
hsa04961	Endocrine and other factor-regulated calcium reabsorption	49	0.585905	2.00136	0.000158932	0.000158932	0.00158173	1658	tags=41%, list=14%, signal=35%	1759/5332/491/26052/115/793/1213/2778/1173/1212/483/481/476/23236/6543/161/1175/493/8766/8218	DNM1/PLCB4/ATP2B2/DNM3/ADCY9/CALB1/CLTC/GNAS/AP2M1/CLTB/ATP1B3/ATP1B1/ATP1A1/PLCB1/SLC8A2/AP2A2/AP2S1/ATP2B4/RAB11A/CLTCL1
hsa00020	Citrate cycle (TCA cycle)	30	0.718488	2.21994	0.00016975	0.00016975	0.00158173	1457	tags=57%, list=12%, signal=50%	55753/4190/8803/47/6389/50/1738/3419/1431/3421/48/1737/4191/3420/5162/2271/5160	OGDHL/MDH1/SUCLA2/ACLY/SDHA/ACO2/DLD/IDH3A/CS/IDH3G/ACO1/DLAT/MDH2/IDH3B/PDHB/FH/PDHA1
hsa00250	Alanine, aspartate and glutamate metabolism	28	0.690801	2.10336	0.000171497	0.000171497	0.00158173	604	tags=29%, list=5%, signal=27%	2571/2572/2805/2744/440/27165/2806/7915	GAD1/GAD2/GOT1/GLS/ASNS/GLS2/GOT2/ALDH5A1
hsa05330	Allograft rejection	33	-0.583666	-2.02595	0.000247097	0.000247097	0.00166234	4343	tags=85%, list=37%, signal=54%	958/3458/3558/940/3565/3593/959/3111/941/3002/3112/3134/3586/3107/3133/3135/5551/942/355/3126/3105/3113/3106/3109/3108/3119/3115/3122	CD40/IFNG/IL2/CD28/IL4/IL12B/CD40LG/HLA-DOA/CD80/GZMB/HLA-DOB/HLA-F/IL10/HLA-C/HLA-E/HLA-G/PRF1/CD86/FAS/HLA-DRB4/HLA-A/HLA-DPA1/HLA-B/HLA-DMB/HLA-DMA/HLA-DQB1/HLA-DPB1/HLA-DRA
hsa05332	Graft-versus-host disease	36	-0.598978	-2.122	0.000249875	0.000249875	0.00166234	3358	tags=64%, list=28%, signal=46%	3111/941/3002/3112/3134/3569/3802/3107/3133/3135/5551/942/3824/355/3126/3105/3113/3106/3109/3108/3119/3115/3122	HLA-DOA/CD80/GZMB/HLA-DOB/HLA-F/IL6/KIR2DL1/HLA-C/HLA-E/HLA-G/PRF1/CD86/KLRD1/FAS/HLA-DRB4/HLA-A/HLA-DPA1/HLA-B/HLA-DMB/HLA-DMA/HLA-DQB1/HLA-DPB1/HLA-DRA
hsa04672	Intestinal immune network for IgA production	40	-0.596146	-2.15843	0.000258065	0.000258065	0.00166234	3414	tags=62%, list=29%, signal=45%	57379/959/3111/941/3112/4055/3569/3586/3695/3676/3600/942/3601/8741/6370/3126/608/3113/7852/3109/3108/3119/3115/6387/3122	AICDA/CD40LG/HLA-DOA/CD80/HLA-DOB/LTBR/IL6/IL10/ITGB7/ITGA4/IL15/CD86/IL15RA/TNFSF13/CCL25/HLA-DRB4/TNFRSF17/HLA-DPA1/CXCR4/HLA-DMB/HLA-DMA/HLA-DQB1/HLA-DPB1/CXCL12/HLA-DRA
hsa05322	Systemic lupus erythematosus	45	-0.553919	-2.05692	0.000268528	0.000268528	0.00166234	4494	tags=78%, list=38%, signal=48%	716/2209/958/3458/729/1991/940/718/1511/733/715/6737/735/959/3111/941/2903/3112/730/727/731/3586/942/3126/3113/3109/81/2215/3108/3119/3115/712/713/2212/3122	C1S/FCGR1A/CD40/IFNG/C6/ELANE/CD28/C3/CTSG/C8G/C1R/TRIM21/C9/CD40LG/HLA-DOA/CD80/GRIN2A/HLA-DOB/C7/C5/C8A/IL10/CD86/HLA-DRB4/HLA-DPA1/HLA-DMB/ACTN4/FCGR3B/HLA-DMA/HLA-DQB1/HLA-DPB1/C1QA/C1QB/FCGR2A/HLA-DRA
hsa05320	Autoimmune thyroid disease	46	-0.563305	-2.10075	0.000269687	0.000269687	0.00166234	3400	tags=63%, list=29%, signal=45%	959/3111/941/7038/1493/3002/3112/3134/1081/3586/3440/3107/3133/3135/3445/5551/942/355/7253/3126/3105/3113/3106/3109/3108/3119/3115/3439/3122	CD40LG/HLA-DOA/CD80/TG/CTLA4/GZMB/HLA-DOB/HLA-F/CGA/IL10/IFNA2/HLA-C/HLA-E/HLA-G/IFNA8/PRF1/CD86/FAS/TSHR/HLA-DRB4/HLA-A/HLA-DPA1/HLA-B/HLA-DMB/HLA-DMA/HLA-DQB1/HLA-DPB1/IFNA1/HLA-DRA
hsa05416	Viral myocarditis	54	-0.502771	-1.95483	0.00027465	0.00027465	0.00166234	3400	tags=61%, list=29%, signal=44%	959/3111/941/3383/3112/27/637/6442/842/3134/4624/1605/3107/3133/595/3135/5551/942/841/3126/3105/3113/857/3106/3109/5880/6445/3108/3119/3115/3683/3689/3122	CD40LG/HLA-DOA/CD80/ICAM1/HLA-DOB/ABL2/BID/SGCA/CASP9/HLA-F/MYH6/DAG1/HLA-C/HLA-E/CCND1/HLA-G/PRF1/CD86/CASP8/HLA-DRB4/HLA-A/HLA-DPA1/CAV1/HLA-B/HLA-DMB/RAC2/SGCG/HLA-DMA/HLA-DQB1/HLA-DPB1/ITGAL/ITGB2/HLA-DRA
hsa05321	Inflammatory bowel disease	59	-0.533415	-2.11367	0.000278707	0.000278707	0.00166234	2503	tags=51%, list=21%, signal=40%	6095/3569/3586/5970/3561/4088/50615/51561/6778/3460/8809/3566/4790/3459/3126/64127/3113/6774/7097/3595/3109/3605/3108/3119/3725/3115/3606/7100/4094/3122	RORA/IL6/IL10/RELA/IL2RG/SMAD3/IL21R/IL23A/STAT6/IFNGR2/IL18R1/IL4R/NFKB1/IFNGR1/HLA-DRB4/NOD2/HLA-DPA1/STAT3/TLR2/IL12RB2/HLA-DMB/IL17A/HLA-DMA/HLA-DQB1/JUN/HLA-DPB1/IL18/TLR5/MAF/HLA-DRA
hsa04932	Non-alcoholic fatty liver disease	134	0.436404	1.75339	0.000278901	0.000278901	0.00166234	2196	tags=42%, list=19%, signal=34%	5601/7384/4706/8503/4698/9377/5291/6389/4719/1537/4729/10000/54205/5602/1345/4723/4714/4717/3667/7386/4694/51085/4722/1349/6720/9451/1351/4705/4704/1337/4702/4712/1327/4707/374291/27089/4724/4697/4700/4701/4696/4720/1329/207/1347/7381/51422/4726/5571/54539/4708/1340/4713/7385/2931/1350	MAPK9/UQCRC1/NDUFAB1/PIK3R3/NDUFA5/COX5A/PIK3CB/SDHA/NDUFS1/CYC1/NDUFV2/AKT3/CYCS/MAPK10/COX6C/NDUFV1/NDUFB8/NDUFC1/IRS1/UQCRFS1/NDUFA1/MLXIPL/NDUFS3/COX7B/SREBF1/EIF2AK3/COX8A/NDUFA10/NDUFA9/COX6A1/NDUFA8/NDUFB6/COX4I1/NDUFB1/NDUFS7/UQCRQ/NDUFS4/NDUFA4/NDUFA6/NDUFA7/NDUFA3/NDUFS2/COX5B/AKT1/COX7A2/UQCRB/PRKAG2/NDUFS6/PRKAG1/NDUFB11/NDUFB2/COX6B1/NDUFB7/UQCRC2/GSK3A/COX7C
hsa04612	Antigen processing and presentation	64	-0.531463	-2.13697	0.000286451	0.000286451	0.00166234	3358	tags=56%, list=28%, signal=40%	3111/4800/4261/3112/3305/6892/567/3309/972/8302/3134/3802/2923/5994/5720/3107/3133/1508/3135/3824/3126/920/3105/3113/5641/6890/3106/3109/3808/3823/3108/3119/3115/3310/3122/1520	HLA-DOA/NFYA/CIITA/HLA-DOB/HSPA1L/TAPBP/B2M/HSPA5/CD74/KLRC4/HLA-F/KIR2DL1/PDIA3/RFXAP/PSME1/HLA-C/HLA-E/CTSB/HLA-G/KLRD1/HLA-DRB4/CD4/HLA-A/HLA-DPA1/LGMN/TAP1/HLA-B/HLA-DMB/KIR2DS3/KLRC3/HLA-DMA/HLA-DQB1/HLA-DPB1/HSPA6/HLA-DRA/CTSS
hsa05140	Leishmaniasis	70	-0.467326	-1.9092	0.000292141	0.000292141	0.00166234	1261	tags=33%, list=11%, signal=30%	3460/4790/5777/3459/1535/3126/3113/4792/3684/7097/3109/1536/2215/3108/3119/3725/3115/4689/3689/9103/5743/2212/3122	IFNGR2/NFKB1/PTPN6/IFNGR1/CYBA/HLA-DRB4/HLA-DPA1/NFKBIA/ITGAM/TLR2/HLA-DMB/CYBB/FCGR3B/HLA-DMA/HLA-DQB1/JUN/HLA-DPB1/NCF4/ITGB2/FCGR2C/PTGS2/FCGR2A/HLA-DRA
hsa05150	Staphylococcus aureus infection	71	-0.602192	-2.46721	0.00029274	0.00029274	0.00166234	1853	tags=44%, list=16%, signal=37%	5648/1671/1675/3868/719/2358/3426/3866/3880/1828/3126/3113/3684/2357/5724/3109/2215/3108/2213/3119/54474/3115/3683/3689/712/713/9103/728/2212/3122/3075	MASP1/DEFA6/CFD/KRT16/C3AR1/FPR2/CFI/KRT15/KRT19/DSG1/HLA-DRB4/HLA-DPA1/ITGAM/FPR1/PTAFR/HLA-DMB/FCGR3B/HLA-DMA/FCGR2B/HLA-DQB1/KRT20/HLA-DPB1/ITGAL/ITGB2/C1QA/C1QB/FCGR2C/C5AR1/FCGR2A/HLA-DRA/CFH
hsa04610	Complement and coagulation cascades	79	-0.46804	-1.95795	0.000302115	0.000302115	0.00166234	3624	tags=57%, list=31%, signal=40%	733/7035/715/2243/1378/735/629/2165/5054/5340/5328/730/81494/462/2158/727/3827/731/2244/3053/2152/5329/10877/5055/5648/1675/2153/719/2159/3426/2149/2/10544/5627/3684/710/5265/5327/3689/712/713/728/2162/11326/3075	C8G/TFPI/C1R/FGA/CR1/C9/CFB/F13B/SERPINE1/PLG/PLAU/C7/CFHR5/SERPINC1/F9/C5/KNG1/C8A/FGB/SERPIND1/F3/PLAUR/CFHR4/SERPINB2/MASP1/CFD/F5/C3AR1/F10/CFI/F2R/A2M/PROCR/PROS1/ITGAM/SERPING1/SERPINA1/PLAT/ITGB2/C1QA/C1QB/C5AR1/F13A1/VSIG4/CFH
hsa04260	Cardiac muscle contraction	70	0.52829	1.9246	0.000303998	0.000303998	0.00166234	2196	tags=46%, list=19%, signal=37%	7384/10479/55799/9254/9377/6262/1537/784/483/481/1345/476/7386/488/489/1349/1351/1337/6543/1327/27089/1329/1347/7381/782/477/444/1340/7385/3270/10368/1350	UQCRC1/SLC9A6/CACNA2D3/CACNA2D2/COX5A/RYR2/CYC1/CACNB3/ATP1B3/ATP1B1/COX6C/ATP1A1/UQCRFS1/ATP2A2/ATP2A3/COX7B/COX8A/COX6A1/SLC8A2/COX4I1/UQCRQ/COX5B/COX7A2/UQCRB/CACNB1/ATP1A2/ASPH/COX6B1/UQCRC2/HRC/CACNG3/COX7C
hsa04061	Viral protein interaction with cytokine and cytokine receptor	86	-0.634471	-2.6931	0.000311721	0.000311721	0.00166234	2518	tags=62%, list=21%, signal=49%	4049/8794/3559/4055/6372/3569/3586/6346/8740/6364/51554/3561/57007/6373/8793/6354/1435/1232/6375/8809/2833/6370/6362/6374/6368/8764/1235/29949/6352/5197/6366/7852/1234/7132/2920/3627/3576/1230/27178/3588/6363/3579/3606/8795/1436/6347/6351/3570/6387/2919/8743/3587/7133	LTA/TNFRSF10C/IL2RA/LTBR/CXCL6/IL6/IL10/CCL1/TNFSF14/CCL20/ACKR4/IL2RG/ACKR3/CXCL11/TNFRSF10D/CCL7/CSF1/CCR3/XCL1/IL18R1/CXCR3/CCL25/CCL18/CXCL5/CCL23/TNFRSF14/CCR6/IL19/CCL5/PF4V1/CCL21/CXCR4/CCR5/TNFRSF1A/CXCL2/CXCL10/CXCL8/CCR1/IL37/IL10RB/CCL19/CXCR2/IL18/TNFRSF10B/CSF1R/CCL2/CCL4/IL6R/CXCL12/CXCL1/TNFSF10/IL10RA/TNFRSF1B
hsa04640	Hematopoietic cell lineage	90	-0.510227	-2.18105	0.000315856	0.000315856	0.00166234	3159	tags=57%, list=27%, signal=42%	1440/3112/2814/924/3554/3675/3563/3673/7066/290/3690/3559/945/3569/3655/948/929/4254/1438/917/3581/3574/1791/3568/1437/2208/3676/1435/1441/3566/911/3678/3126/920/3113/930/915/3684/2993/3109/912/3672/3108/3119/3115/1436/2323/3570/951/7850/3122	CSF3/HLA-DOB/GP5/CD7/IL1R1/ITGA3/IL3RA/ITGA2/THPO/ANPEP/ITGB3/IL2RA/CD33/IL6/ITGA6/CD36/CD14/KITLG/CSF2RA/CD3G/IL9R/IL7/DNTT/IL5RA/CSF2/FCER2/ITGA4/CSF1/CSF3R/IL4R/CD1C/ITGA5/HLA-DRB4/CD4/HLA-DPA1/CD19/CD3D/ITGAM/GYPA/HLA-DMB/CD1D/ITGA1/HLA-DMA/HLA-DQB1/HLA-DPB1/CSF1R/FLT3LG/IL6R/CD37/IL1R2/HLA-DRA
hsa04064	NF-kappa B signaling pathway	93	-0.459356	-1.97697	0.000317561	0.000317561	0.00166234	2602	tags=41%, list=22%, signal=32%	596/4049/3932/4055/4615/29775/5970/8740/55367/929/7188/29760/8837/330/79092/3551/695/4790/4067/472/5335/6366/5336/4792/7132/2920/597/3576/6363/7128/6351/6850/7412/5743/6387/2919/8915/23643	BCL2/LTA/LCK/LTBR/MYD88/CARD10/RELA/TNFSF14/PIDD1/CD14/TRAF5/BLNK/CFLAR/BIRC3/CARD14/IKBKB/BTK/NFKB1/LYN/ATM/PLCG1/CCL21/PLCG2/NFKBIA/TNFRSF1A/CXCL2/BCL2A1/CXCL8/CCL19/TNFAIP3/CCL4/SYK/VCAM1/PTGS2/CXCL12/CXCL1/BCL10/LY96
hsa05164	Influenza A	156	-0.392457	-1.83961	0.000376223	0.000376223	0.00191759	1501	tags=28%, list=13%, signal=25%	3445/1021/10379/3460/114548/1965/3551/56649/29108/4790/355/841/3459/3126/57506/5295/6352/4600/3113/4792/83447/7132/3627/3109/834/5611/3576/578/3108/3119/64135/3115/7098/3606/8795/6347/51284/4938/3439/3665/3337/91543/8743/3122	IFNA8/CDK6/IRF9/IFNGR2/NLRP3/EIF2S1/IKBKB/TMPRSS4/PYCARD/NFKB1/FAS/CASP8/IFNGR1/HLA-DRB4/MAVS/PIK3R1/CCL5/MX2/HLA-DPA1/NFKBIA/SLC25A31/TNFRSF1A/CXCL10/HLA-DMB/CASP1/DNAJC3/CXCL8/BAK1/HLA-DMA/HLA-DQB1/IFIH1/HLA-DPB1/TLR3/IL18/TNFRSF10B/CCL2/TLR7/OAS1/IFNA1/IRF7/DNAJB1/RSAD2/TNFSF10/HLA-DRA
hsa04062	Chemokine signaling pathway	167	-0.336731	-1.59418	0.000389257	0.000389257	0.00193315	1510	tags=28%, list=13%, signal=25%	409/6354/7409/1232/6375/5829/3551/2833/4790/6370/6362/2309/6374/4067/5335/6368/2792/1235/5295/6352/5197/6366/5336/4792/6774/7852/1234/2920/3627/3576/112/5880/6093/2870/1230/6363/113/7454/3579/5568/6347/3055/6351/6387/2919/2268/1794	ARRB2/CCL7/VAV1/CCR3/XCL1/PXN/IKBKB/CXCR3/NFKB1/CCL25/CCL18/FOXO3/CXCL5/LYN/PLCG1/CCL23/GNGT1/CCR6/PIK3R1/CCL5/PF4V1/CCL21/PLCG2/NFKBIA/STAT3/CXCR4/CCR5/CXCL2/CXCL10/CXCL8/ADCY6/RAC2/ROCK1/GRK6/CCR1/CCL19/ADCY7/WAS/CXCR2/PRKACG/CCL2/HCK/CCL4/CXCL12/CXCL1/FGR/DOCK2
hsa05171	Coronavirus disease - COVID-19	200	-0.427852	-2.07389	0.000427533	0.000427533	0.00207016	2776	tags=46%, list=24%, signal=36%	730/6181/4312/5293/5599/5603/59272/6166/727/731/6161/6193/2244/6191/4615/3569/6165/3440/6235/4314/25873/6188/5970/6194/6143/6167/9636/9045/4940/6203/6300/6128/6152/5648/6217/6175/7297/6233/6141/1675/7311/1437/719/3445/6146/10379/6218/6136/114548/1636/3551/4790/6155/6157/4142/5335/11224/6135/6169/57506/140801/5295/4600/5336/6123/4792/6170/6774/7097/7132/3627/6171/834/6223/3576/1536/6210/8829/3725/…	C7/RPLP2/MMP1/PIK3CD/MAPK8/MAPK13/ACE2/RPL36AL/C5/C8A/RPL32/RPS5/FGB/RPS4X/MYD88/IL6/RPL35A/IFNA2/RPS29/MMP3/RPL36/RPS3/RELA/RPS6/RPL19/RPL37/ISG15/RPL14/OAS3/RPS9/MAPK12/RPL6/RPL24/MASP1/RPS16/RPLP0/TYK2/RPS27A/RPL18/CFD/UBA52/CSF2/C3AR1/IFNA8/RPL22/IRF9/RPS17/RPL12/NLRP3/ACE/IKBKB/NFKB1/RPL27/RPL27A/MAS1/PLCG1/RPL35/RPL11/RPL38/MAVS/RPL10L/PIK3R1/MX2/PLCG2/RPL3L/NFKBIA/RPL39/STAT3/TLR2/TNFRSF1A…
hsa00270	Cysteine and methionine metabolism	41	0.592323	1.95324	0.000486381	0.000486381	0.00225797	1526	tags=37%, list=13%, signal=32%	2805/4190/10993/3945/3939/2730/2806/4191/875/23382/6611/1036/2729/7263/1786	GOT1/MDH1/SDS/LDHB/LDHA/GCLM/GOT2/MDH2/CBS/AHCYL2/SMS/CDO1/GCLC/TST/DNMT1
hsa00620	Pyruvate metabolism	40	0.573072	1.87895	0.000489636	0.000489636	0.00225797	1457	tags=40%, list=12%, signal=35%	4190/5315/10873/3945/3939/31/1738/4199/1737/4191/39/2739/5162/2271/97/5160	MDH1/PKM/ME3/LDHB/LDHA/ACACA/DLD/ME1/DLAT/MDH2/ACAT2/GLO1/PDHB/FH/ACYP1/PDHA1
hsa04540	Gap junction	80	0.475904	1.77084	0.000597372	0.000597372	0.0026654	1621	tags=29%, list=14%, signal=25%	3358/5332/2911/7280/7277/115/10381/107/2778/1956/3845/5594/5604/10383/2915/109/23236/203068/3265/6654/5154/5595/108	HTR2C/PLCB4/GRM1/TUBB2A/TUBA4A/ADCY9/TUBB3/ADCY1/GNAS/EGFR/KRAS/MAPK1/MAP2K1/TUBB4B/GRM5/ADCY3/PLCB1/TUBB/HRAS/SOS1/PDGFA/MAPK3/ADCY2
hsa04911	Insulin secretion	74	0.48393	1.77775	0.00060551	0.00060551	0.0026654	1042	tags=24%, list=9%, signal=22%	6616/5332/5864/115/816/885/107/27445/2778/6262/116/818/6844/483/481/476/109/23236	SNAP25/PLCB4/RAB3A/ADCY9/CAMK2B/CCK/ADCY1/PCLO/GNAS/RYR2/ADCYAP1/CAMK2G/VAMP2/ATP1B3/ATP1B1/ATP1A1/ADCY3/PLCB1
hsa04659	Th17 cell differentiation	98	-0.398848	-1.73438	0.000642055	0.000642055	0.0026864	2645	tags=43%, list=22%, signal=34%	5599/5603/3932/6095/3559/919/3569/5970/6300/917/3561/7297/4088/50615/51561/6778/3460/3551/3566/4790/4775/3459/5335/3126/920/7048/9466/3113/915/4792/6774/3109/3605/3108/3119/3725/3115/196/10148/3570/3556/3122	MAPK8/MAPK13/LCK/RORA/IL2RA/CD247/IL6/RELA/MAPK12/CD3G/IL2RG/TYK2/SMAD3/IL21R/IL23A/STAT6/IFNGR2/IKBKB/IL4R/NFKB1/NFATC3/IFNGR1/PLCG1/HLA-DRB4/CD4/TGFBR2/IL27RA/HLA-DPA1/CD3D/NFKBIA/STAT3/HLA-DMB/IL17A/HLA-DMA/HLA-DQB1/JUN/HLA-DPB1/AHR/EBI3/IL6R/IL1RAP/HLA-DRA
hsa04670	Leukocyte transendothelial migration	99	-0.420363	-1.8307	0.000643087	0.000643087	0.0026864	1469	tags=31%, list=12%, signal=28%	3676/7409/5175/399/5829/100506658/7414/4313/4478/1365/1535/5335/29895/5295/23562/5336/3684/7852/1536/5880/6093/81/1003/10398/3683/4689/3689/50848/7412/6387/24146	ITGA4/VAV1/PECAM1/RHOH/PXN/OCLN/VCL/MMP2/MSN/CLDN3/CYBA/PLCG1/MYLPF/PIK3R1/CLDN14/PLCG2/ITGAM/CXCR4/CYBB/RAC2/ROCK1/ACTN4/CDH5/MYL9/ITGAL/NCF4/ITGB2/F11R/VCAM1/CXCL12/CLDN15
hsa04668	TNF signaling pathway	101	-0.389293	-1.70127	0.00065189	0.00065189	0.0026864	2656	tags=46%, list=23%, signal=36%	5293/5599/5603/4049/1906/6372/3569/4314/5970/4323/6364/7188/6300/8837/1437/330/8986/3600/1435/8809/3551/5609/4790/355/64764/90993/6374/841/5295/6352/64127/4792/7132/2920/840/3627/3725/3659/1326/7128/6347/7412/5743/6401/2919/7133	PIK3CD/MAPK8/MAPK13/LTA/EDN1/CXCL6/IL6/MMP3/RELA/MMP14/CCL20/TRAF5/MAPK12/CFLAR/CSF2/BIRC3/RPS6KA4/IL15/CSF1/IL18R1/IKBKB/MAP2K7/NFKB1/FAS/CREB3L2/CREB3L1/CXCL5/CASP8/PIK3R1/CCL5/NOD2/NFKBIA/TNFRSF1A/CXCL2/CASP7/CXCL10/JUN/IRF1/MAP3K8/TNFAIP3/CCL2/VCAM1/PTGS2/SELE/CXCL1/TNFRSF1B
hsa04650	Natural killer cell mediated cytotoxicity	111	-0.365759	-1.62423	0.000667111	0.000667111	0.00269185	1804	tags=31%, list=15%, signal=26%	3107/3133/962/3135/1437/3445/7409/5551/3460/3824/3937/355/5777/3459/5335/9437/5295/3105/5336/4277/3106/3808/5880/3823/2215/3384/3683/8795/7305/2207/3689/3439/6850/8743	HLA-C/HLA-E/CD48/HLA-G/CSF2/IFNA8/VAV1/PRF1/IFNGR2/KLRD1/LCP2/FAS/PTPN6/IFNGR1/PLCG1/NCR1/PIK3R1/HLA-A/PLCG2/MICB/HLA-B/KIR2DS3/RAC2/KLRC3/FCGR3B/ICAM2/ITGAL/TNFRSF10B/TYROBP/FCER1G/ITGB2/IFNA1/SYK/TNFSF10
hsa04380	Osteoclast differentiation	123	-0.357796	-1.61578	0.000685636	0.000685636	0.00271014	2720	tags=40%, list=23%, signal=31%	353514/5293/5599/5603/27035/3932/3690/10990/5970/54/10859/6300/653361/10288/7297/29760/9846/1435/10379/4286/3460/4982/3551/3937/695/5609/4790/3459/1535/5295/7048/5336/4792/7132/2215/2213/10326/3725/11006/4689/7305/1436/23547/11027/11025/6850/9103/2212/54209	LILRA5/PIK3CD/MAPK8/MAPK13/NOX1/LCK/ITGB3/LILRB5/RELA/ACP5/LILRB1/MAPK12/NCF1/LILRB2/TYK2/BLNK/GAB2/CSF1/IRF9/MITF/IFNGR2/TNFRSF11B/IKBKB/LCP2/BTK/MAP2K7/NFKB1/IFNGR1/CYBA/PIK3R1/TGFBR2/PLCG2/NFKBIA/TNFRSF1A/FCGR3B/FCGR2B/SIRPB1/JUN/LILRB4/NCF4/TYROBP/CSF1R/LILRA4/LILRA2/LILRB3/SYK/FCGR2C/FCGR2A/TREM2
hsa05310	Asthma	26	-0.606404	-1.98348	0.000705384	0.000705384	0.00273244	3757	tags=73%, list=32%, signal=50%	3565/3578/959/3111/3112/2205/6356/5553/3586/8288/3126/3113/3109/3108/3119/3115/2207/6037/3122	IL4/IL9/CD40LG/HLA-DOA/HLA-DOB/FCER1A/CCL11/PRG2/IL10/EPX/HLA-DRB4/HLA-DPA1/HLA-DMB/HLA-DMA/HLA-DQB1/HLA-DPB1/FCER1G/RNASE3/HLA-DRA
hsa05202	Transcriptional misregulation in cancer	159	-0.344895	-1.62642	0.000753864	0.000753864	0.00286297	2353	tags=40%, list=20%, signal=32%	8013/4353/2120/3002/5468/862/5328/3207/894/51513/51384/466/4233/3569/890/4314/5970/929/2078/860/64919/2005/6760/5079/3695/1671/51274/1437/330/1026/2530/7490/4286/942/5077/4299/2313/3065/4790/7704/6929/472/4297/6667/4208/4193/7048/5966/1848/3684/6756/597/904/3576/3206/8148/578/5327/7403/1436/1050/4094/7850	NR4A3/MPO/ETV6/GZMB/PPARG/RUNX1T1/PLAU/HOXA11/CCND2/ETV7/WNT16/ATF1/MET/IL6/CCNA2/MMP3/RELA/CD14/ERG/RUNX2/BCL11B/ELK4/SS18/PAX5/ITGB7/DEFA6/KLF3/CSF2/BIRC3/CDKN1A/FUT8/WT1/MITF/CD86/PAX3/AFF1/FLI1/HDAC1/NFKB1/ZBTB16/TCF3/ATM/KMT2A/SP1/MEF2C/MDM2/TGFBR2/REL/DUSP6/ITGAM/SSX1/BCL2A1/CCNT1/CXCL8/HOXA10/TAF15/BAK1/PLAT/KDM6A/CSF1R/CEBPA/MAF/IL1R2
hsa05169	Epstein-Barr virus infection	190	-0.320589	-1.54442	0.00083022	0.00083022	0.00303902	2696	tags=39%, list=23%, signal=31%	10018/5293/5599/5603/596/842/3134/919/3516/4615/3569/890/3440/317/5970/22938/2923/9636/4940/7188/6300/917/3107/7297/3133/595/3135/29760/3445/2208/1021/1026/10379/3551/695/3065/5609/4790/355/4734/3280/841/4067/3126/57506/4193/5295/3105/3113/930/915/5336/4792/6774/7097/7431/3627/6890/3106/3109/578/3108/864/3119/3725/6502/953/3115/3683/7128/4938/3439/3665/6850/3122	BCL2L11/PIK3CD/MAPK8/MAPK13/BCL2/CASP9/HLA-F/CD247/RBPJ/MYD88/IL6/CCNA2/IFNA2/APAF1/RELA/SNW1/PDIA3/ISG15/OAS3/TRAF5/MAPK12/CD3G/HLA-C/TYK2/HLA-E/CCND1/HLA-G/BLNK/IFNA8/FCER2/CDK6/CDKN1A/IRF9/IKBKB/BTK/HDAC1/MAP2K7/NFKB1/FAS/NEDD4/HES1/CASP8/LYN/HLA-DRB4/MAVS/MDM2/PIK3R1/HLA-A/HLA-DPA1/CD19/CD3D/PLCG2/NFKBIA/STAT3/TLR2/VIM/CXCL10/TAP1/HLA-B/HLA-DMB/BAK1/HLA-DMA/RUNX3/HLA-DQB1/JUN/SKP2/ENTPD1/HLA-…
hsa05417	Lipid and atherosclerosis	192	-0.316297	-1.52424	0.000831601	0.000831601	0.00303902	1232	tags=23%, list=10%, signal=21%	114548/1965/3551/338/29108/5609/4790/355/25833/4775/841/4067/1535/5335/4973/5451/5295/6352/4792/6774/7097/7132/2920/840/834/3576/1536/91860/3725/19/3606/8795/4689/6347/3439/22926/3665/3310/7412/6401/2919/8743/7184/23643	NLRP3/EIF2S1/IKBKB/APOB/PYCARD/MAP2K7/NFKB1/FAS/POU2F3/NFATC3/CASP8/LYN/CYBA/PLCG1/OLR1/POU2F1/PIK3R1/CCL5/NFKBIA/STAT3/TLR2/TNFRSF1A/CXCL2/CASP7/CASP1/CXCL8/CYBB/CALML4/JUN/ABCA1/IL18/TNFRSF10B/NCF4/CCL2/IFNA1/ATF6/IRF7/HSPA6/VCAM1/SELE/CXCL1/TNFSF10/HSP90B1/LY96
hsa05133	Pertussis	65	-0.443015	-1.78856	0.000857633	0.000857633	0.00307611	2774	tags=46%, list=24%, signal=35%	3688/5599/5603/727/6372/4615/3569/3586/5970/929/6300/3394/51561/114548/29108/4790/6374/3678/3684/840/834/3576/710/91860/3725/3659/3689/712/713/23643	ITGB1/MAPK8/MAPK13/C5/CXCL6/MYD88/IL6/IL10/RELA/CD14/MAPK12/IRF8/IL23A/NLRP3/PYCARD/NFKB1/CXCL5/ITGA5/ITGAM/CASP7/CASP1/CXCL8/SERPING1/CALML4/JUN/IRF1/ITGB2/C1QA/C1QB/LY96
hsa04070	Phosphatidylinositol signaling system	83	0.466285	1.74896	0.000889021	0.000889021	0.00313071	2419	tags=39%, list=21%, signal=31%	5332/8867/22876/5297/3631/9110/23396/8503/5291/4952/55361/8395/22908/23262/3612/3632/8760/23236/9677/8898/10423/56623/9807/3708/8897/9107/8396/8776/5287/51806/1608/801	PLCB4/SYNJ1/INPP5F/PI4KA/INPP4A/MTMR4/PIP5K1C/PIK3R3/PIK3CB/OCRL/PI4K2A/PIP5K1B/SACM1L/PPIP5K2/IMPA1/INPP5A/CDS2/PLCB1/PPIP5K1/MTMR2/CDIPT/INPP5E/IP6K1/ITPR1/MTMR3/MTMR6/PIP4K2B/MTMR1/PIK3C2B/CALML5/DGKG/CALM1
hsa04929	GnRH secretion	59	0.505925	1.79261	0.000935454	0.000935454	0.0032354	1751	tags=32%, list=15%, signal=28%	9568/5332/8503/2550/5291/3845/5594/10000/3763/5604/8911/408/3765/23236/3265/5595/3781/610/207	GABBR2/PLCB4/PIK3R3/GABBR1/PIK3CB/KRAS/MAPK1/AKT3/KCNJ6/MAP2K1/CACNA1I/ARRB1/KCNJ9/PLCB1/HRAS/MAPK3/KCNN2/HCN2/AKT1
hsa00900	Terpenoid backbone biosynthesis	19	0.687405	1.9104	0.00108382	0.00108382	0.00365838	2086	tags=53%, list=18%, signal=43%	51449/3422/3157/3156/39/79947/2224/4597/23463/38	PCYOX1/IDI1/HMGCS1/HMGCR/ACAT2/DHDDS/FDPS/MVD/ICMT/ACAT1
hsa04621	NOD-like receptor signaling pathway	146	-0.338251	-1.56982	0.0010989	0.0010989	0.00365838	2365	tags=34%, list=20%, signal=28%	4615/3569/3440/5970/4940/84168/81858/7188/6300/5027/440738/3428/837/7297/10616/1671/1508/10135/79792/3445/330/10379/114548/3551/29108/4790/838/841/1535/9051/57506/6352/64127/3710/4792/2920/834/3576/1536/10628/3725/3606/7128/6347/4938/3439/3665/2634/2919/2633	MYD88/IL6/IFNA2/RELA/OAS3/ANTXR1/SHARPIN/TRAF5/MAPK12/P2RX7/MAP1LC3C/IFI16/CASP4/TYK2/RBCK1/DEFA6/CTSB/NAMPT/GSDMD/IFNA8/BIRC3/IRF9/NLRP3/IKBKB/PYCARD/NFKB1/CASP5/CASP8/CYBA/PSTPIP1/MAVS/CCL5/NOD2/ITPR3/NFKBIA/CXCL2/CASP1/CXCL8/CYBB/TXNIP/JUN/IL18/TNFAIP3/CCL2/OAS1/IFNA1/IRF7/GBP2/CXCL1/GBP1
hsa01210	2-Oxocarboxylic acid metabolism	13	0.759741	1.92344	0.00111441	0.00111441	0.00365838	946	tags=62%, list=8%, signal=57%	2805/50/3419/2806/1431/3421/48/3420	GOT1/ACO2/IDH3A/GOT2/CS/IDH3G/ACO1/IDH3B
hsa04514	Cell adhesion molecules	122	-0.348115	-1.56885	0.00137221	0.00137221	0.0044296	1933	tags=32%, list=16%, signal=27%	999/923/3695/3107/3133/5133/58494/3135/1013/5789/3676/5175/942/100506658/1365/3126/920/3105/23562/3113/6402/6614/3684/3106/3109/3108/3119/10666/3384/1003/3115/3683/3689/5788/50848/7412/6401/3122/24146	CDH1/CD6/ITGB7/HLA-C/HLA-E/PDCD1/JAM2/HLA-G/CDH15/PTPRD/ITGA4/PECAM1/CD86/OCLN/CLDN3/HLA-DRB4/CD4/HLA-A/CLDN14/HLA-DPA1/SELL/SIGLEC1/ITGAM/HLA-B/HLA-DMB/HLA-DMA/HLA-DQB1/CD226/ICAM2/CDH5/HLA-DPB1/ITGAL/ITGB2/PTPRC/F11R/VCAM1/SELE/HLA-DRA/CLDN15
hsa00030	Pentose phosphate pathway	25	0.633257	1.87564	0.00139519	0.00139519	0.00442993	1163	tags=32%, list=10%, signal=29%	5214/5213/2821/5236/5631/230/226/7086	PFKP/PFKM/GPI/PGM1/PRPS1/ALDOC/ALDOA/TKT
hsa05110	Vibrio cholerae infection	42	0.55146	1.82784	0.00145255	0.00145255	0.0044841	1422	tags=43%, list=12%, signal=38%	534/526/523/115/51606/2778/55176/527/535/155066/9550/51382/537/109/9114/529/533/528	ATP6V1G2/ATP6V1B2/ATP6V1A/ADCY9/ATP6V1H/GNAS/SEC61A2/ATP6V0C/ATP6V0A1/ATP6V0E2/ATP6V1G1/ATP6V1D/ATP6AP1/ADCY3/ATP6V0D1/ATP6V1E1/ATP6V0B/ATP6V1C1
hsa00220	Arginine biosynthesis	17	0.711509	1.92216	0.00145985	0.00145985	0.0044841	580	tags=29%, list=5%, signal=28%	2805/2744/27165/384/2806	GOT1/GLS/GLS2/ARG2/GOT2
hsa04713	Circadian entrainment	83	0.455452	1.70833	0.0014817	0.0014817	0.0044841	2461	tags=37%, list=21%, signal=30%	5332/2890/2785/115/816/107/2778/6262/116/818/10681/5594/3763/8911/2775/3765/109/23236/2782/2905/5595/108/114/3708/6261/6263/51806/8913/801/5567/2902	PLCB4/GRIA1/GNG3/ADCY9/CAMK2B/ADCY1/GNAS/RYR2/ADCYAP1/CAMK2G/GNB5/MAPK1/KCNJ6/CACNA1I/GNAO1/KCNJ9/ADCY3/PLCB1/GNB1/GRIN2C/MAPK3/ADCY2/ADCY8/ITPR1/RYR1/RYR3/CALML5/CACNA1G/CALM1/PRKACB/GRIN1
hsa05033	Nicotine addiction	31	0.596626	1.85507	0.00152517	0.00152517	0.00454462	213	tags=13%, list=2%, signal=13%	57084/2554/2890/2566	SLC17A6/GABRA1/GRIA1/GABRG2
hsa05032	Morphine addiction	76	0.464228	1.71508	0.00164918	0.00164918	0.00483969	1207	tags=22%, list=10%, signal=20%	9568/2554/2785/5141/115/2566/107/2550/2778/10681/3763/2558/2775/408/3765/109/2782	GABBR2/GABRA1/GNG3/PDE4A/ADCY9/GABRG2/ADCY1/GABBR1/GNAS/GNB5/KCNJ6/GABRA5/GNAO1/ARRB1/KCNJ9/ADCY3/GNB1
hsa01240	Biosynthesis of cofactors	105	0.43073	1.67351	0.00172265	0.00172265	0.00497986	3354	tags=45%, list=28%, signal=32%	23057/55312/8836/4830/5805/2730/1738/8566/10243/7360/4351/8630/51109/9054/23475/51727/2729/211/80025/51805/1503/3145/7389/5498/790/27430/4337/586/224/158/2235/1352/4522/102157402/203/1728/6470/79646/55163/27010/11019/29968/7390/29922/217/80347/4338	NMNAT2/RFK/GGH/NME1/PTS/GCLM/DLD/PDXK/GPHN/UGP2/MPI/HSD17B6/RDH11/NFS1/QPRT/CMPK1/GCLC/ALAS1/PANK2/COQ3/CTPS1/HMBS/UROD/PPOX/CAD/MAT2B/MOCS1/BCAT1/ALDH3A2/ADSL/FECH/COX10/MTHFD1/AK6/AK1/NQO1/SHMT1/PANK3/PNPO/TPK1/LIAS/PSAT1/UROS/NME7/ALDH2/COASY/MOCS2
hsa05144	Malaria	44	-0.473005	-1.74709	0.00213732	0.00213732	0.00602902	3493	tags=57%, list=30%, signal=40%	1378/959/3383/1440/2994/7043/4233/4615/3569/3586/948/3820/2532/3082/5175/2993/7097/3576/3606/3683/6347/3689/7412/6401/2995	CR1/CD40LG/ICAM1/CSF3/GYPB/TGFB3/MET/MYD88/IL6/IL10/CD36/KLRB1/ACKR1/HGF/PECAM1/GYPA/TLR2/CXCL8/IL18/ITGAL/CCL2/ITGB2/VCAM1/SELE/GYPC
hsa04657	IL-17 signaling pathway	85	-0.386873	-1.63863	0.00217054	0.00217054	0.00602902	2842	tags=44%, list=24%, signal=33%	2932/6356/4312/10758/5599/5603/4586/6372/3569/4314/5970/6364/7188/6300/6278/1437/1994/6279/6354/3551/4790/3934/6374/841/4792/2920/3627/3576/3605/23765/3725/6280/7128/6347/5743/2919/7184	GSK3B/CCL11/MMP1/TRAF3IP2/MAPK8/MAPK13/MUC5AC/CXCL6/IL6/MMP3/RELA/CCL20/TRAF5/MAPK12/S100A7/CSF2/ELAVL1/S100A8/CCL7/IKBKB/NFKB1/LCN2/CXCL5/CASP8/NFKBIA/CXCL2/CXCL10/CXCL8/IL17A/IL17RA/JUN/S100A9/TNFAIP3/CCL2/PTGS2/CXCL1/HSP90B1
hsa04725	Cholinergic synapse	96	0.437927	1.67795	0.00217897	0.00217897	0.00602902	1621	tags=26%, list=14%, signal=23%	5332/3785/2785/43/115/816/107/8503/5291/818/10681/3845/5594/10000/3763/5604/2775/109/23236/2782/3761/3265/1131/5595/108	PLCB4/KCNQ2/GNG3/ACHE/ADCY9/CAMK2B/ADCY1/PIK3R3/PIK3CB/CAMK2G/GNB5/KRAS/MAPK1/AKT3/KCNJ6/MAP2K1/GNAO1/ADCY3/PLCB1/GNB1/KCNJ4/HRAS/CHRM3/MAPK3/ADCY2
hsa04922	Glucagon signaling pathway	88	0.447951	1.69314	0.00235919	0.00235919	0.00643573	1802	tags=27%, list=15%, signal=23%	5332/5214/10891/5213/816/5315/2778/5530/5532/3945/818/3939/31/10000/5223/5837/23236/5162/5531/5160/108/207/51422/5571	PLCB4/PFKP/PPARGC1A/PFKM/CAMK2B/PKM/GNAS/PPP3CA/PPP3CB/LDHB/CAMK2G/LDHA/ACACA/AKT3/PGAM1/PYGM/PLCB1/PDHB/PPP4C/PDHA1/ADCY2/AKT1/PRKAG2/PRKAG1
hsa05145	Toxoplasmosis	102	-0.358449	-1.57088	0.00258398	0.00258398	0.00693045	3697	tags=53%, list=31%, signal=37%	10319/5294/3717/2773/23533/836/3593/959/3111/3918/4261/3112/3305/8651/3911/3688/7043/5599/5603/596/842/79444/4615/3586/5970/3655/240/6300/3915/7297/330/3460/3551/4790/22798/841/3459/3126/3113/3912/4792/6774/1234/7097/7132/3109/3108/3588/3119/3115/3310/3587/3122/23643	LAMC3/PIK3CG/JAK2/GNAI3/PIK3R5/CASP3/IL12B/CD40LG/HLA-DOA/LAMC2/CIITA/HLA-DOB/HSPA1L/SOCS1/LAMA5/ITGB1/TGFB3/MAPK8/MAPK13/BCL2/CASP9/BIRC7/MYD88/IL10/RELA/ITGA6/ALOX5/MAPK12/LAMC1/TYK2/BIRC3/IFNGR2/IKBKB/NFKB1/LAMB4/CASP8/IFNGR1/HLA-DRB4/HLA-DPA1/LAMB1/NFKBIA/STAT3/CCR5/TLR2/TNFRSF1A/HLA-DMB/HLA-DMA/IL10RB/HLA-DQB1/HLA-DPB1/HSPA6/IL10RA/HLA-DRA/LY96
hsa04114	Oocyte meiosis	97	0.427532	1.6421	0.0026121	0.0026121	0.00693045	2433	tags=39%, list=21%, signal=31%	7533/115/816/107/5530/5532/818/5527/22849/5515/5594/5604/6197/5518/109/996/25847/7531/7529/891/898/5595/108/8379/9232/8454/7534/114/5526/5528/3708/8945/51806/10971/5500/801/5567/9700	YWHAH/ADCY9/CAMK2B/ADCY1/PPP3CA/PPP3CB/CAMK2G/PPP2R5C/CPEB3/PPP2CA/MAPK1/MAP2K1/RPS6KA3/PPP2R1A/ADCY3/CDC27/ANAPC13/YWHAE/YWHAB/CCNB1/CCNE1/MAPK3/ADCY2/MAD1L1/PTTG1/CUL1/YWHAZ/ADCY8/PPP2R5B/PPP2R5D/ITPR1/BTRC/CALML5/YWHAQ/PPP1CB/CALM1/PRKACB/ESPL1
hsa05167	Kaposi sarcoma-associated herpesvirus infection	176	-0.310061	-1.47917	0.00277118	0.00277118	0.00725316	1804	tags=28%, list=15%, signal=24%	3107/7297/3133/595/6233/3135/7311/1437/3445/1021/1026/10379/1232/942/3551/5609/4790/355/4775/841/3459/4067/5335/5155/2792/5295/3105/6932/5336/3710/4792/6774/1234/7132/2920/4277/3106/3576/578/91860/1230/3725/7098/3439/3055/3665/6850/5743/2919/9976	HLA-C/TYK2/HLA-E/CCND1/RPS27A/HLA-G/UBA52/CSF2/IFNA8/CDK6/CDKN1A/IRF9/CCR3/CD86/IKBKB/MAP2K7/NFKB1/FAS/NFATC3/CASP8/IFNGR1/LYN/PLCG1/PDGFB/GNGT1/PIK3R1/HLA-A/TCF7/PLCG2/ITPR3/NFKBIA/STAT3/CCR5/TNFRSF1A/CXCL2/MICB/HLA-B/CXCL8/BAK1/CALML4/CCR1/JUN/TLR3/IFNA1/HCK/IRF7/SYK/PTGS2/CXCL1/CLEC2B
hsa04072	Phospholipase D signaling pathway	131	0.397444	1.59249	0.00293953	0.00293953	0.00759121	1621	tags=25%, list=14%, signal=22%	1759/5332/2911/26052/3815/115/23396/107/8503/5291/2778/1956/8395/185/10672/3845/5594/10000/5604/8605/2915/5899/6009/7249/109/23236/183/56848/3265/6654/5154/5595/108	DNM1/PLCB4/GRM1/DNM3/KIT/ADCY9/PIP5K1C/ADCY1/PIK3R3/PIK3CB/GNAS/EGFR/PIP5K1B/AGTR1/GNA13/KRAS/MAPK1/AKT3/MAP2K1/PLA2G4C/GRM5/RALB/RHEB/TSC2/ADCY3/PLCB1/AGT/SPHK2/HRAS/SOS1/PDGFA/MAPK3/ADCY2
hsa05323	Rheumatoid arthritis	79	-0.387153	-1.61958	0.00302115	0.00302115	0.00769932	1548	tags=37%, list=13%, signal=32%	1437/8992/51561/3600/1435/942/8741/10312/6374/3126/6352/3113/7097/2920/3109/3576/3605/3108/5741/3119/3725/3115/3606/3683/6347/3689/6387/2919/3122	CSF2/ATP6V0E1/IL23A/IL15/CSF1/CD86/TNFSF13/TCIRG1/CXCL5/HLA-DRB4/CCL5/HLA-DPA1/TLR2/CXCL2/HLA-DMB/CXCL8/IL17A/HLA-DMA/PTH/HLA-DQB1/JUN/HLA-DPB1/IL18/ITGAL/CCL2/ITGB2/CXCL12/CXCL1/HLA-DRA
hsa04261	Adrenergic signaling in cardiomyocytes	129	0.401346	1.60641	0.00308037	0.00308037	0.0077483	2507	tags=37%, list=21%, signal=30%	5332/491/115/816/55799/107/9254/2778/6262/818/5527/185/784/5515/5594/10000/6324/483/481/476/5518/488/489/109/23236/55012/183/6543/55844/493/5521/5595/108/207/782/477/114/5526/5528/10368/5502/11069/51806/5500/801/5567/490/1386	PLCB4/ATP2B2/ADCY9/CAMK2B/CACNA2D3/ADCY1/CACNA2D2/GNAS/RYR2/CAMK2G/PPP2R5C/AGTR1/CACNB3/PPP2CA/MAPK1/AKT3/SCN1B/ATP1B3/ATP1B1/ATP1A1/PPP2R1A/ATP2A2/ATP2A3/ADCY3/PLCB1/PPP2R3C/AGT/SLC8A2/PPP2R2D/ATP2B4/PPP2R2B/MAPK3/ADCY2/AKT1/CACNB1/ATP1A2/ADCY8/PPP2R5B/PPP2R5D/CACNG3/PPP1R1A/RAPGEF4/CALML5/PPP1CB/CALM1/PRKACB/ATP2B1/ATF2
hsa05340	Primary immunodeficiency	33	-0.510875	-1.77329	0.00345935	0.00345935	0.00859003	4345	tags=79%, list=37%, signal=50%	29851/958/7535/973/3543/8625/925/100/57379/959/4261/326/7374/3932/5897/5994/3561/29760/5896/64421/695/920/930/915/6890/5788	ICOS/CD40/ZAP70/CD79A/IGLL1/RFXANK/CD8A/ADA/AICDA/CD40LG/CIITA/AIRE/UNG/LCK/RAG2/RFXAP/IL2RG/BLNK/RAG1/DCLRE1C/BTK/CD4/CD19/CD3D/TAP1/PTPRC
hsa00430	Taurine and hypotaurine metabolism	12	0.71724	1.77586	0.00434865	0.00434865	0.0106616	17	tags=17%, list=0%, signal=17%	2571/2572	GAD1/GAD2
hsa00051	Fructose and mannose metabolism	28	0.575412	1.75202	0.00463042	0.00463042	0.0112105	1435	tags=32%, list=12%, signal=28%	5214/5213/3098/6652/230/4351/7167/226/231	PFKP/PFKM/HK1/SORD/ALDOC/MPI/TPI1/ALDOA/AKR1B1
hsa05031	Amphetamine addiction	57	0.470916	1.65817	0.00499922	0.00499922	0.0119539	729	tags=18%, list=6%, signal=17%	2890/1644/7054/816/6571/2778/5530/5532/818/6531	GRIA1/DDC/TH/CAMK2B/SLC18A2/GNAS/PPP3CA/PPP3CB/CAMK2G/SLC6A3
hsa00480	Glutathione metabolism	43	0.509039	1.69732	0.00545834	0.00545834	0.0128926	2254	tags=44%, list=19%, signal=36%	4259/2730/2952/2944/2947/2878/2946/2941/2879/6611/79017/79094/2729/26873/3418/2936/9446/10314/6723	MGST3/GCLM/GSTT1/GSTM1/GSTM3/GPX3/GSTM2/GSTA4/GPX4/SMS/GGCT/CHAC1/GCLC/OPLAH/IDH2/GSR/GSTO1/LANCL1/SRM
hsa05152	Tuberculosis	161	-0.307024	-1.45049	0.0056926	0.0056926	0.0132839	2700	tags=36%, list=23%, signal=28%	7421/9902/7043/5599/5603/596/842/4615/3569/3586/3440/317/5970/11151/815/929/5994/6300/26253/4046/3916/64581/3445/51561/3460/4790/10312/8411/841/3459/3126/22925/64127/3113/3684/4360/7097/7132/3109/2215/3108/2213/91860/3588/3119/1263/3115/3606/2207/3689/3439/6850/9103/3587/8915/2212/3122/1520	VDR/MRC2/TGFB3/MAPK8/MAPK13/BCL2/CASP9/MYD88/IL6/IL10/IFNA2/APAF1/RELA/CORO1A/CAMK2A/CD14/RFXAP/MAPK12/CLEC4E/LSP1/LAMP1/CLEC7A/IFNA8/IL23A/IFNGR2/NFKB1/TCIRG1/EEA1/CASP8/IFNGR1/HLA-DRB4/PLA2R1/NOD2/HLA-DPA1/ITGAM/MRC1/TLR2/TNFRSF1A/HLA-DMB/FCGR3B/HLA-DMA/FCGR2B/CALML4/IL10RB/HLA-DQB1/PLK3/HLA-DPB1/IL18/FCER1G/ITGB2/IFNA1/SYK/FCGR2C/IL10RA/BCL10/FCGR2A/HLA-DRA/CTSS
hsa04150	mTOR signaling pathway	126	0.388273	1.5475	0.00577628	0.00577628	0.0133187	2183	tags=31%, list=19%, signal=25%	534/526/523/51606/8503/5291/81929/3845/5594/10000/5604/10670/6197/23175/9550/6009/3667/7249/51382/55615/529/1147/8649/8408/10641/3265/7472/528/6654/9663/5595/51719/207/6249/8321/81617/1977/2887/5605	ATP6V1G2/ATP6V1B2/ATP6V1A/ATP6V1H/PIK3R3/PIK3CB/SEH1L/KRAS/MAPK1/AKT3/MAP2K1/RRAGA/RPS6KA3/LPIN1/ATP6V1G1/RHEB/IRS1/TSC2/ATP6V1D/PRR5/ATP6V1E1/CHUK/LAMTOR3/ULK1/NPRL2/HRAS/WNT2/ATP6V1C1/SOS1/LPIN2/MAPK3/CAB39/AKT1/CLIP1/FZD1/CAB39L/EIF4E/GRB10/MAP2K2
hsa04623	Cytosolic DNA-sensing pathway	51	-0.426276	-1.63594	0.00650936	0.00650936	0.0147222	1170	tags=27%, list=10%, signal=25%	3445/3551/29108/4790/57506/6352/81030/4792/3627/834/3606/3439/6351/3665	IFNA8/IKBKB/PYCARD/NFKB1/MAVS/CCL5/ZBP1/NFKBIA/CXCL10/CASP1/IL18/IFNA1/CCL4/IRF7
hsa04742	Taste transduction	60	0.460085	1.63426	0.00653696	0.00653696	0.0147222	342	tags=10%, list=3%, signal=10%	9568/5332/2911/2554/6328/2550	GABBR2/PLCB4/GRM1/GABRA1/SCN3A/GABBR1
hsa05130	Pathogenic Escherichia coli infection	169	-0.301308	-1.43127	0.00699029	0.00699029	0.0155622	1232	tags=24%, list=10%, signal=22%	114548/3551/29108/4790/355/4651/100506658/79861/2149/841/5777/1365/4642/10109/9181/10163/3059/1902/81027/23562/9871/4792/3071/7456/7132/840/2846/834/3576/6093/578/3725/4542/3606/8795/7100/10095/8743/2212/24146	NLRP3/IKBKB/PYCARD/NFKB1/FAS/MYO10/OCLN/TUBAL3/F2R/CASP8/PTPN6/CLDN3/MYO1D/ARPC2/ARHGEF2/WASF2/HCLS1/LPAR1/TUBB1/CLDN14/SEC24D/NFKBIA/NCKAP1L/WIPF1/TNFRSF1A/CASP7/LPAR4/CASP1/CXCL8/ROCK1/BAK1/JUN/MYO1F/IL18/TNFRSF10B/TLR5/ARPC1B/TNFSF10/FCGR2A/CLDN15
hsa00650	Butanoate metabolism	22	0.608044	1.74862	0.00725535	0.00725535	0.0159687	1208	tags=32%, list=10%, signal=29%	2571/2572/3157/7915/39/5019/65985	GAD1/GAD2/HMGCS1/ALDH5A1/ACAT2/OXCT1/AACS
hsa04392	Hippo signaling pathway - multiple species	21	-0.558433	-1.72587	0.00752566	0.00752566	0.0163775	3512	tags=71%, list=30%, signal=50%	79981/9770/60485/1454/8994/11186/8642/55233/6788/79633/9113/54798/7004/7005/25937	FRMD1/RASSF2/SAV1/CSNK1E/LIMD1/RASSF1/DCHS1/MOB1A/STK3/FAT4/LATS1/DCHS2/TEAD4/TEAD3/WWTR1
hsa04962	Vasopressin-regulated water reabsorption	39	0.51304	1.67236	0.00771884	0.00771884	0.0166113	1553	tags=36%, list=13%, signal=31%	1780/115/398/51164/2778/1778/361/6844/10540/51143/109/8766/5868/1639	DYNC1I1/ADCY9/ARHGDIG/DCTN4/GNAS/DYNC1H1/AQP4/VAMP2/DCTN2/DYNC1LI1/ADCY3/RAB11A/RAB5A/DCTN1
hsa03050	Proteasome	41	0.507753	1.67436	0.00794423	0.00794423	0.0169085	3157	tags=76%, list=27%, signal=56%	5718/5709/5714/5682/5708/9861/5707/5705/5706/5694/10197/5689/5695/5684/10213/5685/5710/5713/5693/5700/5717/5690/51371/5692/5701/11047/5719/5702/5715/5686/5688	PSMD12/PSMD3/PSMD8/PSMA1/PSMD2/PSMD6/PSMD1/PSMC5/PSMC6/PSMB6/PSME3/PSMB1/PSMB7/PSMA3/PSMD14/PSMA4/PSMD4/PSMD7/PSMB5/PSMC1/PSMD11/PSMB2/POMP/PSMB4/PSMC2/ADRM1/PSMD13/PSMC3/PSMD9/PSMA5/PSMA7
hsa04950	Maturity onset diabetes of the young	22	-0.551008	-1.72339	0.00804413	0.00804413	0.016935	5113	tags=86%, list=43%, signal=49%	50674/3175/5313/5078/4760/2645/4821/3630/6927/3110/6514/3174/6928/3651/4825/3375/5080/2494/3280	NEUROG3/ONECUT1/PKLR/PAX4/NEUROD1/GCK/NKX2-2/INS/HNF1A/MNX1/SLC2A2/HNF4G/HNF1B/PDX1/NKX6-1/IAPP/PAX6/NR5A2/HES1
hsa04966	Collecting duct acid secretion	22	0.600612	1.72724	0.00831711	0.00831711	0.0173214	1422	tags=50%, list=12%, signal=44%	534/526/523/527/535/155066/9550/51382/9114/529/528	ATP6V1G2/ATP6V1B2/ATP6V1A/ATP6V0C/ATP6V0A1/ATP6V0E2/ATP6V1G1/ATP6V1D/ATP6V0D1/ATP6V1E1/ATP6V1C1
hsa04144	Endocytosis	199	0.345274	1.45772	0.00849895	0.00849895	0.0175118	1940	tags=25%, list=16%, signal=21%	273/1759/6456/10193/56904/26052/30845/440073/1213/23396/60682/1956/5590/9829/55040/8395/1173/26056/8027/8723/1212/8853/9922/408/10552/10564/9525/116987/57403/81873/3265/161/11059/1175/25978/57180/50855/8766/3949/5868/10097/9101/8218/2869/11311/9146/3800/4087/55737	AMPH/DNM1/SH3GL2/RNF41/SH3GLB2/DNM3/EHD3/IQSEC3/CLTC/PIP5K1C/SMAP1/EGFR/PRKCZ/DNAJC6/EPN3/PIP5K1B/AP2M1/RAB11FIP5/STAM/SNX4/CLTB/ASAP2/IQSEC1/ARRB1/ARPC1A/ARFGEF2/VPS4B/AGAP1/RAB22A/ARPC5L/HRAS/AP2A2/WWP1/AP2S1/CHMP2B/ACTR3B/PARD6A/RAB11A/LDLR/RAB5A/ACTR2/USP8/CLTCL1/GRK5/VPS45/HGS/KIF5C/SMAD2/VPS35
hsa05034	Alcoholism	86	0.41274	1.55599	0.0103032	0.0103032	0.021006	2853	tags=38%, list=24%, signal=29%	1644/2785/7054/6571/2778/10681/3845/5594/5604/6531/2775/2782/4915/10014/3265/2905/6654/2030/5595/1813/10013/51806/5500/801/5567/2902/4129/1386/9759/627/2783/5501/5569	DDC/GNG3/TH/SLC18A2/GNAS/GNB5/KRAS/MAPK1/MAP2K1/SLC6A3/GNAO1/GNB1/NTRK2/HDAC5/HRAS/GRIN2C/SOS1/SLC29A1/MAPK3/DRD2/HDAC6/CALML5/PPP1CB/CALM1/PRKACB/GRIN1/MAOB/ATF2/HDAC4/BDNF/GNB2/PPP1CC/PKIA
hsa05134	Legionellosis	50	-0.417263	-1.59324	0.0108607	0.0108607	0.0218549	2365	tags=46%, list=20%, signal=37%	4615/3569/317/5970/929/57396/51128/29108/4790/841/1195/4792/3684/7097/2920/840/834/3576/3606/7100/3689/3310/2919	MYD88/IL6/APAF1/RELA/CD14/CLK4/SAR1B/PYCARD/NFKB1/CASP8/CLK1/NFKBIA/ITGAM/TLR2/CXCL2/CASP7/CASP1/CXCL8/IL18/TLR5/ITGB2/HSPA6/CXCL1
hsa04926	Relaxin signaling pathway	114	0.38417	1.51092	0.0109453	0.0109453	0.0218549	1042	tags=19%, list=9%, signal=18%	5332/2785/5601/6416/115/107/8503/5291/2778/1956/5590/10681/1910/3845/5594/10000/5602/5604/2775/408/109/23236	PLCB4/GNG3/MAPK9/MAP2K4/ADCY9/ADCY1/PIK3R3/PIK3CB/GNAS/EGFR/PRKCZ/GNB5/EDNRB/KRAS/MAPK1/AKT3/MAPK10/MAP2K1/GNAO1/ARRB1/ADCY3/PLCB1
hsa04726	Serotonergic synapse	95	0.398723	1.52508	0.0116499	0.0116499	0.0230245	852	tags=16%, list=7%, signal=15%	3358/5332/1644/2785/3751/6571/2778/10681/3845/5594/3763/5604/8605/2775/3765	HTR2C/PLCB4/DDC/GNG3/KCND2/SLC18A2/GNAS/GNB5/KRAS/MAPK1/KCNJ6/MAP2K1/PLA2G4C/GNAO1/KCNJ9
hsa00630	Glyoxylate and dicarboxylate metabolism	22	0.594022	1.70829	0.0118563	0.0118563	0.0231958	2124	tags=50%, list=18%, signal=41%	4190/50/1738/1431/48/4191/39/283871/5095/38/5096	MDH1/ACO2/DLD/CS/ACO1/MDH2/ACAT2/PGP/PCCA/ACAT1/PCCB
hsa04140	Autophagy - animal	121	0.375255	1.48805	0.012728	0.012728	0.0246522	2966	tags=44%, list=25%, signal=33%	5601/9110/23710/8503/5291/1612/3845/5515/5594/10000/5602/5604/10670/30849/664/6009/3667/7249/29982/9821/23192/8408/9451/81631/8678/55255/3265/572/1509/26100/5595/207/5861/79065/3708/8897/10533/9474/5605/7879/23130/5567/5588/3091/6199/7189/2475/5289/3920/598/22800/64223/6794	MAPK9/MTMR4/GABARAPL1/PIK3R3/PIK3CB/DAPK1/KRAS/PPP2CA/MAPK1/AKT3/MAPK10/MAP2K1/RRAGA/PIK3R4/BNIP3/RHEB/IRS1/TSC2/NRBF2/RB1CC1/ATG4B/ULK1/EIF2AK3/MAP1LC3B/BECN1/WDR41/HRAS/BAD/CTSD/WIPI2/MAPK3/AKT1/RAB1A/ATG9A/ITPR1/MTMR3/ATG7/ATG5/MAP2K2/RAB7A/ATG2A/PRKACB/PRKCQ/HIF1A/RPS6KB2/TRAF6/MTOR/PIK3C3/LAMP2/BCL2L1/RRAS2/MLST8/STK11
hsa01250	Biosynthesis of nucleotide sugars	30	0.534155	1.6504	0.0130708	0.0130708	0.0250654	1407	tags=30%, list=12%, signal=26%	55907/3098/2821/5236/2592/7360/4351/54187/10020	CMAS/HK1/GPI/PGM1/GALT/UGP2/MPI/NANS/GNE
hsa04936	Alcoholic liver disease	128	-0.312931	-1.42447	0.0132128	0.0132128	0.0250893	2645	tags=33%, list=22%, signal=26%	5599/5603/727/5465/51176/4615/223/3569/3440/5970/929/6300/595/79602/131/719/3445/125/5562/51/3551/126/5609/4790/355/2309/841/6932/4792/7132/2920/3576/3605/23765/712/3439/713/728/2919/79966/29896/23643	MAPK8/MAPK13/C5/PPARA/LEF1/MYD88/ALDH9A1/IL6/IFNA2/RELA/CD14/MAPK12/CCND1/ADIPOR2/ADH7/C3AR1/IFNA8/ADH1B/PRKAA1/ACOX1/IKBKB/ADH1C/MAP2K7/NFKB1/FAS/FOXO3/CASP8/TCF7/NFKBIA/TNFRSF1A/CXCL2/CXCL8/IL17A/IL17RA/C1QA/IFNA1/C1QB/C5AR1/CXCL1/SCD5/TRA2A/LY96
hsa04925	Aldosterone synthesis and secretion	83	0.40734	1.52787	0.0143725	0.0143725	0.0270265	2507	tags=39%, list=21%, signal=31%	5332/491/115/816/107/2778/818/185/483/8911/481/476/3777/109/23236/183/493/3949/4929/57172/108/5587/8536/477/114/3708/51806/8913/801/5567/490/1386	PLCB4/ATP2B2/ADCY9/CAMK2B/ADCY1/GNAS/CAMK2G/AGTR1/ATP1B3/CACNA1I/ATP1B1/ATP1A1/KCNK3/ADCY3/PLCB1/AGT/ATP2B4/LDLR/NR4A2/CAMK1G/ADCY2/PRKD1/CAMK1/ATP1A2/ADCY8/ITPR1/CALML5/CACNA1G/CALM1/PRKACB/ATP2B1/ATF2
hsa04910	Insulin signaling pathway	124	0.369116	1.46907	0.0146582	0.0146582	0.0272872	2426	tags=33%, list=21%, signal=27%	5575/5601/10891/3098/8503/2194/5291/5590/31/3845/5594/10000/5602/5604/5837/3632/6009/3667/5577/7249/6720/3265/6654/572/5595/207/51422/23265/5571/5573/8569/1977/5509/5605/5257/2002/51806/23433/5500/801/5567	PRKAR1B/MAPK9/PPARGC1A/HK1/PIK3R3/FASN/PIK3CB/PRKCZ/ACACA/KRAS/MAPK1/AKT3/MAPK10/MAP2K1/PYGM/INPP5A/RHEB/IRS1/PRKAR2B/TSC2/SREBF1/HRAS/SOS1/BAD/MAPK3/AKT1/PRKAG2/EXOC7/PRKAG1/PRKAR1A/MKNK1/EIF4E/PPP1R3D/MAP2K2/PHKB/ELK1/CALML5/RHOQ/PPP1CB/CALM1/PRKACB
hsa04921	Oxytocin signaling pathway	126	0.366453	1.46053	0.0147929	0.0147929	0.0272872	2426	tags=35%, list=21%, signal=28%	5332/115/816/55799/107/9254/2778/5530/5532/1956/6262/818/784/3845/5594/3763/5604/8605/2775/3765/109/23236/3761/3265/57172/5595/108/8536/51422/5571/782/114/9475/3708/140465/10368/5605/6261/2002/6263/51806/5500/801/5567	PLCB4/ADCY9/CAMK2B/CACNA2D3/ADCY1/CACNA2D2/GNAS/PPP3CA/PPP3CB/EGFR/RYR2/CAMK2G/CACNB3/KRAS/MAPK1/KCNJ6/MAP2K1/PLA2G4C/GNAO1/KCNJ9/ADCY3/PLCB1/KCNJ4/HRAS/CAMK1G/MAPK3/ADCY2/CAMK1/PRKAG2/PRKAG1/CACNB1/ADCY8/ROCK2/ITPR1/MYL6B/CACNG3/MAP2K2/RYR1/ELK1/RYR3/CALML5/PPP1CB/CALM1/PRKACB
hsa04964	Proximal tubule bicarbonate reclamation	21	0.582741	1.65712	0.0149546	0.0149546	0.0273252	796	tags=29%, list=7%, signal=27%	2744/4190/27165/483/481/476	GLS/MDH1/GLS2/ATP1B3/ATP1B1/ATP1A1
hsa04662	B cell receptor signaling pathway	76	-0.35272	-1.46343	0.0162065	0.0162065	0.0293359	1810	tags=36%, list=15%, signal=30%	10288/25780/27071/974/29760/7409/3551/695/4790/4775/5777/4067/5295/971/930/5336/4792/5880/2213/3725/11006/8519/23547/11027/11025/6850/8915	LILRB2/RASGRP3/DAPP1/CD79B/BLNK/VAV1/IKBKB/BTK/NFKB1/NFATC3/PTPN6/LYN/PIK3R1/CD72/CD19/PLCG2/NFKBIA/RAC2/FCGR2B/JUN/LILRB4/IFITM1/LILRA4/LILRA2/LILRB3/SYK/BCL10
hsa00280	Valine, leucine and isoleucine degradation	41	0.481093	1.58645	0.0163748	0.0163748	0.0293662	2270	tags=39%, list=19%, signal=32%	549/3157/1738/39/5019/65985/27034/18/5095/38/5096/26275/586/224/64087/593	AUH/HMGCS1/DLD/ACAT2/OXCT1/AACS/ACAD8/ABAT/PCCA/ACAT1/PCCB/HIBCH/BCAT1/ALDH3A2/MCCC2/BCKDHA
hsa04919	Thyroid hormone signaling pathway	112	0.369679	1.45021	0.0190747	0.0190747	0.0338943	1042	tags=16%, list=9%, signal=15%	5332/5214/10231/5213/8503/5291/3845/5594/10000/483/5604/481/476/6009/7249/488/489/23236	PLCB4/PFKP/RCAN2/PFKM/PIK3R3/PIK3CB/KRAS/MAPK1/AKT3/ATP1B3/MAP2K1/ATP1B1/ATP1A1/RHEB/TSC2/ATP2A2/ATP2A3/PLCB1
hsa04915	Estrogen signaling pathway	117	0.366274	1.44545	0.0197135	0.0197135	0.0347109	1621	tags=21%, list=14%, signal=19%	9568/5332/2911/115/107/8503/2550/5291/2778/1956/3845/5594/10000/3763/5604/2775/3765/109/23236/2289/3265/6654/1509/5595/108	GABBR2/PLCB4/GRM1/ADCY9/ADCY1/PIK3R3/GABBR1/PIK3CB/GNAS/EGFR/KRAS/MAPK1/AKT3/KCNJ6/MAP2K1/GNAO1/KCNJ9/ADCY3/PLCB1/FKBP5/HRAS/SOS1/CTSD/MAPK3/ADCY2
hsa04914	Progesterone-mediated oocyte maturation	76	0.406993	1.50363	0.01994	0.01994	0.0347934	1751	tags=28%, list=15%, signal=24%	5601/115/107/8503/5291/22849/3845/5594/10000/5602/5604/6197/109/996/25847/891/8900/5595/108/8379/207	MAPK9/ADCY9/ADCY1/PIK3R3/PIK3CB/CPEB3/KRAS/MAPK1/AKT3/MAPK10/MAP2K1/RPS6KA3/ADCY3/CDC27/ANAPC13/CCNB1/CCNA1/MAPK3/ADCY2/MAD1L1/AKT1
hsa04630	JAK-STAT signaling pathway	145	-0.294097	-1.3657	0.0203267	0.0203267	0.0351514	4322	tags=53%, list=37%, signal=34%	3458/5617/208/3572/4352/3456/3558/896/58985/6655/2056/9021/3455/59067/3977/3441/3454/3565/3560/9180/3717/3578/3593/2033/1440/8651/1950/3563/3952/894/30837/5293/7066/596/3559/3569/3586/5771/3440/5159/1438/64109/3561/3581/3574/7297/595/3568/50615/1437/3445/51561/3600/1026/6778/10379/3460/3601/1441/3566/2688/5292/5777/3597/3459/5155/29949/5295/9466/6774/3595/4170/3588/5618/3439/3570/3587	IFNG/PRL/AKT2/IL6ST/MPL/IFNB1/IL2/CCND3/IL22RA1/SOS2/EPO/SOCS3/IFNAR2/IL21/LIFR/IFNA4/IFNAR1/IL4/IL2RB/OSMR/JAK2/IL9/IL12B/EP300/CSF3/SOCS1/EGF/IL3RA/LEP/CCND2/SOCS7/PIK3CD/THPO/BCL2/IL2RA/IL6/IL10/PTPN2/IFNA2/PDGFRB/CSF2RA/CRLF2/IL2RG/IL9R/IL7/TYK2/CCND1/IL5RA/IL21R/CSF2/IFNA8/IL23A/IL15/CDKN1A/STAT6/IRF9/IFNGR2/IL15RA/CSF3R/IL4R/GH1/PIM1/PTPN6/IL13RA1/IFNGR1/PDGFB/IL19/PIK3R1/IL27RA/STAT3/IL12R…
hsa04979	Cholesterol metabolism	45	-0.411914	-1.5296	0.0206767	0.0206767	0.0351851	2589	tags=40%, list=22%, signal=31%	27329/1593/5360/26119/345/948/3988/29116/1581/64240/27141/338/10577/6646/9388/19/4036/341	ANGPTL3/CYP27A1/PLTP/LDLRAP1/APOC3/CD36/LIPA/MYLIP/CYP7A1/ABCG5/CIDEB/APOB/NPC2/SOAT1/LIPG/ABCA1/LRP2/APOC1
hsa04912	GnRH signaling pathway	80	0.40249	1.49767	0.0207587	0.0207587	0.0351851	1621	tags=25%, list=14%, signal=22%	5332/5601/6416/115/816/107/2778/1956/818/3845/5594/5602/5604/8605/109/23236/3265/6654/5595/108	PLCB4/MAPK9/MAP2K4/ADCY9/CAMK2B/ADCY1/GNAS/EGFR/CAMK2G/KRAS/MAPK1/MAPK10/MAP2K1/PLA2G4C/ADCY3/PLCB1/HRAS/SOS1/MAPK3/ADCY2
hsa00520	Amino sugar and nucleotide sugar metabolism	40	0.474825	1.55683	0.0208911	0.0208911	0.0351851	1407	tags=28%, list=12%, signal=24%	55907/3098/2821/5236/2592/7360/4351/54187/51700/51706/10020	CMAS/HK1/GPI/PGM1/GALT/UGP2/MPI/NANS/CYB5R2/CYB5R1/GNE
hsa04658	Th1 and Th2 cell differentiation	83	-0.339515	-1.4324	0.0215186	0.0215186	0.0359294	2645	tags=40%, list=22%, signal=31%	5599/5603/3932/3559/919/3516/5970/6300/917/3561/7297/6778/3460/3551/3566/4790/4775/3459/5335/3126/920/3113/915/4792/3595/3109/3108/864/3119/3725/3115/4094/3122	MAPK8/MAPK13/LCK/IL2RA/CD247/RBPJ/RELA/MAPK12/CD3G/IL2RG/TYK2/STAT6/IFNGR2/IKBKB/IL4R/NFKB1/NFATC3/IFNGR1/PLCG1/HLA-DRB4/CD4/HLA-DPA1/CD3D/NFKBIA/IL12RB2/HLA-DMB/HLA-DMA/RUNX3/HLA-DQB1/JUN/HLA-DPB1/MAF/HLA-DRA
hsa04152	AMPK signaling pathway	105	0.373669	1.45181	0.0219638	0.0219638	0.0363594	2058	tags=29%, list=17%, signal=24%	5214/10891/5213/8503/2194/5291/5527/31/3156/5515/10000/6009/3667/5518/7249/5862/55012/8408/6720/55844/8900/5521/51719/207/51422/5571/5526/5528/81617/23417	PFKP/PPARGC1A/PFKM/PIK3R3/FASN/PIK3CB/PPP2R5C/ACACA/HMGCR/PPP2CA/AKT3/RHEB/IRS1/PPP2R1A/TSC2/RAB2A/PPP2R3C/ULK1/SREBF1/PPP2R2D/CCNA1/PPP2R2B/CAB39/AKT1/PRKAG2/PRKAG1/PPP2R5B/PPP2R5D/CAB39L/MLYCD
hsa05030	Cocaine addiction	41	0.46856	1.54512	0.023022	0.023022	0.0377882	729	tags=17%, list=6%, signal=16%	1644/8851/1020/7054/6571/2778/6531	DDC/CDK5R1/CDK5/TH/SLC18A2/GNAS/SLC6A3
hsa04973	Carbohydrate digestion and absorption	36	0.486003	1.55489	0.0251667	0.0251667	0.0409612	1042	tags=25%, list=9%, signal=23%	5332/3098/8503/5291/10000/483/481/476/23236	PLCB4/HK1/PIK3R3/PIK3CB/AKT3/ATP1B3/ATP1B1/ATP1A1/PLCB1
hsa04071	Sphingolipid signaling pathway	107	0.368284	1.4359	0.0259777	0.0259777	0.041929	1981	tags=28%, list=17%, signal=24%	5332/5601/253782/8503/5291/5590/5527/10672/3845/5515/5594/10000/5602/5604/5518/23236/55012/56848/55844/3265/6609/81537/1509/8560/5521/5595/207/5526/5528/9475	PLCB4/MAPK9/CERS6/PIK3R3/PIK3CB/PRKCZ/PPP2R5C/GNA13/KRAS/PPP2CA/MAPK1/AKT3/MAPK10/MAP2K1/PPP2R1A/PLCB1/PPP2R3C/SPHK2/PPP2R2D/HRAS/SMPD1/SGPP1/CTSD/DEGS1/PPP2R2B/MAPK3/AKT1/PPP2R5B/PPP2R5D/ROCK2
hsa00062	Fatty acid elongation	14	0.62464	1.60724	0.0266617	0.0266617	0.0423746	179	tags=14%, list=2%, signal=14%	11332/6785	ACOT7/ELOVL4
hsa04935	Growth hormone synthesis, secretion and action	109	0.365443	1.42884	0.0266914	0.0266914	0.0423746	1042	tags=17%, list=9%, signal=15%	5332/6750/5601/6416/115/107/8503/5291/2778/3486/3845/5594/10000/5602/5604/3667/109/23236	PLCB4/SST/MAPK9/MAP2K4/ADCY9/ADCY1/PIK3R3/PIK3CB/GNAS/IGFBP3/KRAS/MAPK1/AKT3/MAPK10/MAP2K1/IRS1/ADCY3/PLCB1
hsa04625	C-type lectin receptor signaling pathway	94	-0.317813	-1.37142	0.031746	0.031746	0.0499895	1606	tags=31%, list=14%, signal=27%	6300/26253/4046/1960/1959/64581/51561/10379/114548/3551/29108/4790/4775/841/4193/5295/5336/3710/4792/834/91860/3725/3659/1263/2207/6237/6850/5743/8915	MAPK12/CLEC4E/LSP1/EGR3/EGR2/CLEC7A/IL23A/IRF9/NLRP3/IKBKB/PYCARD/NFKB1/NFATC3/CASP8/MDM2/PIK3R1/PLCG2/ITPR3/NFKBIA/CASP1/CALML4/JUN/IRF1/PLK3/FCER1G/RRAS/SYK/PTGS2/BCL10
hsa03013	Nucleocytoplasmic transport	89	0.377652	1.4308	0.0321256	0.0321256	0.0501792	2371	tags=31%, list=20%, signal=25%	1917/6612/81929/3836/9688/1434/8563/10921/65109/59343/9972/7329/11260/3838/80145/3839/5905/10284/5903/55705/23039/5901/53371/55746/23636/2733/23511/23633	EEF1A2/SUMO3/SEH1L/KPNA1/NUP93/CSE1L/THOC5/RNPS1/UPF3B/SENP2/NUP153/UBE2I/XPOT/KPNA2/THOC7/KPNA3/RANGAP1/SAP18/RANBP2/IPO9/XPO7/RAN/NUP54/NUP133/NUP62/GLE1/NUP188/KPNA6
hsa04120	Ubiquitin mediated proteolysis	118	0.348126	1.37417	0.0390958	0.0390958	0.0605779	2801	tags=37%, list=24%, signal=29%	4591/26232/9063/22954/8924/9040/7317/10477/27339/996/25847/8453/55585/10273/55120/11059/8452/25898/9039/10055/27338/8925/7326/7322/3093/9690/8454/7329/7324/8945/10277/55236/7328/23327/1642/997/7189/9354/6500/7337/7332/991/51465/55284	TRIM37/FBXO2/PIAS2/TRIM32/HERC2/UBE2M/UBA1/UBE2E3/PRPF19/CDC27/ANAPC13/CUL2/UBE2Q1/STUB1/FANCL/WWP1/CUL3/RCHY1/UBA3/SAE1/UBE2S/HERC1/UBE2G1/UBE2D2/UBE2K/UBE3C/CUL1/UBE2I/UBE2E1/BTRC/UBE4B/UBA6/UBE2H/NEDD4L/DDB1/CDC34/TRAF6/UBE4A/SKP1/UBE3A/UBE2L3/CDC20/UBE2J1/UBE2W
hsa04750	Inflammatory mediator regulation of TRP channels	82	0.379899	1.42185	0.0399465	0.0399465	0.0614049	1042	tags=17%, list=9%, signal=16%	3358/5332/5601/115/816/107/8503/5291/2778/818/5602/8605/109/23236	HTR2C/PLCB4/MAPK9/ADCY9/CAMK2B/ADCY1/PIK3R3/PIK3CB/GNAS/CAMK2G/MAPK10/PLA2G4C/ADCY3/PLCB1
hsa05120	Epithelial cell signaling in Helicobacter pylori infection	64	0.399483	1.43612	0.0408539	0.0408539	0.061837	1422	tags=30%, list=12%, signal=26%	534/5601/526/523/6416/51606/1956/527/5602/535/155066/9550/51382/537/9114/529/1147/533/528	ATP6V1G2/MAPK9/ATP6V1B2/ATP6V1A/MAP2K4/ATP6V1H/EGFR/ATP6V0C/MAPK10/ATP6V0A1/ATP6V0E2/ATP6V1G1/ATP6V1D/ATP6AP1/ATP6V0D1/ATP6V1E1/CHUK/ATP6V0B/ATP6V1C1
hsa04145	Phagosome	132	-0.285121	-1.30585	0.0408662	0.0408662	0.061837	1081	tags=23%, list=9%, signal=22%	1783/10312/79861/8411/1535/3678/3126/4973/22925/3105/81027/3113/3684/4360/7097/6890/3106/3109/1536/2215/3108/2213/3119/3115/4689/3689/9103/4481/2212/3122/1520	DYNC1LI2/TCIRG1/TUBAL3/EEA1/CYBA/ITGA5/HLA-DRB4/OLR1/PLA2R1/HLA-A/TUBB1/HLA-DPA1/ITGAM/MRC1/TLR2/TAP1/HLA-B/HLA-DMB/CYBB/FCGR3B/HLA-DMA/FCGR2B/HLA-DQB1/HLA-DPB1/NCF4/ITGB2/FCGR2C/MSR1/FCGR2A/HLA-DRA/CTSS
hsa05162	Measles	128	-0.286324	-1.30335	0.0441586	0.0441586	0.0663009	2656	tags=32%, list=23%, signal=25%	5293/5599/596/842/3559/4615/3569/3440/317/5970/4940/917/3561/7297/595/3445/1021/10379/1965/3551/4790/355/4478/841/57506/5295/4600/915/4792/6774/7097/578/2213/3725/64135/7128/51284/4938/3439/3665/3310	PIK3CD/MAPK8/BCL2/CASP9/IL2RA/MYD88/IL6/IFNA2/APAF1/RELA/OAS3/CD3G/IL2RG/TYK2/CCND1/IFNA8/CDK6/IRF9/EIF2S1/IKBKB/NFKB1/FAS/MSN/CASP8/MAVS/PIK3R1/MX2/CD3D/NFKBIA/STAT3/TLR2/BAK1/FCGR2B/JUN/IFIH1/TNFAIP3/TLR7/OAS1/IFNA1/IRF7/HSPA6
hsa05213	Endometrial cancer	55	0.409974	1.43218	0.0466394	0.0466394	0.06914	1751	tags=31%, list=15%, signal=26%	10912/8503/5291/1956/3845/5594/10000/5604/324/1496/1647/10297/3265/6654/572/5595/207	GADD45G/PIK3R3/PIK3CB/EGFR/KRAS/MAPK1/AKT3/MAP2K1/APC/CTNNA2/GADD45A/APC2/HRAS/SOS1/BAD/MAPK3/AKT1
hsa04024	cAMP signaling pathway	189	0.313784	1.31628	0.04684	0.04684	0.06914	1040	tags=15%, list=9%, signal=14%	9568/2890/6750/5141/491/5601/115/10451/816/7432/107/8503/2550/5291/2778/6262/116/818/5594/10000/5602/483/5604/481/476/488/489/109	GABBR2/GRIA1/SST/PDE4A/ATP2B2/MAPK9/ADCY9/VAV3/CAMK2B/VIP/ADCY1/PIK3R3/GABBR1/PIK3CB/GNAS/RYR2/ADCYAP1/CAMK2G/MAPK1/AKT3/MAPK10/ATP1B3/MAP2K1/ATP1B1/ATP1A1/ATP2A2/ATP2A3/ADCY3
hsa05203	Viral carcinogenesis	154	-0.271103	-1.26939	0.0471204	0.0471204	0.06914	2404	tags=32%, list=20%, signal=26%	4055/3516/890/5970/22938/23513/1030/983/7188/51564/3107/3133/595/5933/1960/3135/1959/6672/1021/5366/1026/10379/1232/2957/5829/3065/4790/64764/90993/841/4067/4193/5295/3105/5966/4792/6774/1234/3106/81/578/3725/6502/5922/5568/85477/2967/3665/6850	LTBR/RBPJ/CCNA2/RELA/SNW1/SCRIB/CDKN2B/CDK1/TRAF5/HDAC7/HLA-C/HLA-E/CCND1/RBL1/EGR3/HLA-G/EGR2/SP100/CDK6/PMAIP1/CDKN1A/IRF9/CCR3/GTF2A1/PXN/HDAC1/NFKB1/CREB3L2/CREB3L1/CASP8/LYN/MDM2/PIK3R1/HLA-A/REL/NFKBIA/STAT3/CCR5/HLA-B/ACTN4/BAK1/JUN/SKP2/RASA2/PRKACG/SCIN/GTF2H3/IRF7/SYK

## Sheet: GRIA1
Supplementary Table S5 |Gene Set Enrichment Analyses identification of GRIA1-related signaling pathways
ID	Description	setSize	enrichmentScore	NES	pvalue	p.adjust	qvalues	rank	leading_edge	core_enrichment	gene_name
hsa05012	Parkinson disease	199	0.41278	1.76681	0.000164393	0.000164393	0.00184416	2885	tags=43%, list=24%, signal=33%	7345/6571/816/2774/7384/7277/4719/5601/291/5709/64837/4698/10381/4729/3800/3831/7054/4720/6389/1537/7280/818/6531/10131/4704/10383/7416/4714/5708/3708/5718/5713/7317/4705/1812/4706/54205/203068/5705/6622/9377/7386/2778/1337/5684/4723/5717/7419/4701/5702/5695/5707/1813/55669/4137/5710/1345/4724/5690/4697/25800/7385/5567/292/65018/11047/5693/55334/9927/1347/1327/10105/4722/7417/5685/5714/5602/7295/…	UCHL1/SLC18A2/CAMK2B/GNAL/UQCRC1/TUBA4A/NDUFS1/MAPK9/SLC25A4/PSMD3/KLC2/NDUFA5/TUBB3/NDUFV2/KIF5C/KLC1/TH/NDUFS2/SDHA/CYC1/TUBB2A/CAMK2G/SLC6A3/TRAP1/NDUFA9/TUBB4B/VDAC1/NDUFB8/PSMD2/ITPR1/PSMD12/PSMD7/UBA1/NDUFA10/DRD1/NDUFAB1/CYCS/TUBB/PSMC5/SNCA/COX5A/UQCRFS1/GNAS/COX6A1/PSMA3/NDUFV1/PSMD11/VDAC3/NDUFA7/PSMC3/PSMB7/PSMD1/DRD2/MFN1/MAPT/PSMD4/COX6C/NDUFS4/PSMB2/NDUFA4/SLC39A6/UQCRC2/PRKACB/SLC2…
hsa05017	Spinocerebellar ataxia	130	0.551629	2.23682	0.000171145	0.000171145	0.00184416	2848	tags=50%, list=24%, signal=38%	2890/2911/5332/6712/5601/291/5709/3752/4976/5291/8503/489/5173/2891/30849/2259/6511/10939/7416/6261/5708/3708/5718/5713/54205/6311/5705/10000/8678/5684/5717/7419/488/25814/5702/5695/5707/9519/2776/8408/7436/2905/5290/10524/6315/5710/9821/23369/5690/23130/292/11047/5693/5649/2902/2475/10105/7417/5685/5714/23236/5602/5689/5719/10213	GRIA1/GRM1/PLCB4/SPTBN2/MAPK9/SLC25A4/PSMD3/KCND3/OPA1/PIK3CB/PIK3R3/ATP2A3/PDYN/GRIA2/PIK3R4/FGF14/SLC1A6/AFG3L2/VDAC1/RYR1/PSMD2/ITPR1/PSMD12/PSMD7/CYCS/ATXN2/PSMC5/AKT3/BECN1/PSMA3/PSMD11/VDAC3/ATP2A2/ATXN10/PSMC3/PSMB7/PSMD1/TBPL1/GNAQ/ULK1/VLDLR/GRIN2C/PIK3CA/KAT5/ATXN8OS/PSMD4/RB1CC1/PUM2/PSMB2/ATG2A/SLC25A5/ADRM1/PSMB5/RELN/GRIN1/MTOR/PPIF/VDAC2/PSMA4/PSMD8/PLCB1/MAPK10/PSMB1/PSMD13/PSMD14
hsa04728	Dopaminergic synapse	115	0.512669	2.04312	0.000173883	0.000173883	0.00184416	1354	tags=28%, list=11%, signal=25%	2890/50632/5332/2785/3763/6323/6571/816/1644/2774/10681/5601/5530/408/3800/5532/7054/2891/5518/818/2782/2775/5600/55844/6531/5527/5515/3708/1812/10000/2778/5526	GRIA1/CALY/PLCB4/GNG3/KCNJ6/SCN1A/SLC18A2/CAMK2B/DDC/GNAL/GNB5/MAPK9/PPP3CA/ARRB1/KIF5C/PPP3CB/TH/GRIA2/PPP2R1A/CAMK2G/GNB1/GNAO1/MAPK11/PPP2R2D/SLC6A3/PPP2R5C/PPP2CA/ITPR1/DRD1/AKT3/GNAS/PPP2R5B
hsa04723	Retrograde endocannabinoid signaling	118	0.545973	2.17882	0.000174642	0.000174642	0.00184416	1789	tags=31%, list=15%, signal=27%	57084/2890/2911/5332/2785/3763/1268/2554/2566/10681/4719/5601/115/107/4698/4729/109/4720/2558/2891/2782/2775/5600/4704/4714/3708/4705/4706/5594/2915/4723/2166/4701/2560/3765/6300/2776	SLC17A6/GRIA1/GRM1/PLCB4/GNG3/KCNJ6/CNR1/GABRA1/GABRG2/GNB5/NDUFS1/MAPK9/ADCY9/ADCY1/NDUFA5/NDUFV2/ADCY3/NDUFS2/GABRA5/GRIA2/GNB1/GNAO1/MAPK11/NDUFA9/NDUFB8/ITPR1/NDUFA10/NDUFAB1/MAPK1/GRM5/NDUFV1/FAAH/NDUFA7/GABRB1/KCNJ9/MAPK12/GNAQ
hsa04724	Glutamatergic synapse	94	0.581368	2.24082	0.000178699	0.000178699	0.00184416	1357	tags=31%, list=12%, signal=28%	57084/2890/2911/27165/5332/2785/22941/2744/10681/6505/115/107/5530/9456/81539/2898/5532/109/2891/2782/6511/2775/3708/54407/8605/5594/2752/2778/2915	SLC17A6/GRIA1/GRM1/GLS2/PLCB4/GNG3/SHANK2/GLS/GNB5/SLC1A1/ADCY9/ADCY1/PPP3CA/HOMER1/SLC38A1/GRIK2/PPP3CB/ADCY3/GRIA2/GNB1/SLC1A6/GNAO1/ITPR1/SLC38A2/PLA2G4C/MAPK1/GLUL/GNAS/GRM5
hsa00190	Oxidative phosphorylation	85	0.576313	2.18564	0.000179147	0.000179147	0.00184416	2138	tags=42%, list=18%, signal=35%	1353/534/526/7384/5464/4719/51606/523/4698/4729/9114/4720/6389/155066/1537/4704/4714/527/535/4705/4706/54205/9377/479/7386/1337/4723/529/4701/1355/537/27068/1345/4724/4697/7385	COX11/ATP6V1G2/ATP6V1B2/UQCRC1/PPA1/NDUFS1/ATP6V1H/ATP6V1A/NDUFA5/NDUFV2/ATP6V0D1/NDUFS2/SDHA/ATP6V0E2/CYC1/NDUFA9/NDUFB8/ATP6V0C/ATP6V0A1/NDUFA10/NDUFAB1/CYCS/COX5A/ATP12A/UQCRFS1/COX6A1/NDUFV1/ATP6V1E1/NDUFA7/COX15/ATP6AP1/PPA2/COX6C/NDUFS4/NDUFA4/UQCRC2
hsa04727	GABAergic synapse	76	0.595713	2.21422	0.000180766	0.000180766	0.00184416	851	tags=28%, list=7%, signal=26%	9568/57468/27165/2785/3763/2571/6529/2554/2566/2744/2572/10681/2550/115/107/81539/23710/109/2558/2782/2775	GABBR2/SLC12A5/GLS2/GNG3/KCNJ6/GAD1/SLC6A1/GABRA1/GABRG2/GLS/GAD2/GNB5/GABBR1/ADCY9/ADCY1/SLC38A1/GABARAPL1/ADCY3/GABRA5/GNB1/GNAO1
hsa05032	Morphine addiction	76	0.530384	1.97139	0.000180766	0.000180766	0.00184416	1351	tags=30%, list=11%, signal=27%	9568/2785/3763/5141/2554/2566/10681/2550/115/107/5138/408/109/2558/5136/2782/5144/5153/2775/8622/1812/10846/2778	GABBR2/GNG3/KCNJ6/PDE4A/GABRA1/GABRG2/GNB5/GABBR1/ADCY9/ADCY1/PDE2A/ARRB1/ADCY3/GABRA5/PDE1A/GNB1/PDE4D/PDE1B/GNAO1/PDE8B/DRD1/PDE10A/GNAS
hsa04721	Synaptic vesicle cycle	64	0.6739	2.42189	0.00018379	0.00018379	0.00184416	1487	tags=44%, list=13%, signal=38%	57084/1759/6857/6616/6812/534/6571/6529/526/26052/5864/6505/51606/523/9114/155066/1173/6511/6531/1213/1212/527/535/8775/6536/6844/8218/529	SLC17A6/DNM1/SYT1/SNAP25/STXBP1/ATP6V1G2/SLC18A2/SLC6A1/ATP6V1B2/DNM3/RAB3A/SLC1A1/ATP6V1H/ATP6V1A/ATP6V0D1/ATP6V0E2/AP2M1/SLC1A6/SLC6A3/CLTC/CLTB/ATP6V0C/ATP6V0A1/NAPA/SLC6A9/VAMP2/CLTCL1/ATP6V1E1
hsa04961	Endocrine and other factor-regulated calcium reabsorption	49	0.608983	2.08652	0.000184638	0.000184638	0.00184416	1933	tags=39%, list=16%, signal=33%	1759/5332/793/6543/26052/491/115/1173/476/481/1213/1212/6546/2778/8218/477/2776/483/8766	DNM1/PLCB4/CALB1/SLC8A2/DNM3/ATP2B2/ADCY9/AP2M1/ATP1A1/ATP1B1/CLTC/CLTB/SLC8A1/GNAS/CLTCL1/ATP1A2/GNAQ/ATP1B3/RAB11A
hsa00250	Alanine, aspartate and glutamate metabolism	28	0.679662	2.05806	0.000194326	0.000194326	0.00184416	1269	tags=46%, list=11%, signal=42%	27165/2571/2805/2744/2572/440/7915/2673/435/2806/56954/2747/2752	GLS2/GAD1/GOT1/GLS/GAD2/ASNS/ALDH5A1/GFPT1/ASL/GOT2/NIT2/GLUD2/GLUL
hsa00220	Arginine biosynthesis	17	0.760666	2.03903	0.000201207	0.000201207	0.00184416	1269	tags=47%, list=11%, signal=42%	27165/2805/2744/435/2806/384/2747/2752	GLS2/GOT1/GLS/ASL/GOT2/ARG2/GLUD2/GLUL
hsa05150	Staphylococcus aureus infection	71	-0.610668	-2.36424	0.000222767	0.000222767	0.00184416	2466	tags=44%, list=21%, signal=35%	3115/715/3126/3122/4153/1675/3866/1828/3108/3117/3858/719/5340/3857/3859/6404/9103/3119/5724/3689/3113/712/3684/3683/2357/713/728/2212/2215/2213/3075	HLA-DPB1/C1R/HLA-DRB4/HLA-DRA/MBL2/CFD/KRT15/DSG1/HLA-DMA/HLA-DQA1/KRT10/C3AR1/PLG/KRT9/KRT12/SELPLG/FCGR2C/HLA-DQB1/PTAFR/ITGB2/HLA-DPA1/C1QA/ITGAM/ITGAL/FPR1/C1QB/C5AR1/FCGR2A/FCGR3B/FCGR2B/CFH
hsa04061	Viral protein interaction with cytokine and cytokine receptor	86	-0.584804	-2.33652	0.000225581	0.000225581	0.00184416	2763	tags=50%, list=23%, signal=39%	8764/57007/1237/3579/6366/6360/2829/4055/6373/6369/6357/3572/3577/6370/1232/6375/1435/6362/29949/1235/3570/4049/1234/8743/643/3588/6352/10563/1436/3569/3606/2919/6368/6363/7132/6351/1230/8795/6387/7133/3587/7852/6347	TNFRSF14/ACKR3/CCR8/CXCR2/CCL21/CCL16/XCR1/LTBR/CXCL11/CCL24/CCL13/IL6ST/CXCR1/CCL25/CCR3/XCL1/CSF1/CCL18/IL19/CCR6/IL6R/LTA/CCR5/TNFSF10/CXCR5/IL10RB/CCL5/CXCL13/CSF1R/IL6/IL18/CXCL1/CCL23/CCL19/TNFRSF1A/CCL4/CCR1/TNFRSF10B/CXCL12/TNFRSF1B/IL10RA/CXCR4/CCL2
hsa04064	NF-kappa B signaling pathway	93	-0.516564	-2.09173	0.000226296	0.000226296	0.00184416	1895	tags=40%, list=16%, signal=34%	51588/1459/6357/29760/10892/4790/5743/4616/1647/5970/7412/4049/5971/60401/3553/4615/3929/8837/330/929/3554/6850/597/3551/2919/472/5336/4067/8915/6363/596/7128/55367/7132/6351/6387/23643	PIAS4/CSNK2A2/CCL13/BLNK/MALT1/NFKB1/PTGS2/GADD45B/GADD45A/RELA/VCAM1/LTA/RELB/EDA2R/IL1B/MYD88/LBP/CFLAR/BIRC3/CD14/IL1R1/SYK/BCL2A1/IKBKB/CXCL1/ATM/PLCG2/LYN/BCL10/CCL19/BCL2/TNFAIP3/PIDD1/TNFRSF1A/CCL4/CXCL12/LY96
hsa03010	Ribosome	98	-0.501342	-2.04964	0.00022748	0.00022748	0.00184416	2528	tags=52%, list=21%, signal=41%	51023/6208/6171/6230/6165/51021/6232/9553/9045/51121/6164/6203/6229/6201/6155/6227/6136/6234/6188/6167/6235/6217/2197/6156/7311/6175/6218/6233/6176/11224/6128/25873/51065/6193/6141/64963/6152/6170/29074/6169/140801/6143/6146/6135/6210/6223/6205/6157/6166/6159/6192	MRPS18C/RPS14/RPL41/RPS25/RPL35A/MRPS16/RPS27/MRPL33/RPL14/RPL26L1/RPL34/RPS9/RPS24/RPS7/RPL27/RPS21/RPL12/RPS28/RPS3/RPL37/RPS29/RPS16/FAU/RPL30/UBA52/RPLP0/RPS17/RPS27A/RPLP1/RPL35/RPL6/RPL36/RPS27L/RPS5/RPL18/MRPS11/RPL24/RPL39/MRPL18/RPL38/RPL10L/RPL19/RPL22/RPL11/RPS15A/RPS19/RPS11/RPL27A/RPL36AL/RPL29/RPS4Y1
hsa05145	Toxoplasmosis	102	-0.436325	-1.79848	0.000228102	0.000228102	0.00184416	2503	tags=38%, list=21%, signal=30%	1432/3115/3655/6774/3126/959/572/208/3122/23533/3688/842/3915/2773/4790/3108/3117/10319/5970/1234/3911/4615/7097/330/3588/3459/3460/841/3551/3119/240/596/3113/7132/3910/3310/3305/3587/23643	MAPK14/HLA-DPB1/ITGA6/STAT3/HLA-DRB4/CD40LG/BAD/AKT2/HLA-DRA/PIK3R5/ITGB1/CASP9/LAMC1/GNAI3/NFKB1/HLA-DMA/HLA-DQA1/LAMC3/RELA/CCR5/LAMA5/MYD88/TLR2/BIRC3/IL10RB/IFNGR1/IFNGR2/CASP8/IKBKB/HLA-DQB1/ALOX5/BCL2/HLA-DPA1/TNFRSF1A/LAMA4/HSPA6/HSPA1L/IL10RA/LY96
hsa04380	Osteoclast differentiation	123	-0.424303	-1.79534	0.000238607	0.000238607	0.00184416	2151	tags=36%, list=18%, signal=30%	3456/208/653361/2355/2354/3726/4982/5293/29760/11006/8061/1435/3454/4790/4688/5970/5971/3553/5609/10379/54/11027/3459/3554/1436/6850/3460/2353/23547/1535/7305/3551/7048/9103/5336/3725/6688/54209/7132/3937/2212/2215/4689/2213	IFNB1/AKT2/NCF1/FOSL2/FOSB/JUNB/TNFRSF11B/PIK3CD/BLNK/LILRB4/FOSL1/CSF1/IFNAR1/NFKB1/NCF2/RELA/RELB/IL1B/MAP2K7/IRF9/ACP5/LILRA2/IFNGR1/IL1R1/CSF1R/SYK/IFNGR2/FOS/LILRA4/CYBA/TYROBP/IKBKB/TGFBR2/FCGR2C/PLCG2/JUN/SPI1/TREM2/TNFRSF1A/LCP2/FCGR2A/FCGR3B/NCF4/FCGR2B
hsa05162	Measles	128	-0.448471	-1.90699	0.000239406	0.000239406	0.00184416	2562	tags=38%, list=22%, signal=30%	3661/915/3441/5295/7157/6774/30835/572/3456/208/317/842/1459/5293/9134/3454/4790/5970/1965/3553/4615/8667/4478/595/10379/7097/4938/6776/3440/868/4600/2353/841/3569/3551/1021/3725/578/355/898/596/64135/7128/51284/3310/3305/3665/2213	IRF3/CD3D/IFNA4/PIK3R1/TP53/STAT3/CD209/BAD/IFNB1/AKT2/APAF1/CASP9/CSNK2A2/PIK3CD/CCNE2/IFNAR1/NFKB1/RELA/EIF2S1/IL1B/MYD88/EIF3H/MSN/CCND1/IRF9/TLR2/OAS1/STAT5A/IFNA2/CBLB/MX2/FOS/CASP8/IL6/IKBKB/CDK6/JUN/BAK1/FAS/CCNE1/BCL2/IFIH1/TNFAIP3/TLR7/HSPA6/HSPA1L/IRF7/FCGR2B
hsa05152	Tuberculosis	161	-0.384726	-1.68989	0.000246731	0.000246731	0.00184416	2503	tags=35%, list=21%, signal=28%	1432/3441/3115/5894/3126/30835/8877/572/3456/208/9902/3122/64127/26253/317/842/3916/10892/64581/91860/4790/3108/3117/5970/3553/4360/4615/3929/7097/3440/929/3588/51806/3459/6850/3460/841/3569/3329/3606/9103/3119/8767/8915/3689/10312/2207/596/3113/1051/3684/7132/2212/2215/1520/3587/2213	MAPK14/IFNA4/HLA-DPB1/RAF1/HLA-DRB4/CD209/SPHK1/BAD/IFNB1/AKT2/MRC2/HLA-DRA/NOD2/CLEC4E/APAF1/CASP9/LAMP1/MALT1/CLEC7A/CALML4/NFKB1/HLA-DMA/HLA-DQA1/RELA/IL1B/MRC1/MYD88/LBP/TLR2/IFNA2/CD14/IL10RB/CALML5/IFNGR1/SYK/IFNGR2/CASP8/IL6/HSPD1/IL18/FCGR2C/HLA-DQB1/RIPK2/BCL10/ITGB2/TCIRG1/FCER1G/BCL2/HLA-DPA1/CEBPB/ITGAM/TNFRSF1A/FCGR2A/FCGR3B/CTSS/IL10RA/FCGR2B
hsa05130	Pathogenic Escherichia coli infection	169	-0.369535	-1.63403	0.000247036	0.000247036	0.00184416	1578	tags=28%, list=13%, signal=25%	4643/6188/5062/2846/9181/4790/347733/27128/23562/9632/5970/837/4641/3553/4615/1902/4646/8743/84617/2149/1364/10163/10802/8440/3554/4542/2353/841/3569/3606/2768/3551/9871/3725/578/355/24146/840/7456/4642/6093/7132/834/2212/4629/8795/10095/7100	MYO1E/RPS3/PAK2/LPAR4/ARHGEF2/NFKB1/TUBB2B/CYTH4/CLDN14/SEC24C/RELA/CASP4/MYO1C/IL1B/MYD88/LPAR1/MYO6/TNFSF10/TUBB6/F2R/CLDN4/WASF2/SEC24A/NCK2/IL1R1/MYO1F/FOS/CASP8/IL6/IL18/GNA12/IKBKB/SEC24D/JUN/BAK1/FAS/CLDN15/CASP7/WIPF1/MYO1D/ROCK1/TNFRSF1A/CASP1/FCGR2A/MYH11/TNFRSF10B/ARPC1B/TLR5
hsa05164	Influenza A	156	-0.429982	-1.88032	0.000247097	0.000247097	0.00184416	2811	tags=40%, list=24%, signal=31%	896/3593/8106/91543/8480/29108/5578/3661/3441/3115/7514/5894/5295/3126/3456/208/3122/11100/55916/317/842/5293/10241/3454/4790/3108/3117/5645/5970/29107/1965/79671/3553/5340/4615/8743/10379/4938/3440/7098/6352/3459/3460/4600/841/3569/3606/3551/3119/1021/578/355/3113/64135/5611/7132/834/51284/3665/8795/3337/6347	CCND3/IL12B/PABPN1/RSAD2/RAE1/PYCARD/PRKCA/IRF3/IFNA4/HLA-DPB1/XPO1/RAF1/PIK3R1/HLA-DRB4/IFNB1/AKT2/HLA-DRA/HNRNPUL1/NXT2/APAF1/CASP9/PIK3CD/CALCOCO2/IFNAR1/NFKB1/HLA-DMA/HLA-DQA1/PRSS2/RELA/NXT1/EIF2S1/NLRX1/IL1B/PLG/MYD88/TNFSF10/IRF9/OAS1/IFNA2/TLR3/CCL5/IFNGR1/IFNGR2/MX2/CASP8/IL6/IL18/IKBKB/HLA-DQB1/CDK6/BAK1/FAS/HLA-DPA1/IFIH1/DNAJC3/TNFRSF1A/CASP1/TLR7/IRF7/TNFRSF10B/DNAJB1/CCL2
hsa05202	Transcriptional misregulation in cancer	159	-0.382817	-1.6762	0.000247831	0.000247831	0.00184416	2041	tags=30%, list=17%, signal=25%	4066/1031/466/4149/904/5077/7850/1848/7403/4790/4616/1647/2119/4193/5970/727837/4005/8864/4291/1991/2321/5079/942/30012/330/929/5327/26471/2530/3065/1436/597/3569/4299/4208/6929/7048/472/578/890/6688/1051/2138/3684/4094/1050/1026	LYL1/CDKN2C/ATF1/MAX/CCNT1/PAX3/IL1R2/DUSP6/KDM6A/NFKB1/GADD45B/GADD45A/ETV5/MDM2/RELA/SSX2B/LMO2/PER2/MLF1/ELANE/FLT1/PAX5/CD86/TLX3/BIRC3/CD14/PLAT/NUPR1/FUT8/HDAC1/CSF1R/BCL2A1/IL6/AFF1/MEF2C/TCF3/TGFBR2/ATM/BAK1/CCNA2/SPI1/CEBPB/EYA1/ITGAM/MAF/CEBPA/CDKN1A
hsa04062	Chemokine signaling pathway	167	-0.356183	-1.57223	0.000248447	0.000248447	0.00184416	2451	tags=34%, list=21%, signal=27%	6366/5908/6360/5894/2829/5295/6774/572/208/23533/5906/653361/6373/6369/6357/5293/4893/2788/3577/6370/1232/6375/2773/6362/4790/6655/5568/7409/1235/5970/6464/1234/2791/5829/643/7454/6352/10563/2787/3551/2919/5336/4067/2268/6368/6363/5880/2870/6093/3055/6351/1230/6387/1794/113/7852/6347	CCL21/RAP1B/CCL16/RAF1/XCR1/PIK3R1/STAT3/BAD/AKT2/PIK3R5/RAP1A/NCF1/CXCL11/CCL24/CCL13/PIK3CD/NRAS/GNG7/CXCR1/CCL25/CCR3/XCL1/GNAI3/CCL18/NFKB1/SOS2/PRKACG/VAV1/CCR6/RELA/SHC1/CCR5/GNG11/PXN/CXCR5/WAS/CCL5/CXCL13/GNG5/IKBKB/CXCL1/PLCG2/LYN/FGR/CCL23/CCL19/RAC2/GRK6/ROCK1/HCK/CCL4/CCR1/CXCL12/DOCK2/ADCY7/CXCR4/CCL2
hsa05167	Kaposi sarcoma-associated herpesvirus infection	176	-0.396037	-1.76084	0.000249314	0.000249314	0.00184416	2671	tags=41%, list=23%, signal=32%	4772/1237/3661/5335/1432/3441/5894/5295/440738/7157/6774/5925/6934/3105/3456/208/23533/7422/3133/842/5293/2247/4893/3572/2788/1232/3709/91860/3454/7538/4790/5743/7311/5155/4775/5970/1234/6233/2791/5609/595/10379/9261/942/3440/7098/100507436/51806/2787/3459/6850/2353/841/3569/285/3551/2919/5336/1021/4067/3725/578/355/6932/4277/51176/3055/7132/1230/3665/1026/9976	NFATC1/CCR8/IRF3/PLCG1/MAPK14/IFNA4/RAF1/PIK3R1/MAP1LC3C/TP53/STAT3/RB1/TCF7L2/HLA-A/IFNB1/AKT2/PIK3R5/VEGFA/HLA-E/CASP9/PIK3CD/FGF2/NRAS/IL6ST/GNG7/CCR3/ITPR2/CALML4/IFNAR1/ZFP36/NFKB1/PTGS2/UBA52/PDGFB/NFATC3/RELA/CCR5/RPS27A/GNG11/MAP2K7/CCND1/IRF9/MAPKAPK2/CD86/IFNA2/TLR3/MICA/CALML5/GNG5/IFNGR1/SYK/FOS/CASP8/IL6/ANGPT2/IKBKB/CXCL1/PLCG2/CDK6/LYN/JUN/BAK1/FAS/TCF7/MICB/LEF1/HCK/TNFRSF1A/CCR1/…
hsa04510	Focal adhesion	185	-0.354625	-1.58742	0.000253357	0.000253357	0.00184416	3043	tags=40%, list=26%, signal=30%	3912/1499/7414/1297/1287/4633/896/1311/2317/5578/7058/7143/8515/5908/5894/1280/2335/3655/5295/7057/3676/7148/572/2324/208/5923/5906/10298/29895/3688/858/7422/1729/3672/5293/3082/3915/5062/81/1299/6655/7409/859/5155/10319/4636/6464/3678/2316/3911/4659/3693/595/1278/5228/2318/2321/5829/1284/5499/330/2064/56034/857/10627/3725/7094/5728/596/5880/1282/6093/3910/10398	LAMB1/CTNNB1/VCL/COL9A1/COL4A5/MYL2/CCND3/COMP/FLNB/PRKCA/THBS2/TNR/ITGA10/RAP1B/RAF1/COL2A1/FN1/ITGA6/PIK3R1/THBS1/ITGA4/TNXB/BAD/FLT4/AKT2/RASGRF1/RAP1A/PAK4/MYLPF/ITGB1/CAV2/VEGFA/DIAPH1/ITGA1/PIK3CD/HGF/LAMC1/PAK2/ACTN4/COL9A3/SOS2/VAV1/CAV3/PDGFB/LAMC3/MYL5/SHC1/ITGA5/FLNA/LAMA5/PPP1R12A/ITGB5/CCND1/COL1A2/PGF/FLNC/FLT1/PXN/COL4A2/PPP1CA/BIRC3/ERBB2/PDGFC/CAV1/MYL12A/JUN/TLN1/PTEN/BCL2/RAC2/…
hsa05417	Lipid and atherosclerosis	192	-0.408502	-1.83723	0.000254518	0.000254518	0.00184416	2622	tags=42%, list=22%, signal=33%	29108/19/6403/1548/5578/3661/5451/5335/1432/3441/5908/839/5295/7157/6774/3309/959/572/3456/208/10010/5906/653361/25833/317/842/3308/5293/4893/4217/3320/338/91860/4790/4688/7409/4775/4780/5970/7412/1965/6401/3553/468/4615/5609/4973/3929/8743/7097/3440/929/6352/51806/2353/841/3569/3329/3606/1535/1536/3551/1573/2919/4067/3725/355/596/840/7132/834/7184/3310/22926/3305/3665/8795/4689/6347/23643	PYCARD/ABCA1/SELP/CYP2A6/PRKCA/IRF3/POU2F1/PLCG1/MAPK14/IFNA4/RAP1B/CASP6/PIK3R1/TP53/STAT3/HSPA5/CD40LG/BAD/IFNB1/AKT2/TANK/RAP1A/NCF1/POU2F3/APAF1/CASP9/HSPA4/PIK3CD/NRAS/MAP3K5/HSP90AA1/APOB/CALML4/NFKB1/NCF2/VAV1/NFATC3/NFE2L2/RELA/VCAM1/EIF2S1/SELE/IL1B/ATF4/MYD88/MAP2K7/OLR1/LBP/TNFSF10/TLR2/IFNA2/CD14/CCL5/CALML5/FOS/CASP8/IL6/HSPD1/IL18/CYBA/CYBB/IKBKB/CYP2J2/CXCL1/LYN/JUN/FAS/BCL2/CASP7/…
hsa05171	Coronavirus disease - COVID-19	200	-0.504953	-2.28917	0.000255493	0.000255493	0.00184416	2652	tags=48%, list=23%, signal=38%	6868/730/6403/4142/5578/3661/5335/6208/1432/3441/6171/6230/715/5295/6774/6165/6232/3456/9045/51121/6164/4153/6203/6229/6201/1675/6155/5293/6227/3572/6136/6234/6188/6167/735/6235/3454/4790/6217/2197/6156/7311/3570/5970/1839/6175/6218/6233/6176/719/11224/6128/3553/4615/25873/51065/6193/10379/7097/4938/6141/6152/8829/3440/7098/6170/6169/9636/6850/140801/4600/2353/3569/6143/6146/1536/3551/5336/6135/6…	ADAM17/C7/SELP/MAS1/PRKCA/IRF3/PLCG1/RPS14/MAPK14/IFNA4/RPL41/RPS25/C1R/PIK3R1/STAT3/RPL35A/RPS27/IFNB1/RPL14/RPL26L1/RPL34/MBL2/RPS9/RPS24/RPS7/CFD/RPL27/PIK3CD/RPS21/IL6ST/RPL12/RPS28/RPS3/RPL37/C9/RPS29/IFNAR1/NFKB1/RPS16/FAU/RPL30/UBA52/IL6R/RELA/HBEGF/RPLP0/RPS17/RPS27A/RPLP1/C3AR1/RPL35/RPL6/IL1B/MYD88/RPL36/RPS27L/RPS5/IRF9/TLR2/OAS1/RPL18/RPL24/NRP1/IFNA2/TLR3/RPL39/RPL38/ISG15/SYK/RPL10L…
hsa04713	Circadian entrainment	83	0.480425	1.81195	0.000358938	0.000358938	0.00235768	1351	tags=27%, list=11%, signal=24%	2890/5332/2785/3763/816/10681/116/115/107/8911/109/6262/2891/818/2782/2775/6261/3708/8913/5594/9252/2778	GRIA1/PLCB4/GNG3/KCNJ6/CAMK2B/GNB5/ADCYAP1/ADCY9/ADCY1/CACNA1I/ADCY3/RYR2/GRIA2/CAMK2G/GNB1/GNAO1/RYR1/ITPR1/CACNA1G/MAPK1/RPS6KA5/GNAS
hsa04260	Cardiac muscle contraction	70	0.510807	1.86825	0.00036324	0.00036324	0.00235768	1855	tags=33%, list=16%, signal=28%	55799/6543/784/7384/10479/9254/489/6262/1537/10368/476/481/444/6546/9377/7386/1337/477/488/10369/6548/483/782	CACNA2D3/SLC8A2/CACNB3/UQCRC1/SLC9A6/CACNA2D2/ATP2A3/RYR2/CYC1/CACNG3/ATP1A1/ATP1B1/ASPH/SLC8A1/COX5A/UQCRFS1/COX6A1/ATP1A2/ATP2A2/CACNG2/SLC9A1/ATP1B3/CACNB1
hsa00562	Inositol phosphate metabolism	65	0.529775	1.90853	0.000367444	0.000367444	0.00235768	1570	tags=31%, list=13%, signal=27%	5332/8867/3631/5297/22876/4952/5291/8821/23396/8395/9110/23007/3705/51477/3612/7167/27124/9896/55361/5287	PLCB4/SYNJ1/INPP4A/PI4KA/INPP5F/OCRL/PIK3CB/INPP4B/PIP5K1C/PIP5K1B/MTMR4/PLCH1/ITPK1/ISYNA1/IMPA1/TPI1/INPP5J/FIG4/PI4K2A/PIK3C2B
hsa05033	Nicotine addiction	31	0.658428	2.03979	0.000383803	0.000383803	0.00235768	657	tags=19%, list=6%, signal=18%	57084/2890/2554/2566/2558/2891	SLC17A6/GRIA1/GABRA1/GABRG2/GABRA5/GRIA2
hsa00020	Citrate cycle (TCA cycle)	30	0.644843	1.97947	0.000387222	0.000387222	0.00235768	1733	tags=57%, list=15%, signal=48%	55753/4190/47/50/1431/8803/6389/3419/1738/3420/5162/4191/3421/1737/3418/2271/5160	OGDHL/MDH1/ACLY/ACO2/CS/SUCLA2/SDHA/IDH3A/DLD/IDH3B/PDHB/MDH2/IDH3G/DLAT/IDH2/FH/PDHA1
hsa05321	Inflammatory bowel disease	59	-0.528185	-1.97048	0.00043611	0.00043611	0.00235768	3062	tags=58%, list=26%, signal=43%	50616/6095/59067/51561/3594/3593/4772/3115/3605/6774/3126/6778/3122/64127/3596/4790/3108/4088/3117/50615/5970/3553/7097/3595/3459/3460/3569/3606/3119/3725/3113/3566/4094/7100	IL22/RORA/IL21/IL23A/IL12RB1/IL12B/NFATC1/HLA-DPB1/IL17A/STAT3/HLA-DRB4/STAT6/HLA-DRA/NOD2/IL13/NFKB1/HLA-DMA/SMAD3/HLA-DQA1/IL21R/RELA/IL1B/TLR2/IL12RB2/IFNGR1/IFNGR2/IL6/IL18/HLA-DQB1/JUN/HLA-DPA1/IL4R/MAF/TLR5
hsa04612	Antigen processing and presentation	64	-0.493866	-1.87327	0.0004385	0.0004385	0.00235768	3792	tags=62%, list=32%, signal=43%	6892/3106/1514/3107/3135/3109/6891/4261/925/3134/4802/5994/3824/6890/57292/1508/3115/3309/3126/3105/567/3122/3133/3308/5641/3811/3320/920/3804/3108/3805/3117/811/2923/3823/3119/3113/3310/3305/1520	TAPBP/HLA-B/CTSL/HLA-C/HLA-G/HLA-DMB/TAP2/CIITA/CD8A/HLA-F/NFYC/RFXAP/KLRD1/TAP1/KIR2DL5A/CTSB/HLA-DPB1/HSPA5/HLA-DRB4/HLA-A/B2M/HLA-DRA/HLA-E/HSPA4/LGMN/KIR3DL1/HSP90AA1/CD4/KIR2DL3/HLA-DMA/KIR2DL4/HLA-DQA1/CALR/PDIA3/KLRC3/HLA-DQB1/HLA-DPA1/HSPA6/HSPA1L/CTSS
hsa05133	Pertussis	65	-0.483182	-1.83895	0.000438693	0.000438693	0.00235768	1565	tags=34%, list=13%, signal=30%	2773/3394/91860/4790/5970/3678/3553/4615/10392/929/51806/3659/2353/3569/3725/3689/840/712/3684/834/713/23643	GNAI3/IRF8/CALML4/NFKB1/RELA/ITGA5/IL1B/MYD88/NOD1/CD14/CALML5/IRF1/FOS/IL6/JUN/ITGB2/CASP7/C1QA/ITGAM/CASP1/C1QB/LY96
hsa05140	Leishmaniasis	70	-0.470408	-1.81829	0.00044484	0.00044484	0.00235768	2503	tags=43%, list=21%, signal=34%	1432/3115/3126/3676/3122/653361/3688/4790/3108/4688/5743/3117/5970/3553/4615/7097/3459/3460/2353/1535/1536/9103/3119/3725/3689/3113/3684/2212/2215/4689	MAPK14/HLA-DPB1/HLA-DRB4/ITGA4/HLA-DRA/NCF1/ITGB1/NFKB1/HLA-DMA/NCF2/PTGS2/HLA-DQA1/RELA/IL1B/MYD88/TLR2/IFNGR1/IFNGR2/FOS/CYBA/CYBB/FCGR2C/HLA-DQB1/JUN/ITGB2/HLA-DPA1/ITGAM/FCGR2A/FCGR3B/NCF4
hsa04610	Complement and coagulation cascades	79	-0.467712	-1.83989	0.000451365	0.000451365	0.00235768	1906	tags=25%, list=16%, signal=21%	4153/2/1675/5329/735/7056/719/2151/5340/2149/5327/3689/712/3684/713/728/2162/11326/3075/5265	MBL2/A2M/CFD/PLAUR/C9/THBD/C3AR1/F2RL2/PLG/F2R/PLAT/ITGB2/C1QA/ITGAM/C1QB/C5AR1/F13A1/VSIG4/CFH/SERPINA1
hsa04659	Th17 cell differentiation	98	-0.424611	-1.73594	0.000454959	0.000454959	0.00235768	3141	tags=49%, list=27%, signal=36%	4794/6256/27040/50616/6095/59067/917/51561/3594/4772/915/5335/1432/3115/3605/6774/3126/6778/3122/3556/10148/3572/3320/920/4790/3108/4088/3117/4775/3570/50615/5970/3553/6776/919/3459/3554/3460/2353/3569/196/3551/7048/3119/3725/3113/3566/9466	NFKBIE/RXRA/LAT/IL22/RORA/IL21/CD3G/IL23A/IL12RB1/NFATC1/CD3D/PLCG1/MAPK14/HLA-DPB1/IL17A/STAT3/HLA-DRB4/STAT6/HLA-DRA/IL1RAP/EBI3/IL6ST/HSP90AA1/CD4/NFKB1/HLA-DMA/SMAD3/HLA-DQA1/NFATC3/IL6R/IL21R/RELA/IL1B/STAT5A/CD247/IFNGR1/IL1R1/IFNGR2/FOS/IL6/AHR/IKBKB/TGFBR2/HLA-DQB1/JUN/HLA-DPA1/IL4R/IL27RA
hsa05418	Fluid shear stress and atherosclerosis	128	-0.393152	-1.67176	0.000478813	0.000478813	0.0023999	1920	tags=34%, list=16%, signal=29%	858/7422/51588/7850/5293/4217/1906/3320/4313/9181/91860/4790/7056/4688/859/5175/5155/5563/4780/658/5970/7412/6401/3553/5609/1003/10365/4258/5327/51806/3554/2353/857/1535/4208/3551/1728/3725/596/5880/7132/7184/3162/6347	CAV2/VEGFA/PIAS4/IL1R2/PIK3CD/MAP3K5/EDN1/HSP90AA1/MMP2/ARHGEF2/CALML4/NFKB1/THBD/NCF2/CAV3/PECAM1/PDGFB/PRKAA2/NFE2L2/BMPR1B/RELA/VCAM1/SELE/IL1B/MAP2K7/CDH5/KLF2/MGST2/PLAT/CALML5/IL1R1/FOS/CAV1/CYBA/MEF2C/IKBKB/NQO1/JUN/BCL2/RAC2/TNFRSF1A/HSP90B1/HMOX1/CCL2
hsa04141	Protein processing in endoplasmic reticulum	140	-0.388255	-1.67033	0.000486855	0.000486855	0.0023999	1811	tags=27%, list=15%, signal=23%	6748/10952/10130/4217/9709/3320/7321/23480/6746/4780/9632/1965/7323/6238/1603/468/5609/1410/811/3301/10802/10808/2923/9871/51128/578/596/9601/5611/51009/7184/4121/3310/22926/3305/64374/3300/3337	SSR4/SEC61B/PDIA6/MAP3K5/HERPUD1/HSP90AA1/UBE2D1/SEC61G/SSR2/NFE2L2/SEC24C/EIF2S1/UBE2D3/RRBP1/DAD1/ATF4/MAP2K7/CRYAB/CALR/DNAJA1/SEC24A/HSPH1/PDIA3/SEC24D/SAR1B/BAK1/BCL2/PDIA4/DNAJC3/DERL2/HSP90B1/MAN1A1/HSPA6/ATF6/HSPA1L/SIL1/DNAJB2/DNAJB1
hsa05169	Epstein-Barr virus infection	190	-0.340832	-1.53129	0.000508388	0.000508388	0.00244638	2718	tags=36%, list=23%, signal=28%	930/6890/22938/3661/915/1432/3441/3115/5295/7157/6774/5925/3126/3105/3456/208/567/3122/317/3133/842/5293/29760/9134/3454/4790/3108/4616/1647/3117/4193/5970/5971/4615/5609/595/10379/811/7097/4938/919/3440/3065/9636/6850/841/7431/2923/3569/6502/3551/5336/3119/1021/4067/864/3725/953/578/355/890/898/596/3113/7128/3683/3665/1026	CD19/TAP1/SNW1/IRF3/CD3D/MAPK14/IFNA4/HLA-DPB1/PIK3R1/TP53/STAT3/RB1/HLA-DRB4/HLA-A/IFNB1/AKT2/B2M/HLA-DRA/APAF1/HLA-E/CASP9/PIK3CD/BLNK/CCNE2/IFNAR1/NFKB1/HLA-DMA/GADD45B/GADD45A/HLA-DQA1/MDM2/RELA/RELB/MYD88/MAP2K7/CCND1/IRF9/CALR/TLR2/OAS1/CD247/IFNA2/HDAC1/ISG15/SYK/CASP8/VIM/PDIA3/IL6/SKP2/IKBKB/PLCG2/HLA-DQB1/CDK6/LYN/RUNX3/JUN/ENTPD1/BAK1/FAS/CCNA2/CCNE1/BCL2/HLA-DPA1/TNFAIP3/ITGAL/IRF7/CD…
hsa05322	Systemic lupus erythematosus	45	-0.532268	-1.87504	0.000646691	0.000646691	0.0029554	3671	tags=58%, list=31%, signal=40%	716/2209/3109/958/2903/729/730/3115/715/3126/959/3122/1511/735/81/3108/3117/6634/1991/942/3119/3113/712/713/2212/2215	C1S/FCGR1A/HLA-DMB/CD40/GRIN2A/C6/C7/HLA-DPB1/C1R/HLA-DRB4/CD40LG/HLA-DRA/CTSG/C9/ACTN4/HLA-DMA/HLA-DQA1/SNRPD3/ELANE/CD86/HLA-DQB1/HLA-DPA1/C1QA/C1QB/FCGR2A/FCGR3B
hsa05134	Legionellosis	50	-0.517903	-1.86633	0.000655022	0.000655022	0.0029554	1875	tags=46%, list=16%, signal=39%	57396/317/842/4790/5970/3553/4615/7097/929/841/3569/3329/3606/2919/1195/51128/3689/840/3684/834/3310/3305/7100	CLK4/APAF1/CASP9/NFKB1/RELA/IL1B/MYD88/TLR2/CD14/CASP8/IL6/HSPD1/IL18/CXCL1/CLK1/SAR1B/ITGB2/CASP7/ITGAM/CASP1/HSPA6/HSPA1L/TLR5
hsa05221	Acute myeloid leukemia	65	-0.457394	-1.7408	0.000658039	0.000658039	0.0029554	2374	tags=43%, list=20%, signal=35%	5894/3562/5295/6774/6934/572/208/5293/4893/1848/4790/6655/5970/8864/595/6776/929/1436/597/3551/890/5292/6688/6932/51176/3684/1978/1050	RAF1/IL3/PIK3R1/STAT3/TCF7L2/BAD/AKT2/PIK3CD/NRAS/DUSP6/NFKB1/SOS2/RELA/PER2/CCND1/STAT5A/CD14/CSF1R/BCL2A1/IKBKB/CCNA2/PIM1/SPI1/TCF7/LEF1/ITGAM/EIF4EBP1/CEBPA
hsa05222	Small cell lung cancer	91	-0.427214	-1.72223	0.000681973	0.000681973	0.00299631	2360	tags=38%, list=20%, signal=31%	2335/3655/5295/7157/5925/208/4149/3688/317/842/1163/5293/3915/9134/4790/5743/4616/1647/10319/5970/3911/595/9618/1284/330/6502/3551/1021/578/5728/898/596/1282/3910/1026	FN1/ITGA6/PIK3R1/TP53/RB1/AKT2/MAX/ITGB1/APAF1/CASP9/CKS1B/PIK3CD/LAMC1/CCNE2/NFKB1/PTGS2/GADD45B/GADD45A/LAMC3/RELA/LAMA5/CCND1/TRAF4/COL4A2/BIRC3/SKP2/IKBKB/CDK6/BAK1/PTEN/CCNE1/BCL2/COL4A1/LAMA4/CDKN1A
hsa04650	Natural killer cell mediated cytotoxicity	111	-0.404101	-1.68428	0.000697999	0.000697999	0.00300147	2671	tags=37%, list=23%, signal=29%	4772/57292/5578/5335/3441/5894/5295/259197/3105/3456/3133/5293/4893/3811/3454/3804/6655/7409/962/6464/8743/919/3440/100507436/3459/6850/3460/3823/7305/5336/355/3689/2207/5880/5551/4277/3384/3683/3937/2215/8795	NFATC1/KIR2DL5A/PRKCA/PLCG1/IFNA4/RAF1/PIK3R1/NCR3/HLA-A/IFNB1/HLA-E/PIK3CD/NRAS/KIR3DL1/IFNAR1/KIR2DL3/SOS2/VAV1/CD48/SHC1/TNFSF10/CD247/IFNA2/MICA/IFNGR1/SYK/IFNGR2/KLRC3/TYROBP/PLCG2/FAS/ITGB2/FCER1G/RAC2/PRF1/MICB/ICAM2/ITGAL/LCP2/FCGR3B/TNFRSF10B
hsa04621	NOD-like receptor signaling pathway	146	-0.381522	-1.65513	0.000733317	0.000733317	0.00303838	1576	tags=26%, list=13%, signal=23%	3709/3320/10135/3454/4790/5970/79671/837/3553/4615/10392/140609/5585/10379/4938/330/3440/9140/6352/841/3569/3606/838/1535/1536/3551/2919/8767/3725/3428/596/7128/834/2634/5027/3665/2633/6347	ITPR2/HSP90AA1/NAMPT/IFNAR1/NFKB1/RELA/NLRX1/CASP4/IL1B/MYD88/NOD1/NEK7/PKN1/IRF9/OAS1/BIRC3/IFNA2/ATG12/CCL5/CASP8/IL6/IL18/CASP5/CYBA/CYBB/IKBKB/CXCL1/RIPK2/JUN/IFI16/BCL2/TNFAIP3/CASP1/GBP2/P2RX7/IRF7/GBP1/CCL2
hsa04742	Taste transduction	60	0.528507	1.87781	0.000736648	0.000736648	0.00303838	3175	tags=47%, list=27%, signal=34%	9568/2911/5332/2554/2550/6328/2558/5136/5153/50832/2555/50839/10021/40/5567/51764/5028/2557/114/6335/23236/2914/50833/3359/6326/3354/5024/3355	GABBR2/GRM1/PLCB4/GABRA1/GABBR1/SCN3A/GABRA5/PDE1A/PDE1B/TAS2R4/GABRA2/TAS2R10/HCN4/ASIC2/PRKACB/GNG13/P2RY1/GABRA4/ADCY8/SCN9A/PLCB1/GRM4/TAS2R16/HTR3A/SCN2A/HTR1E/P2RX3/HTR1F
hsa04911	Insulin secretion	74	0.477856	1.76743	0.000904159	0.000904159	0.00353974	831	tags=22%, list=7%, signal=20%	6616/5332/885/11069/816/5864/116/115/107/27445/9699/109/6262/818/476/481	SNAP25/PLCB4/CCK/RAPGEF4/CAMK2B/RAB3A/ADCYAP1/ADCY9/ADCY1/PCLO/RIMS2/ADCY3/RYR2/CAMK2G/ATP1A1/ATP1B1
hsa05215	Prostate cancer	92	-0.421911	-1.704	0.000909918	0.000909918	0.00353974	2374	tags=37%, list=20%, signal=30%	5894/5295/7157/5925/6934/572/208/842/7850/5293/4893/3320/9134/4790/6655/2119/5155/4193/5970/468/595/2064/5327/90993/56034/3551/5728/898/596/6932/64764/51176/7184/1026	RAF1/PIK3R1/TP53/RB1/TCF7L2/BAD/AKT2/CASP9/IL1R2/PIK3CD/NRAS/HSP90AA1/CCNE2/NFKB1/SOS2/ETV5/PDGFB/MDM2/RELA/ATF4/CCND1/ERBB2/PLAT/CREB3L1/PDGFC/IKBKB/PTEN/CCNE1/BCL2/TCF7/CREB3L2/LEF1/HSP90B1/CDKN1A
hsa04670	Leukocyte transendothelial migration	99	-0.412517	-1.692	0.000910747	0.000910747	0.00353974	2574	tags=42%, list=22%, signal=33%	5578/5335/1432/5908/5295/3676/5906/653361/29895/3688/5293/2773/4313/81/4688/7409/5175/23562/4636/7412/4478/4267/5829/1003/1364/399/50848/10627/1535/1536/5336/3689/5880/24146/3684/3683/6093/58494/10398/6387/4689/7852	PRKCA/PLCG1/MAPK14/RAP1B/PIK3R1/ITGA4/RAP1A/NCF1/MYLPF/ITGB1/PIK3CD/GNAI3/MMP2/ACTN4/NCF2/VAV1/PECAM1/CLDN14/MYL5/VCAM1/MSN/CD99/PXN/CDH5/CLDN4/RHOH/F11R/MYL12A/CYBA/CYBB/PLCG2/ITGB2/RAC2/CLDN15/ITGAM/ITGAL/ROCK1/JAM2/MYL9/CXCL12/NCF4/CXCR4
hsa05206	MicroRNAs in cancer	147	-0.37763	-1.63963	0.000979192	0.000979192	0.00373396	2574	tags=36%, list=22%, signal=29%	5578/6768/5335/4854/7143/5243/5894/5295/7157/6774/7057/7148/7168/6659/10298/7422/5293/9839/4893/1788/9134/4790/4853/6655/5743/5155/4193/6464/9493/3678/900/54541/595/2064/3065/7431/3551/472/5336/1021/578/5292/5728/23405/898/4851/596/4170/6093/1945/1942/3162/1026	PRKCA/ST14/PLCG1/NOTCH3/TNR/ABCB1/RAF1/PIK3R1/TP53/STAT3/THBS1/TNXB/TPM1/SOX4/PAK4/VEGFA/PIK3CD/ZEB2/NRAS/DNMT3A/CCNE2/NFKB1/NOTCH2/SOS2/PTGS2/PDGFB/MDM2/SHC1/KIF23/ITGA5/CCNG1/DDIT4/CCND1/ERBB2/HDAC1/VIM/IKBKB/ATM/PLCG2/CDK6/BAK1/PIM1/PTEN/DICER1/CCNE1/NOTCH1/BCL2/MCL1/ROCK1/EFNA4/EFNA1/HMOX1/CDKN1A
hsa04672	Intestinal immune network for IgA production	40	-0.544266	-1.86645	0.00106929	0.00106929	0.0039606	2466	tags=55%, list=21%, signal=44%	3109/958/29851/3600/3115/5284/4055/3126/959/3676/3122/8741/6370/3108/3117/3601/942/3569/3119/3113/6387/7852	HLA-DMB/CD40/ICOS/IL15/HLA-DPB1/PIGR/LTBR/HLA-DRB4/CD40LG/ITGA4/HLA-DRA/TNFSF13/CCL25/HLA-DMA/HLA-DQA1/IL15RA/CD86/IL6/HLA-DQB1/HLA-DPA1/CXCL12/CXCR4
hsa00590	Arachidonic acid metabolism	44	-0.521976	-1.82793	0.00107782	0.00107782	0.0039606	1439	tags=32%, list=12%, signal=28%	5321/5743/11283/5319/30814/5322/874/1573/10728/6916/27306/240/4056/8644	PLA2G4A/PTGS2/CYP4F8/PLA2G1B/PLA2G2E/PLA2G5/CBR3/CYP2J2/PTGES3/TBXAS1/HPGDS/ALOX5/LTC4S/AKR1C3
hsa04657	IL-17 signaling pathway	85	-0.426188	-1.70047	0.00113122	0.00113122	0.00406524	2020	tags=33%, list=17%, signal=27%	64806/6278/2354/3596/6279/3320/8061/4790/5743/4322/5970/3553/6426/9618/2353/841/3569/6280/10758/3551/2919/3725/23765/1994/1051/7128/7184/6347	IL25/S100A7/FOSB/IL13/S100A8/HSP90AA1/FOSL1/NFKB1/PTGS2/MMP13/RELA/IL1B/SRSF1/TRAF4/FOS/CASP8/IL6/S100A9/TRAF3IP2/IKBKB/CXCL1/JUN/IL17RA/ELAVL1/CEBPB/TNFAIP3/HSP90B1/CCL2
hsa04668	TNF signaling pathway	101	-0.407723	-1.67662	0.00114653	0.00114653	0.00406524	2151	tags=38%, list=18%, signal=31%	3456/208/64127/3726/1326/5293/4217/1906/1435/4790/5743/182/5970/7412/4049/6401/3553/468/5609/8837/330/6352/3659/90993/2353/841/3569/3551/2919/3725/355/840/64764/1051/7128/7132/7133/6347	IFNB1/AKT2/NOD2/JUNB/MAP3K8/PIK3CD/MAP3K5/EDN1/CSF1/NFKB1/PTGS2/JAG1/RELA/VCAM1/LTA/SELE/IL1B/ATF4/MAP2K7/CFLAR/BIRC3/CCL5/IRF1/CREB3L1/FOS/CASP8/IL6/IKBKB/CXCL1/JUN/FAS/CASP7/CREB3L2/CEBPB/TNFAIP3/TNFRSF1A/TNFRSF1B/CCL2
hsa01210	2-Oxocarboxylic acid metabolism	13	0.766709	1.92186	0.00121017	0.00121017	0.00421691	1296	tags=69%, list=11%, signal=62%	2805/50/1431/3419/3420/2806/3421/586/3418	GOT1/ACO2/CS/IDH3A/IDH3B/GOT2/IDH3G/BCAT1/IDH2
hsa05416	Viral myocarditis	54	-0.479702	-1.75589	0.0013052	0.0013052	0.00447098	2466	tags=41%, list=21%, signal=32%	3115/3126/959/3105/3122/3133/842/3108/6442/3117/6443/595/942/4624/857/841/3119/3689/5880/3113/5551/3683	HLA-DPB1/HLA-DRB4/CD40LG/HLA-A/HLA-DRA/HLA-E/CASP9/HLA-DMA/SGCA/HLA-DQA1/SGCB/CCND1/CD86/MYH6/CAV1/CASP8/HLA-DQB1/ITGB2/RAC2/HLA-DPA1/PRF1/ITGAL
hsa04640	Hematopoietic cell lineage	90	-0.416278	-1.67617	0.00136333	0.00136333	0.00448488	2941	tags=51%, list=25%, signal=39%	948/933/912/2209/3673/3109/928/911/925/917/914/930/3568/1791/915/2993/3115/910/3562/3655/3126/3676/3122/924/1438/3672/7850/920/1435/3108/3117/3570/3678/3589/3553/7066/2323/951/929/3554/1436/3569/3119/3113/3566/3684	CD36/CD22/CD1D/FCGR1A/ITGA2/HLA-DMB/CD9/CD1C/CD8A/CD3G/CD2/CD19/IL5RA/DNTT/CD3D/GYPA/HLA-DPB1/CD1B/IL3/ITGA6/HLA-DRB4/ITGA4/HLA-DRA/CD7/CSF2RA/ITGA1/IL1R2/CD4/CSF1/HLA-DMA/HLA-DQA1/IL6R/ITGA5/IL11/IL1B/THPO/FLT3LG/CD37/CD14/IL1R1/CSF1R/IL6/HLA-DQB1/HLA-DPA1/IL4R/ITGAM
hsa04261	Adrenergic signaling in cardiomyocytes	129	0.413138	1.67331	0.00137315	0.00137315	0.00448488	1855	tags=29%, list=16%, signal=25%	5332/55799/6543/784/11069/816/491/115/107/9254/185/489/109/6262/5518/818/10368/476/481/5600/55844/5527/5515/6546/183/5594/10000/9252/2778/5526/477/488/10369/6548/6300/2776/483/782	PLCB4/CACNA2D3/SLC8A2/CACNB3/RAPGEF4/CAMK2B/ATP2B2/ADCY9/ADCY1/CACNA2D2/AGTR1/ATP2A3/ADCY3/RYR2/PPP2R1A/CAMK2G/CACNG3/ATP1A1/ATP1B1/MAPK11/PPP2R2D/PPP2R5C/PPP2CA/SLC8A1/AGT/MAPK1/AKT3/RPS6KA5/GNAS/PPP2R5B/ATP1A2/ATP2A2/CACNG2/SLC9A1/MAPK12/GNAQ/ATP1B3/CACNB1
hsa03040	Spliceosome	101	-0.397261	-1.6336	0.00137583	0.00137583	0.00448488	3568	tags=41%, list=30%, signal=29%	55696/9128/23451/4686/6629/6635/7307/23658/10772/9775/23350/55110/51691/22938/51340/1665/8175/25949/23450/3183/8896/10523/6432/10465/9984/220988/3178/6631/27258/9129/6634/51690/6426/10285/6637/55119/22985/55660/3310/3305/29896	RBM22/PRPF4/SF3B1/NCBP1/SNRPB2/SNRPE/U2AF1/LSM5/SRSF10/EIF4A3/U2SURP/MAGOHB/LSM8/SNW1/CRNKL1/DHX15/SF3A2/SYF2/SF3B3/HNRNPC/BUD31/CHERP/SRSF7/PPIH/THOC1/HNRNPA3/HNRNPA1/SNRPC/LSM3/PRPF3/SNRPD3/LSM7/SRSF1/SMNDC1/SNRPG/PRPF38B/ACIN1/PRPF40A/HSPA6/HSPA1L/TRA2A
hsa01200	Carbon metabolism	100	0.429484	1.67097	0.0014245	0.0014245	0.00456983	1612	tags=34%, list=14%, signal=30%	55753/5214/2805/2026/4190/5213/230/50/1431/8803/3098/6389/10873/3419/1738/3420/5162/5631/2023/2821/2806/4191/3421/226/39/2747/1737/7167/3418/10993/5223/6470/2271/5096	OGDHL/PFKP/GOT1/ENO2/MDH1/PFKM/ALDOC/ACO2/CS/SUCLA2/HK1/SDHA/ME3/IDH3A/DLD/IDH3B/PDHB/PRPS1/ENO1/GPI/GOT2/MDH2/IDH3G/ALDOA/ACAT2/GLUD2/DLAT/TPI1/IDH2/SDS/PGAM1/SHMT1/FH/PCCB
hsa05203	Viral carcinogenesis	154	-0.348888	-1.52322	0.00147529	0.00147529	0.00465881	2991	tags=37%, list=25%, signal=28%	1019/1960/3134/79885/1387/1111/896/2934/5366/1237/22938/3661/2957/5295/7157/6774/4055/5925/3105/572/51564/3133/5293/4893/3572/1232/9134/81/4790/5568/4193/5970/1234/468/595/10379/9261/5829/6776/2967/90993/3065/6850/6672/841/6502/5922/1021/2961/4067/3725/578/890/898/64764/3665/1026	CDK4/EGR3/HLA-F/HDAC11/CREBBP/CHEK1/CCND3/GSN/PMAIP1/CCR8/SNW1/IRF3/GTF2A1/PIK3R1/TP53/STAT3/LTBR/RB1/HLA-A/BAD/HDAC7/HLA-E/PIK3CD/NRAS/IL6ST/CCR3/CCNE2/ACTN4/NFKB1/PRKACG/MDM2/RELA/CCR5/ATF4/CCND1/IRF9/MAPKAPK2/PXN/STAT5A/GTF2H3/CREB3L1/HDAC1/SYK/SP100/CASP8/SKP2/RASA2/CDK6/GTF2E2/LYN/JUN/BAK1/CCNA2/CCNE1/CREB3L2/IRF7/CDKN1A
hsa05163	Human cytomegalovirus infection	200	-0.333132	-1.51023	0.00178845	0.00178845	0.00549569	2576	tags=34%, list=22%, signal=27%	3579/5578/3661/1432/3441/5894/5295/7157/6774/5925/3105/3456/208/567/7422/3133/842/5293/4893/2788/1232/3709/2773/91860/4790/6655/5743/5568/4775/4193/3570/5970/1234/2791/3553/468/595/811/5829/3440/3588/6352/51806/2787/90993/3554/841/2923/3569/2768/3551/5734/1021/578/355/5880/64764/6093/7132/6351/1230/1978/6387/3587/1026/113/7852/6347	CXCR2/PRKCA/IRF3/MAPK14/IFNA4/RAF1/PIK3R1/TP53/STAT3/RB1/HLA-A/IFNB1/AKT2/B2M/VEGFA/HLA-E/CASP9/PIK3CD/NRAS/GNG7/CCR3/ITPR2/GNAI3/CALML4/NFKB1/SOS2/PTGS2/PRKACG/NFATC3/MDM2/IL6R/RELA/CCR5/GNG11/IL1B/ATF4/CCND1/CALR/PXN/IFNA2/IL10RB/CCL5/CALML5/GNG5/CREB3L1/IL1R1/CASP8/PDIA3/IL6/GNA12/IKBKB/PTGER4/CDK6/BAK1/FAS/RAC2/CREB3L2/ROCK1/TNFRSF1A/CCL4/CCR1/EIF4EBP1/CXCL12/IL10RA/CDKN1A/ADCY7/CXCR4/CCL2
hsa04070	Phosphatidylinositol signaling system	83	0.460206	1.73569	0.00179469	0.00179469	0.00549569	1176	tags=23%, list=10%, signal=21%	5332/8867/3631/5297/22876/23262/4952/5291/8503/8821/23396/8395/9110/1040/9677/3708/3705/8760/3612	PLCB4/SYNJ1/INPP4A/PI4KA/INPP5F/PPIP5K2/OCRL/PIK3CB/PIK3R3/INPP4B/PIP5K1C/PIP5K1B/MTMR4/CDS1/PPIP5K1/ITPR1/ITPK1/CDS2/IMPA1
hsa04714	Thermogenesis	164	0.378241	1.58331	0.00184657	0.00184657	0.00557016	2609	tags=34%, list=22%, signal=26%	1268/1353/7384/6604/4719/115/107/10891/51412/4698/51422/4729/6597/2182/109/7249/4720/6389/5571/1537/23305/5600/5346/4704/4714/6197/4705/4706/9377/7386/2778/1337/4723/3845/23028/4701/1355/6300/63976/6654/57104/1345/4724/4697/7385/5567/1385/1347/1327/2475/4878/55744/51103/4722/114	CNR1/COX11/UQCRC1/SMARCD3/NDUFS1/ADCY9/ADCY1/PPARGC1A/ACTL6B/NDUFA5/PRKAG2/NDUFV2/SMARCA4/ACSL4/ADCY3/TSC2/NDUFS2/SDHA/PRKAG1/CYC1/ACSL6/MAPK11/PLIN1/NDUFA9/NDUFB8/RPS6KA3/NDUFA10/NDUFAB1/COX5A/UQCRFS1/GNAS/COX6A1/NDUFV1/KRAS/KDM1A/NDUFA7/COX15/MAPK12/PRDM16/SOS1/PNPLA2/COX6C/NDUFS4/NDUFA4/UQCRC2/PRKACB/CREB1/COX7A2/COX4I1/MTOR/NPPA/COA1/NDUFAF1/NDUFS3/ADCY8
hsa05320	Autoimmune thyroid disease	46	-0.500948	-1.77515	0.00215193	0.00215193	0.00639582	3939	tags=57%, list=33%, signal=38%	3445/941/3106/3107/3135/3109/958/3448/1493/3134/3441/3115/3126/959/3105/3122/3133/3108/7253/3117/942/3440/3119/355/3113/5551	IFNA8/CD80/HLA-B/HLA-C/HLA-G/HLA-DMB/CD40/IFNA14/CTLA4/HLA-F/IFNA4/HLA-DPB1/HLA-DRB4/CD40LG/HLA-A/HLA-DRA/HLA-E/HLA-DMA/TSHR/HLA-DQA1/CD86/IFNA2/HLA-DQB1/FAS/HLA-DPA1/PRF1
hsa01230	Biosynthesis of amino acids	61	0.490844	1.74829	0.00220751	0.00220751	0.00646592	1582	tags=41%, list=13%, signal=36%	5214/2805/2026/440/5213/230/50/1431/3419/875/3420/5631/2023/435/2806/3421/384/226/586/2752/7167/3418/10993/5223/6470	PFKP/GOT1/ENO2/ASNS/PFKM/ALDOC/ACO2/CS/IDH3A/CBS/IDH3B/PRPS1/ENO1/ASL/GOT2/IDH3G/ARG2/ALDOA/BCAT1/GLUL/TPI1/IDH2/SDS/PGAM1/SHMT1
hsa05144	Malaria	44	-0.499583	-1.74951	0.0023712	0.0023712	0.00684617	2710	tags=48%, list=23%, signal=37%	1311/2532/6403/7058/2993/7057/959/3082/5175/7412/6401/3553/4615/7097/3569/3606/3043/3689/3683/2995/6347	COMP/ACKR1/SELP/THBS2/GYPA/THBS1/CD40LG/HGF/PECAM1/VCAM1/SELE/IL1B/MYD88/TLR2/IL6/IL18/HBB/ITGB2/ITGAL/GYPC/CCL2
hsa05415	Diabetic cardiomyopathy	159	0.372619	1.55508	0.00301659	0.00301659	0.00858689	2185	tags=30%, list=19%, signal=25%	5332/816/7384/4719/5601/291/4698/185/5291/8503/5166/4729/489/4720/6262/6389/2673/1537/818/5162/5590/5600/4704/7416/4714/4705/4706/183/10000/9377/7386/1337/4723/7419/2998/488/4701/5164/5160/6300/5290/1345/4724/7043/4697/7385/1509/292	PLCB4/CAMK2B/UQCRC1/NDUFS1/MAPK9/SLC25A4/NDUFA5/AGTR1/PIK3CB/PIK3R3/PDK4/NDUFV2/ATP2A3/NDUFS2/RYR2/SDHA/GFPT1/CYC1/CAMK2G/PDHB/PRKCZ/MAPK11/NDUFA9/VDAC1/NDUFB8/NDUFA10/NDUFAB1/AGT/AKT3/COX5A/UQCRFS1/COX6A1/NDUFV1/VDAC3/GYS2/ATP2A2/NDUFA7/PDK2/PDHA1/MAPK12/PIK3CA/COX6C/NDUFS4/TGFB3/NDUFA4/UQCRC2/CTSD/SLC25A5
hsa05332	Graft-versus-host disease	36	-0.528964	-1.7672	0.00360475	0.00360475	0.0101186	4074	tags=72%, list=35%, signal=47%	3458/3802/941/3106/3107/3135/3109/3134/3824/57292/3115/3126/3105/3122/3133/3811/3804/3108/3117/3553/942/3569/3119/355/3113/5551	IFNG/KIR2DL1/CD80/HLA-B/HLA-C/HLA-G/HLA-DMB/HLA-F/KLRD1/KIR2DL5A/HLA-DPB1/HLA-DRB4/HLA-A/HLA-DRA/HLA-E/KIR3DL1/KIR2DL3/HLA-DMA/HLA-DQA1/IL1B/CD86/IL6/HLA-DQB1/FAS/HLA-DPA1/PRF1
hsa04210	Apoptosis	127	-0.357991	-1.52205	0.00452058	0.00452058	0.0125153	2387	tags=36%, list=20%, signal=29%	839/5894/3562/5295/7157/572/208/317/842/5783/5293/4893/4217/1677/3709/4790/4616/1647/1616/84823/5970/1965/468/8743/8837/1439/330/2353/841/1512/597/3551/472/3725/1522/578/355/596/5551/840/4170/1075/55367/7132/1520/8795	CASP6/RAF1/IL3/PIK3R1/TP53/BAD/AKT2/APAF1/CASP9/PTPN13/PIK3CD/NRAS/MAP3K5/DFFB/ITPR2/NFKB1/GADD45B/GADD45A/DAXX/LMNB2/RELA/EIF2S1/ATF4/TNFSF10/CFLAR/CSF2RB/BIRC3/FOS/CASP8/CTSH/BCL2A1/IKBKB/ATM/JUN/CTSZ/BAK1/FAS/BCL2/PRF1/CASP7/MCL1/CTSC/PIDD1/TNFRSF1A/CTSS/TNFRSF10B
hsa00010	Glycolysis / Gluconeogenesis	58	0.473474	1.66557	0.00463564	0.00463564	0.0125153	1733	tags=33%, list=15%, signal=28%	5214/2026/5213/230/3098/1738/5162/2023/2821/26330/226/5236/1737/7167/5223/669/3939/10327/5160	PFKP/ENO2/PFKM/ALDOC/HK1/DLD/PDHB/ENO1/GPI/GAPDHS/ALDOA/PGM1/DLAT/TPI1/PGAM1/BPGM/LDHA/AKR1A1/PDHA1
hsa04630	JAK-STAT signaling pathway	145	-0.339842	-1.47274	0.00464434	0.00464434	0.0125153	3110	tags=37%, list=26%, signal=28%	3448/50616/64109/3600/59067/1387/51561/3594/3578/896/3593/3568/3441/5894/3562/8835/5295/6774/3456/208/6778/3596/51588/1438/5293/3572/3454/29949/6655/5155/3601/3570/50615/3589/3597/595/10379/1439/7066/6776/3440/3595/3588/5771/3459/3460/3569/5292/596/3566/9466/4170/3587/1026	IFNA14/IL22/CRLF2/IL15/IL21/CREBBP/IL23A/IL12RB1/IL9/CCND3/IL12B/IL5RA/IFNA4/RAF1/IL3/SOCS2/PIK3R1/STAT3/IFNB1/AKT2/STAT6/IL13/PIAS4/CSF2RA/PIK3CD/IL6ST/IFNAR1/IL19/SOS2/PDGFB/IL15RA/IL6R/IL21R/IL11/IL13RA1/CCND1/IRF9/CSF2RB/THPO/STAT5A/IFNA2/IL12RB2/IL10RB/PTPN2/IFNGR1/IFNGR2/IL6/PIM1/BCL2/IL4R/IL27RA/MCL1/IL10RA/CDKN1A
hsa04964	Proximal tubule bicarbonate reclamation	21	0.630927	1.79064	0.00475059	0.00475059	0.0126332	1831	tags=48%, list=16%, signal=40%	27165/4190/2744/476/481/8671/2747/477/10991/483	GLS2/MDH1/GLS/ATP1A1/ATP1B1/SLC4A4/GLUD2/ATP1A2/SLC38A3/ATP1B3
hsa00900	Terpenoid backbone biosynthesis	19	0.644673	1.78556	0.00497413	0.00497413	0.0130558	1299	tags=37%, list=11%, signal=33%	51449/3157/3422/3156/23463/39/2224	PCYOX1/HMGCS1/IDI1/HMGCR/ICMT/ACAT2/FDPS
hsa04720	Long-term potentiation	61	0.465466	1.6579	0.00515085	0.00515085	0.0133463	1458	tags=23%, list=12%, signal=20%	2890/2911/5332/816/107/5530/5532/2891/818/3708/6197/5594/2915/3845	GRIA1/GRM1/PLCB4/CAMK2B/ADCY1/PPP3CA/PPP3CB/GRIA2/CAMK2G/ITPR1/RPS6KA3/MAPK1/GRM5/KRAS
hsa04662	B cell receptor signaling pathway	76	-0.402588	-1.57527	0.00626398	0.00626398	0.0160251	2374	tags=38%, list=20%, signal=31%	5894/5295/10859/208/3635/5293/29760/4893/11006/10892/4790/6655/7409/27071/4775/5970/11027/6850/2353/23547/25780/3551/5336/4067/3725/8915/5880/8519/2213	RAF1/PIK3R1/LILRB1/AKT2/INPP5D/PIK3CD/BLNK/NRAS/LILRB4/MALT1/NFKB1/SOS2/VAV1/DAPP1/NFATC3/RELA/LILRA2/SYK/FOS/LILRA4/RASGRP3/IKBKB/PLCG2/LYN/JUN/BCL10/RAC2/IFITM1/FCGR2B
hsa04613	Neutrophil extracellular trap formation	103	-0.36807	-1.51849	0.00642202	0.00642202	0.016224	2635	tags=36%, list=22%, signal=28%	4353/6403/5578/5335/1432/5894/5295/51564/208/653361/5293/1511/27180/64581/4790/4688/5970/837/7097/1991/3065/6850/6404/1535/1536/5336/3689/5880/3684/3683/2357/834/728/2212/51284/2215/4689	MPO/SELP/PRKCA/PLCG1/MAPK14/RAF1/PIK3R1/HDAC7/AKT2/NCF1/PIK3CD/CTSG/SIGLEC9/CLEC7A/NFKB1/NCF2/RELA/CASP4/TLR2/ELANE/HDAC1/SYK/SELPLG/CYBA/CYBB/PLCG2/ITGB2/RAC2/ITGAM/ITGAL/FPR1/CASP1/C5AR1/FCGR2A/TLR7/FCGR3B/NCF4
hsa04725	Cholinergic synapse	96	0.406511	1.57182	0.00715052	0.00715052	0.0178414	1202	tags=20%, list=10%, signal=18%	43/3785/5332/2785/3763/816/10681/115/107/5291/8503/3761/109/818/2782/2775/3708/5594/10000	ACHE/KCNQ2/PLCB4/GNG3/KCNJ6/CAMK2B/GNB5/ADCY9/ADCY1/PIK3CB/PIK3R3/KCNJ4/ADCY3/CAMK2G/GNB1/GNAO1/ITPR1/MAPK1/AKT3
hsa04936	Alcoholic liver disease	128	-0.344087	-1.46313	0.00837922	0.00837922	0.0206446	1309	tags=21%, list=11%, signal=19%	5563/5970/719/3553/4615/5609/3929/595/3440/929/79966/841/3569/51/3551/2919/355/23765/6932/51176/712/10645/7132/713/728/29896/23643	PRKAA2/RELA/C3AR1/IL1B/MYD88/MAP2K7/LBP/CCND1/IFNA2/CD14/SCD5/CASP8/IL6/ACOX1/IKBKB/CXCL1/FAS/IL17RA/TCF7/LEF1/C1QA/CAMKK2/TNFRSF1A/C1QB/C5AR1/TRA2A/LY96
hsa04623	Cytosolic DNA-sensing pathway	51	-0.443013	-1.60338	0.00847826	0.00847826	0.0206446	2622	tags=35%, list=22%, signal=28%	29108/3661/3441/81030/3456/4790/51082/5970/3553/3440/6352/5435/3569/3606/3551/834/6351/3665	PYCARD/IRF3/IFNA4/ZBP1/IFNB1/NFKB1/POLR1D/RELA/IL1B/IFNA2/CCL5/POLR2F/IL6/IL18/IKBKB/CASP1/CCL4/IRF7
hsa05230	Central carbon metabolism in cancer	66	0.442622	1.602	0.00964689	0.00964689	0.0232106	1733	tags=30%, list=15%, signal=26%	5979/27165/5214/2744/5213/5291/8503/3098/4916/5162/9997/3815/1956/5594/10000/3418/3845/5223/3939/5160	RET/GLS2/PFKP/GLS/PFKM/PIK3CB/PIK3R3/HK1/NTRK3/PDHB/SCO2/KIT/EGFR/MAPK1/AKT3/IDH2/KRAS/PGAM1/LDHA/PDHA1
hsa04730	Long-term depression	51	0.475902	1.64178	0.0099963	0.0099963	0.0237081	1979	tags=35%, list=17%, signal=29%	2890/2911/5332/2891/5518/2775/5515/6261/3708/8605/5594/10672/2778/3845/1394/2776/10842/5604	GRIA1/GRM1/PLCB4/GRIA2/PPP2R1A/GNAO1/PPP2CA/RYR1/ITPR1/PLA2G4C/MAPK1/GNA13/GNAS/KRAS/CRHR1/GNAQ/PPP1R17/MAP2K1
hsa05330	Allograft rejection	33	-0.502572	-1.64553	0.0100883	0.0100883	0.0237081	4074	tags=67%, list=35%, signal=44%	3458/941/3106/3107/3135/3109/958/3134/3593/3115/3126/959/3105/3122/3133/3108/3117/942/3119/355/3113/5551	IFNG/CD80/HLA-B/HLA-C/HLA-G/HLA-DMB/CD40/HLA-F/IL12B/HLA-DPB1/HLA-DRB4/CD40LG/HLA-A/HLA-DRA/HLA-E/HLA-DMA/HLA-DQA1/CD86/HLA-DQB1/FAS/HLA-DPA1/PRF1
hsa04658	Th1 and Th2 cell differentiation	83	-0.377971	-1.50287	0.0110609	0.0110609	0.0256951	3404	tags=49%, list=29%, signal=35%	5603/3109/55534/4794/27040/917/3594/3593/4772/10683/915/5335/4854/1432/3115/3126/6778/3122/3596/920/4790/4853/3108/3117/182/4775/5970/6776/919/3595/3459/3460/2353/3551/3119/864/3725/4851/3113/3566/4094	MAPK13/HLA-DMB/MAML3/NFKBIE/LAT/CD3G/IL12RB1/IL12B/NFATC1/DLL3/CD3D/PLCG1/NOTCH3/MAPK14/HLA-DPB1/HLA-DRB4/STAT6/HLA-DRA/IL13/CD4/NFKB1/NOTCH2/HLA-DMA/HLA-DQA1/JAG1/NFATC3/RELA/STAT5A/CD247/IL12RB2/IFNGR1/IFNGR2/FOS/IKBKB/HLA-DQB1/RUNX3/JUN/NOTCH1/HLA-DPA1/IL4R/MAF
hsa00620	Pyruvate metabolism	40	0.499884	1.63833	0.0120165	0.0120165	0.0275978	3152	tags=57%, list=27%, signal=42%	4190/31/10873/1738/5162/4191/39/1737/2271/3939/10327/97/5160/38/2739/3029/217/5091/224/32/128/5315/3945	MDH1/ACACA/ME3/DLD/PDHB/MDH2/ACAT2/DLAT/FH/LDHA/AKR1A1/ACYP1/PDHA1/ACAT1/GLO1/HAGH/ALDH2/PC/ALDH3A2/ACACB/ADH5/PKM/LDHB
hsa04925	Aldosterone synthesis and secretion	83	0.401396	1.51388	0.0127423	0.0127423	0.028917	1831	tags=29%, list=16%, signal=25%	5332/816/491/115/107/8911/5138/185/4929/3777/109/818/476/481/3708/57172/8913/183/2778/1585/477/8536/2776/483	PLCB4/CAMK2B/ATP2B2/ADCY9/ADCY1/CACNA1I/PDE2A/AGTR1/NR4A2/KCNK3/ADCY3/CAMK2G/ATP1A1/ATP1B1/ITPR1/CAMK1G/CACNA1G/AGT/GNAS/CYP11B2/ATP1A2/CAMK1/GNAQ/ATP1B3
hsa04971	Gastric acid secretion	63	0.437859	1.56896	0.0128771	0.0128771	0.028917	1831	tags=27%, list=16%, signal=23%	6750/5332/816/115/107/109/818/3766/476/481/3708/7430/2778/477/6548/2776/483	SST/PLCB4/CAMK2B/ADCY9/ADCY1/ADCY3/CAMK2G/KCNJ10/ATP1A1/ATP1B1/ITPR1/EZR/GNAS/ATP1A2/SLC9A1/GNAQ/ATP1B3
hsa04115	p53 signaling pathway	63	-0.406874	-1.53762	0.0137976	0.0137976	0.0303246	2991	tags=49%, list=25%, signal=37%	1019/1111/3732/896/5366/55240/7157/7057/10572/27244/317/842/9134/4616/1647/4193/2810/900/595/11200/51512/841/472/1021/355/5728/898/596/55367/8795/1026	CDK4/CHEK1/CD82/CCND3/PMAIP1/STEAP3/TP53/THBS1/SIVA1/SESN1/APAF1/CASP9/CCNE2/GADD45B/GADD45A/MDM2/SFN/CCNG1/CCND1/CHEK2/GTSE1/CASP8/ATM/CDK6/FAS/PTEN/CCNE1/BCL2/PIDD1/TNFRSF10B/CDKN1A
hsa04620	Toll-like receptor signaling pathway	93	-0.36267	-1.46857	0.013804	0.013804	0.0303246	1483	tags=34%, list=13%, signal=30%	3661/1432/3441/5295/3456/208/6373/1326/5293/3454/4790/5970/3553/4615/5609/3929/7097/942/3440/7098/929/6352/2353/841/3569/3551/3725/6351/51284/3665/7100/23643	IRF3/MAPK14/IFNA4/PIK3R1/IFNB1/AKT2/CXCL11/MAP3K8/PIK3CD/IFNAR1/NFKB1/RELA/IL1B/MYD88/MAP2K7/LBP/TLR2/CD86/IFNA2/TLR3/CD14/CCL5/FOS/CASP8/IL6/IKBKB/JUN/CCL4/TLR7/IRF7/TLR5/LY96
hsa04929	GnRH secretion	59	0.448016	1.5851	0.0142171	0.0142171	0.0308963	2011	tags=29%, list=17%, signal=24%	9568/5332/3763/2550/8911/5291/8503/408/3708/8913/5594/10000/3845/3765/2776/5604/5290	GABBR2/PLCB4/KCNJ6/GABBR1/CACNA1I/PIK3CB/PIK3R3/ARRB1/ITPR1/CACNA1G/MAPK1/AKT3/KRAS/KCNJ9/GNAQ/MAP2K1/PIK3CA
hsa04540	Gap junction	80	0.401294	1.5077	0.0157424	0.0157424	0.033847	1979	tags=29%, list=17%, signal=24%	2911/3358/5332/7277/115/107/10381/109/7280/10383/1956/3708/1812/5594/203068/2778/2915/3845/1813/2776/6654/5598/5604	GRM1/HTR2C/PLCB4/TUBA4A/ADCY9/ADCY1/TUBB3/ADCY3/TUBB2A/TUBB4B/EGFR/ITPR1/DRD1/MAPK1/TUBB/GNAS/GRM5/KRAS/DRD2/GNAQ/SOS1/MAPK7/MAP2K1
hsa04979	Cholesterol metabolism	45	-0.439859	-1.54951	0.0161673	0.0161673	0.0343947	2619	tags=40%, list=22%, signal=31%	19/29116/10948/3931/27141/350/338/6272/5360/706/1581/4023/10577/6646/1593/341/4036/26119	ABCA1/MYLIP/STARD3/LCAT/CIDEB/APOH/APOB/SORT1/PLTP/TSPO/CYP7A1/LPL/NPC2/SOAT1/CYP27A1/APOC1/LRP2/LDLRAP1
hsa00051	Fructose and mannose metabolism	28	0.538431	1.6304	0.0165177	0.0165177	0.0347741	1281	tags=36%, list=11%, signal=32%	5214/5213/230/3098/4351/6652/226/5208/5210/7167	PFKP/PFKM/ALDOC/HK1/MPI/SORD/ALDOA/PFKFB2/PFKFB4/TPI1
hsa05323	Rheumatoid arthritis	79	-0.37399	-1.47121	0.0171519	0.0171519	0.035737	1517	tags=37%, list=13%, signal=32%	3605/3126/284/3122/7422/8741/1435/3108/3117/3589/3553/7097/2321/54/942/8992/6352/2353/3569/3606/2919/3119/3725/3689/10312/3113/3683/6387/6347	IL17A/HLA-DRB4/ANGPT1/HLA-DRA/VEGFA/TNFSF13/CSF1/HLA-DMA/HLA-DQA1/IL11/IL1B/TLR2/FLT1/ACP5/CD86/ATP6V0E1/CCL5/FOS/IL6/IL18/CXCL1/HLA-DQB1/JUN/ITGB2/TCIRG1/HLA-DPA1/ITGAL/CXCL12/CCL2
hsa05310	Asthma	26	-0.527531	-1.63418	0.0173789	0.0173789	0.0358404	3610	tags=62%, list=31%, signal=43%	5553/3109/958/3578/6037/3115/3562/3126/959/3122/3596/3108/3117/3119/2207/3113	PRG2/HLA-DMB/CD40/IL9/RNASE3/HLA-DPB1/IL3/HLA-DRB4/CD40LG/HLA-DRA/IL13/HLA-DMA/HLA-DQA1/HLA-DQB1/FCER1G/HLA-DPA1
hsa00230	Purine metabolism	96	0.375046	1.45015	0.0202002	0.0202002	0.0405373	1495	tags=23%, list=13%, signal=20%	3251/956/5141/115/107/4830/5138/9583/109/51292/271/5136/5144/5631/132/5153/8622/5236/10846/471/1633/955	HPRT1/ENTPD3/PDE4A/ADCY9/ADCY1/NME1/PDE2A/ENTPD4/ADCY3/GMPR2/AMPD2/PDE1A/PDE4D/PRPS1/ADK/PDE1B/PDE8B/PGM1/PDE10A/ATIC/DCK/ENTPD6
hsa04072	Phospholipase D signaling pathway	131	0.347197	1.40851	0.0202228	0.0202228	0.0405373	1458	tags=21%, list=12%, signal=18%	1759/2911/5332/11069/26052/115/107/185/5291/8503/23396/8395/109/7249/3815/1956/183/8605/5594/56848/10000/10672/5899/2778/2915/2185/3845	DNM1/GRM1/PLCB4/RAPGEF4/DNM3/ADCY9/ADCY1/AGTR1/PIK3CB/PIK3R3/PIP5K1C/PIP5K1B/ADCY3/TSC2/KIT/EGFR/AGT/PLA2G4C/MAPK1/SPHK2/AKT3/GNA13/RALB/GNAS/GRM5/PTK2B/KRAS
hsa04740	Olfactory transduction	70	0.410689	1.50207	0.0203414	0.0203414	0.0405373	1077	tags=19%, list=9%, signal=17%	6543/816/2774/26659/5138/83988/408/109/818/5136/2782/5153/6546	SLC8A2/CAMK2B/GNAL/OR7A5/PDE2A/NCALD/ARRB1/ADCY3/CAMK2G/PDE1A/GNB1/PDE1B/SLC8A1
hsa04024	cAMP signaling pathway	189	0.322412	1.373	0.0204587	0.0204587	0.0405373	1731	tags=20%, list=15%, signal=17%	2890/9568/6750/7432/11069/5141/816/116/491/2550/5601/115/107/5291/8503/489/109/6262/2891/818/5144/9475/476/481/1812/5594/10000/10846/10451/2778/477/5733/488/5727/627/6548/1813/1394	GRIA1/GABBR2/SST/VIP/RAPGEF4/PDE4A/CAMK2B/ADCYAP1/ATP2B2/GABBR1/MAPK9/ADCY9/ADCY1/PIK3CB/PIK3R3/ATP2A3/ADCY3/RYR2/GRIA2/CAMK2G/PDE4D/ROCK2/ATP1A1/ATP1B1/DRD1/MAPK1/AKT3/PDE10A/VAV3/GNAS/ATP1A2/PTGER3/ATP2A2/PTCH1/BDNF/SLC9A1/DRD2/CRHR1
hsa04625	C-type lectin receptor signaling pathway	94	-0.35081	-1.42364	0.0220154	0.0220154	0.0431657	2946	tags=41%, list=25%, signal=31%	1960/51561/3593/4772/29108/1432/5894/5295/30835/208/6237/26253/5293/4893/3709/10892/64581/91860/4790/5743/4775/4193/5970/5971/3553/10379/9261/51806/3659/868/6850/841/3569/3551/5336/3725/8915/2207/834	EGR3/IL23A/IL12B/NFATC1/PYCARD/MAPK14/RAF1/PIK3R1/CD209/AKT2/RRAS/CLEC4E/PIK3CD/NRAS/ITPR2/MALT1/CLEC7A/CALML4/NFKB1/PTGS2/NFATC3/MDM2/RELA/RELB/IL1B/IRF9/MAPKAPK2/CALML5/IRF1/CBLB/SYK/CASP8/IL6/IKBKB/PLCG2/JUN/BCL10/FCER1G/CASP1
hsa05220	Chronic myeloid leukemia	72	-0.375305	-1.45711	0.0222124	0.0222124	0.0431657	2374	tags=36%, list=20%, signal=29%	5894/5295/7157/2122/5925/572/208/5293/4893/4790/6655/4616/1647/4088/4193/5970/6464/595/6776/3065/1488/3551/7048/1021/578/1026	RAF1/PIK3R1/TP53/MECOM/RB1/BAD/AKT2/PIK3CD/NRAS/NFKB1/SOS2/GADD45B/GADD45A/SMAD3/MDM2/RELA/SHC1/CCND1/STAT5A/HDAC1/CTBP2/IKBKB/TGFBR2/CDK6/BAK1/CDKN1A
hsa00514	Other types of O-glycan biosynthesis	29	-0.493255	-1.56703	0.0234809	0.0234809	0.0451964	2430	tags=41%, list=21%, signal=33%	23509/29954/55568/4242/56983/6480/2591/51809/8985/2683/79709/285203	POFUT1/POMT2/GALNT10/MFNG/POGLUT1/ST6GAL1/GALNT3/GALNT7/PLOD3/B4GALT1/COLGALT1/EOGT
hsa05161	Hepatitis B	151	-0.308556	-1.34302	0.0275252	0.0275252	0.052481	2574	tags=31%, list=22%, signal=25%	5578/3661/1432/3441/5894/5295/7157/6774/5925/572/3456/208/6778/317/842/5293/4893/9134/3454/4790/6655/4088/4775/5970/468/4615/5609/3339/7097/6776/3440/7098/90993/2353/841/3569/3551/7048/3725/355/890/898/596/64764/64135/3665/1026	PRKCA/IRF3/MAPK14/IFNA4/RAF1/PIK3R1/TP53/STAT3/RB1/BAD/IFNB1/AKT2/STAT6/APAF1/CASP9/PIK3CD/NRAS/CCNE2/IFNAR1/NFKB1/SOS2/SMAD3/NFATC3/RELA/ATF4/MYD88/MAP2K7/HSPG2/TLR2/STAT5A/IFNA2/TLR3/CREB3L1/FOS/CASP8/IL6/IKBKB/TGFBR2/JUN/FAS/CCNA2/CCNE1/BCL2/CREB3L2/IFIH1/IRF7/CDKN1A
hsa00030	Pentose phosphate pathway	25	0.528917	1.55634	0.0305523	0.0305523	0.0577082	1151	tags=28%, list=10%, signal=25%	5214/5213/230/5631/2821/226/5236	PFKP/PFKM/ALDOC/PRPS1/GPI/ALDOA/PGM1
hsa00061	Fatty acid biosynthesis	16	0.599771	1.58108	0.0332997	0.0332997	0.0623152	773	tags=38%, list=7%, signal=35%	31/27349/2182/2194/23305/51102	ACACA/MCAT/ACSL4/FASN/ACSL6/MECR
hsa04962	Vasopressin-regulated water reabsorption	39	0.463637	1.51102	0.0346962	0.0346962	0.0643328	2484	tags=49%, list=21%, signal=39%	115/398/1780/109/1778/51143/361/10540/51164/6844/2778/1639/8766/5567/396/79659/1385/5868/1783	ADCY9/ARHGDIG/DYNC1I1/ADCY3/DYNC1H1/DYNC1LI1/AQP4/DCTN2/DCTN4/VAMP2/GNAS/DCTN1/RAB11A/PRKACB/ARHGDIA/DYNC2H1/CREB1/RAB5A/DYNC1LI2
hsa04972	Pancreatic secretion	86	0.368476	1.39992	0.0373496	0.0373496	0.0686232	1933	tags=26%, list=16%, signal=22%	5332/885/491/115/107/489/109/6262/1811/476/481/3708/8671/952/2778/477/488/6548/1506/2776/483/8766	PLCB4/CCK/ATP2B2/ADCY9/ADCY1/ATP2A3/ADCY3/RYR2/SLC26A3/ATP1A1/ATP1B1/ITPR1/SLC4A4/CD38/GNAS/ATP1A2/ATP2A2/SLC9A1/CTRL/GNAQ/ATP1B3/RAB11A
hsa04726	Serotonergic synapse	95	0.358276	1.38306	0.0382553	0.0382553	0.0693913	1642	tags=19%, list=14%, signal=16%	3358/5332/2785/3763/6571/1644/10681/3751/2782/2775/3708/8605/5594/351/2778/3845/2560/3765	HTR2C/PLCB4/GNG3/KCNJ6/SLC18A2/DDC/GNB5/KCND2/GNB1/GNAO1/ITPR1/PLA2G4C/MAPK1/APP/GNAS/KRAS/GABRB1/KCNJ9
hsa00270	Cysteine and methionine metabolism	41	0.452002	1.48874	0.0384543	0.0384543	0.0693913	2578	tags=41%, list=22%, signal=33%	2805/4190/875/2806/4191/1036/2729/586/10993/3939/2730/7263/635/23382/29968/27430/10768	GOT1/MDH1/CBS/GOT2/MDH2/CDO1/GCLC/BCAT1/SDS/LDHA/GCLM/TST/BHMT/AHCYL2/PSAT1/MAT2B/AHCYL1
hsa04371	Apelin signaling pathway	117	0.340732	1.35887	0.0388248	0.0388248	0.0694397	1458	tags=22%, list=12%, signal=20%	5332/6543/2785/10681/115/107/10891/185/51422/109/6262/5571/30849/2782/4209/5346/6261/3708/6546/5594/56848/10000/10672/81631/8678/3845	PLCB4/SLC8A2/GNG3/GNB5/ADCY9/ADCY1/PPARGC1A/AGTR1/PRKAG2/ADCY3/RYR2/PRKAG1/PIK3R4/GNB1/MEF2D/PLIN1/RYR1/ITPR1/SLC8A1/MAPK1/SPHK2/AKT3/GNA13/MAP1LC3B/BECN1/KRAS
hsa01240	Biosynthesis of cofactors	105	0.349253	1.37128	0.0414453	0.0414453	0.0734764	2377	tags=34%, list=20%, signal=28%	23057/55312/4830/8836/8566/5805/1738/7360/7390/4351/51805/2729/586/211/51727/51109/9054/1503/6470/10327/51004/2730/5498/1355/4337/2643/2356/7389/203/10243/56474/2235/29968/3145/217/790	NMNAT2/RFK/NME1/GGH/PDXK/PTS/DLD/UGP2/UROS/MPI/COQ3/GCLC/BCAT1/ALAS1/CMPK1/RDH11/NFS1/CTPS1/SHMT1/AKR1A1/COQ6/GCLM/PPOX/COX15/MOCS1/GCH1/FPGS/UROD/AK1/GPHN/CTPS2/FECH/PSAT1/HMBS/ALDH2/CAD
hsa05031	Amphetamine addiction	57	0.407813	1.42682	0.0424502	0.0424502	0.0746035	896	tags=19%, list=8%, signal=18%	2890/6571/816/1644/5530/5532/7054/5173/2891/818/6531	GRIA1/SLC18A2/CAMK2B/DDC/PPP3CA/PPP3CB/TH/PDYN/GRIA2/CAMK2G/SLC6A3
hsa04530	Tight junction	139	-0.301963	-1.2987	0.0446277	0.0446277	0.0777542	3439	tags=42%, list=29%, signal=30%	54566/7846/7074/79784/5962/5565/51208/6794/911/7082/5010/4627/10092/1366/4734/1019/8189/57826/4633/11346/55114/910/10094/3996/10109/5906/3688/51421/3308/3993/4217/9181/81/5568/5563/23562/4637/5609/4478/595/1364/2064/51762/93643/7454/50848/8777/5519/10627/5872/3725/24146/6093/58494/4629/10398/8531/10095	EPB41L4B/TUBA1A/TIAM1/MYH14/RDX/PRKAB2/CLDN18/STK11/CD1C/TJP1/CLDN11/MYH9/ARPC5/CLDN7/NEDD4/CDK4/SYMPK/RAP2C/MYL2/SYNPO/ARHGAP17/CD1B/ARPC3/LLGL1/ARPC2/RAP1A/ITGB1/AMOTL2/HSPA4/LLGL2/MAP3K5/ARHGEF2/ACTN4/PRKACG/PRKAA2/CLDN14/MYL6/MAP2K7/MSN/CCND1/CLDN4/ERBB2/RAB8B/TJAP1/WAS/F11R/MPDZ/PPP2R1B/MYL12A/RAB13/JUN/CLDN15/ROCK1/JAM2/MYH11/MYL9/YBX3/ARPC1B
hsa04927	Cortisol synthesis and secretion	56	0.40716	1.42289	0.0458852	0.0458852	0.0785428	1351	tags=23%, list=11%, signal=21%	5332/115/107/8911/185/3777/109/5087/8622/3708/8913/183/2778	PLCB4/ADCY9/ADCY1/CACNA1I/AGTR1/KCNK3/ADCY3/PBX1/PDE8B/ITPR1/CACNA1G/AGT/GNAS
hsa00604	Glycosphingolipid biosynthesis - ganglio series	12	0.628975	1.54875	0.0463803	0.0463803	0.0785428	1957	tags=42%, list=17%, signal=35%	81849/8705/8869/6489/2583	ST6GALNAC5/B3GALT4/ST3GAL5/ST8SIA1/B4GALNT1
hsa04922	Glucagon signaling pathway	88	0.358676	1.3688	0.0466738	0.0466738	0.0785428	1789	tags=25%, list=15%, signal=21%	5332/5214/816/5834/10891/5530/5213/31/51422/5532/5571/818/5162/3708/10000/2778/5257/5223/2998/3939/5160/2776	PLCB4/PFKP/CAMK2B/PYGB/PPARGC1A/PPP3CA/PFKM/ACACA/PRKAG2/PPP3CB/PRKAG1/CAMK2G/PDHB/ITPR1/AKT3/GNAS/PHKB/PGAM1/GYS2/LDHA/PDHA1/GNAQ
hsa04973	Carbohydrate digestion and absorption	36	0.458869	1.47053	0.0472947	0.0472947	0.0785428	2728	tags=39%, list=23%, signal=30%	5332/5291/8503/3098/476/481/10000/477/483/5290/92579/482/486/23236	PLCB4/PIK3CB/PIK3R3/HK1/ATP1A1/ATP1B1/AKT3/ATP1A2/ATP1B3/PIK3CA/G6PC3/ATP1B2/FXYD2/PLCB1
hsa04144	Endocytosis	199	0.301539	1.29067	0.0473451	0.0473451	0.0785428	1207	tags=17%, list=10%, signal=16%	1759/273/10193/440073/6456/30845/26052/8723/9829/26056/408/8027/3800/10097/23396/8395/9525/6457/23327/1173/9922/9744/57180/60682/5590/55680/8976/1213/1212/1956/116986/10552/56904/998	DNM1/AMPH/RNF41/IQSEC3/SH3GL2/EHD3/DNM3/SNX4/DNAJC6/RAB11FIP5/ARRB1/STAM/KIF5C/ACTR2/PIP5K1C/PIP5K1B/VPS4B/SH3GL3/NEDD4L/AP2M1/IQSEC1/ACAP1/ACTR3B/SMAP1/PRKCZ/RUFY2/WASL/CLTC/CLTB/EGFR/AGAP2/ARPC1A/SH3GLB2/CDC42
hsa00260	Glycine, serine and threonine metabolism	32	-0.443582	-1.4449	0.0475094	0.0475094	0.0785428	963	tags=19%, list=8%, signal=17%	4128/8639/1610/212/5224/5723	MAOA/AOC3/DAO/ALAS2/PGAM2/PSPH
hsa04810	Regulation of actin cytoskeleton	193	-0.281096	-1.26577	0.0478007	0.0478007	0.0785428	3429	tags=40%, list=29%, signal=29%	1399/7074/79784/3682/5962/91807/55740/54434/5159/2260/8826/4627/10092/7414/10788/4633/2251/55970/2934/1730/8874/5216/8515/5894/2335/3655/5295/81624/3676/2264/10094/3071/10109/23191/10298/29895/6237/3688/9087/1729/3672/5293/2247/4893/5062/2846/8823/81/6655/7409/2246/5155/4636/3678/1902/4478/9459/4659/3693/7114/2149/5829/10163/5499/56034/10627/2768/3689/5880/3684/3683/6093/4629/10398/6387/10095/7852	CRKL/TIAM1/MYH14/ITGAE/RDX/MYLK3/ENAH/SSH1/PDGFRB/FGFR1/IQGAP1/MYH9/ARPC5/VCL/IQGAP2/MYL2/FGF6/GNG12/GSN/DIAPH2/ARHGEF7/PFN1/ITGA10/RAF1/FN1/ITGA6/PIK3R1/DIAPH3/ITGA4/FGFR4/ARPC3/NCKAP1L/ARPC2/CYFIP1/PAK4/MYLPF/RRAS/ITGB1/TMSB4Y/DIAPH1/ITGA1/PIK3CD/FGF2/NRAS/PAK2/LPAR4/FGF16/ACTN4/SOS2/VAV1/FGF1/PDGFB/MYL5/ITGA5/LPAR1/MSN/ARHGEF6/PPP1R12A/ITGB5/TMSB4X/F2R/PXN/WASF2/PPP1CA/PDGFC/MYL12A/GNA12/ITGB2…
hsa04921	Oxytocin signaling pathway	126	0.328746	1.32585	0.0483843	0.0483843	0.0788607	1245	tags=21%, list=11%, signal=19%	5332/55799/3763/784/816/115/107/9254/5530/51422/3761/5532/109/6262/5571/818/10368/9475/2775/6261/1956/3708/57172/8605/5594/952	PLCB4/CACNA2D3/KCNJ6/CACNB3/CAMK2B/ADCY9/ADCY1/CACNA2D2/PPP3CA/PRKAG2/KCNJ4/PPP3CB/ADCY3/RYR2/PRKAG1/CAMK2G/CACNG3/ROCK2/GNAO1/RYR1/EGFR/ITPR1/CAMK1G/PLA2G4C/MAPK1/CD38
